# Supplementary material
Source: publisher figshare collection journal article supplement (https://gsajournals.figshare.com/ndownloader/files/26579636)
Supplement: Supplementary file 1 [file 26579636]

>contig_1
CGATCTCCCCATCGCGCTTTCCATTCGAGAGCTAGTCGCGCTTCGTCTGACCACTTAACG
CCACGCTCTGTACCGAATGCCTGTATAAGCTCTAATAGCTCCGCAAATTCGCCTACACGC
ATCCTGCTGGTTGACTGGCCTATTACCACAAAGCCATTCCCGGCAAGGTTAGGAACAACA
TCCTGCTGCTTTAATGCTGCGGTAAACACACACTTCCAGCTTTCTGCATCCAGCCAGCGA
CCATGCCATTCAACCTGACGAGAGACGTCACCTAAGCATGCCCATAGCTTCCTGTTTTGG
TCTAAGCTGCGGTTGCGTTCCTGAATGGTTACTACGATTGGTTTGGTTGGGTCTGGAAGG
ATTTGCTGTACTGCGTGAATAGCGTTCTGCTGATGTGCCGGAGATCGAATTTCAAAGGTT
AGTTTTTTCATGACTTCCCTCTCCCCCAAATAAAAAGGCCTGCGATTACCAGCAGGCCTG
TTATTAGCTCAGTGATGTAGATGGTCATACGTCCGCCCCTTGTGCATATCGTCTGCCACG
CGCAGCAGGTGCATTTGATGCTGTGCAAATCTGTCTGGCTTCATCCTGGTCACATGCAAC
AAAGTGTCCGTTGCAGAACCGCTGGTAAACCGTACCAAGCGAGCCAAAACGGTTTTTCGT
CACGATGATTTCAGCAAATGGCGCGGCGCTACTGTTCTCGTCATATACCGCTTCCCGATA
GAGCATGATGATTGAGTCTGCATCCTGTTCAATGCTTCCTGAATCACGCAAATCTGCGTT
TGTCGGGCGTTTGTTTGGTCGCTTCTCAACATCGCGCGAAAGCTGACTCAGGGAGATAAC
AGGCGTTTTCAGGTCTTTCGCCATCGCCTTCAGGCTTCCGGAGATGTGAGCAATTGCAAG
GTCGTTGCGGTCTGCTTTCGGCTTCTCAATCAGGCCAAGATAATCCGCCATGATGAGTGA
CAGGTTTGGATTTTCCTGTTTGTGCCGTTCTGCGATTGAGCGTATTTCTTCGACCGATAA
CCGCGAGGCATCGACTACCCATACATCCAAATCTGCAAGCTGATTCATGCCGTTAGCAAC
GCGCGCCCAGCCTTCGTCATCCATCGATGCAGGATTTCGCAGCACGCTAACCGACATCCT
CCCGGCGTTGGCAATGCTTCGCTCTGCAATCTGCAATGCGCTCATTTCCATTGAGAAAAT
CAATACCCCGCGCCTGACGTCAGAACCAGGAAGAACGCGGCTTGCAACGCCTTCGGCAAT
CTTTAGCGCCAGTTCGGTTTTCCCCATACCAGGACGAGCGGCGATTATCACCAGGTCTTC
CGCGTTCATCCCTCCGGTGATGGCGTCAAGTTCTTCGATTCCGGTCTTCAGGGTATCTGA
TTCCTCTCCGTTCCTCAGACGCCTGTCAAGCGTGTCAGTGTAGTCAGTAATGATTTCCCC
TAACCGTACAGGTTTTACCTCGTCACGGGGCTTTCTGATGGCTGAGAGACGCTTTACAAG
TTCATCCATCGCCTGACTCGATGCGTCGATGGTTCCGCTCTGAATTGGTTCACGCATTTC
ATCCATGATTTCCAGCACCAGACGGCGGTGATAGTTATCCGCGACCATTCCGGCATATCC
CTTCAGGTTTGCGGCGCTCGGGCAGTTTTTGCTGGTCATCAGGATTGAGGTGAAATGCTC
CTCTCCGCACGCCTCGGCAACCATCAGCGCGTCGATTAGGTTTCTGTTTCTCGCCTGCTT
GCGGATAACCTCGAAGGCTTTCCGGTAGAGCGGAATTGAAAACGCTTCCGGCTCCAGTGT
TGCCAGAACGTCGCTGGCGGTTGGAGTTAATCCACCAATCAGCAGGCCACCGATAACACT
CGCTTCGATATCCTGTCTCATGCAATCCCCCTGTCTGCAAACTTCCCTTCCCGTACTCCC
GTTAACGAATCTTCCCTCAGCAGGTAATCAAAATCTGCCGTCCAGCCAGTGTCGTTGTCT
CCGAAGTAAAACGGCTTGGCCTGATGCACAAACGCCCTGACATACGCTCTGAAACCGTCC
ACGTTTGGCGTTTTCAGTTGCGGGATGATTTTCTTCAGGCGGCGTTTGCGTTTCTCGTTG
ACCGCAACAGCGTGTGGCAGTCTGTCACCGACTTCGGTGTTGTAGGCGTTCAGGAAGGAT
TCGTAGTCGATTCGTTCTGCCTTGCGACGTTCAGGTTTAACCTGCCCATCGCCTCCCCCA
TTGGGGGGTAGGGGGTATTATTTATATTCTTGTTAATACCTTCTTGTTCATCATGTGCGG
TTGTTTGTGCGGCTTCATGTGCGCTTTCATGTGCGGCATGTGCGCTGAAAGCCGCGCCAT
TACTGGCTTCGTCATGTGCGGCATCATGTGCGGTTGTTTGTGCGGCTTCATGTGCGGGTA
AATTGTCCATTTTTTGAGCATATTCATGGTAATTTGTGATGGTGATCACACGACCTTTTT
GCTTCTCTCCATCAATGGAGATCATCCCCTCTTTCACAAAAACCTGAAGCATCCGCTCAA
CCTGATCACGGCTTGCTGGCTTGCCATGTCTGTCGCATAACTGAAGACCTAAATCAGCTG
CTGTCACAACCAGTTGACCGGGTTGCAGATGCCATTCATGACCTTTGAAATTCGCTTTGT
ATGGCTTTCTGGCGGCATTCAGGAGAAGGTTTTCCCACAGGGTGCGAAGATAAACATCTT
TCGCCCATGACTGTTTCAGAATGCTCCGGTACAACGGAATGTAACCAGTTTTCTGGTTCT
CCATCCTGTTGCTCCTGCGCTCGTGTGCGGCGCTGAAATCGTAGATTTTTGCTGTATTGC
TCATAACTACCTGCCTTGACGAAAGACCTTAAGAACATTGTTAAACTGACTTACGGATAT
GTCTTCTTTGAGCAGCTTTTCCAGAAATGCGTTTGGAATGAACGTATATCCCTCCTCTTT
TGGTAGAGACGGAAGCAACGCCCTCGCCTCAGCCTTCAGAAGCTCAGTTCTGGCAACTTT
CACAAAAGAGATTTGAGTTCTTTCATCAATGGAACGAAGGAAGCGCAAACGCTTAGCTTC
TTTGTGTGTATCAGGTGGATTAAAGCCTTTGTTTCGCATATAATTACCTCGCTGGATATT
GTTAAAATTCCATCTGGGTTTGTTCAGAACGCTCGGTTGCCGCCGGGCGTTTTTTATTGG
TGAGTCCATCAAGCGCATACTTAAAAGCCCTACTAATCGGACTGATGTCTGATGCCATTC
CGAAAGCACACAAGACCGAAGCAATAAATCTCCAGTCCGTTCTGCTTATCTTCGATTCAT
GACAGCCAATCATCTTTGCCAGACCGCGCTGGGTAAGCGTTGACAGGTTGATGAGTAAAT
CTGTTTCTGCGCGATCAATTTCTCGCTGTGTTGGCTTGCTGTAACTTGCTTGTGTCATTT
CTTAATATTTCCAATAGTGAATAGTTAGTTGAAAGATATGCGTGGAAACGCATATGGCCT
TAGTTGGTCAGATATATTGGGACTCGCTTTGTCAGCGACGTAGGACGAATGTCCATTGTG
AAAATAGCGGTGTTACTTATGCAGTTGTTTTTTTGTTACTTGGGAAGGGCTTTACCTCTT
CCGCATAAACGCTTCCATCAGCGTTTATAGTTAAAAAAATCTTTCGGCCTGCATGAATGG
CCTTGTTGATCGCGCTTTGATATACGCCGAGATCTTTAGCTGTCTTGGTTTGCCCAAAGC
GCATTGCATAATCTTTCAGGGTTATGCGTTGTTCCATACAACCTCCTTAGTACATGCAAC
CATTATCACCGCCAGAGGTAAAATAGTCAACACGCACGGTGTTAGATATTTATCCCTTGC
GGTGATAGATTTAACGTATGAGCGCAAAAAAGAAACCATTAACACAAGAGCAGCTTGAGG
ACGCACGTCGCCTTAAAGCTATTTATGAAAAAAAGAAAAATGAACTTGGCTTATCCCAGG
AATCTGTCGCAGACAAGATGGGGATGGGACAGTCAGGCGTTGGTGCTTTATTTAATGGCA
TCAATGCATTAAATGCTTATAACGCCGCATTGCTTGCAAAAATTCTCAACGTTAGCGTTG
AAGAATTTAGCCCTTCAATCGCCAGAGAAATCTACGAGATGTATGAAGCGGTTAGTATGC
AGCCGTCACTTAGAAGTGAGTATGAGTACCCTGTTTTTTCTCATGTTCAGGCCGGGATGT
TCTCGCCTGAGCTTAGAACCTTTACCAAAGGTGATGCGGAGAGATGGGTAAGCACAACCA
AAAAAGCCAGTGATTCTGCATTCTGGCTTGAGGTTGAAGGTAATTCCATGACCGCGCCAA
CAGGATCCAAACCTAGTTTTCCTGACGGGATGTTAATTCTGGTTGACCCTGAGCAGGCTG
TTGAGCCAGGTGATTTCTGCATAGCCAGACTTGGGGGTGATGAGTTTACCTTCAAGAAAC
TGATCAGGGATAGCGGTCAGGTGTTTTTACAACCACTAAACCCACAGTACCCAATGATCC
CATGCAATGAGAGTTGTTCCGTTGTGGGGAAAGTTATCGCCAGCCAGTGGCCTGAAGAGA
CGTTTGGATAACACGTAAATGATTAAAGAACGTATTTCTTATATCATTCCGATTGCGATG
GATGAAGGCAACCCAGTAACTCCAGTTCTTATCTATGAAATGGATAAAGACTCCCATGAA
GTGGATCTATCATTTGGCGCTTTTTTTATCGGCCTTAAGGCTACAAAAAAATATTCCATA
GGCATTGAGGTTTTCAATGCTCAAGAAATACCGATACCAATTGACACAAAACTGTACTCC
AACCATAAGTTTTTTACGGTAGCAGAAGCCAACGATGGAGAAACCATCGTATCAACTTCT
ATGAGAATTAACTTCCCAAGGGTGAAAATTATCAAGCCTGGGATATTCGAAGTTAGAGCA
TCACTGGTTAATCCTGATAAAGGCGAAGTAATTGATGTAAAAAGTTCGTTTTTTGACGTG
AAGATAACAGGATCAGTTCGCGATGAGTTTAGATAACAAGGTTGCTCAGCTTCGTCCAAA
TCAAAACATATCTCGCCCAATTGGACACTATTCCACTGATGATGCATACTCACGGCATGG
TGGAGGAAACGGCGGAGGTAACATGCTTGAGGCTAGAGTTGCAAAGCTAGAGTCTGATGT
TGAATACATCAAGCGCGATCTCGCTGAAGTAAAGTCAGATATAAAATCTGTAGATTCTCG
TCTGTCAGGTATTGAGACAAGCATTAGCTCAGCAAAAATCACCATCAAGGCATCTGCGGT
CGTTGTCAGTTTCGTGTTCGCATTTTGCGCCTACATTTTTGGAAGTTATGTTTCCAAAAT
CCTTGATGCCTTAAACGGACTCGTTCTTAAGTAACACACAACCCGGCCTCAGCGCCGGGT
TTTCTTTACCTCACGATCCCCTTCACCCAATAACACATAACCAATTGTATTTATTTGAAA
ATTAATAGATACAACTCACTAAACATCGCAATTCAGATCTCTCGATCACCTCCCAAGCCA
CACACCCCTGCAAAAAAATAAATCTATATAAAAAACATACAGATAACCATCTGCGGTGAT
AAATTATCTCTGGCGGTGTTGGCATAAATACCACTGGCGGTGATACTAAACACATCAGCA
GGACGCACTACTCACCAGGGCGGTGAATATACAACGATTCAAGCAAGAATCTACGGCGCT
GACAAAGCGCAATAACCAAAGTGAACTTTGGGGTGTGGTGAAGGGTTCATGGACGGGAAT
ATGTCGCACGTAAAGCGGCGAGGCCTGCGGGACTATTGCCGAATTGAAGTAGGCCGAAAC
AGGTCGAAATGGGTCTCCCACCTACCACACCACCAAAGTTCACCAGGAGGTCTATATGAC
ACGCAGAACTCAGTTCAAAGGCAATTCACGTTCTCGTCGTCGTGAGCGTTTAAAGGCAAA
GGCATTAGCTAACGGCGTACTGGCCCGCGAAGAAGCAATAAGTTCAGAAGTATTACACCG
CCCTACTCTAAGCAGAGCGCAGATTCAGGCTAAAGGTACTCACGAAACGCCTGAGCGCAT
AGAAGACGCTAAGCCAATTAAGTTCATGGCACAGGACGTGATCTGGCAACAGAAAGAATA
CAGACGCAATCTGGAGCGAGCGGCCATTGTGTACGCGAATGAGTTTGGACATAAGCAACC
AGAAACTGGTGTATGTCTTCCAAACGTAGCCATTTACGCGGCAGGATACCGGAAATCAAA
ACAACTGACAGCAAGATGACTTGTGTTGGTCGCCAGAAAATGAAATTAGGCAGCAAACCA
CTTATTTGAGGTGAGATATGACAAAATCATGGAGCGTACCTTTTCCTGAATCAGAAACTG
AACATGAGGGAATGCCTGTTTTCTGGAGATTCCAGGCGACAGTTGAAGAAGATGGAATCA
AAATATTCGCACTTCAATATATAGCTTTTCATCAGACAGAGCATTATGCATGGTTGGTTC
CTGCGCATTGGATTGTTAATTTTAAACCAGCACCAAATCAGTGGTTACAGGAATGGAAAC
AAAAGAGAAATAGATATGCAATTAAGAAAGTAGCAAAAAATGCAGAAAGATCTTTTGCAT
TCCCAACGAAGAAACTTGCCATTGAAAGTTTATTGCGCCGAAAGAAATACCATTTAATGA
GAATCAAACAAGATTTGGCTGTTGTATCAACTCTTGTTGATGGGATGAAGAATATTGATA
CATCAACACCAGATATTGAATATAACTTTGGACACAACCAAGAAACAGAAAATTGGGTAT
TCTACTAGGCCGCATAGTCGGCCTTTATTTTTGGCATAAACAACAGAGGCTAACATGGGA
TTTAAAGGTACTGAAGGTAAGTGGGAAATAATGATGGATGGGGATGAGATTAAAATCATC
CAGGCAGACTCTCTTGAAAATGGCACAGGCTGGCGTTCGTATATTGCAATCTGTGAGGAA
GTTCAATGTATTGAAGATGCCAATCTAATAGCGGCAGCACCTGACCTTCTCGAAGCACTT
CAGTTATTACTTAATCAATCCAAAAATAGAACAACGACAACATATCCAGAATGGTATGGA
GCTGTTAATAAAGGTCTTGCAGCAATCAGAAAAGCTCTTGGGGATAAGTAATGAAAGTAA
AAATAACTGCTTCTAACACCAGTTTTATTAGTGTTGGTGATATTACAGAAGTAATAACAA
ACCATGATGGAACCCAAGTTATGTGGTCTGATCTTTGTAAAAGATATGAGCGAGTTAGTT
GGTGTAAACTCGTATGGGGCGTCGAATACGAAGAAATACCTGAAATGCATGACGAATAAG
CACTGTGTATTCATTCCAACGAGTGAATACACGGAGCAATGTCGCTCGTAACTAAACAGG
AGCCGACTTGTTCTGATTATTGGAAATCTTCTTTGCCCTCCAATGTGAGGGCGATTTTTT
TAACGGAGGATATATGAGTGAAGTAACAGATTTAGTTGTTATTGAAAAAGCAAATGCAAT
GACTGTATTTCAGTCTGCCGACCAGATTGAAGAAATCCTTCAAAAGGTTGAACGTGAAGT
TATGTCCTTTGTGCCTGATATCACAACGGCAAAGGGCAGAAAGGAGATCGCTTCTCTGGC
GTATAAAGTTGCGCAGACGAAAACATATCTCGATGGCCTTGGCAAAGACCTTGTTGCTGA
ACTGAAGGAAATTCCAAAGCTAATTGATGCCAACCGCAAGACAGTGCGCGATCGCCTTGA
TGAGCTGAAAGCCAAGGCGCGCCAGCCTCTTACTGATTATGAGGAAGAACAGGCGCGGAT
TAAAGCCGAAGAAGAAGCTAAGGCAGCAGCTGAAGCTCTCGCAAAGCAAATTGAGTCTGA
CCATGAAATAGCGATTTTGATGGATCGCGAATTTGACCGCCAAAGAGAAGAGGCAAGACT
CAAAGCGGAGCAGGAAAAGCGAGAGCATGAAGAACGCTTAAAAAGAGAAGCTGAAGAGAA
AGCCAGAGCAGAAGCCGAAGCAAAGGCAAAAGCCGAAATTGAAGCAGCAGCAAGGCGAGA
AGCAGAAGCTAAGGCCGCAGCGGAACGTGCAGAGCGTGAACGCATTGAAGCCGAGCAACG
AGCACAGCGCGAAGCAAAAGAGGCAGCAGAACGAGCTGAAAGAGAAAAGCAGGCGGCAAT
TGAAGCAGAACGCCGAAAAGCACAGGAGGAGGCTGAACGAATCCGGCGCGAGGCTGAAGC
AAAAGAGCAAGCCAGAATAGCAGAAGAAAAAAGAATCAAGGACGAAGAAGAGCGTAGAGC
AAAGGATAAAGCTCACCGGAAAGAAGTAAATAACAAAATACTTGCTGACCTTATCAAGGT
TGGTGCATCAGAAGATGTTGCTAAAAATATCATAACAGCCATCGCAAAAGGCGAAGTATT
CGCAACAAAAATAACCTACTAATAAACCAACATAAGGAACCACCCATGATTTACGCAATC
GCGGGAGGCGCTCGCATGGGTGCCTTCCAACTAAATGAATCTTTACTTGAACGAATCACC
CGTAAATTACGTGACGGATGGAAAAGAGTTGAGGTCTTATTATGCGCAATGAAATAGCCA
TCAATCACCAGATGCTTCGTGCTGCACAGAACAAAGCAGTAATAGCCAGATTTATTGGTG
ATTCAAAAATGTGGCTTGAAGCAAATAAAGCGATGAAATCAGCTATCAACCTTCCGTGGT
ATCGCAGGAAATGAGTTTTACAGATAACTGGTCAGACGAAGAATTCATTCGTCAGATGAA
AGAATTAATCGGTAACGAAGGAGATATTCATGTCACTTGCAACCACAGTGAAGGAGAGCA
AGTTACAGAGACGCATGTACACGCAGAAAGCTCTCTGGTATCGCCATAATGGTGACCGCG
AAGGAATGCGGGTATGCCTTAATTTGTCCCGAGTCGAAGTATTAAATCAGCGTTATTTCC
TTGGGCCGTGTCCATTCTGAGGTGAATTATGGATTTGAACAAATTCGATGAGCCATTCAG
CCCTGAAGATATAGAATGGAGAATACAGCAAAGCGGTAAAACACGCGATGGCAAGGTGTG
GGCTATGGTGCTGGCTTATGTCACGAACAGGGCAATCATGAAACGCCTTGACGATGTTTG
CGGCAAAGCAGGATGGCGCAATGAATACCGAGATATTCCCAACAACGGAGGCGTTGAATG
CGGCATATCAATCAGGATTGATTCCGAATGGGTAACCAAATGGGATGCTGCTGAAAACAC
GCAGGTAGAAGCCGTAAAAGGTGGTCGTTCCGGTGCAATGAAGCGCGCTGCCGTTCAGTG
GGGAATCGGTCGGTATCTGTATAACCTTGAGGAAGGTTTCGCACAAACATCTCTCGATAA
AAAGCAGGGATGGCACAGGGCAAAACTCAAGGATGGAACAGGATTTTACTGGCTCCCTCC
ATCGCTGCCGGGATGGGCAATCCCAGCATCAGATAACAAACCATCACCAGAAAATACCAA
CCAGACATCTCCATCGGTTGACTGCGAACAAATCCTGAAAGACTTCAGCGATTATGCATC
AACAGAAACTGACAAGAAAAAACTCATCGAGCGTTATCAGCGTGACTGGCAATTAATGGC
TGGCAACGAGGAGGCACAGGCTAAATGCGTTCAGGTAATGAACATCAGAGTTAACGAACT
AAAACAGGCGGCATAAATGTCTCACTTGGACGGAATTATTAAAAGATTCGAGTCCAGCTA
CAAAGTTAATGAAACAACAGGTTGCTGGGAGTCTACCTATTCAAAAAACAAAGGAGGATA
CACAAAATTTGTAGCCTTTGGCGTAACAATGCTTTCTCATCGGGTTGCTTTTGAGCTTTA
TCACTCCCCCATTCCATCTGGGAAGATGGTTTGCCACAAATGCGATAACCAATGCTGCGT
TAATCCTGAACATCTCTTTTTAGGTAGCGCGCAAGAAAACATGGACGACAAGATAGCAAA
AGGAAGGCATCGTGGAGCCAAGAAAGGTCATGCTCATCATGGTGCAAAATTAACAGAGTG
GCAGGTTATAGAAATTAGGAAAAGACTCTCTGAAAAAGAGAGTCAGTACAAGATAGCAAA
AGACATGGGTGTATCTCAATCAATTATAAGCAACATAAAAACTGGCAAGAGGTGGAGCAA
ATGAGTTCTCGCGGGATAAATAAGGTGATTATCCTTGGTCGGGTAGGACAAGACCCGGAA
GTTCGATACTCACCATCAGGAACAGCGTTCGCTAACCTGACAATAGCCACGTCAGAACAA
TGGCGAGATAAAAATACTGGCGAGCAAAAGGAATTGACTGAATGGCATCGTGTTGCTGTA
TCCGGGAAACTGGCTGAGGTCGTGGGGCAGTATGTGAAAAAAGGTGATCAGATTTATTTC
GAGGGAATGCTGAGAACCAGAAAGTGGAAAGACCAGTCAGGGCAAGACCGTTACACAACC
GAGGTTCATGTCGGAATTAATGGCGTGATGCAAATGCTTGGCGGCATTGGCGACAGCAAA
CAACAAGCAGCCAGCAGGCAATCACAGAAGCCACAGCAGCAATCATCACCAGCACAACAC
AACGAACCTCCGATGGATTTTGACGACGATATACCCTTTGCACCAGTAACTCTCCCCTTC
CCTCGTCACGCTATTCACGCAATTTAATCAGGAGAAAATCATGCCAGCGCCTCTGTATGG
TGCGGATGACCCGCGCCGCTGTTCCGGCAATTCCGTATCGGAGGTGCTGGATAAATTCAG
AAAAAACTACGATCGAATAATGTCTCTACCGCAGGAAACGAAAGAGGAAAAGGAATTTCG
CCACTGTATATGGCTTGCAGAGAAAGAAGAACGCGAGCGAATTTACCAGACATCAATCCG
ACCATTCCGCAAAGCCACATATACCCACTTCCCTGAAATTGACCCGCGCCTGCGTAATTA
CCGCTCACGTTATGGCGCTATCAGTAATGACTGAGGAATTTACCATGAGAGGACTTGCAT
ACAATCCCGGCATTCTTCCGGCAGAAATGATTATTCGCCAACGCGTAAAGCCAATGCCAT
CGAGAGAGGAATTGCTTAAGAGAAATTCTTCTCCGTCAGTGAATCAAAACAAATATCTGA
ATGCGATGTGGCGCAAAGGAGGCAACCAGTGAGTGAGTCAAAATGCCAAATTAATGGCAA
CAAGATAGAACCGTGCGCGGCGTTGGCAAAATCTCTCGAATATGGAAATCCAACATTCAA
GAGTAAAGGCATATTTATCCCGGAGCGTGTGAACATAAACACCGGCGAGTCATGCATAGA
TATTGCTCAAATTCACTCGGGGAAATATATCGGTCGTGGCGTTGCAATGTGCTTTTGCCC
GTTCTGTGGTGAAAGTTTGAAAACGTGGGAAGCGGAGGCAGCCAGTGAGCAAAATTGACC
ATCAGGCACTGCGTGAGGCGGCAGAGCAGGCAATGCATGACGACTGGGGATTTGACGCGG
ACCTTTTCCATGAGCTGGTAACACCATCGATTGTGCTGGAACTGCTGGATGAACAGGAAA
GAAACCAGCAATACATCAAACGCCGCGACCAGGAGAACGAGGAGATTGCGCTTACGGTTG
GGAAGCTGCGTGTTGAGCTTGAAGCAGCAGAGAACAACCTTATTGATAGTGAATGCCATG
TTGCTGAACTGGAAGAAGCTCTACGCGATAAGCAGGCGTTACTTGAAGCCTCAGAAAAGC
GCAACGCAAAATTACAAAGCGAGAATGCATACATCCGCAACCGGTACAAAGAACTGGACC
TATTAATCGGGAAAAACATTCTGGTCATGCAGGCTGCCATTATCGAATGGCAGGCAACTG
GCGACGCTAAGAGCGGACTAGCATGGATTTATAACACACTGTTTGGCCCTGGCGAATTAC
CGGACGAATCTGAGAAAGATGCTCAGGCCTACTTTAATCGCAAATATGCACCGATTGACG
AAAAGCTTATGGCGCTTCACAAGTGGTTTTGGGAACAAAGTGAAGCCGAGCGCGCCGCTG
GCATTCGCATCAAAGGAGAGTGAGATGAACGGACAAATCTCAATTGTTCGACCGGGAGCA
TGTGACGATTGCGAGATACGAATGATTATTCGTCTGGCGAGGGGGAAAACAATAACTGCT
CTCATTACTCCAGAAAATCTCGCATTAGCATTAACCGGAAAGTCAGACCTGCCAGTAGAG
CTAAAGCTGCGAAATGTTGAGATTAAGGTGAAATAGCTATGACCACTATTACCAAAGAGC
GACTGCTGACAATCAAGCAGTGGCGCGAAACATACGGACCGGGTAGCAACGTTGTACTGC
CAGCAGAAGAAGCGGAAGAACTGGCACGAATTGCTCTGGCATCGCTGGAAGTCGAGCCGA
TAGGTTTCCGTTGCAGGCGCAATGATAACCTTGGTGATTGGAGTTACGTATATCATCGAG
AGCCAGATGATTTTGAGCGCAAACATTTAGTGATAGAGGGCATTTACGCCGCCCCTCCAG
CGCAAGTAGTACCGAAAGAAAAACCAATGCCTAATCCTCTTAGCATGTACGCGGTTGATG
CTGTTGCCGCTATTGCAGAGGTGAGAGGCTGGAACGCCTGCCGTGCCGCTATGCTTCAGG
GGAAAGGAGACTGATATGGATAAAAACACCACTGCTTACTGGAATCTGTCACTTGATACC
GAATGCCCAAAATGCGGTCACAATTTCGATCTGCTTTGTGACGCTGATTTCTGGGAGTTT
TCTGGAGCTAAACAGGCATGTGAAGAAATAAAAGGTTACGAAACATGCTGTCCAGAATGT
AACCATGAATTTAAAACAGATTTCGTGTATTGAGGCATAACAAATGACCACTATTACCAG
AGAACAGGCACAGAAAATTATTGAAGCAGCCGATGAGGTTATTAGTGCGCTTGCCGGAAC
TAACGAGGATGTTCACCCTGGTAGCGATAACATGCTACGCCTGTGGGATGACCTGAATGA
CCGTTACGCGCCCCCTGAAGTTGTGCGTGAGCTGGCACGAATTGCACTGGCATCACTGGA
AGCAGAGCCTGTAAGCCAAACTTACAACTTGCCAGAATTAATCGAAGGGATGGAAGTTTC
CATTGATGTAAGCACTTGTGATGCTGATTTAGGTAATCGCTATTTCGGTACCGTCACCGA
GGCGTTAGAACTTGATACAGCCAAGAATGGTTACATCCTCCTAGTTCAGGACGCAGAGCC
AAACTTCGATGTAAATGGCAACTCTCCGGTAATTCCGGGCGGTTGGATAAGCTGTAGTGA
GCGAATGCCGGATAGCAAAACAGCCGTTCTTGTTGCCAGGGAGTTTGACAGGAAAGGTGA
CTGGCGAATGAAATGGGCGACTTACATCCCGGGGCATCCTGACGCTAATGATGGGTGGGT
AATACCTGGTGCGTCGTGGATACCATCACACTGGATGCCGCTACCAGAACCGCCGCAGGA
GGTTAACCATGGCTAACCTGCAACTTGCCGTCAAAGGTGAATAACAATCCTCGCACTCGC
GGGGATTTCTTTTATCTGAACTCGCTACGGCGAGTTTTGTTTTATGGAGATGATAAATGC
ACTTCCGAGTCACAGGTGAATGGAATGGAGAACCATTCAACAGAGTTATCGAAGCGGAGA
ACATCAACGACTGCTATGACCACTGGATGCTGTGGGCGCAGATAGCACATGCAGACGTAA
CCAATATTCGAATTGAAGAACTGAAAGAACACCAAGCCGCCTGATGGCGGTTTTTTATTA
CCTGATTTGCAGGTTCGATTCCCTATTCGGAGATAGCACTCATGCAACACGAATTACAGC
CTGATTCACTGGTTGATTTGAAATTCATCATGGCCGATACTGGCTTCGGTAAAACCTTCA
TCTATGACCGGATTAAGTCCGGCGACCTGCCAAAAGCCAAAGTTATCCACGGGCGAGCAA
GATGGTTATATCGTGACCATTGTGAATTCAAAAATAAGCTCTTAAGCCGCGCCAATGGGT
AAAATAGCGGGTAAAATATTTCTCACATCTAAAAAACTCCATTCCAATCAATCCCCTGCC
GCTTCAAGTAGATGTCTGCAGGGGACACCAGATACCCTTCAAACGATATCTACCTTCACC
CCGTAAAAGATAAGTTTGGCAGCACATTTGCCCTATCTACTCATTTTTCCTGCAACAGGT
TGAAATCTCAACACGGTCAGAAAACGCTGATGACTAAACAGCCCTGGGCCGGGCGATGTA
ACCATCACACACAATCCTGATCGCGAAATATGGCGTGACTTGATACTTCACTCCACAATG
CTTTCCTTGATGAATTCGCAGGCCCGTGATACACGGGACAGGTCGCTGAATTACGACAAT
GCCCTGGAAATCAGCGAGCCGTGTATCCAGAGTACATTTGAGCGACTGTACCAGAACATG
AATGAGGCGTTTGGATTAGGCGATTATTAGCAGGGCTAAGCATTTTGGTATTATTATTTT
CCGGTTGAGGGATATAGAGCTATCGACAACAACCGGAAAAAGTTTACGTTTATATTGCTG
AAGGTACTGGCGTTTCCATCACTATTTGCTCACGTTTTTTACTCAGGAAGAAAATGCCAA
ATAGCAACATCAGGCAGACAATACCCGAAATTGCGAAAAAACCGTCTGGTAGCCTGCGTG
GTCAAAGAGTATCCCAGTCGGCGTTGAAAGCAGCACAATCCCCAACGAACTGGCAATTTG
AAAACCAATCAGAAAGATCGTCGACGACAGGCGCTTATCAAAATTTGCCACGCTGTATTT
GAAGACGGATATGACACAAAGTGGAACCTCAATGGCATGTAACAGCTTCACTAATGAAAT
AATCCAGGGGTTAACGAATAGCGCGCAGGAAAGGATACGCAACGCCATAATCACAACACC
GATAAGTAATGCATTTTTTGGCCCTACCCGATTCACAAAGAAAGGAATAATCGCCATGCA
CAGCGCTTCGAGTACCACCTGGAATGAGTTGAGATAACCATACAGGCGCGTTCCTACATC
GTGTGATTCGAATAAACCTGCATAAAAGACAGGAAAGAGTTGTTGATCAAAAATGTTATA
GAAAGACCACGTCCCCACAATAAATATGACGAAAACCCAGAAGTTTCGATCCTTGAAAAC
TGCGATAAAATCCTCTTTTTTTACCCCTCCCGCATCCGCCGCTATGCACTGGTGATCCTT
ATCTTTAAAACGCATGTTGATCATCATAAATACAGCGCCAAATAGCGAGACCAACCAGAA
GTTGATATGGGGACTGATACTAAAAAATATACCGGCAAAGAACGCGCCAATAGCATAGCC
AAAAGATCCCCAGGCGCGCGCTGTTCCATATTCGAAATGAAAATTTCGCGCCATTTTTTC
GGTGAAGCTGTCAAGCAAACCGCATCCCGCCAGATACCCCAGGCCAAAAAAGAGCGCCCC
CAGAATTAGACCTGCAGAAAAATTGCTTTGCAGTAACGGTTCATAAACGTAAATCATAAA
CGGTCCGGTCAAGACCAGAATGAAACTCATACACCAGATGAGCGGTTTCTTCAGACCGAG
TTTATCCTGAACGATGCCGTAGAACATCATAAATAGAATGCTGGTAAACTGGTTGACCGA
ATAAAGTGTACCTAATTCCGTCCCTGTTAATCCTAGATGTCCTTTCAGCCAAATAGCGTA
TAATGACCACCACAGCGACCAGGAAATAAAAAAGAGAAATGAGTAACTGGATGCAAAACG
ATAGTACGCATTTCTGAATGGAATATTCAGTGCCATAATTACCTGCCTGTCGTTAAAAAA
TTCATGTCCTATTTAGAGATAAGAGCGGCCTCGCCGTTTACTTCTCACTTTCCAGTTCTT
GTCGACATGGCAGCGCTGTCATTGCCCCTTTCGCTGTTACTGCAAGCGCTCCGCAACGTT
GAGCGAGATCGATAATTCGTCGCATTTCTCTCTCATCTGTAGATAACCCCGTAGAGGACA
GACCTGTGAGTAACCCGGCAACGAACGCATCTCCCGCCCCCGTGCTATCGACACAATTCA
CAGACATTCCAGCAAAATGGTGAACTTGTCCTCGATAACAGACCACCACCCCTTCTGCAC
CTTTAGTCACCAACAGCATGGCGATCTCATACTCTTTTGCCAGGGCGCATATATCCCGAT
CGTTCTGTGTTTTTCCACTGATAAGTCGCCATTCTTCTTCCGAGAGCTTGACGACATCCG
CCAGTTGTAGCGCCTGCCGCAAACACAAGCGGAGCAAATGCTCGTCTTGCCATAGATCTT
CACGAATATTGGGATCGAAGCTGACAAAACCTCCGGCATGCCGGAGCGCCGTCATCGCAG
TAAATGCGCTGGTACGCGAAGGCTCGGCAGACAACGCAATTGAACAGAGATGTAACCATT
CGCCATGTCGCCAGCAGGGCAAGTCTGTCGTCTCTAAAAAAGATCGGCACTGGGGCGGAC
CATAAACGTAAATGAACGTTCTCCTTGATCGTTCAGATCGACAAGCACCGTGGATGTCCG
GTGCCATTCATCTTGCTTCAGATACGTGATATCGACACCCTCAGTTAGCAGCGTTCTTTG
CATTAACGCACCAAAAGGATCATCACCGACCCGACCTATAAACCCACTTGTTCCGCCTAA
TCTGGCGATTCCCACCGCAACGTTAGCTGGCGCACCGCCAGGACAAGGCAGTAGCCGCCC
GTCTGATTCTGGCAAGAGATCTACGACCGCATCCCCTAAAACCCACACTTTGGCTGACAT
TTTTTTCCCTTAAATTCATCTGACTTACGCATAGTGATAAACCTCTTTTTCGCAAAATCG
TCATGGATTTACTAAAACATGCATATTCGATCACAAAACGTCATAGTTAACGTTAACATT
TGTGATATTCATCGCATTTATGAAAGTAAGGGACTTTATTTTTATAAAAGTTAACGTTAA
CAATTCACCAAATTTGCTTAACCAGGATGATAAAAATGACGCAATCTCGATTACATGCGG
CGCAAAACGCACTAGCAAAACTTCACGAGCGCCGAGGTAACACTTTCTATCCCCATTTTC
ACCTCGCGCCTCCTGCCGGGTGGATGAACGATCCAAACGGCCTGATCTGGTTTAACGATC
GTTATCACGCGTTTTATCAACATCACCCGATGAGCGAACACTGGGGGCCAATGCACTGGG
GACATGCCACCAGCGACGATATGATCCACTGGCAGCATGAGCCTATTGCGCTAGCGCCAG
GAGACGAGAATGACAAAGACGGGTGTTTTTCAGGTAGTGCTGTCGATGACAATGGTGTCC
TCTCACTTATCTACACCGGACACGTCTGGCTCGATGGTGCAGGTAATGACGATGCAATTC
GCGAAGTACAATGTCTGGCTACCAGTCGGGATGGTATTCATTTCGAGAAACAGGGTGTGA
TCCTCACTCCACCAGAAGGCATCATGCACTTCCGCGATCCTAAAGTGTGGCGTGAAGCCG
ACACATGGTGGATGGTAGTCGGGGCGAAAGATCCAGGCAACACGGGGCAGATCCTGCTTT
ATCGCGGCAGTTCATTGCGTGAATGGACTTTCGATCGCGTACTGGCCCACGCTGATGCGG
GTGAAAGCTATATGTGGGAATGTCCGGACTTTTTCAGCCTTGGCGATCAGCATTATCTGA
TGTTTTCCCCGCAGGGAATGAATGCCGAGGGATACAGTTATCGAAATCGCTTTCAAAGTG
GCGTAATACCCGGAATGTGGTCGCCAGGACGACTTTTTGCACAATCCGGGCATTTTACTG
AACTTGATAGCGGGCATGACTTTTATGCACCACAAAGCTTTTTAGCGAAGGATGGTCGGC
GTATTGTTATCGGCTGGATGGATATGTGGGAATCGCCAATGCCCTCAAAACGTGAAGGCT
GGGCAGGCTGCATGACGCTGGCGCGCGAGCTATCAGAGAGCAATGGCAAACTTCTACAAC
GCCCGGTACACGAAGCTGAGTCGTTACGCCAGCAGCATCAATCTATCTCTCCCCGCACAA
TCAGCAATAAATATGTTTTGCAGGAAAACGCGCAAGCAGTTGAGATTCAGTTGCAGTGGG
CGCTGAAGAACAGTGATGCCGAACATTACGGATTACAGCTCGGCACTGGAATGCGGCTGT
ATATTGATAACCAATCTGAGCGACTTGTTTTGTGGCGGTATTACCCACACGAGAATTTAG
ATGGCTACCGTAGTATTCCCCTCCCGCAGGGTGACATGCTCGCCCTAAGGATATTTATCG
ATACATCATCCGTGGAAGTATTTATTAACGACGGGGAGGCGGTGATGAGTAGCCGAATAT
ATCCGCAGCCAGAAGAACGGGAACTGTCGCTCTATGCCTCCCACGGAGTGGCTGTGCTGC
AATATGGAGCACTCTGGCAACTGGGTTAACATAATATCAGGTGGAACAACGGATCAACAG
CGGGCAAGGGATCCGCGTCACTCTTCCCCCTTCACGATCTTCAATAATATGCAATGCAGC
TTCCCGCCCGATAATGTCATGTGGAAGCTGAATTGTGGTCAGCGGCGGTAAAAACAGATG
CCCGACGCCAACCAGATTATCAAAGCCCATTACGGCGACATCCTGCGGGATACGTACCCC
CTTCGCCAGGAGAACCTGATAAGCGACAAAGGCTGCGCGATCGTTACCACATATCAGAAC
ATCAAAATCTGGTTTGCCCGATTTGAAGTGGGCATTGAGTAAACTTGCGAGATCGGTGTA
GTGATCATCACCTGTTGCCATGTGAAATTGTTTCACCTCAGCCAGATCTCGTCCAGCATC
ACGCCAGGCCTGCTCAAATCCCTGCCGACGATACCCTGTTGCCAACGCACTTTCCGGTAG
CCAGAAGCATAACGGTTGACGATAGCCCGCCGCGAGCAAATGCTGTGTTGATTCATATTG
TGCAGTGTAATCATCAGGGATATAACTGGGTAACGCTGGGTCATCCGCCACACAGTTCGC
CAATACAATATTTTCACCATACAGAGACTCAGGCAGCGTGATATGTCGCAGCCCCATTGT
AGTATAGATAATGCCATCCGGACGGTGGGCTAGCAGCTGACGTGCCGCGCGGGCAGCGTC
ATCTTCAGAAAAAATATTGATTAAAAAACTATTCCAGCCGAACTCGCTGGCGGTTTGCTC
AATGGCAAGCAGAATATCAACAGAGAAAGGAGTGGTAGCAGTGTCCTGTGCCAGCACGGC
GAGAGTCGACGGCTTACGTCCTTGAGCGCGCATTTTACGGGCGGAAAGATCAGGAACATA
ATTCAGGGTCTGGATTGCCTGCAATACGCGGTCACGCGTTGCAGGACGCACAGATTCTGC
ATTATGCATCACCCGGGAGACTGTCATCATCGACACTCCCGCCAGGCGTGCGACATCCTT
TAATGAAGCCATACCCAAGCCGTTTGCCGTAAAACGGGCACTGTAGCAGAAACAGACGTC
ACTGGCGAGATCCAACGATATTCTCGACGCCCTATCACCCGACACGGCAATACAATAAAA
AGTAACAATAATTCGCGGACAATTGTACCCAATTTCGCCTCTGTTCTCGCCAACGAGTCA
CCATGTAGGCAAGTAGGTAAAACATGCCAACCTGGAGAAGAAGATATAAATATGGATCAT
TGTGCTGCCGCTGTATCCCGACATCAGCCCGGAAATTATTGCGATTGCTATCGGTTCCGG
TGCGATTGGCTGCACGATCGTTACGGACTCGCTTTTCTGGCTGGTGAAGCAATATTGCGG
CGCTACGCTCAATGAAACATTTAAATACTATACGACAGCGACATTTATCGCTTCGGTCGT
CGCTCTGGCGGGCACATTCCTGCTGTCATTTATCATCTAAGCGCAAAGAGACGTACTATG
GAAAACGCTAAAATGAATTCGCTCATCGCCCAGTATCCGTTGGTAGAGGATCTGGTTGCT
CTTAAAGAAACCACCTGGTTTAATCCTGGCACGACCTCATTGGCAGAAGGTTTACCTTAT
GTTGGCCTGACCGAACAGGATGTTCAGGACGCCCATGCGCGCCTGTCTCGTTTTGCGCCG
TATCTGGCAAAAGCATTTCCTGAAACGGCTGCCGCGGGGGGATTATTGAATCAGAACTGG
TTGCTATTCCTGCTATGCAAAAACGGCTGGAAAAGGAATATCAACAACCGATCAGCGGGC
AACTGTTACTGAAAAAAGATAGCCATTTGCCTATTTCCGGCTCCATAAAAGCACGCGGCG
GGATTTATGAAGTCCTGGCACATGCAGAAAAACTGGCTCTGGAAGCGGGGTTGCTGACGC
TTGAAGATGACTACAGCAAACTGCTTTCCCCGGAGTTTAAACAGTTCTTTAGCCAATACA
GTATTGCTGTGGGATCAACCGGAAATCTGGGGTTATCAATTGGTATTATGAGCGCCCGCA
TCGGCTTTAAAGTAACGGTGCATATGTCTGCTGATGCCCGCGCCTGGAAAAAGCGAAACT
GCGCAGTCATGGCGTTACTGTCGTGGAATACGAGCAAGATTATGGTGTTGCCGTCGAGGA
AGGACGTAAAGCCGCGCAGTCTGACCCGAACTGTTTCTTTATTGATGACGAAAATTCCCG
CACGTTGTTCCTTGGATATTCCGTCGCAGGCCAGCGTCTTAAGGCGCAATTTGCTCAGCA
AGGTCGCATCGTCGATGCTGATAACCCTCTGTTTGTCTATCTGCCGTGTGGTGTTGGCGG
TGGTCCTGGTGGCGTCGCATTCGGACTTAAACTGGCGTTTGGCGATCATGTTCACTGCTT
TTTTGCCGAACCAACACACTCCCCGTGTATGTTATTAGGCGTCCATACCGGATTACACGA
TCAGATTTCTGTTCAGGATATTGGCATCGACAACCTTACCGCTGCCGATGGCCTTGCAGT
TGGTCGCGCATCGGGCTTTGTCGGGCGGGCAATGGAGCGTCTGCTGGATGGCTTCTATAC
CCTTAGCGATCAAACCATGTATGACATGCTTGGCTGGCGCAGGAAGAAGGCATTCGTCTT
GAACCTTCGGCACTGGCGGGTATGGCGGGGCCTCAGCGCGTGTGCGCATCAGTAAGTTAT
CAACAGATGCACGGTTTCAGCGCCGAACAACTGCGTAATGCCACTCATCTGGTGTGGGCG
ACGGGAGGTGGAATGGTGCCGGAAGAAGAGATGAATCAATATCTGGCAAAAGGCCGTTAA
TAACGTTTCAACGCAGCATCACCATCCTTTCCCTGGGTGAGCGATGCTGCGGATGACGCA
GACTTAAGATTCTGCCGTTTTACCTGCTATAGTCTCCTCTTTTTCCATCACCCAACGCCT
TTCGCTGTAAACGGCGGTTTCGCAAACCAAACCAAAACCGTAAGTAAGATAAAAGCAATA
GCCGCCATACGGAAAATCTCATTTGCAGAAATAGAAAGTGACTGCTGAGTTATTTCATTA
TTAATTTCATTAAGAACTCCTGAAAGCGAACCATAGTATTTATCCATAATTTGTGACGAT
GAATTAAACACGGGGTTAAATTGATCGATGGTTGCTGTCAACTGACTATGGTGTAACGAT
TCGCGGCGTCCCCACAGTGTCATTGTCAACGACGTACCAACTGATCCTGACAAGGTGCGA
AAAAAATTACTCATACTCGAGGCATTGGCAAATTTATTATCTGGCAAGCCTGAAAACGAA
ATCGTTGTTAAGGGTAAAAAGAAACAGGCAACGGCGAATCCCTGAAAAAACTGTGGCAAA
ATGATGCCTGTAAAATCAATCGTTGGCATAAATGTCACAGAACGCCAGTAATAGCAAACC
GCATACATCAAAAAACTAAATGTCACCAACAACCGCATATCTATTTTGTTGCCATAACGT
CCTATCAAAGGTGATATTAATAGCGGCATGATACCGATGGGCGCATAGGCAAGTCCGGCC
CATATCGCATTATACCCCATCGTTTCCTGGAGTAACTGCGGCATAAGAACTATCGCTCCA
GAGTAAAATAAATACGCGCATGTGATACTCACAATACCAATGGTGAAATTACGGGACTTA
AACAAACTGAGGTCAAGAATCGGATTCTCTGAGGTCGACTCCCAAATGACTAAAGAAATC
AGAGAAATAACTGATACTACTGTTAGTATTATTATTGTACTCGAGTTGAACCAATCCAGA
TCGCGCCCTTTATCAAGCATAATTTGCAAGCCACCAACACCGAGCACTAACAGGGTCAGT
CCTGGTAGATTCATTTTGACCGGTGAAGTCTCAGTTTCTCTTCCTTTAAGTAAGGTTAAG
CATAATGTCAGGACGATAATCCCCATAGGGACATTGATTAAAAATATCCAACCCCAGCTA
AAGTTATCGCAAATATAGCCGCCCAATATCGGCCCACATATCGGAGCGATAATCACGGTC
ATTGACCATAATGCCAGAGCAAATGTTCTTTTTTCTGGTGGATAATTCCTTAATAATAAA
CTCTGTGACAGTGGAATTAACGGCCCCGCCATTAACCCCTGAACGACTCTAAAAAATATC
AGCACATCTAGATTGGTCGATAAACTACACATTAATGAAGACAGCGAAAAAAAGGTTACT
GAAAGTAAAAATAACCTTAATTCGCCTATTCTTTGTGCCAGCCTGCCGGTAACAGGGATC
GCAATGGCATTTGCTACGCCAAACGAGGTGATAACCCAGGTGCCTTCGTCTGTTGATGCT
CCCAGAAAGCCAGATATTGTCGGTATTGCGACGTTAGAAATAGTGGAATCCAACATTTGC
ATAAACGTCGCTAATGACAATGCAATAGTGACGCACCATAACGTCCCACCGGTTAATGGT
GCAGGAGTTGATTTAGTGATTGCCATTAAAGTTGTCCATTATGCGAAATAATGTTGCTAA
TTTCTTTTTCTATCGGACTGGTATCGATAACTAAAGCCTTACTGGTATAAGCAGGCATGG
ACGTCACGGTTGAAGCCAGATCGGGCATCTCGGCAATGTCTTCATTCTTCGTATCAATAG
TAGCAGTCATCGATAAACCAATGCGCAAAGGGTGTTCCATAAGTTCTTTTGGATCCAGAG
AAACTTCAACCGGTACACGCTGAACGATTTTGATCCAGTTCCCTGTCGCATTTTGTGCAG
GTAATAAGGAGAACGCATTGCCGGTTCCCATATTGATCCCTGTCACCCGACCATGAAACA
CAACATTTTCACCATAAAGATCGCTGATAATATTGACCGATTGACCAATCCGTACATCCG
TGAGTTGTGTTTCTTTAAAGTTGGCATTAACCCACATTTGACGTGCCGGTACGACAGCCA
TTAACGATTGTCCGGGACTCACTGTTTCGCCGACCTGAACGCTTCTCTGGGCAATATAGC
CGGTAACAGGACTCTTAATATCCGTACGTTTAAGCGCTAACCAGGCTTCTTTGGTTGCAT
CCGCCGCTTCAACGACTTGTGGCTGACGGTTTAATGGTGTGTTCATTACTAAAGCTTTAT
TCGCTTTATAAGCCTGAATAGCAGCATTCAATGCCGCTTTGCTACTTATTAACGTATCTT
TGGTATGCTCCAGCGTTTCTTTTGAAATAACCCCCTGCTTCGCTAAAGGTACACGACGGT
TATAATCTTCTAAAGATTGTTGATACTGAATACGAGCTGAAGCGACTTCGGCACTGTATT
GTTTATCCTGTAAGTACAGTTTATTCGTTTGCCGAACAATATTGGCCAGATTATTTTTAG
CTTTATTGAGTGCGATAGTGGCATCAGTCTTATCCAGTGAGACTAAAATGTCACCCTGTC
GAACGTAGTTCGTATCTTTATGATTAACGACAGTGACGCTGCCTGAAACTTGTGCAGAAA
TTGGATCTGCATTCCCCGTGACATAGGCATCATCTGTACTAATCATGTCTTCTAATTCCA
TTGACCAATAGGCATAGGCACCTGAAAACGCAATAAATAAAACTACCGCCAATAAAGAAA
AGTATTTTCTTCTGTTAGAATGTTTTTTATTTGAATTAATCTGTTCCACTTTTATCTCTC
ATTTCGCATAGATGAAATTTATGAATTGAATGAAAAGAGTATTCATTCTTCATATCAAAC
ACAGTGCATGTGTTGCACATTATCCCAGGAACGTTGGAGGCCTAATTTAAATGAGGTGCA
AAAAAAACAACAGAGGACTAAACCGTGGCTTTTGCAATACAATTCTTACGCCTGTAGGAT
TAGTGAGAAAACTTATAGTGCTCATTTGAAACTATAAATCATCGGTATCATCCCTGATTT
TATTGTTGACATTTTATTTATGCCGACTATTTATATGGTATACTTGTCGAATTATCTTAA
AGGAAGCTCAAATTTTCTTATTTTTTTGAGAAAATGAGATGATGCCTTATGTCTGTATTA
CTACAGGGAGAAGGGAAATGCTTCATTGCAAAGGGAATAATCTATGAACGCAATAATTAT
TGATGACCATCCTCTTGCTATCGCAGCAATTCGTAATTTATTGATCAAAAACGATATTGA
AATCTTAGCAGAGTTGACTGAAGGCGGAAGCGCCGTTCAGCGGGTGGAAACACTTAAGCC
TGATATCGTCATCATTGATGTCGATATCCCCGGAGTTAACGGTATCCAGGTGTTAGAAAC
GCTGAGAAAGCGCCAATATAGCGGAATTATTATTATCGTCTCCGCTAAAAATGACCATTT
TTACGGGAAACATTGTGCTGATGCTGGCGCTAATGGTTTCGTGAGTAAAAAAGAAGGCAT
GAACAATATCATTGCGGCTATTGAAGCTGCAAAAAATGGCTACTGCTATTTCCCCTTCTC
TCTCAACCGGTTTGTTGGAAGTTTAACGTCCGACCAGCAAAAACTCGACTCCTTATCGAA
ACAAGAAATTAGTGTCATGCGGTATATTCTTGATGGCAAGGATAATAATGACATTGCTGA
AAAAATGTTCATCAGCAACAAAACTGTCAGCACTTATAAAAGTCGCTTGATGGAAAAATT
AGAATGCAAATCACTGATGGATCTTTACACATTCGCACAACGTAACAAAATCGGCTAACC
ACATGAAGTTTTTACCCTATATTTTTCTTCTCTGTTGTGGTCTTTGGTCGACCATAAGTT
TCGCAGACGGAGATTACATCGAATATCGTGGCATCAGTAGTAACAACCGTGTCACACTTG
ATCCACTACGTCTGAGCAACAAGGAATTACGTTGGCTAGCGAGCAAAAAAATCTTGTGAT
TGCAGTACACAAGTCCCAAACAGCTACGTTGTTGCATACCGATTCGCAGCAACGGATTCG
TGGTATTAATGCTGATTATTTAAATCTTTTAAAAAGAGCGTTAAATATCAAATTAACACT
CCGGGAATACGCAGATCATCAAAAAGCAATGGACGCGCTGGAAGACGGTGAAGTTGATAT
AGTGTTATCACATTTAGTTGCTTCGCCGCCTCTTAATGATGACATTGCTGCAACTAATCC
TCTGATAATTACCTTTCCGGCGCTGGTCACTACCCTTCACGATTCAATGCGACCGCTTAC
CTCATCAAAACCAGTAAATATTGCTCGAGTAGCAAATTATCCCCCAGACGAGGTAATTCA
TCAATCATTTCCAAAAGCAACAATTATCTCTTTTACAAATTTATATCAGGCATTAGCATC
CGTCTCAGCCGGACAGAATGATTACTTTATTGGTAGTAACATCATTACCAGCAGTATGAT
TTCCCGTTATTTTACTCACTCCTTAAATGTAGTGAAGTATTATAACTCACCGCGTCAATA
TAACTTTTTATTAACCAGAAAAGATTCAATCGTTCTTAATGAAGTACTCAATCGATTTGT
TGATGCTTTAACAAATGAAGTTCGCTATGAAGTATCACAAAATTGGCTTGATACAGGAAA
CCTGGCCTTTCTGAACAAACCATTAGAACTCACTGAACATGAAAAACAGTGGATTAAGCA
GCATCCCGATTTAAAGGTGCTGGAAAATCCTTACTCGCCACCCTATTCTATGACAGATGA
AACTGGCTCAGTTCGGGGCGTGATGGGTGATATTCTTAATATTATTACCTTGCAAACAGG
TTTAAATTTTTCTCCGATCACCGTTTCACATAATATTCATGCTGGGACACAGCTTAACCC
CGGTGGATGGGATATATTGCCCGCCGCTATTTATAGTGAAGATCGAGAAAATAATGTTTC
ATTTTCTGAAGTCTTCATAACAACGCCTTACGTTTTTGTCATGCAAAAAGCGCCTGACAG
TGAACAAACATTAAAAAAAGGAATGAAAGTTGCCATTCCATATTATTATGAGCTTCATTC
GCAATTAAAAGAGATGTATCCGGAGGTAGAGTGGATAAAAGTCGATAACGCCAGCGCTGC
ATTTCACAAGGTCAAGGAAGGTGAACTTGATGCTCTGGTCGCGACACAGTTAAATTCGCG
TTACATGATCGACCATTACTATCCTAATGAACTTTATCATTTTCTTATTCCCGGCGTTCA
GAATGCATCACTTTCGTTCGCTTTTCCTCGCGGAGAACCGGAACTTAAGGATATTATTAA
TAAAGCACTGAATGCAATTCCCCCAAGCGAAGTTCTGCGCCTGACCGAAAAATGGATTAA
AATGCCCAATGTGACCATTGACACATGGGACCTCTATAGCGAGCAGTTTTATATTGTTAC
GACATTATCCGTTTTATTAGTTGGCAGTAGCCTTTTATGGGGATTCTACCTGTTACGCTC
AGTTCGTCGTCGTAAAGTCATTCAGGGTGATTTAGAAAACCAAATATCATTCCGGAAAGC
ACTCTCGGACTCCTTACCGAATCCAACTTATGTTGTAAACTGGCAAGGTAATGTCATTAG
TCATAATAGTGCATTTGAACATTATTTCACTGATGATTACTACAAAAATGCAATGTTGCC
ATTAGAAAACAGTGAATCCCCCTTTAAAGATGTTTTTTCTAATACGCATGAAGTCACAGC
AGAAACGAAAGAAAACCGAACAATATACACACAGGTATTTGAAATTGATAATGGCATCGA
GAAAAGATGCATTAATCACTGGCATACCTTATGTAATCTGCCAGCAAGCGAACATGCTGT
TTATATTTGTGGTTGGCAAGATATTACCGAGACGCGTGATTTAATTCATGCACTCGAAGT
AGAGAGAAATAAAGCGATCAATGCAACTGTCGCAAAAAGCCAGTTTCTGGCAACAATGAG
TCACGAAATAAGAACACCAATAAGCTCCATTATGGGCTTCCTGGAACTACTGTCGGGTTC
TGGTCTTAGCAAGGAACAACGGGTGGAGGCGATTTCACTTGCCTACGCCACCGGACAATC
ACTCCTCGGCTTAATTGGTGAAATCCTTGATGTCGACAAAATTGAATCGGGTAACTATCA
ACTTCAACCACAATGGGTCGATATCCCTACTTTAGTCCAGAACACTTGTCACTCTTTCGC
TGCGATTGCTGCAAGCAAATCGATCGCATTAAGTTGCAGCAGTACGCTTCCTGAACGCTA
CCTGGTTAAGATCGACCCTCAGGCGTTTAAGCAGGTCTTATCTAATTTACTGAGTAATGC
TCTCAAATTTACTACCGAGGGGGCAGTAAAAATTACGACCTCCCTGGGTCACATTAATGA
CAACCACGCTGTTATCAAAATGACGATTATGGATTCTGGAAGTGGATTATCGCAGGAAGA
ACAACAACAACTGTTTAAACGCTATAGCCAAACAAGTGCAGGTCGTCAGCAAACAGGTTC
TGGTTTAGGCTTAATGATCTGCAAAGAATTAATTAAAAACATGCAGGGCGATTTGTCATT
AGAAAGTCATCCAGGCATAGGAACGATATTTACGATCACAATCCCGGTAGAAATTACCCA
ACAAGTGGCGGCTGTCGAGGCAAAAGCAGAACAACCTATCACACTACCTGAAAAGTTGAG
CATATTAATCGCGGATGATCATCCGACCAACAGGCTATTACTCAAACGCCAGCTAAATCT
ATTAGGATATGATGTTGATGAAGCCACTGATGGTGTGCAAGCGCTACACAAAGTCAGTAT
GCAACATTATGATCTGCTTATTACTGACGTTAATATGCCGAATATGGATGGTTTTGAGTT
GACTCGCAAACTCCGTGAGCAAAATTCTTCCTTACCCATCTGGGGGCTTACAGCCAACGC
ACAGGCTAACGAACGTGAAAAAGGGTTAAATTGCGGCATGAACTTATGTTTGTTCAAACC
GTTGACTCTGGATGTACTGAAAACACATTTAAGTCAGTTACACCAGGTTGCGCATATTGC
ACCTCAGTATCGCCACCTTGATATCGAGGCCCTGAAGAATAATACGGCGAATGATCTACA
ACTGATGCAGGAGATTCTCATGACTTTCCAGCATGAAACGCATAAAGATCTACCCGCCGC
GTTTCATGCACTAGAAGCTGGCGATAACAGAACTTTCCATCAGTGTATTCATCGCATCCA
CGGTGCGGCTAACATCCTGAATTTGCAAAAGTTGATTAATATTAGCCACCAGTTAGAAAT
AACACCTGTTTCAGATGACAGTAAGCCTGAAATTCTTCAGTTGCTGAACTCTGTAAAAGA
ACACATTGCAGAGCTGGACCAGGAGATTACTGCTTTCTGTCAGCAAAATGACTAAATAGC
GGCTCCCACAATGTTCAAATGTGGGAGCTATTTACCAGCACATCTTACATTTATGATGAG
AACTCCTGGCGAATTTGTTCCCCATGCTGGTCGAGCGTTGCCGCTCCCGGCATAACATGC
GGGTCCGCGCAGCCGCTGATTTTTATCGGATTACCCGGCATCATTATTCCCCCGGCTTCA
ATCAACATATTTCTCGCCTGAGTTTGTGGTAAATTAATGGCCTCAGCCACACTTAATAAC
GGCGCGACGGGCACACCAACTTCATGTATTCTGGCTAACCAAACTTCAGCTGCCTGCGTT
TTTAACGTTCGCTCAATATATTGTTTAAGAATAGCCTGGTTTTGTACGCGTAAAATATTG
CTGCTAAATCGGGGATCATTAACCAGTTCTGTAAGCTCCAGTGCCTGGCATAACACAGAA
AAAAGCTTGTCATTACCACAACAAATCGTAATCGGCTTATCCTGAGTATCAAAAACATCA
AAAGGTGCCATGTAGGGGTGACGATTTCCCAGACGTTGTGGTGACTTCCCAGTCGCGATA
TATGCCATCAGTCCGTGCTCCAGAAAACTCAGAGTGGCATCAAACATCGCTATATCGACA
TGCGCCCCTCGTTGGCTCTTTTCGCGGCCATAAAGTGCACTCACTATTCCACTGAATAAA
TAGACACCGCCACATAAATCCGCAAGAGAGGTACCCACGCGCACTGGCGGAGCATCAGGG
TATCCCGTTTCCATCATTATCCCGCTCATTGCCTGAATGATGGTATCGTAGGCAGGAGCA
TCTTTTAGCGGGCCGGTATGTCCGAAACCTGACGATGAAGCATAGATGAGGCGCGGGTTG
ATTTCTTGTAGCGTTTCCCATGAAAACCCGAGTTTTTCCATTGTACCTAGGCGAAAATTC
TCAGCTAATACATCCGCTTGTTTAAGCATATTTATAAATATGCTTTTATCGTGATCATTC
TTTAAATCAAGAACCACACTCTCTTTGCCATGATTAATAAAACTGTAATAGAGTGACTGT
CCATCCACATAGGGACCAAATGTGCGGGTATCATCACCATGACCCGGCGGCTCAACTTTA
ATTACCCTTGCACCCATATTACAAAGAAGTTGAGTTCCGAAAGGCCCATTAAGGACATGC
GTCATATCGATAACTAATAAGCCTTCAAACGGCCCTTTGCATTCATTATTTGTCATTTGC
TTATGCCTTGAAAAAAGCCGAAGGTGAAAAGACACTTCGGCATTTATGTAAAATAAATAA
CATGATTAATTATGAAACCAGTCGACTGACATAAATCCACAAAGGAGCCGTGACGACAAA
ACCCAGTACGCTCACAGCCAATGACGCTGTACCAGTGCGGGTGTAGACATTAAACCGACT
GGCAATAATGATTCCGGAGAATGCCGGCGGTAATGCGCCTGCCAGTACCATCATCTGCAG
ATGTTCGCTGTTCAAATGACATGCCATACCGACGAGAAGCAGCGCCAGTGGCATCAGAAT
CAGCTTCAGGAAAGTGTTATAAGCAATTTCGGCACTGAACTCGAATTTATGTGCAGCCAG
AGTCAACCCCGCAGCAAATACCGCTACCCCTGAGTTAGCCTTCGCAATCAGATTAAAGGT
TGGGTCCCATGCTGCCGGAATTTTTACCCCAACCAATACCAGGATCGTTGCCAGAACAGG
TGCCCATACTACTGGCTCCTTTGCCGCAGAAATTAATGCGCTCAGATTACTATTCTTCTT
ACCATCCGCTCCTGAGGAAGGATTCAGCAAATACAGACCAATAGGAATAGTAATTGCGTT
AACAATAATAGAAATAATTGCTACCACTAAACCTGTTGATACGGAATCACCATAAATAGG
ATCGAGAACTGCAAATCCCAGGAATCCGATGGTAGGTGAACCTGCAATTAATGCACATAC
TGCTGCTTCTGCATGGGTACGTTTAAAAAATTTGTAGCAACCAAACCAGGAGAAAAAGAA
ACATCCGACAATAACCACAAGTGATACAAGGGTCAGACGAGTGTCCGCAAAAATCATTTC
CCTGTTTGCCCGGGTAATAGAAACAAATAGGGCCGCAGGAAGAGCGTAGTTTAATACCAG
TTTATTAAATGCCCGGGCTTGATCTTCTGAAAAAGTTTCTCGTCTGCCGCTAAAATAACC
CAACAGCATGATTACGATAATAGGCAATAAATCGCCAATAAAAAATGTTAGCATAATAGT
ATTTCCGATAAGGGTCCCCTCACCATCGCATAATGAGTTGGCAAGAGGAGACGATGTCAG
TATTTAATTACCAGCGACTTGTTTTGGGTTAAGTTTGGTAATATGGCCACTTTCAGTTCC
TGCTGCAGGGTCGATGACCACATTAATAATGGTCGGTTTGCGCGACTGAATACCGGTGGT
TAAAGCATGACGAAGTTCATCTGTCGTGGTGACGTTATAGCCAACGCCACGAAACGCATC
CATTAATTTGTCATACCTTGCATGGTGCAGCAGATCCGTTGGTGATGGTGCACCAGCGCC
ACTGAGATCAACACCGTCTCCTCTGTAGATGCCGCCATTATTAAAAATAACGATCGTCAC
CGGCAGGTTATATCGACAAATCGTTTCAATCTCCATCCCACTGAAACCAAAAGCACTATC
ACCTTCAATGGCGACAACCGGAGAACCAGAGGTCACGCTAGCACCGATGGCATAGCCCAT
ACCGATGCCCATGACACCCCAGGTGCCACAATCCAGACGACGACGTGGTTTATACATATC
AATAATATTTCGTGCATTATCCAGGGTATTTGCCCCTTCATTAACTAAATAAATATCCTG
GTTCTCGCGCAAAACATCGCGCACAGCACTCAATGCATTAAAGTAATTTAATGGTTGGGT
ATCTGTACTTAACTTTTCATGCATTTTTTGTGCATTTTGCTGCTTGTGGATATTTAAAAT
ATCGCGCCACACCAGTGGAGTCGTGAATGTGTTTTGTTTCAATTCTGCCAGCATACCTTG
CATACTGGATGCAATATCGCCAACGACTGGAACAGCAATGGGGCGGTTGCTGTCAATTTC
CTGCGGTTCAATATCCAGTTGAATAAACTGTGTATCTGCCGCCCATCCTTTTTTACCGTG
TGCCAGTAACCAATTCAGTCGTGCACCGACAAGCATGACAACGTCAGCATTTGCCAGGGC
AAACGAACGCGCAGCTGCCGCAGAAAGTGGATGCGTATCTTCGAGGATCCCTTTCGCCAT
AGACATTGGCAGGAATGGAATCTGGGCACTTTCAATAAATTCACGAAGCTGTTCATCAGA
TTGTGAATACGCCGCGCCTTTGCCAAGGATAACTAATGGTCGTTCAGCTTTTGCTAAAAG
CGAAATTGCGCTAGCGACTGACTTTGGGCATGGCAATAATGCTGGCGACGGATTTTCAAC
TTTAACAATCGTGGTTAACGCTTCGTCTTTTTCCATCGTCGCGGCCAGGACATTTGCTGG
CAAATCAAGATAAACACCGCCAGGACGACCCGATACTGAGACCCGGATAGCGCGTGCCAA
TGCAATGCCAAGATCCTGCGGCTGATTAACGCGAAATGCTGCTTTGGCATACGGTTTTGC
CGCATTCATTTGGTCCAGCTCTTCATAATCACCTTGCTGGAGATCGACGATCGCGCGGTC
GCTGGAGCCGCTAATCATGATCATCGGAAAACCATTTACCGTTGCATTGGCCAATGCAGT
CAAACCGTTGAGGAATCCTGGCGCAGACACTGTCAGGCAGATCCCTGGTTTTTGGGTAAG
AAAACCGCTTGCTGCAGCGGCATAGCCTGCCGACTGCTCATGACGAAAACCAATATAACG
AATGCCTTCCGCCTGGGCATGGCGCGCCATATCCGTCACAGGAATACCTACAACACCATA
AATAGTGTCAATATTATTCTGTTTTAATGCTTCAACGATGATATGCATACCATCTGTCAT
TTGAAGTTGATCTGACATGATTAATAACCTCGAAATTTTTATAAATTGGGAGCCAGAAGC
CCCCGTTAATATCAGATGGCGTGGTTTTGCTTCATTGCAGCAATTTCATCGTCGCTATAA
CCCAGCTCCTGCAATACAGCAGCGGTATGTTCACCTAATAGCGGAGCAGCTTTAATATCC
GGCGTAAAGGCAGAGAACTTCATTGGACAACCAACTGTCAGATATTTTCCACGCAACGGT
TGTTCCACTTCGACAACACTGCCACTTTGGCGCAACGAGGGATCAAGTGAAATTTCTTTC
ATACTTAAAACCGGTGCACAAGGAATATCAAACTGAGTCAAATAGGCCACAGCTTCATGT
TTATCAATAGTGACAGTGTATTTTTCGATTTCAGCAAAAATATCGAAAATATGTGGCTGT
CGGGCATGGGCTGTACTGTATGCCGGATCGGTAATCCATTCTGGTTTGCCGATGGCTTTA
CAGGTGTTTTCCCAGTTTTGCTCCTGAATAGTGAAATAAATATAGGCGTTAGGATCGGTT
TCCCAGCCTTTACATTTCAGGATCCAGCCAGGCTGACCGCCCCCACCTGCATTACCACCG
CGGGGAACTGCATCACCAAATGTGCCATTCGGATACTGCGGGTATTCTTCCAGATACCCC
AACTTATCGAGACGCTGCTGGTCGCGTAATTTCACGCGGCAAAGGTTCAACACGGCATCC
TGCATTGACATGGTGACTCGTTGCCCACGCCCCGTTTTTTCGCGATGCAGCAAAGCAGCA
AGTAAACCGATCAGCAAATGCATTCCGGTGTTGCTGTCACCCAACGCTGCAGCGCTTACC
AGCGGCGGACCGTCCCAAAAACCTGTAGTAGATGCCGCGCCACCCGCTGCCTGAGCAACG
TTTTCATAGGCTTTTACATTCACATAAGGCGAACACTCATCAAACCCTTTGATCGAACCA
AAAATCAGACGTGGATTGATTTCTTGAATATGCTCCCAGGTGAAGCCCATATGATCAATG
GCCCCTGGATGAAAGTTCTCGACTAAGATATCAGCTTCGCGGATCAGCTTTTCCATTACC
TCTTTGCCTTCCGCTGTTTTGGTATTTAATTCAATAGAACGTTTGTTACTGTTAAGCATG
GTGAAGTAAAGCGCATCGATATCGGGAATATCTCGCAGCTGGTGACGCGTTACGTCACCA
ACGCCGGGACGTTCAATTTTAATGACGTCAGCGCCAAACCAGGCCAGCATCTGAGTACAA
GATGGGCCAGATTGCACACCGGTGAAATCGAGAACTTTAATTCCTTGAAGTGGAGTTGAC
ATAGCAATACCTATTAGTTAATTAAATATGTGTTAATTTAGCGTTTATTTAAGGCATAAC
GCCTCTATAAATAATCTGCAAAATATCGTCGTAGCTGCACTCGATATTTTTAAATTCCTG
TATCAAGTGCTGAAAATCATTTCATCGCCACTTCCAATTCCTTTCTGCATGGTAAGTAGT
GAGGACGAAAAGAAGAATATAATAAATATTGGTTCGCGGTAATCAGAGAGAGCCGTGACA
TTTGTGATGTTATTCTTACAACTGTAAGAAGTGTCAGTGATTTACAAGTAAGGTTATGAT
TACACTATTTAAAGCGTACCATAAAATATAACATAATAAATGATTTGTGATAACATGGGA
TTATTGCGGTTTACTTTGAGGAAGATAAAGTGCGAGTTTATAGAACCGCGAGCGCCAAAT
AATTTTATGACCACAACCTGTCGTATTGTGGTCATAAAAAATTGTCGGCTGGAGGGAGTT
AAATCCTTTACCTCAATATATTGCCTGTCAGGTTTAGTTCACAAACAGTGCTTCGCTATC
GACGATGATTCCATCTTCCGCACCTTTAAGCGCCAGGTTTGCCTCGTAGTATTGCTTTTT
ATCAAGCAGTTTCTGTGCATCAGCAAGTGCATTACGAGTCTGTTTAAGCGGCATCAAATA
TTGGTTTTCCATTACACCAACACCGGCCAGGCGAAGCTCTTCCATTGCACCCTTTTTATC
CCCTTTCGCCATTTTTTCGTTGGCAATTTTTATCGCGGCTTCTTTTTCGGGGGTTGCTAC
ATAACTCTCAGAAATTCCGACAGATGCATTAATGACAATATATTGGTCATCATTGACGTT
GGTCTTTTTACCTGGTTTAGCGAACTTTGCCCATTCGGTACTATCATCTGACAGCAAAGC
GGAAGCTTCATTGGTCAGTTCTTTTGCCTTTTCCGGATCGCCATGAAACAGAGCCAGGCG
CGCTACCTGCACGTCACGCATCGCATATAAACCTTGTTCAGAGATACGCTCTGCTGCTGC
CGTTTTCTGGGTTTGCTTAACTTGCTGAGTTTGCTGTTGTGCCGCTACCGGTGCATTATC
AGTAGCCCATACAGTTGAAGATGCCAGAATTGCTGTGACCATCGTAGCCATAATTAAACG
TTTCATACTTACCTCATTCTTTAACAGTTTTAGAAAACGCCGCCATCATATTGGGTGAGC
ATGAAATGAGAAATCAGAGAGCAACGGTCATTTTGAAAGGGTTATCTTACAACTGTAGTT
ATTATCGCAAAGCCGCTTTTAGTCTTACAGTTGTAGGAATCTGCTTCCTGTCGCAGAGAA
CTATTCTTATATACCACAAAGATATGTCATTTATTATATCGATGTAAATACTGATTAATT
AAATATAAATACAGCCATAACATCGTAGGTTTTCAGTGAACCATTTTCAGGATATTTTCT
ATGAAAGTAAACTTAATGCTTTTTAGCTTATTTTTATTTGTCTCTATTATGGCATGCAAT
GTTTTTGCATTTTCTATTTCTGGTGGTGGTAGTGAGGCGAGCTATAAAGAGACAGAAAAA
ACGTCAGTGATGACGACAACGCATTCTACAAAACTTCAGCCATCACAGGCGATTTTGTTT
AAGATGAGAGAAGATGCACCACCATTAAACCTCACAGAAGACATCACGCCTACTTATCCG
ACAAAGGCGAATTATCTCATTCATCCTTTGCGATAGCGTCTGTCACCTGGCAGGTGAACA
ATCATGTCTGATGCTGATGTGAACACCTGCCCAAATGAGCCATCCTGACCCACTATCGCC
TGCCATACCCCACCATAAAGCGAATCATCAAGCCACAAGCCGGGGCAAGAAACATAAATA
TCCCCGTCACCAGTTCATTACCGCCAGTTAACCACATGGTGAAGTAATAAATGAGTGCAG
CGAGGATCACCATGCCGAAGAAAGAAGAGATCGCCGATACCATGTTCAGTACCTGACCGA
TGTATCCGCTTACGCAGACAATACACAGGGCGAGAAACATCCATAAATAAATCATAGCTC
AACCTCCTGCCGCGCTAAAAAACCTGTAACTTCAGTCACTTTAATAGTAAGACAATCCTT
AACCTCTGGCAATTTTTGCTAAGCATCAATGAAAACAGCATGTTAAATGCAAGACTGTTG
TGTACGGAAAAATATTTACTTTGCACGATTAATAATCAGTAGCTGAAAGCAGTCAGCGAG
TGATAAAGTACAGATACCGCATTCATGCTCCTCGTGGTTATGTCCTGACTAGTCTTTACA
CTCTTTACAGGAACCATTGTCGTACATGATGGCCTAATCAATTGAGTGTACCGCTGTCGA
CATGGAATCTTCTGCGATACAACAATTCGTATCTACAGAAGGTAACTATGTTTCCAAAAT
GCAAATTTTCCCGCGAGTTTCTGCATCCTCGCTACTGGCTCACGTGGTTTGGGCTTGGTG
TACTCTGGCTTTGGGTACAGCTTCCTTATCCTGTTCTCTGCTTTCTCGGCACGCGTATCG
GCACAATGGCGCGACCATTCCTGAAACGTCGTGAATCTATCGCCCGTAAAAACCTGGAAC
TTTGTTTCCCGCAGCATTCTGCGAAAGAGCGCGAGAAGATGATTGCCGAAAACTTTCGTT
CACTCGGCATGGCGCTGGTAGAAACCGGCATGGCGTGGTTCTGGCCCGACAGTCGCGTAC
GTAAATGGTTTGATGTTGAAGGGCTGGATAACCTCAAACGCGCACAACTGCAAAATCGTG
GCGTGATGGTTGTCGGCGTCCATTTTATGTCGCTGGAACTGGGCGGCCGCGTGATGGGAC
TGTGCCAACCAATGATGGCTACCTATCGTCCACATAATAATCAGCTGATGGAATGGGTGC
AGACCCGTGGGCGCATGCGCTCTAACAAAGCGATGATCGGCAGAAATAATCTGCGCGGCA
TTGTCGGTGCACTGAAGAAAGGTGAAGCGGTTTGGTTTGCTCCCGATCAGGATTATGGTC
GTAAAGGCAGCTCCTTCGCGCCGTTCTTTGCGGTAGAAAATGTCGCCACAACCAATGGCA
CCTATGTCCTCTCCCGTCTCTCTGGCGCAGCCATGTTGACCGTAACGATGGTAAGAAAAG
CGGATTACAGCGGATATCGTTTGTTCATCACCCCAGAAATGGAAGGCTACCCGGCAGATG
AAAATCAAGCCGCTGCCTATATGAACAAGATTATCGAGAAAGAGATCATGCGCGCGCCGG
AGCAGTACCTATGGATCCACCGTCGCTTTAAAACGCGCCCGGTGGGAGAATCGTCGCTAT
ACATTTAACAAACTGCTCTTACTCTTTCCCTCCTCAAATCAGCCATAATAACCTCATGGT
TTTTATGGCTTTTTTCTTAAGGTTTTTTCCTTCGCTGAATCTCTAATTATTACCGTCAGA
AATTAAACTGTCGCCGATATGAGACACCTGTAAGTTACTAAAAGTAAATAAGAAAATGCC
TCTTGTCTCGTTTCAGTTTTAGGCGTACATTAGCGCCGTCTCGAGCAGTTTAGCTCAGAA
TTCTGGGGTGATGCCCACGGTAAAATACAGGGCTTTTAAGGTCGTTTTGCCCGGTGTCAA
CTCACTGTATCAGGTGTAATGAAGTCATTCAGGCGTAACAGTAATTACGCGGAGAGATGT
AAAGTGAAATATTTCTTTATGGGCATTTCTTTTATGGTCATCGTTTGGGCCGGTACTTTT
GCCCTGATGATCTAAAAGCAAACTGTGCAATGAAAAACAGGAGCCATCAGGCTCCTGTTT
GCATTTTTGAGGTCGGTGTTTATTCCGCGTTTTCGTGAATATGTTTGCTGCTGGCGGGTA
GTAAACCATCGGCACGGAACATCGCTTTAATCCCACGAATCGCCTGACGAATACGGTCGC
GGTTTTCAATCAGTGCAAAGCGCACATGCGTGTCGCCGTAGTCGCCAAAGCCAATCCCTG
GAGAGACACAGACCTTCGCTTCGTTAAGCAATTTCTTGGCAAATTCCAGCGAGCCCATGG
CAGCATACGGTTCCGGGATTTTCGCCCAGACATACATCGAAGCCTTCGGCATTTCGACCA
TCCAGCCCGCTTCATGCAGCCCTTTCACCAGCACATCGCGGCGGCGTTTGTACTGTTCGG
CAATATCGCGCACGCACTGTTGATCGCCCTCCAGCGCCGCAATAGCCGCCACCTGCAACG
GCGTAAAGGTGCCGTAATCGTGATAGCTTTTAATACGTGCCAACGCGCTGACCAGCGTTT
TGTTACCGACCATAAAGCCGATACGCCAGCCCGCCATGTTGTAGCTTTTCGACAGCGTAA
AGAACTCGACCGCCACGTCGCGTGCACCTGGCACCTGCATGATTGACGGCGCTTTCCAGC
CATCGTAGACGATATCGGCATAGGCCAGGTCGTGGACCACCAGCACATCGTAGCGTTTAG
CCAGCGCCACAACCTTCTCAAAGAATTCCAGTTCCACGCATTGCGCGGTTGGGTTTGACG
GGAAGCCGAGGATCATCATCTTCGGTTTCGGATAACTTTCACGAATGGCGCGCTCCAGTT
CATTGAAGAAGTCGACACCTTCCACCAGCGGCACTGAGCGTACCTGCGCCCCGGCAATCA
CCGCGCCATAAATATGAATGGGGTAACTTGGATTCGGCACCAGCACTGTGTCACCGTGAT
CCAGTGTCGCCAGCATCAGATGCGCCAGGCCCTCTTTCGAACCAATAGTGACGATGGCTT
CTGATTCCGGGTCGATTTCAACGTCGTAGCGATCCTGATACCAGCGGGAAATGGCGCGAC
GTAACCGCGGAATGCCGCGTGAAGTGGAGTAACCATGCGTGTCCGGGCGCTGGGCCACCG
TACATAATTTTTCGACGATATGCGGCGGAGTCGCACCGTCCGGGTTACCCATACTGAAAT
CGATAATATCTTCGCCGCGCCGACGCGCAGCCATTTTCAGTTCAGCGGTAATGTTAAAAA
CGTAGGGCGGGAGACGATCAATACGCGTAAAGCGACGTTCAGGGCGAGTGTCAGCCATAA
TTTCCTCAGATTAACGTTAGCGCCCGGACCGTCCGAGCGACGTCGCCACGATGGTGGCTG
TTTTGAAAATAGCCTGATTAATTTCTGTCTGTCCAGCGTTTTAGAACATTTTTATCAATG
GCTTTAAATGAGGAACTCCACTTCAAAAACAGGAAATTTATCTACGCTAACAAGAAAATT
ACCACTCATTTTATTAACATTATAATTTCAATAAATTTACCAAACGGATGTACATTATCA
AGAGATGCATTGCTAATAGACCATTTATCTTTCAATCCCCTTTTAAAATTGTGGTTTTTC
CTCAAAAAAGGCCTGCTGGTCATCAGCCTTCAGGTTACCTATCATAGAGGTTTAATCCTT
ATTCAGAGTCACCCGTGCACGAAATATTCAACATGCTGCTGGCGGTCTTCGATCGGGCCG
CGTTAATGCTTATCTGCCTGTTCTTTCTCATCCGTATCCGCCTGTTTCGCGAACTGTTGC
ACAAGTCAGCGCACTCCCCAAAAGAGTTGCTCGCCGTTACCGCCATTTTCTCGCTGTTCG
CCCTGTTCAGCACCTGGTCCGGCGTTCCCGTAGAAGGCTCGCTGGTGAACGTACGTATTA
TCGCGGTGATGTCAGGCGGGATTCTGTTTGGCCCGTGGGTGGGCATCATTACCGGCGTGA
TTGCGGGTATTCATCGTTATTTAATTGACATCGGCGGCGTGACGGCGATCCCCTGCTTTA
TCACCAGCATTCTGGCGGGTTGTATATCGGGCTGGATCAACCTGAAAATCCCCAAAGCAC
AGCGCTGGCGCGTCGGTATTCTCGGCGGCATGTTGTGTGAAACGTTGACCATGATTCTGG
TGATTGTCTGGGCACCAACTACCGCATTGGGGATCGATATCGTCTCTAAAATCGGGATTC
CAATGATCCTCGGCAGCGTCTGTATCGGCTTTATTGTGTTGCTGGTACAAAGTGTTGAGG
GAGAAAAAGAGGCCAGCGCCGCGCGGCAGGCCAAGCTGGCGCTGGATATCGCCAACAAAA
CGCTGCCGCTGTTTCGCCATGTCAATAGCGAGTCATTACGCAAGGTCTGCGAAATTATCC
GCGATGATATTCACGCCGATGCGGTGGCGATGACTAATACCGATCATGTGCTGGCCTATG
TTGGCGTGGGTGAACATAACTATCAGAATGGCGATGACTTCATTAGCCCGACTACCCGTC
AGGCGATGAATTACGGTAAAATCATCATTAAAAACAATGATGAAGCCCACCGCACACCAG
AGATTCACTCCATGCTGGTGATCCCATTGTGGGAGAAAGGCGTTGTGACCGGAACGCTGA
AAATTTACTACTGCCACGCGCATCAGATAACCTCGTCATTACAGGAAATGGCGGTGGGTC
TGTCGCAAATCATCTCCACGCAACTGGAGGTGTCACGCGCCGAGCAGCTGCGTGAAATGG
CAAATAAGGCAGAGCTTCGCGCCCTGCAAAGCAAAATTAATCCCCATTTCCTGTTTAACG
CTTTGAACGCTATTTCATCGTCAATCCGCCTGAATCCGGATACTGCTCGCCAGCTGATCT
TTAATCTGTCGCGTTATCTGCGCTATAACATTGAATTAAAAGATGATGAGCAAATCGATA
TCAAAAAAGAGCTGTATCAAATTAAAGACTATATTGCCATTGAGCAGGCCCGCTTTGGCG
ACAAGCTGACGGTTATCTATGATATTGATGAAGAGGTGAATTGCTGCATTCCCAGCCTGC
TGATCCAGCCGTTGGTGGAAAACGCCATTGTCCACGGTATCCAGCCTTGCAAAGGTAAAG
GCGTTGTCACCATCAGCGTTGCAGAGTGCGGTAATCGGGTACGTATTGCGGTGCGAGATA
CCGGGCACGGCATCGATCCAAAGGTGATTGAGCGGGTCGAAGCGAACGAAATGCCGGGCA
ATAAAATTGGCCTGCTGAATGTCCATCATCGCGTGAAGTTATTGTATGGCGAGGGGCTGC
ATATCCGCCGCCTGGAACCAGGAACGGAAATTGCGTTTTACATTCCTAACCAACGCACCC
CTGTCGCCTCACAGGCTACGTTATTGCTTTGAGCCGGAGTGATATTGTGAAAGTCATCAT
TGTTGAAGACGAATTCCTGGCACAACAGGAACTGAGCTGGCTAATTAAAGAGCACAGCCA
GATGGAGATTGTCGGCACCTTTGACGACGGTCTGGACGTGTTGAAGTTTTTGCAGCATAA
CCGCGTCGACGCCATTTTTCTGGATATCAATATTCCGTCGCTGGATGGTGTGTTACTGGC
ACAAAACATCAGCCAGTTCGCCCATAAACCGTTTATTGTGTTTATCACCGCGTGGAAAGA
ACATGCGGTAGAAGCGTTTGAACTGGAGGCGTTTGACTACATTCTCAAACCGTATCAGGA
GTCACGCATTACCGGGATGCTGCAAAAACTGGAAGCAGCCTGGCAGCAACAGCAGACCAG
CAGTACGCCTGCCGCGACGGTAACGCGTGAGAATGACACCATTAATCTGGTGAAAGATGA
GCGAATCATCGTCACGCCAATTAACGATATCTATTACGCCGAAGCGCACGAGAAAATGAC
CTTTGTCTATACGCGGCGTGAATCCTACGTAATGCCGATGAACATTACCGAGTTTTGCAG
CAAGCTGCCGCCATCGCATTTTTTCCGCTGCCATCGCTCATTTTGTGTCAATCTGAACAA
AATCCGCGAGATCGAACCGTGGTTTAATAACACCTATATTCTGCGGCTGAAAGATCTGGA
TTTTGAAGTGCCGGTCAGCCGCAGCAAAGTTAAAGAATTCCGCCAGTTAATGCATCTTTA
ATCGGGAACTTTCATGAAAGCACCAGGCTTGCCCGCCGATCAACAATTTTTCGCCGATCT
GTTCAGCGGCCTGGTGCTTAACCCGCAACTACTGGGGCGCGTCTGGTTTGCCAGACAGCC
TGCCTCATTGCCAGTGGGCAGTTTATGTATTGATTTTCCCCGTCTGGATATCGTGCTACG
CGGCGAATACGGCAATCTGCTGGAAGCAAAGCAGCAACGTATGGTGGAAGGAGAAATGCT
GTTTATTCCGGCACGCGCGGCTAATTTACCGGTCAACAACAAACCGGTGATGCTGTTAAG
CCTGGTGTTCGCACCGACCTGGCTTGGCTTATCATTTTACGATAGCCGCACCACGTCGTT
GTTGCATCCTGCTCGCCAGATCCAACTTCCCAGCCTGCAACGCGGCGAAGGTGAAGCAAT
GCTTACTGCCCTCACCCATCTTAGCCGTTCGCCGCTGGAGCAGAATATCATTCAGCCGCT
GGTGTTAAGTTTGCTGCATCTTTGCCGTAACGTGGTGAATATGCCGCCGGGCAATTCGCA
GCCGCGCGGCGATTTTCTCTATCACAGCATTTGTAACTGGGTTCAGGATAATTATGCCCA
GCCGCTCACCCGTGAGAGCGTGGCGCAGTTTTTTAATATCACGCCAAATCATCTGTCAAA
ACTGTTTGCTCAGCATGGAACAATGCGTTTTATCGAGTATGTTCGCTGGGTACGAATGGC
AAAAGCGAGGATGATTTTGCAAAAATATCATCTGTCGATTCATGAAGTGGCGCAGCGTTG
CGGGTTTCCGGATAGCGACTATTTTTGTCGCGTTTTCCGGCGTCAGTTTGGTCTGACGCC
GGGAGAGTACAGCGCCCGTTTTCAGGGCTAACGTCAGAAGGTTAATTCTGTTTCCAGCAG
CGTCAGGATGCTTTGTGCATCTTGCGCGGCAAACAACGACTGGCGGAAGTTTTTATTCAC
CAGTTTACGCGCCAGCTGCGAGAAGACTTTCACATGATTCATCCCTTCGTTAGCGCCCAG
TGTCAGCATGATCACCAGTTCGACTTCGCCCATTTCTGACTGCCAGTCAACCGGTTTCAC
CAGCCGGGCAATGCTGATACTGGAATGACGGATCCACTGAGATTTGGTGTGCGGGATCGC
TACGCCAAAACCAACGCCTGTGGTAACAATCTCTTCCCGCTGCCAGACATCCTCTTCCAG
CTCGAACGGATGTTCAGTGCGCCCGTTAACGCCGAGGTTACCGCACAGGAACTGGATCGC
CTGCTCTTTATTACTAAAGGACTGATCAACAAAGATATTCTCTAGTGCCAGCAGTGGGCG
AACGTCTTCTTCCGGCGTAAACGCGGTAAGTAACGCTTCAATTTCCTGCGCGCTGCGGCA
CTCGCACGCCTGACGCGCCAGTTCCCGACACGCCTCGCTATCCAGTTGACGAAGCTGGCT
TTTCACTGCCGGAATACGCGGGCTACTCATGCTTAGCTCATCCAGGCCCAGCCCTAGCAG
TAGCGGCAGATAACGACTTTCACCGCCCAGTTCACCACAAATACCTACCCATTTGCCGCG
CTGATGCGCAGCGGTAACAATCTGCTGCAACATGCGCAGGAACGATGGCGTAATCGGGTT
ATACAGCGGCGATACGCGCGGGTTATTACGATCGACTGCATACAGATACTGGGTCATATC
GTTAGAACCGATACTGAAGAAATCGACCTCATCGCAGAAGTGGTCGATGATGTAGCACAC
CGACGGCACTTCCACCATGATACCCAGCGTAATCGTCTCTGCATGACGCAGGCCATCGCG
CTTAAGCTCAACGATCGCTTTTTGGATCTCACCCTTCACCCATAAGATCTGATCGAGACT
GTGGACCATTGGGATCATCAACTGGGCGTTGCCGAAACTGGCAGCGCGCAAAATCGCCCG
CAATTGAGTGCGGAACAGGCCAGCAAATTCCGGGTAAATACGTACCGCGCGATAGCCGAG
GAACGGGTTCTCTTCCTGGGGAATGTTGAGGTAAGGAATGCTTTTATCGCCACCGATGTC
CATCGTGCGGAAGATAATCGGCTTGTCGCCCGCCGCCAGTAGCACCTGCTGGTACGCTTC
AAACTGTTCCTGCTCGTCCGGCGCGCTGTCGCGATCCATATAGAGCATTTCGGTACGAAA
CAGCCCAACGCCTTCCGCGCCGTTAGCAAACGCGCCTGGGGCTTCCAGAGCGGTGCCAAT
ATTCGCCGCAATATCAATACGTTTGTTATCACGGGAATAGGCCAGCTGCGCGGCAGCTTG
CGCCTGTTGTTTTTGGCGTTTATCCGCCAGCGTCTGCGCGACCTGATAATAACCGCTCAC
CGCGTCATTCGGGTTAATCGCCAGCACGCCGCACTGGGCGTCAAGCACTGCAGGTTGCCC
GGCATAACGGGCAATCGCATCCAGCGGCAGTCCGCTCAGTACCGGGATCGCCGAAGCGCG
GGCCAGGATCAGGGTATGCGAGGTGCGCCCGGTTTTCTCCAGAATCATGCCCGCAAGATT
TTTTAAATCGAGGCTCAAAAACTGGCTTGGGGTTAAATCTTCAGCCACCAGAATGGTCGG
TTTTTCAAGCACCAGATTATTGCGCGGTTTTAGTTCCGGCCAGGTGATATGCAGCAACTG
TTCGCTGATATCGCGAATGTCGCTGACCCGCTCGCGCAGATAATCGCTGGCAGAAGCAGA
AAGTTTGGCACAAATCTGCTCCATATTGCTGATGATCGCCGCCCCCAGCCCCTGATGCTG
TTCTGCCATCAGGTGACGGATATTGCCTGCAAATTCATCATCCTGAATCAGCGACAAATG
GGCGCTGAGGATAGTTTTGCTTTCGCCGTCACGCTCACGCAATTGCTGGTTCAGTTGCTC
GGCAAGCGTTGCCAGACTGTGCTCCAGTAGGGTGGAATCTTGCGCACTGGCCGGTATTGC
CCGATAACTGTCGAGGCTGTCGCTCTGTAACAGGGTCAGTGTACCCACGCCAACGCCGCT
TGCCAGCACGTTGCCGTACAGTAAATCCGGGTTCAGGCGGCTTAATGAACGCGGCAGCGG
ATGCGCCGTCAGTTCTGCCAGCGTCGGCTGGATGCTATCGCTGTCGATAAAGCGCACCTG
GATATACTCTTCCAGCACTCGCCGCGCCTGCTCTTCATCGCTACCGCTAATGTTCAGGCT
GCAACTGTCATTAAATAAAGTGCCAGTGCCAATCAGCGCCAGCGAGCTTTTCGCATCGGC
CTTTGCGTTCTGGCGATGGTTAATAAAAGTGATTTCGCTTTGCCACTGGCTGCACTGCTC
TTTAAGTTCCCACGCCGGACGAGCATGTAGACCGTTAGGCAAAGGACAGAGAAATTGAAT
CGTTAACATAACCGCTCCGGGTTAATCAGGAGATCATCTGAAATCCGTCAGTTGAACAAC
CGTCTCACGCGTAAGACGTTGAATAAGGGCAGATAAAAGTTGCTGCATCTGCAAAATGTC
ACGGCAATCGGCAATCGATGCGGCGCAATGTCCGTGGCGGGTGGCAGGCCCCATCACCAC
TGTGGGTACGCCAGTGCCGGTTAAGTGCACCGCCCCACCGTCCGTGCCACCGTTGCTGAA
CATATCCGCCTGCAACGGCACGCCAATTTCTGCCGCCACGGTTTCGATCCAGGCGGTAAG
TTTTGGCGGCGCAATCAGCGATTTATCGCTTAACACCAGCATCGGCCCGTTACCAATCTG
ACGATGGTTAGCCGCGCCATAATCAAAGTTTTTCGCCCAGCAGGCGGTATCAAGCACAAT
GGCGACGTCCGGCGACACCGCGCGGGTGGCAGTTTGCCCACCGCGTAATCCCACCTCTTC
GCTGGAACTTGCCACCAGCCACACCTCCGCAGGCAGTTCGGCGTCGTGCAGCTCACGTAG
TAACGTCACCAGCAGATAGCAACCGAGGCGATCATCAAAGGCTTTCCCCATCACCCGCTG
GTGAGGGAGAACCTGAAAAGTTGTATCAAAGGTGACGCGATCGCCTGGACGAATTCCCGC
CTGCATCACTTCGTCATACGAGCGCGCACCAATGTCCACGCGCATGGTGCTGACGTCATT
CCCCTGCCGGTCGCCGTCAAGCAGGCCGGGAATTTTGCACTCTTCACGGGTAGTGATACG
CACCGACTGAAGCTGGCGGGCAGCCATGCGTACATTGCCAACCGGCAACACATCGATCGC
CCCTTCGCGGGAGATGCTGCGCACCATAAATCCCACTTCGTCCATATGCGCACAGATCAT
CACCTTCGGACCTGTCGACTCATTGAGTCGGATCAGCACCGATCCCAGCCCATCAAATCG
CACTTCTTTTTGCAGGCGATCCGCTTCTTCCAGCAGGATCTGCCGTACTTCCTGTTCCGA
GGAGGCGATCGCATCTGCCTCGCTCAACGCTTTTAATAACGATAAATCCATTATGCCTCT
CCCGTGAGCAACACTGTTTTCGGCATGGCGTAGAGCACTTCTGCGCCTTGCGGGGTGACC
AGCACAACATCTTCGATGCGCACGCCCCCTTGCCCTGGCAAATAAATCCCCGGCTCCACG
GTCAGTAACATGCCTGGCTGTAGCGTCGTGGTGTCCCGCGGTGAAAAACGCGGATCTTCA
TGAACTTCAATGCCGATAGCATGACCGGTGTTATGACCGAAATAGTCGCCATAACCTGCT
GCTGTAATCACCCGGCGCGCGGCATCGTCAACCTGCTGGCAGCGCACGCCGGGGCGAATT
ACAGAGATTGCCGCGAGCTGTGCCTGCAGGACAATCTGATAGACGTTAAACAGCGGGTGA
GATTCGGCGCTCACCCCTTCGCCATTCACCAGCAAGGTGCGCGTCATATCAGAGCAGTAG
CCCTGATAGAGCGCACCGAAATCGAGAGTGACAAACTCGCCCGCTGTAACAATCTTGTCG
CTGGCTTTGCCGTGCGGCAGCGCCCCACGCCAGCCGCTGGCGACAATGGTATCGAAAGAG
GCTTTTTCTGCGCCCTGCTGGCGCATAAACCACTCCAGTTCAGCGGCTATCTCGCGCTCG
CTCATCCCCGCCTGAATAAAGCGGCGAATATGCTCAGCACCGCGATCGGCAATCCCACAG
GCGAGGCGGATTTTCTCCACCTCCTCTGGCGTTTTGATTTGCCGCAACACATCCGGCGTG
GCGCTAACCAGTTTCGCATTGAGTTCGGACTGCCAGCGGTGCGCGGTTTCCCAACTCACC
TGCTGGCCTTCAAAACCGAGCGTTTGCAACTGCTCATCGGCAATGATTTGTCTGACGATG
GTGGCAAGCGTGTGCATCGCGTCGAGCAAATGCAGCTGGTAACCTTGCGTGCGGGCTTCT
ACATCCGCGTAATAGCGCGAATCCACCAGAATGTGCGCACTTTCACGGCTAATCACCACA
TAACCTGATCCGGTGGAGATCCCCAGATGCGGCTGTTTGTTCTGCCGTGAGGAGAGAAGC
ACCGCATCCAGTTGTTGTGCCTTAAGCCAGTCACGCAGCGAAGCGAGTAATGTCATCAGG
ATTGTCCTTCTTACAGGCTATCGATTAACAATTTACCTTTGCGGAACATCATCAGACGCA
AGAACACCACCATCAGCGCAGTAATGATTGCTCCCAGCGCAATCCCCGCCATATAGACAC
CCAGATTAGTGACCAGCGGCCACGCCCAGATAGCGGATTCCGGGAACCATTGCACTGCGC
CCAGCCAGACTGCGGCGGTTGAGCCGACAATCGCGCCAACCATATAGGACGGAATGGCGG
TGATAGGGCTTTCCAGTGCAAACGGAATCGCACCCTCACTGATCCCCATAAAGGCAAGGA
ACATCGCGGTCTTACCCTGCGGATAAAGTTGAGCGTTGAACAGACGTTTGCCGGTTAAAC
GACGGTCAATAATGGTTGCCAGACCCAGACCAATCGGCGGAATAACGATAGCGATAGAAC
GTGCGGTGACCGGTAATACGTGGTCAGTGGTAAAGCTGAAGGCAACGAAACCTGCCGCTT
TGTTGATCGGGCCACCAAGGTCGATTGCTGTCGCCGCGGCGATCCCCATTGCGTACATCA
GCGCGCCCTTCTCACCTGCTGCGGTTAGCACGGTACGGATACCGCCGTTGATCCAGCCAC
CAAAGGGGGTGATGACGTAGTACATCGCCAGCATGACAAAAATGGCGGAAAGAATCGGTA
GCAAAAATGTGGTTTTGAACGCTAACAGGAAATCCGGTAACTGGATTTTCTGGTTCATCC
ACTTCACGAGGTAACCCGCAACGATAGATATAATCAGCGCACCAATGAAGGTGGACGGCA
CCGGCGAAGAGGTCGCCCATTGCATAATGCTGGGATCGAAGTTCAGCAGTTGCGTCGGCT
GGGTAGACATCAAGCCGCCGATAAAACCAGCCGGGAACGCCAGTTTGCCACCGATAGAGT
TCGCCACAAAAGCAGCAAACATCGGAATGGCAAAACCAAACAACACGCCACCGAAGGACT
GCGACAGCCAGGCAAATTTAAGTAAGGAGAGGTCGAAACCGGAGAATTTCCCGCTATTAA
GAGCATCCATGATGCCGATATCAGCAGGAATTTTAAGCCAGCTATAAGCAATCAGCTGAC
TGAAAGCGAGGATCACACCGCCCATAATTAAGGTCGGCACCATGCGTGAAATCCCTGACA
TCACATGCTGCGGGAGTTCACCCCAGAAGCTGGATTTAGAGGCCTGCGGATTCTTAACTG
CCGCTGCCGCACCGGATGCGCCATGCACAACGGTTGCACTGCGTTTTTTAATGGCCATAA
CAATTATCCCTGTCGAATATTACTGTTGTTCAGAGGCAATCATCTCTTCGATTTCTTTGA
TGATTCCTGCAGCGTTTTTAATTGCGTCCTGCAAAGTGATTTCATAAACGTCGCGTGATT
CGAAACGCTCGTTATCTTCCGGGGTAACTGCCACGGAGTGGATGATGATGGCCGCTTCGG
CGATATCCTACGCCGTCAGGCGATTCTGGATACCGTCCGCGCCCTGGGTTTCAATTTTCA
CTTCATAACCGGCTTCTACCGCCGCTTCTTCCAGCGCCTGAGCGGCCATAAAAGTGTGAG
CCAGGCCCATTGGGCAGGCACATAAGGCAATCAGTTTCTTACTCATCGTTAATTCCTCGT
TCAGTGATAGTTGACGAGTGAAATTATGAACGTGCAAAACAAATCGCCGTTACCAGACAA
ATAATGCATTTACTGGAGAATTAATCCCGCTGTACGGAAGTGTGACGCAGGTCGGCCTTG
TGAGGGGACACAAAGAAAAATTTAATTAACTGTATGATTTAAAAGATTATCGGGAGAGTT
ACCTCCCGATATAACAGGAAGGATTTAGAGAATGTGACCTAAGGTCTGGCGTAAATGTGC
ACCGGAACCGAGAAGACCCGGATTGTCATGGACGATGAGATATACCGGAATATCATGGAC
ATATTCCTTAAAGCGCCCTTTATCTTCAAATGCGGCGCGGAAACCAGAGGCTTTGAAGAA
CTCAAGGAAGCGCGGCACGATACCGCCCGCAATAAACACGCCGCCAAATGTCCCGAGATT
GAGCGCCAGATTGCCGCCAAAACGGCCCATAATGACGCAAAACAGCGACAACGCGCGGCG
GCAATCGGTGCAGCTGTCAGCCAGCGCGCGTTCGGTAATATCTTTTGGCTTGAGATTTTC
TGGCAGGCGGTTGTCGGCTTTAACAATTGCGCGATACAAATTCACCAGCCCAGGGCCAGA
AAGCACGCGTTCCGCCGAAACATGACCAATTTCCGCACGCAATATTTCGAGGATAATGCC
CTCTTCTTCACTATTCGGCGCAAAATCAACGTGACCGCCTTCTCCTGGCAAGCTTACCCA
ACGCTTATCGACATGGACCAGATGCGCAACCCCAAGCCCTGTTCCGGCACCGTAAACCGC
AATAGGCTTACCTTCTACCGGTTCTGCGCCACCAAACTGAATCAGATGCTCTTTTTTCAG
CATCGGGATCGCCATCGATACAGCAGTAAAATCGTTAATAATTTCCAGATGGCTAAAACC
GAGATTCTTTTTCATTTCGGCAATTGAGAACGCCCAGGTATGGTTGGTCATTGCCACCCA
GTCACCGGTAATTGGGCAAGCGATGGCAATACAGCCGTCTTTCACCTCGACCTTATGTTC
TTCAAGATAAACGCGAATGACCGCTTCGAGGCTGGGATAATCAAGCCCTGAATAGGTCTT
AGCCTGCGAGATTTCACCACTGGCAATATCACACAGAGCAAGACGTGCGTTGGTGCCGCC
CACATCACCGACTAATGCATACTTTGTCATTCTTCAACTGCTCCGCTAAAGTCAAAATAA
TTCTTTCTCACACTGTAAATACCTGGGGGCATAACAACAACGCCGGAAAGGCAGGCTCCC
TGTAAATATCGATCTGGGTCACACAATTACTTTATCGTTTCAGCACCAATTGCAGCGATG
CCTTTTTGCAAGCTGGGCAAACTAAGTATCTGACCCCGCATAAGGAATAGAACATGCTCC
ATCCGCGAGCCAGAACCATGTTGTTATTATCGCTCCCCGCCGTGGCAATTGGGATTACGT
CCAGTCTTATTCTGATTATGGTGATGAAAATCGCCTCGGTATTACAGAATTTGCTCTGGC
AACGACTGCCGGGAACTCTGGGGATAGCCCAGGATTCACCTCTCTGGATCATCGGTGTAT
TAACGCTAACGGGTATTGCGGTGGGGTTGGTTATCCGTTTCAGCCAGGGTCATGCCGGAC
CAGATCCCGCCTGTGAACCGCTTATCGGCGCACCGATTCCGCCCTCTGCGCTACCAGGAC
TTATCGTAGCATTAATTCTCGGTCTTGCTGGCGGCGTCAGCCTGGGGCCGGAACATCCGA
TCATAACCGTCAATATCGCCCTTGCCGTCGCCATTGGCGCTCGTCTGTTACCGCGCGTCA
ACCGAATGGAGTGGACTATTTTAGCCTCTGCCGGAACCATCGGCGCGCTGTTTGGCACAA
CTGTTGCGGCGGCATTGATATTTTCGCAAACCTTAAATGGCAGTAATGAAGTTCCGCTAT
GGGATCGTCTCTTTGCGCCGTTAATGGCGGCAGCAGCTGGTGCACTTACTACCGGATTAT
TTTTCCATCCTCATTTTTCACTGCCCATTGCGCATTACGGACAGATGGAAATGACCGATA
TTCTCAGCGGTGCAATTGTCGCGGCGATTGCCATCGCAGCAGGGATGGTCGCCGTATGGT
GCTTACCACGGTTGCACGCGATGATGCATCAAATGAAAAATCCGGTGTTCGTGCTGGGTA
TTGGCGGATTTATTCTCGGTATTCTGGGGGTTATTGGTGGACCGGTTTCGCTGTTTAAAG
GGCTGGATGAGATGCAGCAGATGGTGGCAAATCAGGCTTTCAGCACCAGCGATTACTTTT
TGCTGGCGGTGATAAAACTTGCCGCCCTGGTCGTTGCTGCCGCCAGTGGCTTTCGCGGTG
GGCGAATCTTCCCGGCAGTGTTTGTCGGCGTGGCATTAGGGTTGATGCTTCATGAGCACG
TTCCCGCCGTTCCAGCGGCAATAACCGTTTCCTGCGCTATACTCGGCATCGTGCTGGTGG
TAACACGCGATGGCTGGTTAAGTCTTTTTATGGCGGCAGTCGTTGTACCCAATACCACAT
TGCTACCGCTGCTCTGTATCGTCATGCTTCCGGCATGGCTGTTATTAGCAGGTAAGCCGA
TGATGATGGTCAATCGTCCGAAGCAACAGCCACCCCACGATAACGTTTAGCAAAAAATGC
TCTCCTTTATGATTTAAGAGTTATGGCGATGATACGGGGCTTTACCTCCCCGTAATATTG
CGTTAACAGGCCGCTGACGGCTTCGATCGTGAAGGAGAATAACAATGTTCAGGTCACTGT
TTCTGGCGGCCGCCCTGATGGCATTTACCCCGCTTGCGGCAAACGCAGGCGAAATCACCC
TACTGCCATCAATCAAATTACAAATTGGCGATCGCGATCATTACGGTAATTACTGGGACG
GTGGTCACTGGCGCGACCGTGACTACTGGCATCGCAATTATGAATGGCGTAAGAACCGCT
GGTGGCGTCATGATAATGGCTACCACCGTGGCTGGGATAAGCGTAAAGCGTATGAGCGTG
GCTATCGTGAAGGCTGGCGCGATCGTGACGATCATCGTGGAAAAGGCCGCGGACATGGAC
ACCGCCATTAAACGCATCCGTCAATGGAGCACAATGCCTGATGCGACGCTAGCGCGTCTT
ATCAGGCCTACAAACCAGCTCTTTAACGCGTAGGGCGGATAAAGCATTTACGCCGCATCC
GCCAATGGTGCCAAATGCGACGCTCATTCAACTACAATCCCAGTGCCGTTCCTACCAGTA
ACCAGATATTCAGCGCCACTACCAGCACCACAATCACCCAGCCTGTCTGTTTTACGCGTT
TACTGTTCACCAGATCGCCCATCAACTTGCTGTCACTGGTGAAAATCAACAGTGGAACCA
GCGCCAGGGCGATACCAAAACTTAACAGCACCTGACTCATAACCAGAATCCGTGTCGGAT
CTAATCCCATCAGAATGACGATAAATGACGGCAGCATGGTGACTGTACGACGCACCCACA
GCGGGATATGAAAGCGAATGAAGCCCTGCATCACTACCTGCCCCGCCAGCGTCCCCACCA
CCGTTGAAGACAGTCCGGCAGCAACCAGGCTTAATCCAAAGACCGTTGCCGCAGCATGGC
TTAACAGCGGTTGCAGCGTCAGATAAGCCTCATCAAGATCGGCAACACCAGTATGACCAG
AAAAGTGGAACGCCGCCGCAGCTGTAGCCATCATCGCCAGATTGACAAAACCGGCAATCG
TCATGGCGATAGCCACATCCCATTTGGTGGCGGAATAACGTTGTTGACGCGAACCGCCAT
GTAAATGCTGAGTGAGCGAAGAGTGCAAATAAATCACATGCGGCATAATCGTCGCCCCTA
ACACGCCCGCGGCCAGGAAGACCGCCTCCGAAGTAGGTAAACTCGGGATCACCATTCCTT
TACCCAGCTGCGCCAGGTTAGGCTGGGAGAAAATCAACTCGACAATGTAAGCAGCGGCAA
CAAACAACAGTAACCCGCCAATCACTTTCTCCAGCGGTTTTTGCCCGCGACGTTGCAGCA
TTAAAATAAGGAAAGTCGCGATCCCCGTCAGCACCGCGCCCTGCAACAACGAAACACCAA
GAATGAGTTTAAAACCGATCGCCGCACCAATAAATTCCGCCAGGTCGGTTGCCATCGCAA
TAATTTCTGCCTGAACCCAATAGAACCACACGAAGGGACGCGGGTAGTGATCGCGAATCT
GCTCCGCCAGATTTTTACCGGTGGCAATCCCCAGTTTGGCCGAGAGAATTTGAATCAGCA
TCGCCATCAGGTTAGCCCAAACGACAACCCACAATAACTGATAGCCGAAGCTGGCACCCG
CCTGAATATTGGTCGCAAAGTTACCGGGATCGATATAACCAATCGCCGCAATGAACGCAG
GTCCCATTAATGCGAGCCTCATCTTGCGCGCCGCCCGTCCGCTGCTACTCTCAACGCGAT
AGTTCGTCATCTTGTGCCTCTAAAACATAGCCGTTGCTATGTTTCATGCTACATCAAATG
AGAATGATTATCAAATTCATTTAAATGGGTTGTGATGATTTCTCTGATAGACCAGGATTA
TGACTACGAAAAGATAGATGACTCGAATGTTATGGTTATGTTTAATATTAGCACATTTAC
ATAACCTTCCGCTTCCATACACAACATAGCAGAAATGTATGACAGATCACTATTTTTGAA
GCTTGTCACAGGACGTCATTATAGTGTGTGTCAGATCTCGTTTTCCTTAACCATGTTACA
TAGAATGTGCACGGAAATTTAACCTGCCTCATATTTGGAGCAAATATGGACCGCGTCCTT
CATTTTGTACTGGCACTTGCCGTTGTTGCGATTCTCGCACTGCTGGTAAGCAGCGACCGC
AAAAAAATTCGTATCCGTTATGTTATTCAACTGCTTGTTATCGAAGTGTTACTGGCGTGG
TTCTTCCTGAACTCCGACGTTGGTCTGGGCTTCGTGAAAGGCTTCTCCGAAATGTTCGAA
AAACTGCTCGGATTTGCCAACGAAGGGACTAACTTCGTCTTTGGTAGCATGAATGATCAA
GGCCTGGCATTCTTCTTCCTGAAAGTGCTGTGCCCAATCGTCTTTATCTCTGCGCTGATC
GGTATTCTCCAGCATATTCGCGTATTGCCGGTGATTATCCGCGCAATTGGTTTCCTGCTC
TCCAAAGTCAACGGCATGGGCAAACTGGAATCCTTTAACGCCGTCAGCTCTCTGATTCTG
GGTCAGTCTGAAAACTTTATTGCCTATAAAGATATCCTCGGCAAAATCTCCCGCAATCGT
ATGTACACCATGGCAGCAACGGCGATGTCCACCGTGTCGATGTCCATCGTTGGTGCATAC
ATGACCATGCTGGAGCCGAAATACGTCGTTGCGGCGCTGGTACTGAACATGTTCAGCACC
TTTATCGTGCTGTCGCTGATCAACCCTTACCGTGTTGATGCCAGTGAAGAAAACATTCAG
ATGTCCAACCTGCACGAAGGTCAGAGCTTCTTCGAAATGCTGGGTGAATACATTCTGGCA
GGTTTCAAAGTTGCCATTATCGTTGCCGCGATGCTGATCGGCTTTATCGCCCTGATCGCC
GCGCTGAACGCACTGTTTGCCACCGTGACTGGCTGGTTTGGCTACAGCATCTCCTTCCAG
GGCATCCTGGGCTACATCTTCTATCCGATTGCATGGGTGATGGGTGTTCCTTCCAGTGAA
GCACTGCAAGTGGGCAGTATCATGGCGACTAAACTGGTTTCCAACGAGTTCGTTGCGATG
ATGGATCTGCAGAAAATTGCTTCCACGCTCTCTCCGCGTGCGGAAGGCATCATCTCTGTG
TTCCTGGTTTCCTTCGCTAACTTCTCTTCAATCGGGATTATCGCGGGTGCGGTTAAAGGC
CTGAATGAAGAGCAAGGTAACGTGGTTTCTCGCTTCGGTCTGAAACTGGTTTACGGCTCT
ACCCTGGTAAGTGTGCTGTCTGCGTCAATCGCGGCACTGGTGCTGTAAGACCATACATAA
AAAAGCCGGGGATAATTCCCCGGCTTTTTTACGCCTGTTAATCAGCTAATGGCTGCGGGC
GACCAATCAAATACCCTTGCAGATATTGCACCCCAAGTTTATGCAATAGCGCCTGCTGCT
GTGGCGTCTCGACAAACTCCGCGACCACACTCAATGACTTCGCTTTCGCCAGATCGGTAA
TTGATCTCACAATCATCGCATCCAGCGTGTTCGTGACGATATCTTTCACAAAGACGCCAT
CAATTTTGATGATATCAGCCTGCAAACGCTTTAACCGTTCGTAGTTGGCATATCCGGTGC
CAAAGTCATCAATCGCAATCCGGAAACCAAACTTATGCAGCTGCTCGATGTTATACATGC
TGCTTTCTGCGTTAGAAAACGCCTGCTCCTCGGTGATCTCGAGAATGACCGCCTGCGGGG
AGATGTGATAACGCTTAAACAGACGAATAATCCGCCCGGCAATATTCTTTTGCAGCAGCG
TGAGCGGCATTAAATTAACTGAAAATCGTGGGCCTTTTTTGTCGCAAGGGTGTGTTGCCA
GCCATTTCAACAAGGATTCCAGCACTTGCAAATCAAAACGCGCGCTAAGGTTAAACTGAG
CAATAAGGGGCAGAAACTTATCCGGGGTCATAATGCCGCCGTCATACTTCAGTCGCGCGA
GGATCTCATCATAACCTTCACCCTCTTTGTTGCGAATTGGCTGGGCGTAGAGCAGCAAAT
CACCCTGATCTAACGCCGTGCGAATGGTATTCAGCAATAGCACCTGTTTAGTGGTTTGCC
CGGAAACCATCTCCTCTCTGCTATCCAGCGCCAGCACATGATGATGTGCGCAGGATTGCT
CCGCCAACCAGCTTAACTGCCCCAACAAGGGTTGCAGGGTTTCCTGATTTCCATCAAAAT
GCCCCCAGGCAGCACCATAGCCCATATCCAGCCCGATATTGTTCCAGTGAATTTGCCGAC
TATTCAGGATGTTAACCATATGCTGGAGTCGCCCTTCCGTTTCCGGTCCACTCAGCACTA
ACAGCAGTTCACTACCCGGCAATTGATACAACTTTTCGTTTTCCTGCATCAACGGCAGCA
GCGTACGGTAAATTGAGCGGATACAGTGAACGCGCATCATTAAGCCGTAATGACGACTCA
TAAACTCAAGATTATCAATGCGCAGGCAACAAAAACTCTTGCCCGCCTCTTGCTCCGGCG
CTTGCTCCAACGCACGAAAGTTGGGTAGAAGCGTTAACGGATCGGTCAGCGCCTGCAAAT
GCCAGCGGCGGTTAAGCCATTCACTACGATGATAAATACGCACCATATAGAGCAGGCAAA
CACTAAAGGAAATCAGTACTGCGAGAATAAATGCCAGCGAATATTCGGTTAGTACCCCTT
GCAAAAAGTTCTGGTTATAATTCAGAAGGCAAAGCGTTGAAACAGCCCAGGTGAGATTTA
AAAACGGATAGCGAAGCTTACCGACACCGAGGGTAAAGATGATAAAGAAAACAGGTACCA
GGTAACCGGCAATAAAGTCATTTTCATACGGTGTGCACATCAGAAGTAGCAGCACGCTAA
GAGCTGCCAGCCAGCTTAAGGTAAATGCGCGTTTCTCTTTGCTCAACGACGGAGCGATAT
CCCTACGCCACAATATCTGTGCAAAGTGGGGACTTACAATCATGCGGGTGAGATAGTAAA
AAAGCATGTTGTAAATCAGCACTGCGGTGAAAAGGCTTAGCAAATCAACGACCGTGAAAA
TGGCATCCGCATCGCCGAAAAAGGTAGATATCTTTAGCGGAAAATCAAAGAAATTTCCCA
CAAGATACATGCTGCATTTGATGCCAATCGGCGCCACCAAACCAAGCCAGAACAGACGTT
GCCAGACGTATCGGCTGGTCAATCCATAACGCCAACGCGTCCCCAATTGCCAGCGTAATA
TTGCACAGGCACACAGGACTGCAAACGCCTGGCTGCCGATCATGACGGCGGTCTGTAAAA
AAGTGAGATGAAGGTTCCACAGATTGGTGCAAAACATCCCGCATAAAATGGGAACGACAC
CACGCCAGCCAAAGATAAACAAGATTGACAGCATTACGCACAGTGGCATCCACGCCAGAA
AGATATAATTGGAATGGATAACAGCAAGTGGCGAAATTAAACGGGATAGCTGAATAAGTA
CCACGGTGAGCGTAAACGCTAGTGTGAATATCTTGATATTTTTTATCAGGTTATGCTCCA
CAAACATGAGTACACTACTCTCACTGATCGGGGTTTTCAGGCACACAAATAATAAGTTTA
TTCGCATCGCGAAGCAAACAGGGGCCAGCCTGTTGCTGTTTTTTCAGTCAGTGATGCATT
CACTACACGGCACTGCCAGGATGTAGACTGTATTACAAAAGCGGCAAAAGGCAGAGACAA
AAAACCCCCGCTTTGCAGCGAGGGTTTGAAATTTGGTGGAGCTAAGCGGGATCGAACCGC
TGACCTCTTGCATGCCATGCAAGCGCTCTCCCAGCTGAGCTATAGCCCCACGAGTCGTTT
ACGTACCAAATTTGCTGGGTGCAAAATTTGGTGGAGCTAAGCGGGATCGAACCGCTGACC
TCTTGCATGCCATGCAAGCGCTCTCCCAGCTGAGCTATAGCCCCATCACGTAAAGCTTGT
CGAGTTGACGGGCGGCATCATATGAATTCCGCCCGAATGTGTCAACGGCAAATTGCCACG
TGTAGTTTCAATCGCTGAAAAATCAGGCAAATGAACAATTTTGGAAAACCGCTCGCATTC
AGTAGTTATTCATGTCACGGTTTCCTGTAAAGTGGTGTTATAAAATGAACTACTAATAGA
CCCACATACATTCAGGGAATTGTTATGTTCAAGGAGAGGATGACGCCAGATGAACTTGCC
AGACTGACCGGCTATAGCCGCCAGACCATTAATAAATGGGTACGCAAGGAAGGCTGGACA
ACGTCACCAAAACCAGGCGTCCAGGGTGGCAAAGCCCGACTGGTTCACGTCAATGAACAG
GTTCGTGAATATATTCGCAATGCTGAACGTCCGGAAAGTCAGGGAGAAGCGCCAGCCCTT
TCTGGTGATGCGCCGCTTGAAGTGTTGCTGGTGACACTGGCGAAAGAGATGACGCCAGTT
GAACAAAAACAGTTTACATCCTTGCTTCTGCGGGAAGGGATTATCGGATTGTTACAACGC
TTAGGGATTCGCGATAGCAAATAATATGAAAAGATTACGCAATAAAATGACCACCGAAGA
ACTGGCTGAATGCCTCGGTGTGGCTAAACAAACTGTTAACCGTTGGATCAGAGAAAAAGG
CTGGAAAACGGAAAAATTTCCCGGCGTGAAAGGCGGTCGTGCCAGACTTATTCTGGTCGA
TACGCAAGTTTGCGAGTTTATTCAGAACACGCCAGCCTTCCATAACACGCCGATGCTTCT
GGAAGCCGAAGAACCCCTTGCCGAATACGCACCGGGGATTCGCACTCCTGCTTATCGGCA
AATCATCAGCGCAATAGACAACATGACTCACAGTGAGCAGGAAAAAGTTGCGCAATTTTT
GTCACGCGAAGGAATTCGTCATTTCCTTGCTCGTCTCGACATAGATGAATCAGAATAAAT
AAAAAACGGCAGGGGTATCTCTCCTGCCGTTTATCTTTTATGCGCTAATTACTGCTGATT
TTCGCGTTCAGCAATAAAAGCCAGCGCTTTGTTGATACGCTCGATACTGCGGGTCTTACC
GATTGCGTGAACGGTAACATCCAGCGCCGGAGACTGCCCCGCACCGGTTACGGCGACACG
CAGCGGCATACCAACTTTACCCATACCCACTTCCAGCTCATCCGCCGTCGCCTGAATAGC
GTGATGAACGTTTTCAGCGGTCCAGTCAGTAATCGCAGTCAGTTTGTCACGAACTACTTC
CAGCGGCTGACGCGCTACCGGACGCAGATGTTTTTTCGCGGCGTCGGCATCGAACTCAGC
AAAATCTTCGTAGAAATAACGGCAGCTCTGTGCCATCTCTTTCAGCGTCTTGCAGCGTTC
GCCCAGCAGTTTCACCAGATCAGCCAGCTGCGGGCCGTTACGGGTATCGATATTTTCCTG
CTCAATGTGCCACTGTAAGTGAGTAGCAACATACTCCGGCGGCAACGCGTTAATGTAGTG
ATGGTTCAGCCACAGCAGCTTGTCGGTGTTGAACGCACTGGCAGATTTGCTGACGGCATT
CAGAGTAAAGTATTTAATCATCTCTTCACGAGTGAAGATTTCCTGATCGCCGTGGGACCA
GCCCAGACGCACCAGATAGTTCAGCAGTGCTTCAGGCAGATAACCATCATCACGATACTG
CATTACGCTGACCGCCCCGTGACGTTTGGACAGTTTTTTACCGTCATCGCCGTTGATCAT
AGAAACGTGCGCGTAAACCGGTACCGGCGCTTTCAGAGCCTTAAGAATGTTAATCTGGCG
CGGTGTGTTGTTGATATGGTCTTCGCCACGGATAACGTGGGTGATTTCCATATCCCAGTC
ATCGACAACCACACAGAAGTTATAGGTTGGGGAACCATCGGTACGGCGGATAATCAGATC
ATCCAGCTCCTGGTTGCTGAACTCGATCGGACCACGGATCTGATCGTCAAAAACAACAGA
ACCTTCCTGCGGGTTAGCAAAACGTACGACACACGGCTCATCATCAGCGTGATGCTCATG
ACTGTGGCGGCAGCGACCGTCATAACGCGGCTTCTCACCTTTCGCCATTTGCTCTTCGCG
CAGCGCTTCCAGGCGCTCTTTAGAGCAATAGCATTTATAAGCTGTGCCCTCTTCCAGCAT
CTGATCGATCACCGCGTTGTAGCGATCAAAACGTTTGGTCTGGTAGTACGGACCTTCATC
CCACTCCAGGCTCAGCCAGTTCATGCCATCCATAATGGCTTCGATAGCTTCCGGCGTGGA
ACGCTCAAGATCGGTGTCTTCAATACGCAGCACGAACTCACCGCCGTGGTTACGTGCAAA
AAGCCAGGAGTAAAGAGCAGTACGCGCGCCGCCAACGTGCAGATAGCCTGTTGGGCTTGG
CGCGAAGCGAGTTTTGATTTTCATGAAATGGCCTTACGTTTAGAAAGATGCCGACAACCG
GCAAATCCTGGAAAAATTGAGTGGGCGATATTCTATCACTCCCGCCTGATTCCTCAATGT
AGTTCGGGTTGCAACCTTACGCATTATTGTTTTCGTTGACAAATTGCGCAACACGGTCTG
TTTTGCGATCATCTTGCTTAAATTTACGACGAACGAACAATTTCTTTAGAAAATGCGTTG
ACTCATTTTGAACTCTCCCTATAATGCGACTCCACACAGCGGGGGTGATTAGCTCAGCTG
GGAGAGCACCTCCCTTACAAGGAGGGGGTCGGCGGTTCGATCCCGTCATCACCCACCAAC
TACTTTATGTAGTCTCCGCCGTGTAGCAAGAAATTGAGAAGTGGGTGATTAGCTCAGCTG
GGAGAGCACCTCCCTTACAAGGAGGGGGTCGGCGGTTCGATCCCGTCATCACCCACCACT
TTCTCGCCAGCTAGATTTCTTGTAACAATGTGAAGTACCGAAGTGGGTGATTAGCTCAGC
TGGGAGAGCACCTCCCTTACAAGGAGGGGGTCGGCGGTTCGATCCCGTCATCACCCACCA
CTTCGGGTCGTTAGCTCAGTTGGTAGAGCAGTTGACTTTTAATCAATTGGTCGCAGGTTC
GAATCCTGCACGACCCACCAATGTAAAAAAGCGCCCTAAAGGCGCTTTTTTGCTATCTGC
AATTTGCGAAATTGCCTGATGCGCTTCGCTTATCAGACCAACTATGTCCGGCAGTTCCCG
TGCCTCTCATCTACTGCGCCAACGCCGCTAGCAGTTTAACCAGCGCGGGCGTCACCTGCT
TCGTTTCATAAACAATATATAAGTCTGCCGGGATGCGTTCTTTGAGCGGACGGAATATGA
CACCGGGCCAGTTCATCTGCGCGTAGCTGTCCGCTATCAATGTGATACCAATACCCATAC
TGACCATGGCGAGTACCGTTTGCGGTTCATTAACTTCGCGAATAACAACCGGTGAAAATC
CCACCTGCTGGCAAACTCGCTGCAAAAAATCCCAGTCAGTGTACACGGGCGGCATTGTAA
CGAAATACTCGTCACGTAGCGCTTCCAGCGGGACGGTGGAAAATGATGAGAGATGATGCT
CTTCAGGCATCGCCACCAGAAACGCCGATTCATGCAACCGTAAGCTGGTAAAACCAGTCG
GTGGTTCTGTCGCCATTCGCCAGATCCCGGCATCAAGTTCGCGGCGTTCCAGCAAGGCCA
TTTGCATCGCAGGCATCTTTTCGCGAAACAGAACTTCAACGTTAGGATTTTCTCTAAGGA
ATCGCCGCATAACCGGGCGCATCCGTCCCCACATTGCCGTTCCCACATTGCCGTTCCCAC
AACCCCGAGTTCAATCCGCCCTGCTTCTCCCCGACCTATTTGTTCAACCCGAGCCAATAC
ATTATTTGCATTCACCAGCAATCGACGCGATTCTTCCATCAAGATTTTGCCCGCGTGTGT
CAGTACGACGCTGCGCGAATGGCGAATAAAAAGCTGCGTGCCGAGTTGATTTTCCAGCTC
TTTAATATGAATACTGAGCGGAGGCTGAGACATATTTAAACGCGCGGCTGCGCGACCAAA
ATGCAACTCTTCCGCTACGGCAAGAAAATAACGGAGCAACTTAAGATCTGTTCTATATAC
GCGTTCCATAATAAGGTGCTCCATATAAAAAATATATCGTATTAAATTATCATGGCATAA
AGTATTTCACCACCAGATATCCGACATACATAAACACGATGGATAATATACCCGGCAATA
CATTTGGAACAGGAATAGGTAATCGCACGATTGTAAACAAAGCACCAATGCCAAAACCAA
CGCCAGAAGAAAATAAAATATCTTTCACTAATTAACCTTTATCATAAAAGCAGCCCCAAG
GAACAGAGCTGCGAATCCTTTTAATGTGTAACTGAACGATGCGTTATCTTTTCAGGGTCA
TGGTTATATTTAAACCCAAAGAAAAATATCACTGCGAGGAAAAGAGCATACCCTGCAAAC
ATCAGCCAAATGGTATGCCAATCTTTTACGCCATCCACCGAGAAGTAATCCACTGCCATA
CCGCTCAGAATCGAGCCAACCCATGCGCCGACGCCATTTACCATCGTCATAAAAAGGCCC
TGGGCGCTGGCACGAATGCTGGAATCAACTTCCTGTTCGACAAAGACCGAACCAGAAATA
TTGAAGAAATCGAATGCACAACCGTAAACAATCATCGACAGCAACAGCAAAATAAACCCG
GTTGGTGATGGATCGCCATAGGCAAAGAAGCCAAAGCGCAGCGTCCACGCCACCATACTC
ATCAGCATGACGGTTTTAATACCGAAACGCTTCAAAAAGAACGGTATCGTCAGAATGAAA
CCGACTTCAGCCATCTGTGAAACTGACAGTAAAATGGACGGATATTTCACCACGAAGCTA
TCAGCAAACTCAGGATTACGGGCGAAATCATGCAGGAACGGGTTGCCAAAAACGTTGGTA
ATTTGCAGCACCGCGCCCAGCATCATGGCAAAGAGGAAAAAGATAGCCATGCGTGGATTT
TTAAACAGCACGAAGGCATCCAGACCCAGCTTGCTGGCAAGCGATGTAGTCGCTTTTTTC
TCCGCAACCGGAATCTTCGGCAAAGTCAGCGCATAAGCCGACAGCAGCAATGACGCACCG
GACGCGATATACAGTTGCAGACTACTCAATTCCAGATGCAGCAGGCTTACTGCCCACATG
GCGACAATGAACCCCACCGTACCAAAAACGCGAATGGGCGGGAAAGCGGTCACCGGGTCA
AGCCCTGCCTGGGCAAGACAGGAATAAGAGACGCTGTTCGATAACGCAATAGTCGGCATA
AACGCCATCGCATTGACTAACATCACCCAAAACATCATATCCGGATCAGTTACGGATGCC
GCATAAAAAGTACGCCCGCACACACCAGGTGACACAGCATGTATGCACGTTCTGCACGCA
GCCATTTGTCTGCGATGATCCCCATTATACCCGGCATAATAATCGCGGCGATCCCTTTGG
AACTGTAAACCATGCCAACATTAGCGCCGGTGAAATGAAGGGTATTAATCATGTAAGAAC
CGAGGGTAACCAGCCAGCTCCCCCAGATAAAATATTGCAAAAAGGACATTACCTTTAAGC
GCAAAGCGATGCTCATAATCGTTTCCTTGTCGCATCATATGGCCTCACTCAGTGAGGCCG
TTTATTGTTGTTTTACTCAGGCAATTTTGCGCAGAAAGCCGCAAATAAGATTAATAAAGT
TTTGCTTTGAGAGTTCCGCTGCTGCCAGCGTTTGGGCATGAGAAAGCTTCACGTCACTCA
GACCTTCCGCCATGTTGGTAATCGCAGAGACCGCAACGACTTTAAGTTCGCAATGGCGAG
CTGAAATAACCTCAGGCACCACAGACATACCAACAACATCCCCACCAATAATTTGCATCA
TGCGAATTTCCGCCGCAGTCTCGAAATTCGGCCCCGGATATGAGACGAACACGCCCTCCG
TCAGAGGGAACCCCTCTTCTTTCGCCACTTTTTGTAACAGTGCGCGGTATTCCGCATCGT
AGGCATTCGCCAGCGAGAAGAAGCGCTCACCAAAACGTTCATCATTAAGACCCACCATCG
GCGTTCCCGGCATGGTGTTGATGTGATCTTTCAATGCGACCAGACTGCCGGCCCCCACTT
CAGGACGCAGTGAGCCAGCCGCATTGGTGCAGAACAGCAACTCGCAGCCCAGCAACTTAA
AGGTACGGATTGCATCCGTCATGATGGTCATCCCACGACCTTCGTAGAAATGTCCGCGAC
CTTTCATGCACGCCACTGGCACCCCTGGAGATAACCCAGCACCAGCTCACCCGCATGACC
GTGTACGGTACTTACCGGGAACCCAGGCAGCTTTTCGTAGGAAATTGCGACCGCGTTCTC
AATCTGATCGGCCAGCGCGCCCAGCCCGGAACCTAAAATAAAGGCCACTCGTGGCGTGAA
ATCAGGTTTATAAGTCTTGATAATATCTACGCAATACAGTGGGTTATGAGAAAACTGAGC
CTGATACATATATATCCTTTTTTTGTAGGGTGGAATCTAACGCCTTTTTATAACGAGATT
GCCCTACCTCATACCAATACACTTTTTTCATGTATCCGATAGTTATTCGATATCGATATA
TTTATATTTTTTCACTATTAATAGGCTGAAAAAACTGTATTGGTACTCTCCTTTCCCTTG
CATTAACAATATGCCGCTTTTAATCAACCTTTTATTAAGCAATCAACTAATAACGATCGG
CATAGGGAATTATGCTATGAAAAAACATCTTTTTACTCTGACACTCTCTTCTGTATTGGC
GATACCAGCAGTATCCCATGCAGAATTTAAAGGCGGTTTTGCTGATATAGGTATTCATTA
TCTTGACTGGACTAGCAGAACCACTGAGAAATCGTCGACCAAATCACACAAAGATGATTT
TGGATATCTGGAACTGGAAGGCGGCGCTAACTTTAGTTGGGGAGAAATGTACGGGTTCTT
CGACTGGGAAAACTTTTATAATGATCGTCATGATAAACAGGGTAGCGAGCAGCGTTATAC
ATTTAAAAATACCAACCGTATTTACCTGGGTGACACCGGATTTAATCTCTACTTGCATGC
GTATGGCACCTACGGTTCTGCGAATCGTGTGAATTTCCATGACGATATGTTCCTTTACGG
GATCGGCTACAATTTCACCGGCAGCGGTTGGTGGTTCAAACCGTTCTTTGCAAAACGCTA
TACAGACCAAACCTATTATACCGGCGATAACGGTTATGTCGCCGGTTGGGTTGCAGGTTG
CAGCTTTATGCTGGGCAGTGAGAAATTCACCCTCACCAACTGGAACGAGTACGAGTTTGA
TCGTGATGCCACCTACGCGGCAGGTAATGGCGGCAAAGAAGGTCTGAACGGTGCCGTCGC
ACTTTGGTGGAATGCAACTTCACACATCACCACAGGGATTCAGTATCGTTATGCAGATGA
CAAACTGGGCGAAGATTTTTACCAGGATGCAATAATCTACTCCATCAAATTTAATTTCTG
ATTGATTACTGCCGGAGCTCCCGGCAGTATGAATTCACTCTATATCTGATACAACGGATC
CCCTTCCCGCCCAGCCATTAGCGCATTGCCCTGGTCTCGTACTACGTCCCATAACGCTTC
AGCGGCGGTGGAAAGTGAACGGTTCTTCCTGCGCACCAGCATCAACTGGCGTTCAACCAC
CGGCGTAATGCGCTTTACCACCAGTGGGCTACCTTCAGGCAATGGTAGCGCCAGTGCGGG
AAGAATACTGATGCTGATGCCTGCAGCTACCATCGGGAACAGCGTCGCCGGATGACCAAT
CTCCTGCACAATATTCGCCTGAATACCGTTGCGCGCCAGCGCTGCATCAATCAGCGGTCG
GCTGCCTGACGCGTAATCCTGCAACACCAATTTCGCTCCCTGTAATGCCTGCCAGGGGAC
ATAATCTTCCACGGCCAAAGCGCTATCGCGATGGCAAAGCAGAAAGAAAGGCTCGGAAAG
AATCGCTTCACATTGCAGATCGCCCACTGGGCCTGGATCGATGACGATGCCAAAATCGAC
ATCTCCCTGGCGAATACTTTCCATCACCCACTGCTGCGGACGATCGTGCAGGACAAACTG
AATATCTGGATAGCGGCGATGGCTTTCAGCAATGCATTGCGGAATAAGATGCGCGGAAAT
GGTCTGGCTGGCAGCGACCCGAACTTTTCCGCTCAGTTGTTGCCCCATACGCCCGGTCTC
GCGCAACGTGCTGTTAAGTTCATCCAGCAGTCGCTCAAGACGCAAAGCCAACTGCTGCCC
TGCATCTGTAAGCACCACTTCACGCGTGGTTCTGTCCAGCAGGCGAACACCAGTATGATT
TTCCAGCTCCTTCACACTGTGACTCACTGCCGACTGGCTCAGGCCGATACGCTCTCCTGC
ACGACTAAAACTTTTCTCCTGCGCTACTGTGACGAAAACCTTTAATTGCTTTAAAGAATA
ATTCATCTGTTTTTTTCATGAATGGATGCAATAAATCAATTTTATTTCTCAAACTGGAAG
ACGCACAATAGAACCATCGATCATCTGGAGTCTTTATGAAACTTTTTCGTATCCTCGATC
CTTTCACCTTAACCCTGATCACGGTGGTGTTGCTGGCCTCTTTCTTTCCGGCCAGAGGCG
ATTTCGTCCCCTTCTTTGAAAATCTGACCACTGCAGCTATTGCTCTGCTGTTCTTTATGC
ACGGCGCGAAGTTGTCGCGTGAGGCGATTATTGCTGGCGGTGGTCACTGGCGACTGCATT
TGTGGGTAATGTGCAGCACCTTCGTACTGTTTCCGATTCTGGGCGTGCTGTTTGCCTGGT
GGAAACCGGTAAATGTCGACCCGATGCTCTACTCCGGTTTTCTCTACTTGTGCATTCTCC
CCGCGACCGTGCAGTCTGCAATCGCCTTCACGTCAATGGCGGGCGGTAACGTCGCGGCGG
CGGTTTGTTCTGCGTCAGCATCCAGCCTGCTGGGGATTTTCCTTTCACCATTGCTGGTTG
GTCTGGTGATGAATGTTCACGGTGCAGGGGGCAGCCTTGAGCAGGTCGGTAAAATTATGC
TGCAACTGTTGCTGCCATTTGTGTTGGGGCATCTTTCCCGGCCGTGGATTGGTGACTGGG
TGTCGCGTAATAAAAAATGGATTGCGAAAACTGACCAGACGTCCATTCTGTTGGTGGTTT
ATACGGCATTCAGCGAAGCCGTCGTTAACGGTATCTGGCACAAAGTTGGCTGGGGATCAT
TGCTGTTTATCGTGGTGGTCAGTTGCGTTCTTCTGGCTATCGTGATTGTAGTTAACGTCT
TTATGGCACGCCGACTGGGCTTCAATAAGGCAGATGAAATTACTATCGTCTTTTGTGGTT
CGAAAAAGAGTCTGGCAAATGGCATCCCGATGGCAAACATTCTGTTCCCCACATCGGTGA
TCGGTATGATGGTGCTGCCCCTGATGATTTTCCATCAGATCCAATTGATGGTCTGTGCGG
TGCTGGCGCGTCGATACAAACGCCAGACCGAACAGTTACAGGCACAGCAGGAAAGCAGCG
CCGATAAAGCTTAAAGCGGACGCTTCAGGGGCTGGACCAGTTGCGTCAGCCCCTCGGTTT
TAATCAGCAGCGTGATTTGCATTAGCTCACCGAGTTTCCCTGCCGGGAACTCATCTTTGC
GGGCAAACCACAGCAGATACTCCTCCGGCAGGTCGATTAAGCGACGCCCTTTGTACTTGC
CAAACGGCATTATCGTATTGGCTATTTCAATCAGCTGCTCTTTTTCCATCTCAGCTACCC
AGCAAACGCAGCATTTCCGTTTCGTCGATGACTTCAATGCCCAGTTCCTGCGCCTTCGCC
AGTTTAGATCCTGCAGCTTCACCCGCTATCACCAGATCGGTTTTCTTCGACACGCTGCCC
GCGACTTTCGCCCCCAGTTCGACCAGTCGAGCTTTAGCGTCATCACGCGACATCTGGCTT
AAGCTGCCCGTAAGCACCACGGTTTTACCAGCAAACGGACTGTCAATCTCTTCCGCATTG
ATAACGATCGGCTCAGGCCAGTGAACACCTTCCGCCAACAGCTCGCTGATGACATTGCGG
TTGCTTTCTTCGGCAAAGAAGTTGTGAACGTGGGAGGCAACGACAATTCCAACATCAGGC
ACCTTTTGCAGCTCTTCAATCGACGCGGCTTCCAGCGCTTCCAGCGTGCCGAAATATGCC
GCCAGACCTGCTGCGGTAGCCTCGCCGACTTCACGGATGCCAAGTGCATAGAGGAAGCGG
GCAAAGGTGGTTTCTTTCGCTTTTTCCAGCGCGTTAACCACGTTTTGTGCCGATTTCGGC
CCCATACGCTCCAGTCCGGTCAGTTTGACTGCGGTGAGTTTGAACAGATCCGCCGGAGTG
TGGACATATTCTTTTTCAACCAGTTGATCGATGATTTTGTCGCCCATTCCGTCAACATCC
ATCGCACGGCGGGAAACAAAGTGTTTCAGAGACTCTTTACGCTGCGCACCGCAAATCAGG
CCACCGGTACAGCGGGCAACCGCTTCACCTTCCACACGCTCGACGTCAGAACCACATACC
GGACAATGCGTCGGGAATACAACCTCACGGGTATCTTCCGGGCGTTCAGAAAGCACGACG
TTAACCACCTGCGGGATCACGTCGCCAGCGCGGCGAATAACCACTTTATCGCCAATGCGT
AAACCAAGACGTTCGATTTCGTCAGCATTATGCAGTGTAGCGTTACTCACCAACACGCCA
GCAACATGGACAGGTTCCAGACGCGCAACAGGCGTAATCGCGCCAGTACGCCCAACCTGA
AACTCGACGTCACGCACAAAGGTCATCTGTTCCTGCGCCGGGAATTTAAACGCTACCGCC
CAGCGCGGGGCACGCGCGACAAAGCCAAGCTGCTCCTGCTGTGCCAGTGAGTTGACCTTA
ATCACCACGCCGTCGATATCAAAGCCCAGCGTCGGACGGTCTTTTTCTACTTCGTGATAA
AACGCCAGCACTTCTTCCGCCGATTCACAAAGTGTTACCCGATCACTGACAGGTAATCCC
CACGCTTTAAATTGCATTAAGCGTCCCAAATGGGTATCCGGCAATTCACCGCCTTCCAGA
ACACCAACGCCGTAGCAGAAGAAAGTGAGCGGTCGCTTCGCTGTAATACGCGGATCAAGC
TGACGCAGTGAACCAGCTGCCGCATTACGTGGGTTAGCAAACACTTTCCCGCCCGTGCGT
CGCGCATCTTCGTTAATCTTTTCGAACCCCGCCTGCGGCAGGAACACTTCACCACGCACT
TCCAGACGCGCCGGGATATTCTCACCGTGTAGCTTCAGCGGAATGGCGCGAATAGTACGC
ACATTAGACGTGATATCTTCCCCGGTGGTGCCATCGCCACGAGTCGCGGCACTGACTAAA
ACACCATTTTCATACAGAATACTGACGGCAAGACCATCCAGCTTCAGCTCACAGCACCAG
GTGACTTTCTCGTTGCTTTTCAGACGGTCCTGCACACGTTTGTTGAAAGCAAGAAAGCTT
TCTTCATCAAAAACGTTATCCAGCGACAGCATTGGCACTTCATGGCGGATCTGGCTGAAA
GCCGCCAGCGGCGCTGCACCTACACGTTGGGTAGGCGAATCAGGCGTAATCAGTTCTGGA
TGTTTGGTTTCCAGCTCGCGCAGTTCGCGCATCAGCCTGTCGTATTCAGCGTCGGGAATT
TCCGGCGCATCCATCACATGATAAAGATATTCATGATGGCGAAGCGTCGTTCGCAGTTCT
ATCAGTTGTTGTTCGATTGATTCCATATCGCACCATCAATGCTAAAAACCCCCGACAAGC
GGGGGTTCGAAGAGGAGTTAGTTTGCCTTAAGTGTATCAGGCGTTGGCGTCTTTGACTTC
GCGGATGATGTCCTGGTACTCGCGCAATTTCTGCGGAGTCATCATACGGCGCTGATCGTC
AAGCACTACACCGCCCACTTCATCGGCAATATGCTGCGCAGATTGCAGCATCAGCTTAAA
GTTCTGCAGCTCGTCACCGTAAGACGGTACCTGCATAAAGATAGTGACACCCGGAGTAGT
GAAATCCTTCATTTCAGGATCAAAGGTTCCCGGTTTCACCATATTCGCCAGGCTGAATAA
CGCCGGGCCGCTGCCATCCGGGCTAAGATGACGATGGTAAATGTTCATATCGCCAAAAAT
GAAGCCCGCTTGTTGAATGCTGTTAAGAAGCAGTTCACCGTTTAACTCGCTACCGTGATG
CGCCGCGACGTTCATGATAATCACCGCTTCTTTGCGCTTCGGTTTATCCATAACTGGAGC
CGGTTCCGCTACAGGCTCAGGCTGTGGTGCCGCTACGGGTTCTGCAGGCTGAAAAGCCTG
TTGTGCCGGTTGCGGTGCTGAATGCACTGGCTGCGGCGCTGACGCGAGCTGTGGCGAAAC
TGGCTGCTGCAACGGCTGTTCAGGCTGCGGCTGATAGGCAGGCTGCTGCACGGGTTGCTG
CACCGGCTGCGTTGGACGCGGAGCATGTTGCGGCGGTACCTGCGCTTCAGGCGGCTGCTG
GACCGGTTGACGCGGCTGCGCAGACGCATAAGGCGGTTGGTACTGGTGTTGCGGCGACGG
ACGAGCAACCTCATGCTCCTGGGCGTTAGCCGGGGCATGATTCACGCGGTGAACACGAAC
CTCACCAACGCCCTCATCATCTTCGACATCCTCGTCATAAGAATCGTCGTCACGTTTTGA
CTTCATTCGTTTTAATGGCCGATCGCGGAACATAGAAGATCGTTCTTTACGGCTGGTCCA
GAAACCATGTACCAGTAAAGCGATTATGGCGATCGCGCCAACAATGATTAATATCAGACG
CAAATCCTGCATCATTATATTCTCTGTTGTTCTAACACCTTGCCACCACGGCAAACATTT
ACTCACTAAGAGTATTTGCCGATTACCTCAAGTGCAAGTGCACTATTAACTTTCACAGCA
CAAAGATAGATGAAATCGTGCTTTTTGCTGTTTTTTCGAACATATCCTAACTGTCCATTG
CGCAATTACCCGGTAAAATACGCAGAATTTTCCTGGGATTGGTCAAAAGGAGCTCATCCT
GATTATGGTTTCATCATTCACATCTGCCCCACGCAGCGGTTTTTACTATTTTGCGCAAGG
CTGGAAGCTCGTCTCGCAACCTGGGATTCGGCGTTTCGTTATTTTACCGCTGCTGGTCAA
TATTTTGTTGATGGGGGGCGCATTCTGGTGGCTCTTTACGCAACTCGATGTCTGGATCCC
GACTCTCATGAGTTATGTTCCGGACTGGTTACAATGGCTGAGCTATCTGTTGTGGCCTCT
GGCTGTCATCTCTGTGCTGTTAGTGTTTGGCTATTTCTTCTCAACGATTGCTAACTGGAT
TGCCGCTCCGTTCAATGGTTTATTGGCTGAACAACTGGAAGCACGATTGACTGGCGCTAC
ACCGCCAGATACCGGGATTTTCGGTATCATGAAAGATGTGCCGCGAATCATGAAACGCGA
ATGGCAAAAATTTGCCTGGTATCTGCCGCGCGCAATTGTATTGCTAATTCTTTACTTCAT
CCCTGGTATTGGGCAAACCGTCGCGCCGGTACTGTGGTTCCTGTTTAGCGCCTGGATGTT
AGCCATCCAGTATTGCGATTACCCCTTCGATAACCACAAAGTGCCGTTTAAAGAGATGCG
CACCGCCCTGCGCACACGCAAAATCACCAATATGCAGTTTGGTGCTTTAACCAGCCTGTT
TACGATGATCCCGTTGCTTAATCTGTTCATCATGCCCGTTGCCGTTTGTGGTGCGACGGC
GATGTGGGTCGATTGCTATCGCGATAAACACGCGATGTGGCGGTAACAATCTACCGGTTA
TTTTGTAAACCGCTTGTGTGAAACAGGGGTGGCTTATGCCGCCCCTTATTCCATCTTGCA
TGTCATTATTTCCCTTCTGCATATAGATATGCTAAATCCTTACTTCCGCATATTCTCTGA
GCGGGTATGCTACCTGTTGTATCCCAATTTCATACAGTTAAGGACAGACCATGAGTAAGA
TTTTTGAAGATAACTCGCTGACTATCGGTCACACGCCGCTGGTTCGCCTGAATCGTATCG
GTAACGGACGCATTCTGGCGAAGGTGGAATCTCGTAACCCCAGCTTCAGCGTTAAGTGCC
GTATCGGTGCCAACATGATTTGGGATGCCGAAAAGCGCGGCGTGCTGAAACCAGGCGTTG
AACTGGTTGAACCAACCAGCGGTAATACCGGGATTGCACTGGCCTATGTAGCTGCCGCTC
GCGGTTACAAACTTACCCTGACCATGCCAGAAACCATGAGTATTGAACGCCGCAAGCTGC
TGAAAGCGTTAGGTGCAAACCTGGTGCTGACCGAAGGTGCTAAAGGCATGAAAGGCGCAA
TCCAAAAAGCAGAAGAAATTGTCGCCAGCAATCCAGAGAAATACCTGCTGCTGCAACAAT
TCAGCAATCCGGCAAACCCTGAAATTCACGAAAAAACCACCGGTCCGGAGATCTGGGAAG
ATACCGACGGTCAGGTTGATGTATTTATTGCTGGTGTTGGGACTGGCGGTACGTTGACTG
GCGTCAGCCGCTACATTAAAGGCACCAAAGGCAAGACCGATCTTATCTCTGTCGCCGTTG
AGCCAACCGATTCTCCAGTTATCGCCCAGGCGCTGGCAGGTGAAGAGATTAAACCTGGTC
CGCATAAAATTCAGGGTATTGGCGCTGGTTTTATCCCGGCTAACCTTGATCTCAAGCTGG
TCGACAAAGTCATTGGCATCACCAATGAAGAAGCCATTTCTACCGCACGTCGTCTGATGG
AAGAAGAAGGCATTCTTGCTGGTATCTCTTCTGGAGCAGCTGTTGCTGCGGCGTTGAAAC
TACAAGAAGATGAAAGCTTTACCAATAAGAATATTGTGGTTATCCTGCCGTCATCGGGTG
AGCGTTATTTAAGCACTGCATTGTTTGCCGATCTTTTCACTGAGAAAGAACTGCAACAGT
AATGCCAGCTTGTAAAAAATGCGTAAAAAAGCACCTTTTTAGGTGCTTTTTTGTGGCCTG
CTTCAAACTTTCGCCCCTCCTGGCATTGATTCAGCCTGTCGGAACTGGTATTTAACCAGA
CTAATTATTTTGATGCGCGAAATTAATCGTTACAGGAAAAGCCAAAGCTGAATCGATTTT
ATGATTTGGTTCAATTCTTCCTTTAGCGGCATAATGTTTAATGACGTACGAAACGTCAGC
GGTCAACACCCGCCAGCAATGGACTGTATTACGCTCTTCGTGCGTCGCGTCTGTTAAAAA
CTGGCGCTAACAATACAGGCTAAAGTCGAACCGCCAGGCTAGACTTTAGTTCCACAACAC
TAAACCTATAAGTTGGGGAAATACAATGTTCCAGCAAGAAGTTACCATTACCGCTCCGAA
CGGTCTGCACACCCGCCCTGCTGCCCAGTTTGTAAAAGAAGCTAAGGGCTTCACTTCTGA
AATTACTGTGACTTCCAACGGCAAAAGCGCCAGCGCGAAAAGCCTGTTTAAACTGCAGAC
TCTGGGCCTGACTCAAGGTACCGTTGTGACTATCTCCGCAGAAGGCGAAGACGAGCAGAA
AGCGGTTGAACATCTGGTTAAACTGATGGCGGAACTCGAGTAATTTCCCGGGTTCTTTTA
AAAATCAGTCACAAGTAAGGTAGGGTTATGATTTCAGGCATTTTAGCATCCCCGGGTATC
GCTTTCGGTAAAGCTCTGCTTCTGAAAGAAGACGAAATTGTCATTGACCGGAAAAAATTT
CTGCCGACCAGGTTGATCAGGAAGTTGAACGTTTTCTGAGCGGTCGTGCCAAGGCATCAG
CCCAGCTGGAAACGATCAAAACGAAAGCTGGTGAAACGTTCGGTGAAGAAAAAGAAGCCA
TCTTTGAAGGGCATATTATGCTGCTCGAAGATGAGGAGCTGGAGCAGGAAATCATAGCCC
TGATTAAAGATAAGCACATGACAGCTGACGCAGCTGCTCATGAAGTTATCGAAGGTCAGG
CTTCTGCCCTGGAAGAGCTGGATGATGAATACCTGAAAGAACGTGCGGCTGACGTACGTG
ATATCGGTAAGCGCCTGCTGCGCAACATCCTGGGCCTGAAGATTATCGACCTGAGCGCTA
TTCAGGATGAAGTCATTCTGGTTGCCGCTGACCTGACGCCGTCCGAAACCGCACAGCTGA
ACCTGAAGAAGGTGCTGGGTTTCATCACCGACGCGGGTGGCCGTACTTCCCACACCTCTA
TCATGGCGCGTTCTCTGGAACTGCCTGCTATCGTGGGTACCGGTAGTGTCACCTCTCAGG
TGAAAAATGACGACTATCTGATTCTGGATGCCGTAAATAATCAGGTTTACGTCAATCCAA
CCAACGAAGTTATTGATAAAATGCGCGCTGTTCAGGAGCAAGTGGCTTCTGAAAAAGCAG
AGCTTGCTAAACTGAAAGATCTGCCAGCTATTACGCTGGACGGTCACCAGGTAGAAGTGT
GCGCTAACATTGGTACGGTTCGTGACGTTGAAGGTGCAGAGCGTAACGGCGCTGAAGGCG
TTGGTCTGTATCGTACTGAGTTCCTGTTCATGGACCGCGACGCGCTGCCCACTGAAGAAG
AACAGTTTGCTGCTTACAAAGCAGTGGCTGAAGCGTGTGGCTCTCAGGCGGTTATCGTTC
GTACCATGGACATCGGCGGCGACAAAGAGCTGCCATACATGAACTTCCCGAAAGAAGAGA
ACCCGTTCCTCGGCTGGCGCGCTATCCGTATCGCAATGGATCGTAAAGAGATCCTGCGCG
ATCAGCTCCGCGCTATCCTGCGTGCCTCTGCTTTCGGTAAATTGCGCATCATGTTCCCGA
TGATCATCTCTGTTGAAGAAGTGCGTGCACTGCGCAAAGAGATCGAAATCTACAAACAGG
AACTGCGCGACGAAGGTAAAGCGTTTGACGAGTCAATTGAAATCGGCGTAATGGTGGAAA
CACCGGCTGCCGCAACAATTGCACGTCATTTAGCCAAAGAAGTTGATTTCTTTAGTATCG
GCACCAATGATTTAACGCAGTACACTCTGGCAGTTGACCGTGGTAATGATATGATTTCAC
ACCTTTACCAGCCAATGTCACCGTCCGTGCTGAACTTGATCAAGCAAGTTATTGATGCTT
CTCATGCTGAAGGCAAATGGACTGGCATGTGTGGTGAGCTTGCTGGCGATGAACGTGCTA
CACTTCTGTTGCTGGGGATGGGTCTGGACGAATTCTCTATGAGCGCCATTTCTATCCCGC
GCATTAAGAAGATTATCCGTAACACGAACTTCGAAGATGCGAAGGTGTTAGCAGAGCAGG
CTCTTGCTCAACCGACAACGGACGAGTTAATGACGCTGGTTAACAAGTTCATTGAAGAAA
AAACAATCTGCTAATCCACGAGATGCGGCCCAATTTACTGCTTAGGAGAAGATCATGGGT
TTGTTCGATAAACTGAAATCTCTGGTTTCCGACGACAAGAAGGATACCGGAACTATTGAG
ATCATTGCTCCGCTCTCTGGCGAGATCGTCAATATCGAAGACGTGCCGGATGTCGTTTTT
GCGGAAAAAATCGTTGGTGATGGCATTGCTATCAAACCAACTGGAAACAAAATGGTCGCG
CCTGTAGACGGCACCATTGGTAAAATCTTTGAAACCAACCACGCGTTCTCTATCGAATCT
GATAGCGGCGTTGAACTGTTCGTCCACTTCGGTATCGACACCGTTGAACTGAAAGGCGAA
GGCTTCAAGCGTATTGCTGAAGAAGGTCAGCGCGTGAAAGTTGGCGATACTGTCATTGAA
TTCGATCTGCCGCTGCTGGAAGAGAAAGCCAAGTCTACCCTGACTCCGGTTGTTATCTCC
AACATGGACGAAATCAAAGAACTGATCAAACTGTCCGGTAGCGTAACCGTGGGTGAAACC
CCGGTTATCCGCATCAAGAAGTAATTCTTGCCGCAGTGAAAAATGGCGCCCATCGGCGCC
ATTTTTTATGCTTCCGCCAGCGGCGGCAAAATCAATTCATCGCTCTCATGCTGCTGGGTG
TAGCGCATCACTTCCAGTACGCGCAACCCCGCACGGTGCACCGCATCGTTTAACGCCTTC
CCTTTCAGCAAACCACTGATAAGCTGAGCACAAAACAGGTCGCCAGTCCCTTTCAGGTCG
GTTTTTACCCGTGAATGGGAAATGACATTCACGCTGTCGGCACTGACCACCACCACCTGC
ATCTCCTGATTTTCTTCATTACCGGAGGCGCTGGTAATCACCACCCATTTTAATGTGTCT
GAAAGCAGACTTTTTGCGGCAGCAATGGCACTGTCGAGATCGCGGCAATTTTTACCGGTC
AGGATTTCCAGCTCAAAAATATTGGGGGTAATTCCCTGCGCCAGCGGCAGTAAATATTGT
CGATACGCCTCGGGAAGGTCAGGTTTGACATAAATTCCGCTATCAATATCGCCAATCACT
GGATCGACCATGATCAATAGGTCAGGATGATCTTTGCGTAGCGCAGTCAGCCACTCGGCA
AGGATTTTGATTTGCGATGCCGTTCCCATATAGCCCGTGGTTACAGCACGAAGTTGGCGC
AGCGCATCACGCTCCTGAAGCGCACGCAAATAACCGCTAAACCATTCATCCGGAATCGCA
CCACCGTAGAAAGTGTCATAATGCGGCGTATTGCTCAGCAATACCGTCGGCACGGCAAAG
ACATTCAGGCCGTTCTGTTTGATAGCAGGCACCGCAATGCTGTTGCCTACGCTGCCGTAC
ACTACCTGCGACTGCACGGCAACGATATCCGCCTGCAGTGCCCTGCTCTTATCGTTAAAC
AACAACAAACTACTCATTTAATTTTTTCTCCTTGCCGATGATCCTCATCGTATTCCAACC
GAAACTTTACCTGATTCTGGCAGTCAAATCGGCTATTACAAAACAAGGATAAGGTAATTC
AGTGAAGAAAATCATTTGTCTGGTCGTTACGCTGCTAATGACACTCCCCGCTTATGCGAA
GTTAACGGCCCATGAAGAAGCCCGTATCAACGCCATGCTGGAGGGATTAGCACAGAAAAA
GGATTTGATATTTGTGCGCAACGGTGATGAACATACCTGCGATGAAGCGGTTTCTCATCT
GCGCCTGAAGCTGGGCAATACCCGTAATCGCATTGATACAGCCGAGCAGTTTATTGACAA
GGTGGCCTCGTCGTCATCGATTACCGGGAAGCCGTATATCGTGAAGATGCCCGGTAAGAG
CGATGAGAACGCACAGCCTTTTTTACATGCGTTAATTGCGCAGACGGATAAAACGGTGCC
TGCGCAATAATCTTAAATCCCCGCCCCCTGGCTAAAATACTCTTCCCCAAACACCCCGGT
AGAAAGGTAGCGATCGCCACGATCGCAGATGATCGCCACCACCACCGCGCCAGGGTTAGC
TTTTGCCACCCGCAGTGCTCCGGCAACCGCGCCGCCGGAGCTTACGCCGCAGAAAATCCC
TTCCCGCACTGCCAGTTCGCGCATGGTGTTTTCCGCATCGCGCTGATGAATATCCAGCAC
CTCATCCACCAGAGAAGCATTGAAAATCCCCGGCAGATATTCCGCAGGCCAGCGGCGAAT
GCCGGGAATACTGCTGCCTTCTTCCGGCTGCAGGCCAACAATGGTCACCGGTTTGGATTG
TTCGCGCATAAAGCGTGACACACCGGTAATGGTGCCGGTCGTCCCCATACTGGAGACAAA
ATGCGTAATGCGCCCGCCAGTTTGCTGCCAGATTTCCGGCCCGGTGGTGGTGTAATGGGC
GAAGGGATTATCAGGATTATTGAACTGATCGAGCAGCTTTCCTTCACCACGATTGGCCAT
CTCCAGCGCCAGATCGCGCGCGCCTTCCATGCCCTGCTCTTTGGTGACAAGAATCAGTTC
CGCACCGTATGCCAGCATCGCTGCACGGCGCTCCTGGCTCATGTTGTCGGGCATCAGCAA
TTTCATGCGATAGCCTTTAAGCGCGGCAATCATTGCCAGCGCAATGCCGGTGTTACCACT
GGTGGCTTCGATCAGCACGTCACCCGGTTTAATTTCCCCGCGCTTTTCCGCCTCAACGAT
CATCGAAAGTGCCGCACGATCTTTTACCGAACCTGCCGGGTTATTACCTTCCAGTTTCAA
CCAGACTTCACTGCCGTTATTCGGCCCCATTCGCTGCAACTTCACCAGAGGCGTATTGCC
AATTGTTTGTTCTAATGTACTCACGATCTATGTCCATACGTGGTGTTGCCTGATGCGACG
CTTGCGCGTCTTATCAGGCCTACAGGTTACAAACCTTGCCATTAAAAAGCCCGGATCGCG
GGAAGCGCCTCCGGGCGTTTAACATTCACTCAACCTATCAGGCGCTTTGTGCGAGAGCAA
GTTCCTCATCACGGGTTTCAATACGCTCATCGCCGTTATACAGCCGCGCATGTTGCAGAC
CAACGTATAAACGATCGCCACGCTGCGGGGCATCGTCGCCATGCATCACGACCGTCAGCG
GTTCGTTGTACCACCCCAGCGGCTGCACCACTAATTGGGTGTAGTGACCTTTCGGGCTGG
CTTCCAGTACCTGTACTGGTAGCGGCGAATCGAGGCTGGTACGGCGGCTGATATCCACTT
CCCACGGGCGCAGGAAGAGATCCACCGGCCCCTGATACGCGGGGGTGTATCCCAGCGGCC
AGCGATGTGCGCCAACGTGGAACTGCCCGCCGCGAATGGTTCCCTGCAGGCGGTTTACCT
CGCCCATAAACTCCAGCACAAAACGAGTCGCCGGTTCACGCCATACCTGATCCGGTGCGT
CAGCTTGTTCAATATTGCCCTGACTCATCACCACTACACGATCAGCTACTTCGGTCGCCT
CTTCCTGGTCGTGGGTCACGAACACGCTGGTGAATTTCAGTTCTTCATGCAGTTGACGCA
GCCAGCGACGCAGCTCTTTACGCACCTGCGCATCCAGCGCGCCAAACGGTTCATCAAGCA
GCAAAATTTGCGGTTCCACAGCCAGCGCGCGTGCAAGCGCCACACGCTGTTTCTGACCGC
CGGAAAGCTGCGCCGGATAACGATCCGCCAGATGAGCAAGCTGCACCATCTCCAGCAATT
TTGTCGCTTTCGCTTTGATCTGCGCCGCATTCGGGCGTTCACGCCGTGGCAACACCGTCA
GGCCAAAAGCGATATTGTCAAACACCGTCATATGGCGAAACAGCGCGTAATGCTGGAACA
CGAAACCGACTTTACGGTCCCGCGCGTGCAGACGGCTCACGTCGGTACCGTGAAAGCGAA
TATGCCCACTGGTTTGATGCTCCAGCCCGGCGATAATGCGCAGCAGCGTGGTTTTCCCGG
AACCGGACGGCCCAAGCAACGCGACCATCTGACCAGAAGGAATATCCAGTGAGATATCGT
TCAGCACCTGGGTGCGACCAAACGACTTCTTAATATTGGCAATCTCAATGCTCATGATGC
TCCTCCTGCTGCGCGCGTTTTTCCTGGTTCTCCAGGCGCCACTGCAACATACTCTTTAAA
AACAGGGTGATAATCGCCATCAGCGTCAACAGCGCCGCGGCGGTAAAGGAGCCGACGGTG
TTGTAGTCTTGCTCCAGCAATTCAATCTGTAACGGCAGCGAAAGTGTTTCGCCGCGAATC
GAGCCGGAAACCACCGACACCGCACCAAACTCGCCAATCGCGCGGGCGTTGGTCAGCACC
ACGCCATAAAGCAGCGCCCAGCGGATGTTCGGCAGCGTGACGCGGCGAAACATCTGCCAG
CCAGACGCGCCAAGCAAAATCGCCGCTTCGTCTTCCTGGCTGCCCTGGCTTAACATCACC
GGCACCAGCTCACGCACCACAAACGGACACGTCACGAAGATGGTGACCAGCACCATTCCC
GGCCAGGAGAACATAATTTGCAGATTATGTTCATCCAGCCAGCCGCCGAGCGGGCCGTTA
GAGCCGTAGAACAGCAAATACACCAGACCGGCAACCACCGGCGACACGGCAAACGGAATG
TCCAGCAGCGTCAGCAATAACTGGCGTCCGGGGAAATTAAATCGCGTCACTAGCCACGCC
AGCAGAATGCCGAACACTAGGTTCACCGGCACGGCAATCAGCGCAATCATCACCGTCAGC
CAGATGGCGTGCAGCATGTCCGGATCGGCCAGATTCTGTAAAACCGGCATCAGCCCTTTG
CTGAACGCCTGCACGAAGATGTAAATCATCGGCACCAGCAGGATGAACGCCGAAACCAGC
ATCCCGATGCCAATCAGAAACCATTTGCCCCAGTTAATCGGGCGCGCGTCATAACGCTTC
AATTGTGTCACTTCCGCCATTAATGACCTACCACACGCCGACCAAAGCGACTTTGCAGAG
TGTTAATTGAGAACAGCAGCAGCAGGGATGCCGCGAGGATCACCGAAGCAATTGCGCTCG
CCGCCGGGTAATCAAACTCCTGTAAGCGCACAAAAATCATCAGCGACGTTACTTCTGTTT
TCCAGGCGATATTCCCGGCGATAAAAATCACCGCGCCAAACTCACCGAGGCTGCGGGTAA
ATGACAGCGCCACACCCGCCACCAGCGCCGGAGATAGTTCCGGCAGCACCACTTTGCGAA
AACTCTGCCAGCGCGTAGCACCGAGCGTTTCTGCCGCTTCTTCATATTCCGGGCCTAACT
CTTCCAGCACCGGCTGCACGGTGCGCACCACAAACGGAATGCTGGTAAAGGCCATCGCCA
CCGCAATCCCCAGCCATGTATAGGTGACTTTGATATCAAACTTCGCCAGCCATTCACCGT
AAAAACCGTTCACGGAAAAGAGCGAGGCCAGCGTTAAACCGGCGACTGCCGTTGGCAGCG
CAAAGGGTAAATCCATCAGCGCATCAAGCAGCGTGCGGCCCGGAAAGCGATAGCGGGTTA
AGATCCACGCCATCAGCAGACCGAAAACGCCGTTAAAAATCGATGCCACAAACGCCGACA
GCAGCGTCACTTTATAGGCTGCGACCACCTGCGGGTTGGTGATCACCTCCCAGTACTGCG
CCCAGCTCATCTGGGCCAGTTGCATCACCAGCGCGGAGAGCGGCAGCAGCAAAATCAGGC
ACACAAACAGCAGACTGGTGCCGAGGCTTAAGGTAAAGCCCGGCAGCACGCGTCTTGAAG
AAACTGCAAACATTACTTACGCCCCGCCGCTAACAGCTTGTCTAACTCGCCGCCGCTGGT
GAAGTGGGTTTTCATCACTTCCGGCCAGGAGCCAAATTTATCTTCCACGCGGAACAGCTC
GGTCTGCGGAAATTTATCTTTCAGTTTGCCCATGACTTCCGGGTTATTTACGCGGTAGTA
ATAGTCGGTGATGATGGTTTGCGCCTGCGGGCTATAGAGCCAGTTCAGGTAAGCTTTTGC
TGCTTTTTCCGTACCGTTGGCCTGCACATTTTTATCGACCCACGCCACCGGGAATTCCGC
CAGAATGTTGGTTTTCGGAATCACCACTTCAAAGCCCTGCGCTTCATACTGTTTACGGAT
GTTGTTCACTTCCGATTCAAAGCTGATCAACACATCGCCCAGGCCGCGCTCGGCAAAGGT
GGTAGTCGCGCCACGACCGCCAGTATCGAACACTTCAACGTTTTTCAGGAACTGAGTCAT
AAACTGTTCAGTTTTGGCTTTGTCGCCACCGTCGGCTTTGTCCGCTGCGCCCCATGCCGC
AAGGTAGGTATAACGCGCGTTACCCGACGTTTTCGGGTTCGGGAAAATCAGCTTCACATC
GGAGCGCACCAGGTCGTTCCAGTCGTGGATATTCTTCGGGTTGCCCTTACGCACCAGGAA
GCCCATGGTGGAGTAGAACGGCGAGCTATTATTCGGCAGGCGCGACTGCCAGTCCGCTGG
GATCAGCTTGCCTTTATCGTGCAGGATTTGTACGTCGGTCACCTGGTTATAAGTGACAAC
GTCGGCTTTTAAGCCCTGCAAAATCGCCAGCGCCTGTTTTGATGATCCGGCATGAGATTG
TTTAATCGTCAGTTTGTCGCCACCGTTATCTTTTGCCCATTGCTGTTCAAACGGCGGGTT
CAGGGCGGCAAACAGCTCGCGGGAGACGTCATAAGAACTGTTCAGCAGTTCCGTTGCCTG
TACATGGCCCGCCAGTAGCAGAGAAGCGACCAGCACGAGTGAGTTCTTTTTCAGTAAGTT
AACGGCCATTGCGCACCCTTATAAATTTAACGACTTTCTAATAGCCATCATATTTATAAC
GGACGTGAAAGGAGTAACGGTTTTATATACCGTTTGGTGATTTGGAAGTTGAAAAGGGAA
TAAGACGAAATCCTCCCCACAAATGCAGCTGTCTCTTATACACAAATCCCCACCCGGGGA
TTTGTGATGTCTGTCAGTCTGCTTTAGGGGGACTCTTTCCATCCGGTAGTTTCCTTCCTC
CCCGGCAGCGATTTTTTGAACTTTTTCCTCACCCGTTGATCTTCTCTTATATTTCATTTT
CTTCGGGTCTGTTATGGTACTTTCTGATTGTTATTCATGGGCTAACGAGCAGTTTGGACA
TGCCCGTCTCGGTGATCCGCGTCGTACACGACGCCTTGTGTCACTGGCCTCTTCTCTCGC
TCAGCATGCAGGTCTTTCTATTGTGAAATCATCCCAGTCCACTGCTCAGGTTGAAGGTGC
GTACCGCCTGATACGTAACCCGTCTGTGTCCCCGCAAGCCATTGCCGAAGCCGGATTTAC
CGCCACTGTAAGGACATGTGAGGCTCATCCGCTGCTCCTCGCGCTGGAAGACACCACCAC
CATTAACTTCAGTCACAGTACGGCATCTGATGACCTGGGGAATACCACCACTAACCCGAA
GACGCGCGGGCTGCTGGCTCACTCTGTCCTGATGTACGCCCCCGACAGCGCCCTGCCAGT
CGGTCTTATCGAACAGCAGCGCTGGAGTCGTGCCACGGACACCTACGGTGTTAAGCACCA
GCGAAAAGAACGTCCCTATGAAGAAAAAGAAAGTTACCGCTGGCAGCAGGCTTCGGAGCG
CATGGCCGAACGGCTGGGGGAGATACAGAAACGGGTAATCACTGTCTGTGACCGGGAAGC
GGATATCTGGCATTACCTGCATTATAAAGTCAGCCACGGGCAGCGCTTCGTGGTGCGTGC
AGCACAGAATCGCCGGCTGGAAGAAGCACCCGGCAAGCTCTTCGAACTGCCGGAAGTCCT
GGCAACCGCGGGAAGCCACACGCTGAATGTGATGCAAAAAGGCGGGCGGGCAGCCCGCCA
GGCCCGGATGTTCATCAGTTACAGCGAAGTCAGCATAAAAAATCCCGACAACAGCGGCCA
GGCGCTCCCGCTCACGTATGTCTGTTGCCGGGAGCAGGCAGAGGACGGCGCCTGCTGGCA
TCTGCTGACGTCAGAAAAAGTGGCGAGTGCCGCCGATGCGCGACGTATCGTCAGCCATTA
CGAGCGACGCTGGCTGATAGAGGAATACCACAAGGCGTGGAAAAGTGGTGGTACATGTGT
GGAATCGCTGCGAATGCAGACCCGGGATAACCTCGAGCGCATGGTGGTTATCAAGGCGTT
TATCGCGGTGCGGGTGCTGGGCCTGCGGCAGGGCGGTATCAGTGAAGAAACACAAAATGA
CAGCTGTGAGAAAATACTGACGCCGACAGAGTGGAAACTGCTGTGGGTTAAGCTGGAAGG
AAAACCGCTTCCGTCACAGATGCCGACACTGAAATGGGCCTGTCTGAAACTGGCGAAACT
GGGGCGATGGCATGACAGCAAACGCACCGGTCGCCCCGGTTGGGTAGTCATGTGGGATGG
CTGGTTCAGACTTCAGGATATGGTTGAGGGTTACCTGGTGATGAAGTCTCTTGATCAGGA
GATCTGATCAAGAGACAGACAAATGCAGGGAGGAAACAGAGGTGAATCAGATGCCGACGC
TAACCGTCTCCGGTAGTGTGCTGCCGCCATCAATCACATTCTGTGTACCGGTTAAATAGC
TGGATTCATCCGATGCGAGGAAGGCCGCCAGTTCGCCGACTTCCAGCGGATCGGCGAGGC
GACGCATCGGGATTGCTTTCGCCATTTCAGTCAGCACCGATTCTGGATCTTCCGGGTTTG
ACTGGCGGGCAATGCTTTCCGCCATTGGCGTGCGAACGTATCCAGGGCAGATGGCGTTAA
CGCGAATACCAGACTGCGCGTACTCCACCGCCAGCGATTTAGTCAGGCCAACAATCGCCG
CTTTCGTTAAGGCGTACGCCGTTTCACCCGGGTCTGCCACCATATCGCCAGTAACTGAAG
ACATCATCACAATGCGGCCATCTTTGCGGGCAATCATCTCCGGCAGCACCGCCTTCGTGA
CGTTCCATACGCCTTTTATATTGATATCAATATGGAAATCGCGATCTTCATCGCTCATAT
CGAGGAAACTGCCCAGACGACAAACGCCTGCGTTATTCACCAGAATATCAATGCGCCCTT
CTTTTTCCTTAGCGCGCTTAATAGCTGCGGCTACCGACGCCGGGTCACGCACATCGGCGA
CAACCGCCGTACAGCGATGACCACGACCACACAGTTCGTCCGCCAGCTTTTCGATCTCAG
GGGAGATATCCAGCAAGATTAGGTTTGCGCCATGACGCGCAAAAGTTCTGGCAATTCCTT
CGCCAATTCCCTGCAATGCGCCCGTAATCAGTGCTGTCTTGCCCGTGAGTTTACCCATTT
TAATGCTCTCCTTGTTAATACAGAGCGTTACACTCCATTCCCTCTGAAAATACAGGATAA
ACAAAATATTGCTGCGGATCAGCTCACTAATTCAGGAAAATCTCAATTTAGTCGCTGCTT
TATGCAGCACCTCAAGCGTTACGTCAGCGCGCAATCATTTTCAGTGACATCACATGAGTA
ATATTCGGACTTAATGATTCCTTTGTGTCTATCAAATCGGGATATATGATCCCATTTATC
TGCAATTATTTGATCGCAAATATTAAGGTCACCACCGATGCAACTTGAAAAGATGATTAC
CGAAGGCTCGAACGCCGCCTCGGCTGAAATTGACCGCGTATCAACGCTGGAAATGTGCCG
GATTATCAACGATGAAGATAAAACCGTACCACTCGCCGTTGAGCGCGTACTGCCGGATAT
CGCCGCGGCGATCGATGTTATCCACACCCAGGTAAGCGGCGGCGGCCGTCTGATTTATCT
CGGTGCGGGAACATCCGGTCGTCTGGGAATTCTGGATGCCAGCGAATGTCCGCCGACCTA
CGGCGTGAAACCGGGCCTGGTAGTTGGTTTGATTGCTGGCGGCGAATATGCCATTCAGCA
CGCGGTGGAAGGTGCGGAAGATAGCCGGGAAGGCGGTGTTAATGATCTGAAAAATATCGG
CTTAACCGCGCAGGATGTGGTGGTTGGTATTGCGGCCAGCGGACGCACGCCGTATGTGAT
TGCCGGACTGGAATACGCACGCCAGCTCGGCTGCCGCACAGTGGGAATTTCCTGTAATCC
CGGGAGCGCCGTTTCAACCACCGCTGAGTTTGCCATTACGCCAGTTGTTGGGGCCGAAGT
GGTCACAGGTTCTTCGCGAATGAAAGCAGGTACGGCGCAGAAACTGGTGCTCAACATGCT
CTCCACCGGGCTGATGATTAAATCCGGCAAAGTGTTCGGTAACCTGATGGTTGATGTGGT
CGCCACCAACGAAAAACTGCATGTGCGCCAGGTCAATATCGTCAAAAACGCTACCGGATG
TAGCGCAGAGCAAGCGGAAGCGGCATTGGTTGCCTGCGAGCGCAACTGTAAAACGGCCAT
TGTGATGGTGCTGAAAAATCTCGATGCCGCAGAAGCTAAAAAACGCCTGGATCAACACGG
CGGCTTTATTCGTCAGGTTTTAGACAAGGAATAACCCATGGCCAAAGAGATCAGCAGTGA
ACTTCTGAACACCATTCTTACCCGTGTCGGCGGACCGGGAAATATCGCCAGTTGTGGTAA
CTGTATGACGCGCCTGCGTCTGGGTGTACATGACAGTTCACTGGTTGATCCCAATATCAA
AACGCTGGAAGGCGTGAAGGGCGTCATTTTGACCAGCGACCAGGTGCAGGTCGTTTTTGG
GCCTGGTAAAGCGCATCGTGCCGCAAAAGCGATGAGCGAGCTGCTGGGAGAAGCACCGGT
ACAGGATGCCGCAGAAATCGCCGCTCAGAACAAACGTCAGTTAAAAGCCAAACAAACCTC
CGGCGTGCAACAATTTCTCGCCAAATTCGCCACCATCTTCACGCCGCTGATCCCCGGTTT
TATTGCCGCCGGTCTACTGCTGGGGATAGCGACGTTAATTGCCACGGTGATGCACGTTCC
GGCAGATGCTCAGGGCACGCTACCCGACGCGCTGAATTTTATGAAGGTGTTCAGCAAAGG
TTTGTTCACCTTCCTGGTGATTCTGGTGGGCTATAACGCCGCCCAGGCATTTGGCGGCAC
GGGCGTAAATGGCGCGATCATCGCCGCGCTGTTTTTGCTCGGTTATAACCCAACTGCAAC
CACCGGTTACTACGCCGGATTTCACGATTTCTTTGGTCTGCCTATCGATCCGCGCGGCAA
TATTATCGGCGTGTTGATTGCCGCGTGGGCCTGCGCCCGCATCGAAGGCATGGTGCGCCA
CTTTATGCCCGACGATCTCGACATGCTGCTGACCTCGTTAATCACCCTGCTGATCACCGC
TACGCTGGCCTACCTGATCATTATGCCGCTGGGTGGCTGGTTATTCGAAGGCATGTCGTG
GCTGTTTATGCACCTGAACAGTAATCCGCTCGGTTGTGCGGTTTTAGCCGGGCTGTTCCT
GATCGCCGTGGTGTTTGGCGTGCATCAGGGCTTTATTCCTGTTTACCTCGCGTTAATGGA
CAGTCAGGGATTCAACAGCTTATTTCCCATCCTCTCGATGGCAGGCGCGGGCCGGTGGGC
GCGGCGCTGGCACTCTACTGGCGGGCGCAACCGCACAGTGCATTACGCAGTCAGGTACGC
GGGGCGATTATTCCCGGCCTGCTGGGCGTTGGCGAACCGTTGATTTATGGCGTCACCCTG
CCCCGCATGAAACCGTTTATTACCGCCTGTTTAGGCGGCGCGGCGGGCGGTTTGTTTATC
GGATTGATAGCCTGGTGGGGTCTGCCGATGGGCTTAAACAGCGCCTTTGGGCCGTCTGGT
CTGGTGGCGCTGCCGCTGATGACTTCCGCACAAGGCATCCTTCCGGCAATGGCGGTTTAT
GCTGGCGGGATTCTGGTGGCATGGGTTTGCGGGTTTATTTTCACCACGCTCTTTGGCTGC
CGTAACGTCAATCTGGACTGATAATATGAAACGGACAATGCTCTGTCTTTCTCTGCTGGC
TGTCAGCTGTAGCGTCAGCGCCGCAAAATACCCTGTTCTGACAGAAAGTAGTTGATCAAG
TGTATGCGGCGTTAAAGCAGTAATAAAAAGGCCAGTCAGTTGTGTTACTGGCTGGCCTTT
AATCATCGAATCAGAAACGATTACAACGCCATCAACTTGTCCAGCGACGGCGCGAAGTAA
TAGCCGCCAGTGACCGGTTTGGTGAAACGCAACATCGCATCACGTTTGCCATCGGTATCG
CCAAACATGCTCAGCAGTTGCTGCTCAATGTTATGCAGACGCGCGCAGTAGGCGCAGAAG
TACAGACCGTGAGTGCCACTGGCGGTGCCGTACGGCAGGCTCTGGCGAACAATCTTCAGC
CCTTTGCCATCTTCTTTCAGATCAACGCGGGTGAGGTGAGAGGTTTCCGGACGTTCGTCG
CCGTCAATCTCTTCGTTGGCCTCTTTGGTGCGCCCGATCATCATCTCCTGATCGTGAACG
CTCATCCGGTTGAGCTGCTTCAGGTTGTGCTCCCAACGCTGCACAAACACATAGCTGCCG
CCGGCATCCACGCCGTCTTTGATAACCGCCACTTCGCGACGCGTCTCTTCACCCGCCGGG
TTTTCTGTACCGTCAACAAAGCCGCTCAGGTCACGCTCTTCAACCCAACGGAAGCCGTGG
ATCTCTTCTTTCACTTCAATGCAGTCACCAAAGGCTTCCATCGCCGCCTGGGCAACAGAG
AAGTTTACGTCGTGACGCAGAGAAAGGATGTGGATCAACACATCGAACTGGGTCGTCGGT
GCAAGACCTTTACCGTAGCCCGGAAAATCTTTCAGCTCTTCGGCCCCAACGCCGCCGCTC
AGAGCGCGCCAGGTATTGTTACCAAAGGCAACCACCGCACCAAGATGCGCGTCCGGGAAT
TTCGCTTCAAAAGTTGCCAGTTTGTCGGCAAATGTTTTACTGGCCGCACGCAGGGCGTCA
ACTTCCCCTTTCACTTTGGCTTCGATCCAAATCGCCGCGCGGCAATGTTCTGGCAAAATG
CCACTCTGAACCTGAGACATTGTTCCTCCTGAAAATAAGAATGCCACGCAATCCGTGGCA
TTGTTGGGCGCTATTTTACGTGTTTTTTCGCGGCGGCGGTTTGTTCAGACGCAAATTAAC
GCCGCCAGATAATTTTACTGACTTTCCAGTTTTTCAGGGTATCGTCCGAAGGCATTAACC
CTTCAGGGCCACTCCATTCCCCGCTGAACTGGTAGCTAATATGTTGACTGCCTTCGGCTT
TACATTCGACGGCACGATTATCATCACCATCAGCTTTTTGGCAATTGCCAAATGCTTTGC
TGTAAAGGTCGCTAAACGGTGTACCGATTTTAACACCGGTGTCAGCAGGAATATCGCTAT
CCAGCACATCAATGCGGCTGATCGTACCCTGATCGCCGTTAATCACCATCGCCACGTTGT
CGCCTTTCATCACTTCAAAAAGCGCACCACGTTGCCGTTCGCGGTTTTCATCCCGCTGCG
CAGGCGATAATCGCCATCAAGCGCATCGGCAATGGGTTGTTCTTGCAGTGGTGTGGACGC
CGTTAATTCACCCACGCCCTGCTCGCTCACTTTGGTGGACGACCCAAACCAGTTCCACGG
GTTAGCGGCAGACCAGTTAACTGACGACATCGTGGAACAGCCGGTCAGCATCAGCGGCAT
AGCGCATAACATTAAACGCAGCGATTTCATGTCACTTCCTTTGGTTATTCAATAACGTTG
CTTGGAGTGCAAATTCACCAAAAAGTGCCGTTATTCTTTTTCTTCATTAAAACAAGCGCG
TAAACGTCGATTGGTCAGCAGCCAGATTAACGCCACGATATCCGCCACTACCAGCGCCAG
ACCGATACCGCTAACGGATTCACCGTTCAGCCACAGCCACGGTTGCCAACAAAGTAAAAC
CACTTGCGCCAACAGCAACAGAAAATAGAGCACATGCCAGATACGGGGAAATGAAGCCCG
CCGACCACTCAGCAAAAATGCCAGCACCGCCGGAATACCGGGAATCAACCCCAGCCAGAA
ATTATCGTGATCGGGATAAAACAGATTTAGCAGCGCAGTACCCTGCTCGCGCGACGCTCC
GGCAATGACAAACAGCACCCAGGTTCGCGCCTGAAGCAATAGCACAAGCCAGAAGAGCAA
GGGTAAACGCAGGCGACCGTGCGCATCATAATGGACAGGATGAAACTCAGTACTCTTCAT
CTTCAATCAAACGCTTACCCAGACTCAGCACGTCGGCGTGTTCATATCCCAGGCGTTCAT
ACATTCCGAGCACCATGTCGTTATCTTCCGGCACGTTGATCTGAATTTTCGGACAGCCGC
GAGCAATCAGCTTTTTCTCCAACCGATTAAGCAACGCATTAGCAATCCCACGCCCACGAA
ACTCGGGATGCACGCCAAGATAATAAGCAGACCCGCGATGCCCGTCATAACCGCCCATCA
CCGTTCCGACCACTTCACCGTTCACCTCAGCGACCAGAAACAAACTGACGTCATGGTTCA
TCTTACGCTCAATGTCCATTTCCGGATCGTTCCACGGACGCAGCAAGTCGCAACGCTCCC
AAAGGGTGATGACCTCTTCGAAATCTTCCTGGCGAAATACGCGTATCTCCATGGTATTCG
TTACCTTTTTGCGGGTTAAAAGGCTGATTATGGCGTGAACGGTCGAATTAGCCAATATCT
GACGAAAATCGGTTGAAAAAGTGGCATAATGGGGAGTTGTCAACTATTGAAATGAAAAGT
AAAACAATTCTCAACAGCAAACCGTCGTAACGGATTACGCGATACGATATAACATCTGGA
ACTTTATTATTACAACTCAGGCCGTATGAGCACTTTTAAACCACTAAAAACACTCACTTC
GCGCCGCCAGGTGCTGAAAGCCGGTTTGGCTGCCCTGACGTTATCAGGAATGTCGCAAGC
CATCGCCAAAGACGAACCGTTAAAAACCAGTAACGGACACAGCAAGCCGAAAGCAAAAAA
ATCTGGTGGCAAACGTGTCGTTGTTCTCGATCCAGGCCACGGCGGGATTGATACCGGAGC
GATCGGACGCAACGGTTCGAAAGAAAAACATGTGGTGCTGGCAATTGCCAAGAATGTCCG
TTCCATATTGCGTAATCATGGCATTGATGCGCGTTTAACGCGTTCTGGCGATACGTTTAT
CCCACTGTACGATCGCGTTGAAATCGCCCATAAACATGGCGCTGACCTGTTTATGTCAAT
CCACGCCGACGGTTTTACCAACCCGAAAGCCGCAGGAGCATCGGTTTTTGCCCTCTCTAA
CCGCGGTGCAAGTAGCGCAATGGCAAAATACCTGTCTGAACGCGAAAACCGCGCCGATGA
AGTTGCCGGTAAAAAAGCGACTGACAAGGATCACCTATTGCAGCAAGTGCTGTTTGATCT
GGTGCAAACCGATACTATTAAAAACAGCCTGACGCTTGGCTCGCATATTCTGAAAAAGAT
TAAGCCGGTGCATAAACTGCACAGCCGCAACACCGAACAAGCCGCGTTTGTGGTGTTGAA
ATCGCCGTCGGTTCCGTCGGTGCTGGTGGAAACCTCGTTTATCACCAACCCGGAAGAAGA
GCGGCTGTTAGGCACGGCGGCGTTTCGCCAGAAAATCGCCACAGCGATTGCCGAAGGCGT
GATCAGTTATTTCCACTGGTTTGACAACCAGAAAGCACACTCGAGAAAGCGGTAAGTGAT
GAAACCCGACGCACACCAGGTTAAACAGTTTCTGCTCAACCTTCAGGATACGATTTGTCA
GCAGTTGAGCGCCGTCGATGGCGCAGAATTTGTCGAAGATAGCTGGCAGCGCGAAGCTGG
CGGCGGCGGGCGTAGTCGGGTTTTGCGTAATGGTGGTGTTTTCGAACAGGCAGGCGTCAA
CTTTTCACATGTCCACGGTGAGGCGATGCCTGCTTCCGCCACCGCTCATCGTCCGGAACT
TGCCGGGCGCAGTTTCGAGGCGATGGGCGTTTCACTGGTAGTGCATCCGCATAATCCGTA
TGTCCCCACCAGCCACGCGAATGTGCGCTTTTTTATTGCCGAAAAGCCGGGTGCAGAGCC
CGTCTGGTGGTTTGGCGGCGGCTTCGATTTAACCCCTTTCTATGGTTTTGAAGAAGACGC
CATTCACTGGCACCGCACCGCCCGTGACCTGTGCCTGCCATTTGGCGAAGACGTTTATCC
GCGTTACAAAAAATGGTGCGACGAATACTTCTACCTCAAACATCGCAACGAACAGCGCGG
CATTGGCGGGCTGTTCTTTGATGATCTGAACACGCCAGATTTCGACCACTGTTTTGCCTT
TATGCAGGCGGTAGGCAAAGGCTACACCGACGCTTATTTACCAATTGTAGAGCGACGAAA
AGCGATGGCCTACGGCGAGCGCGAGCGCAATTTTCAGCTCTACCGTCGCGGTCGTTATGT
CGAGTTCAATCTGGTCTGGGATCGCGGCACGCTGTTTGGCCTGCAAACTGGCGGGCGCAC
CGAGTCGATCCTGATGTCAATGCCGCCACTGGTACGCTGGGAGTATGATTATCAGCCAAA
AGATGGCAGCCCGGAAGCGGCTTTAAGTGAGTTTATTAAGGTCAGGGATTGGGTTTAGCG
GACGCGAATTGCAACTCGAAATACTACGAGAATAAATAATAATGAAAACCACCCTCCCCC
TCATCGCCAGCATCTCTGTTGATGAACAGAAAAACAGATTGATCGAATGCTTCCGGGAAT
ATTGGGGCGTACAGCAGATTAACGACCGCCATGACAACATTGCACTCCGCGTAGGCAAAG
GTAAACATGGTTGCCACTTTATCTGGTCAGAAAAAATATCGATATTCATTATTACTGTGA
CCGTGAAATGTCGCCTCAGGAATGGTCAAAGATCGTGACGGTGATGACCGTCGCGCTGGA
TACCCCCATACCGCCCTATTATCTTGATAGAGATGAGAAAAGACATCGCACCACTTTGCG
GAAAACACATCGCCGGGGAGACAATAGTATTGGATGTTTTATCTACCCCTACAAAGAAGA
GGCAAATGGTGGGTGGGATTATAATGTTGAAAGTCTTTTCATTTACGAATGCGATTTCAC
GATACTGGCGGCAGGCATTAAGGCGTGCTATCCGCTCAATAATGGTGAACGCGCGTTTGA
TTATACGAGCTGGAATGAATTTACCGTTGCTGAATGTGAGAGAATAATTTCGTCCTGGCT
GGATGCAGGGCAAGAAAATGAGAGCTACACGCCATTCATTCAATACGTGGTTGAATGGAT
GCAGCCCCTTATGCGGGAATATGACACGATTATGATTGAAGGTAATCTCTAATCCTGGCC
TGCCCTGAACAGCTCTTCCAGTTCATCATCCGTCATCTTACCCAACCACTGCTCGCCGCT
GCCGACAGTCATCTCCGCCAGCGCTTTTTTATTTCTGATCATGTCGTTGATCCGCTCTTC
AAACGTCTCACGGGTCAACAGGCGATGCACCTGCACATTACGCTGCTGGCCGATACGATA
GGCGCGGTCGGTGGCCTGCGCTTCCACCGCCGGGTTCCACCATAAATCGTAATGAATCAC
CTGGCTGGCGGCGGTCAGATTCAGCCCCGTACCACCAGCTTTCAGCGACAGAATAAAGTG
GCGTACAGAACGGTCATTTTGAAAACGTTCGACCTGCTCATCGCGCTTTTTGCGGCTTAA
GCCGCCGTGTAAAAACAGGGGTTGTTCGCCATAACGCGCGGTAAGCCAGCTTTGCAGTAG
TTCGCCCATCTCTTTGAACTGGGTAAAAATCAGCACCTTTTCTGTTGTCTCTTCAATGCT
GTCCAGAAGATCCAATAACAGTTGCGCCTTGCCAGAAAGCGCCGCATCCATCTGCTTATT
TTTCAGATAGTGCGCCGGATGGTTACAGACCTGCTTCAACGCCATAATCATTTGCAGCAC
CAGCCCCTGACGCTGGAAGGCATCAGACTCCCCACGGATCACCTGCATCCCTTCGCGCAC
GACGGACGCATAAATTGCCGCCTGTTTAGTTGCCAGTTCACAGAAACGGTCGGTTTCAAT
TTTTTCGGGCAGATCGCTGATGATGGTTTTGTCCGATTTCAGCCGACGCAGCAAAAATGG
CGCGGTTATGCGGCGAAAACGTTCAGCAACCTGTTGATTACGATCCATCTGGATCGGTTT
CTCAATCTCCGAAATAAACGTTTTTAGCGGCCCCAGATAGCCACGCAGAGCAAAGTCCAT
AATGCTCCAGTATTCTGCAAGACGGTTTTCCACCGGCGTACCGCTTAGAGCAATAAACGC
ATCGGCAGGAATTGATTTTGCAGCCTTCGTCTGTGCCGAGGCCGGATTTTTTAGATTTTG
TGCCTCATCCGCCGCCACCAGACGCCAGTGCTGTTTCTTTAACGTTGCGGCATCGCTACG
CACCACGCCGTAAGTGGTGAGCAGGATATCCGGCATCTCATCGGACAACGCGCGCTTGCC
GCCGTGGTATATCGCCGTCGTTAACGTTGGGGCGAAACGAGCGATTTCTCGTTGCCAGTT
AGTCAACAAGGTGGTCGGCATGATAATCAGCACCTTACGCTCCGCCAGCGCGCCTGTCTC
TTTTTGATGCTGAATGACAGCGATAAGCTGAAGCGTTTTCCCGAGGCCCATATCATCGGC
CAGGATGCCGCCGATCCCCAGCGCCAGGTTATGCGTCAGCCAGGCAAAACCCGTTTGCTG
ATAGGGCCGCAGCGTGGCGTTAAGAGAAACGGGCTGAGAGGGCATACCAACCGAGGTCAA
TTGCCGAAGTTGCTCACGCGCCGCGCTATCCAGCATAATCGGCGTGCCTGCGTACTCACC
GGACAACGCCGTCTGCGTTAGCGCCATGCCTTTAATGTCCGGTGGATTTAACAGCTTATT
GCGCAGTCGGGCGATTTCGTCAGGGTCAAGATAGATAAACTGTTCTTTGAAACGTACAAT
CCCTTCGGCACTGTCAATGAGCGTTTCAAATTCAGTAACCGTCAGTTGCCTGTCTCCCAA
CGCAATGCGCCAGTCAAAATCGAACAGATTTCCCAGTTGAAACCCGCTGCTGCCTCCCGC
GCCGGAGGATGATTTCACCTGCATGCTGAGTCTGGGGCGTAATATTTTATCCAGCGCTTT
CGGCAGCAACGCCTGAATGCCCAGCATGCGAATAACGGGCAACGCGGTAAAGAGAAAATC
CGGCAACGTTTGTGCGGTGAGGCGCAGCGCCTGCCGCCCTCCGGCACGCAGATACTCACA
CAACGGAGGGTAGAATTCCGCCAACATCGCCAGCGTTTGCAGGACGGCCATCCGTGTATT
TTCGTAGCATTTTTGCCACAGAATATCCGCCAGCATCACTGGCGCGGGCTGGTCCGTTAT
TTTCACCGCCAGATGCAGCGCAAAGTCTTCCCCGGCTTCATCCAGCATAATCACTGGCGG
CTGCTCGCGATGCACCAGCGTCAGGCGCGACAGCCATTGTGCGATACTGGCGGCGCTGGC
GCTTTCCCGTCGCGAGTCAAATGTCACCCGCCCGGTGAGGAAAAAGAGCTTGTCATATGG
CGTATCGCCTTTCTTCAGGGGAACCGACTGTACCAACCGATCAAGCATCAGCGAGCACAA
GGTTATAGCCTGCCGCTTGCCGGTAAGCGCCCAATCGTTAAAAGAGATCAACCCGTCCGG
CAATTGTCGGGCGACCTGTTCGAGCAAATTATCGACCGTTACATCCAGCGTAGCTGGAAG
CCAGCGAACCAGCGTCTCACTTTCACAGGAAAAAACCTGTGGCATAACTGCGCCTTTCGC
CAGCAGATGAACAGCGAATTGCCAGGCCAGGTGTAAACCTGCGACGGAAGGTTGCAACAT
CTGCAAGCGTCGCGGGGTCAAATTTTTCAGCTCCCCCAGCAGCGTGGAGAGATCTTTAAG
ATGCGTAATACCCTGCACGCAACAGCGGTAATCCCCGTCAATTCTGAGCATCGGGGATTC
GGTTGCTCCCAGCGCCCACTGCATCTGGCTCTCTGATTCAGGAACAATTTTTTGCAATTG
CTCCCCATAACGAACAAGGCGTGCCAGTTGTTGGCTGTAAACCTGATGAAAATCACCAAA
GGGATAAAAAACCGGATTATCGGGCAACAGTCGCAACAGATCGTGGTGTAAAGCAGGGAT
CAGGGTAAAATCCAGCCCCTGATTCGCTTTTTCCTCATGAACAAAAGGTTGATTTGCGAA
TAGCGCTGACAGCGAGGGGGAGTGATAAAGATCTTTTTGTCGATGTCCATTCCACGCTGG
CGCAATGCGGTCGGCAAATCCAGACCATGTAGCGCAAAAACCAGAAACGGATCGCTGTCG
ATCTGGCGACTGATCAGATAAATCACTGCGGCCAGATGTTTACAGGGCACGGCCCAGTCG
GGGCAGTTGCAATCCATATGAAGATCTTTCCAGCTCGCGGGGAAAATCTTGATATTCGTC
TCATTCGCCAGATCCAGCACCGTTGGCGAAAGTTCGCGATTTAATAACTGCGAGATAATC
AGCGGATCGTTGACCAGCGCATCCAGCAGGCGTTCTTTTTCCTGCCCGGAAAACGGTGGA
ACGGTAATTTCAACCGTATAAATGTACGATCCCCGCACTTGCGCACGGATGTGACCGTCC
TTGATATCAAGCTTTTGCACCGCCCCTTTATTCGCGTAGGTACGACCGCGCGGTAAGCGG
TTGTCGGCATCAATATGCATCAGCGCGTTTAACCACTGCTGACCCCACCAACTCAGTCCA
TAAGTCTGGATCGCCATATCAGGCTAACCTCTTCAGTTTTCGGCGGGTTAAATTTATCAG
ATAATCTCGTGGAGCAGTATTATCCAACGTAATCACATGCATGGAGCAACCTCCACGAGC
GAACGCCTCGCCTGTAAAAACCCTGATTGCTCAAACCGTATTCTGCCACAAACCGCAGCG
CGCACCGGTGGGTTTTGTATGCCCTGCATTCAGGCCCAACAGCAGCGTGAACGCGATGAA
TATATCAGGAAAAATAAAAAGACCGTGAATGCGTTTGCAGGGTTAAGCGATCCGGTTGCC
ATGCTGAAATTAGTTCACCAACCGCGAAAATTCGATGCGTTAATCGATTGGACTCCCTCC
CCCATTCGCACCGATGCCCTGTATCAACAACTGACCGCCGATCAAGCGCAGCAGATAGCT
GATTACGCCACAGAACGCTTTGTATCTGGTGAATATAAGCTCGCTCAGGAGATTTGGCTT
TGTCTGGCGGCATTTACCCAGGCCAATCTGGATGCGTATTTCAGAGAATGGATCTCTTAC
GATGATTTAGACAGTTATTCTTACATGCCTTTCCACCGCGCCCCTGTGGATGTTCGCGAT
ACGCTGTTAGAACGGGTTGAGGTTGATGCAGACAACAGAAACTGTATTCTGCAATGTCTG
GCATGGATTGGGGATGACGTTGTTGTTGAGCATTTTTCCCGCTGGCGTCTTAACCCGCCG
TCGTGGCGCAGTTCACTTTACATCGCGCCAGAAGAATATGCGCATGAGGCCGGTTGGGAG
CTAACCGTTGAAGGGCAAAGGCGTAATCTCTATTTTCCTCAATGTTTTCATCTGGAGATG
AAAAACACCGGGTGTTGCGAAGCTTTGCGTGTTGTTGATGAACGCAGCGAAACCTGTCCA
AATTGCGCATTGCCACTAACAGATCTTTTCGACGTTGACCTGAAGGCAACGGGTCTTAGC
GATAACGGCAGGTTTCGCGTCGTGACTTGTGAATGTTGCACCGCCTACAGCACCATTTTT
GGTTACATAGACTCACGGGGTAATGCTCATTTGTCTGCAAAAAATATCCCGCCAGCCTGG
CTGCCGGATGATGTATCTGAATGGCGTCGGTTACCTGTAAACAGCATGAGACGGGGAAAC
CTTCGACCACCGTTATTCGCCGCAGACCAATTTTTACCTGTCTCTTTCTCGCAACTTGGC
GGGCATCCAACCTGGATTCAGGACGCGGAATATCCTCTCTGCCCGGAATGCTCCCGCTCA
ATGACGTTTCTTGCGCAACTGGATTATGCCGATATTGAACAATACGGCGAAGGGATAATT
TACGCGTTTATCTGCCCGGAGTGCCGGACAACAGCGACGTCTTATCAGCAATCTTAGAAA
TTGTTTTGCGCCAGTTTGCTCATGGGAGCATTTAAGAATGTCAGACACATCACATAAAGA
AAGTAAATGGCACCCTCATCTGGATATGAGTTTTCTGGGATGCGTGCTGGCATTTGCTAT
GGAAGTTTATTTTGAAGAACACATTTTTATTCCCCACGGTGGAGGAGCAAGTTTTGGATT
GATAGCACTCATCGTTATTAATTTTATGACTATCCCGATAGTGATCGTGGTAACAACACT
ATTTTGTTATTTATTTGAAATTTCGCGAAAGCGTGTAAATCGTATTTTGATATTCCTGTT
GGCATGTATTTTGACTATTATCGGTTTGTTTATCGCATATCCCGTCGGGCAATAAAAAAA
CAAAGCAACTCAATGTAATTGATAACTTCACTATTGGCCGGATTAAACACCATCCCCATC
CGGCCCCTCAACCTCACCCCCACTCTCTCATCCGCTGATGCAGCGTCAGTGACGGCTTCT
CGGCAAACAGTTGCTGATAATCCGTGGCAAATTGCCCAAGATGCCAGAATCCCCACTGCA
TGGCGGCGTCTTTTACCGTTGTGCTTTGTGACCACGGACTTATGAGTTCGCGGCGCACGG
CGTTCAGGCGAATACGTTTCAGCCACGCGTTCGGACCAATGCCCAAAATGGCGTGAAACG
CGTTTTGTAGCGTGCGGCGGCTGACATGCAGTTGATTGCACAACTCCAACACCGTCACCG
GTTCGGACATGTTTTCCAGCACATATTCACGGGCGCGGGAAAGCAATCGACGGTAACTCT
GATGACTGATGCTTTCCGCCGTCATCATCGGCTGCGCTTCTTCCAGCATCGCCCCCATCG
CCATTAGCAAATTATCCCCCAGCACTTTTCGCACTGCAGGCTGATGGAGATTTTCCGGGT
TCTCGCAAAACGTCGCCAGCGCCTGTTGGACAAAGCCCCACAGAGCGGCTTTATGCTGCT
CTTTCACTTCCTGCGCCGACTGGCTACGCAGCATATGTAATACCCGATCCGGATTATGCA
AAAAGTTAGCCTGACGAGTGATGACATCTTCAGAAAGCACTACGCCAAGGATCGTGTAAT
CGTCCGGCGTACTTAATTCAAACTCGGTTCCACCAGGGCGCGTCGCAATTTCTGCGCTTC
CCAGACATTGCGAACCGATAAATCCCTGCTCACCGCGCGTCGCCGGAATGCCAAACCAGA
ACGAGTTCGGCCAGACCAGGCACGACTGACGCAGCGCCAGACCAGTGTATTCACGAAAAA
CCTGAATATCATCGAGTAGAATTTCCGTAAATTCACCATGAAACTTGCCCGGATGCAGCA
GATCGTAAATCTGCTGCCAGGCGGTAATTGTCAAAGCATGTTCATAGACGTCCGTTGTCT
GTCGTTGATGAACATTATCCACTTCGACCTTCGGCGTGAACTTCAGGTTTTCGGGTAAGG
GTTCATGATAAAGATGGTGCAAATTGGCTGTACGGGTCTTTTTCATGATGTTAATGCCGG
GTGTTGTAGGACACCCGGCACCTCCGACAGGTTAATGGGGCTTGAGACGGTAACGACTAC
TGCGTTTACGTAACGTCCCGGCAGAAAAGAGCTGTTCGAGCGCATTTCTGGCTTTTTCCA
GCGGCCAGCCAAAGTGGGCAGCCACTTCTCCTGCCGTCATTCCCTGACGTACTGATGTTA
ACAGCGCCAACAACTCGTCAGCAGATTCCGCGACGATAACTGGCGCGTCGGGTTCCTTTA
CGGGTTGCTTCGGCTGGCGGTTAAAGCCAGTAACCAGCCACTGGGTGTCATCGTCTGGCC
GACCGATCTCCTTACGGCTGATGACACGCCCGGTACGCATCGCGGCAGCACAACCTGCGT
CCAGCGCCGCACGACACGCCGCCAGATCGCCTTCCACCACCAGCGTTAGGCGACCAGGGT
CAAGCACTTCGTGACTGAGCAGACGAACGTTAGCTGCTTTGAGCATGGCATCAGCTGCAT
CTATCGCGGCGACCATGCCGTCCACTTCCAGCAATCCCAGTGCATTGATCATCGGCAACC
TCCGTTACGCACGCTGGATTGGATTACGCGCGATTTCCAGCACTGCATCGGTAAAGGCGT
TACAGGCTGCTTTACACGCGGCCTGGCTACCGGTTAAAAATGCTGCCGAGTAGTTGGTTT
CAGACGGTGGCGGGACATAGGTCACCAGCTGCACGTCGGCAGATTTCAACGCTGCATCAA
TGCCGTAGGTCGCTTCCAGCGGCGGTGCCACCAGATACGCCATCGGATCGCCAAGCGTGA
TCCCGGCGGTTGATGAGAGATAAGAACCGGTACGCGAAACTACATGTGCCAGGAATGCCG
TATCTTGCGCGTCGTTAGCCCACTGGAAAGCCGCGCCATTTTCAATATGAGCAACCATCG
CATCCAGACCAGCACGCACTTCCGCCGGGTTTGGCCCACCAAGCATAATCAGCACCTCAC
CGGCAGTCGGTGACGGGCCGTGTGCGGCTCCCGCATACAGCGAGCGGCCATACACCACTT
CCACCATCGCCTGTTTGGTCGCTTCATCAGCCGCAATGTAGGTGACGTCATCGGAATCAG
CAGAAATCAGCCCGAGGCTACGAATATGCGGCGGCAATTTCAGTTCACGCGCAAATTCGG
CGTTAACGGAGGCAATCACCCGCATGGCGGTTACCGACGGTCGAATCAAATCTAAAGCTG
GCATGATGCCTCCTTATCGGGTCATGTTGATGCCGGATGCTTTCTGCTCCAGCATACGTT
TCGCCAAATCCACAATGACGGCTGCGGCTTCAACCGGCGGCGTGCCGCCCTGGTGAATGT
TAGAGATACAGGTACGGTCGGCCTCAACGGTGGTTGCCATACGCGGCGAGTAAACGGCGT
AGCAGGAGAGACTTTCTGACTGCCCCAACCCCGGACGTTCACCCACCAGCAGGATCACCA
CTTTCGCGCCAAGAAGTTCGCCAATCTGATCTTCAATCTTCACGCGACCGTAACGCACAA
AGAACGGTGTGCCGACTTTCAACCCGGCCTGTTTCAGGCCCGCCATCAGCGGTGGCAGGA
TCTCTTCGTAGTTCACGGTGATCGCATCAGTTGACAGGCCATCAGAAATAACGACCTGTA
CGTCCGGATTAGCAACACACTTGTGGGGTAGTGTTCAATTCTGGGCGGAGTTAGTGCAGC
CTGGTAGAACCGGCAAGCCTTGTGTGGCGCGGGGTGTGGTGATTTAGCGTGATTCTGGGC
GGATTTGTGAGAAATGACCAAAAACGCTTTTTTTGCGCTTTTTTCTGGGCGCTTTTGATC
TGGTTCTGCTACAAACTTAACGGGTTTTAAATGCTTTTAAAAAGAGTTTTATCCTTACCC
GTTTTCCTCAATTTGTTCTCATCTGTTGTGTTCAGTTTTGTTGTGGTTATTGCTGATTAG
CTAACAGCACACGCCCCGCCAAAACGAGGCGCTTATGCTGATTTCTTGTTTACAGGCTTA
GTTTCTTGCTCCGGTGTGACGGGAACGCGATCACCTGGTGTTCCAGCACAGAAAATGGCT
TTGGCGCGGCGCAAAATCTCTTTGTCATTTTCCTCATCGCCAGCTAATGCCATGCAAACA
GCGTCTTTAAGCGATTGCCTGATGTTCAGGCTTTGAATGGCCTTTCTTTGCTCCTCAAGT
TCGCTATCGGCTTGCTTAGTTTGCCTGGTGGGTTGCTGTAGGCGTTCCAAGATTCCTTTA
ATGCCCATATCGCATATTGCACTTATCAGCTGTTCCTTATCTTCTGTGGACGCTCTTTTC
AATAACTCGTTAACTAGCTCGTTTGTAATATCGGGAGAAGGCTGCGCTGTTTGATTTGAT
AGAGAACTTTCTTTGGCGATGGGTTCCTCACCGTAAGCAAGCCAATTTAAGCTCACTTGT
TCTTTATCTGAGATAAGGCAAGCTATTTTAAAAGAAGGCTCTGTTCCTTTATGAATGTAG
TTGTTTAAGGTTGAAGGGGGATTCCCCAATCACTCGCAGCAGTTCTGACACTACGGTTAC
CTATCAGCTTTACTAAACGCTCTCTGAAACTTTCTTTTCCCCGGTCGACAAAAGAAAAAG
CATCATCATTTCTAGTCATTTTTTCTTTCCTCTATAACTCATTGATTTTAATTGCAAAAA
CCATATAAAGACCAAAATCAAAAAGAAAATACAAAGAAAGGGCTATTTTTGCTTTACATG
GGCTATATATGGATCAATACTTATATCCGAAGGGATAACACGGCGGTGTTATCCGCACAG
ATAACTTTTAAGGGTAACCTAATGATGGTTAGAAATGAAGTAATGAACAAAGACTGGCAC
CGCGAGTACATCGTTGCCGCTGTGCACACCAAAGGTTTTACATTGCGTGAACTTTCTGAA
CGCGCTGGTCTAAAAAAGACTCTTTAAAAAATGCACTGTATCGCTCATGCCCTAAATATG
AACGCATCATAGCCGATGCTATTGGTGTGGAACCTGCGGAGATCTGGCCAAGCCGGTATG
CCAGTAAGGCGGCGTAATGTTTTATTCAGCCAATGAGCTGGCCGGTCTTCCTGGTTTGCC
CGGTACAGTTCAGGGGTGCGCTGGACGCTCAATCGGATCACAGAGACGCACCCAGAATGG
AAGCGCAAGCGCGAAGGCACCAAAGCATTCGAGTATCACATCGACTGCCTGCCCGCTGAA
GCGCAGAAAGTTTTACGTAAGCGCCTGACTCATCAGGTCCTGGAAGATGCACAACTGCCC
GCCGTAGTTGAGCAGAAAGCAGTTAAAAACGTCGCCGTTCGCGATGAACTGGAGGTGATG
GTCAAATGCCCGGAGCTGGCATTACGCGAAGTCCAGTCACTGACCGACAAGCAAAAGGCC
ATCGCTGATGCGCGGATATTGCTGGCTACTGAAGTGCATAAGCTGCGCGAGTATGCCGGA
ATGACCAGGAAGGCCGCTTTAAAGCACATCGTTGATGGTGTGCGCATGGGGGCGTTACCT
GACCGCATTATCGAAGCAGCGAATACTGCAAATGCACGTCAGGGAAAGCGAACCGGTGTC
AGCACCGGCAGCCTGGATAGCTGGTACTCCAGCTGGGTGATGGCGCGCGGTGATGCCAAT
CAGTTACTGGCGTTACTGGCTCCCGGTCATCATAAGGGAACACCGTGGGAGCAGGTCTGG
TGGTTGAGCGATTTCTTTATGTTCTATCGCTCATGGAAGCGCCCGACTGTTGAATATGCG
TATCGTGAGTTTTCAGCCTGGTGGCATGAAAAACACGCGAATGATGCGGGAATGCTGGCG
GCACTGCCTTCAGTTCACGCAGTAAGACGGGTGTTAAGCAGCGTCCCGGTGATTGTTAAA
GAGCGTTTCCGCTCCACCGGTTCAGCCTGGCGTTCGCTCAATCCCTTTGTGCGGCGCGAC
TGGACATCATTACCGGTTAATGCGGTATGGGTCGGGGATGGTCACTGTATGAAAATGACC
GCGTTTAACCCCCTGACCGGCAATATTTTCCGGCCAGAAGTGACGCTGGTTATGGATGCG
GGGCAACGCTTTGTTGTGGGCTGGTCACTGTCCCTGTCGGAGAACGTGATAGCCGTTGCT
GATGCGTTACGTTACGGCATGGCGCAGCACGGGATACCGCTGATTTATTACTCCGATAAC
GGGGGCGGTGAAAAAACCGGGTGCTTGATGCCGATATTACCGGGATTCTGCCCCGGCTGG
GTGTGGAACATCACACGGGGATACCAGGTAACCCGCAGGGGCGCGGGGTGATTGAACGGG
CAAACAAAGGAATACCCAAAGACGTGGCTCTGAGTTTCCAGACGTACTGCGCAAGGGATG
CAGACAAGGAAACCGTAATGATGCAGCAACGGATTATGCAGTCAGCCATTAAGGCCACCC
ACAAAGGGAAAGAACTGACAAAACGGCAGGTTAAGGCGAGGGATGAAATCCCCACCTTTG
AGCAACTGCTGGCAGCCATAGAGCTGGAGGTCAGACGCTATAACAACCGGCCACACAGCA
GCCTACCCCGCAAAGAGGATGGCGAATATTACAGCCCGGCAGCGTATCGCCGGAAACTGA
TAAAAGAGCAGAATGTTGAAATTGATTTCCTGTCGCCGGAAGAACTGCATGAAATGTTCA
GACCGGAAGTGACGCGCAAAACATTTCGCGGGGAAATTCAGTTATTCAACAATATTTATT
ACTCATATGATCTGGCCGCAGAGCACGGGAATGAAGTCAGGGTCAGTTACGATATTCATG
ATGCAAACAGCGTCATTGTCCGGCGGGCTGATGGCTCTTATATCTGCGATGCCATCTGGA
ACGGTAACAAGGTTGATGCCTTCGCTAAACCAGTTATCGAACAAAAACTGGAGAAACGCG
TCAGGGGCCGCATTGCACGGGCTACGCAGAAAATCGAAGAGGCTAAACGCGAGCTTACCC
CGGCTATTACGCAGAAGCCTGACTTTAATCTGGGATATGGACTGGAGCGCCCGGAGAAAA
AGGAAAAAGAAGAACTTTATTTATTCGCATCTGAACGCGAGCGCAATTTAAAGAAAAACG
GCACAAACAACCGTTAATTTAAAAGGTATTTAATTATGAGTTTAATTACGCAATTAAATG
ACGTAATGGCCCGTCGCGGCTATACGCAGACCCACGTCGCCCGTGCTATTGGTCGTAGCA
GCGCCGTTATCAACCAGTATTTACAGGGTAAATATCAGGGCGATATGGCTGATATTGAAG
AACGCATTTCTGCCTTTGTGACCCGTGAGCGGGAAAAGGAAAACAGCCGCCGTATTAAAG
CGAAATTTGTTGCCACCGGTATGGCTGCCAAAGGACTGGAAGTGCTGGCCTATGCTCACC
TGGAATGTGAAATCTGCGTACTGTATGGCGCGGCAGGTCTTGGCAAAACAATGATTCTGC
GTGAATACGCCGCCAGAAACCGGGATGCGGTCCTGATTGAAGCTGACCCGGGCTATACAG
CCAGAACACTGCTTGAGGAGCTGTGCCGCCAGCTGGGGGTAAAAGTTCGCGGCAATATCC
ACGAACTGATTGATGCATGTGTGCGAGAACTGCGTGATTCCGGTCGCCTGCTGATGGTGG
ACGAGGCTGAACTGCTCCCCTATCGCGCACTGGAGGTTCTGCGCCGTCTGCATGACAAAG
CGGGTATCGGGATTGTCCTGGCGGGTATGCCACGCCTTCTGATTAACCTCAAGGGACGTC
GCGGTGAGTTCGCCCAGTTATACAGCCGTGTGGCGCTGGCGCTTAACCTGGGCGATACGC
TGTCGCAGGAAGATTTTAACCAGATAGCCACCGGGCTGATGCCGGAAGCAGTAGAACCGG
AAATCAGCGAGGCGCTTTACGAACGCTCGCTGGGTAATGCCCGCCGCCTCTTCAAACTGG
CGCGCGGTGTGTACCGGATTTGTGATATCAGCGATGCACCGGTCAGTGTGCAGGCCATTG
ATAAATTCGCAGAAATGTTAATTCACTGATGGAGAACAAGACGATGGACAAGCAGACCAT
TAACGCCGTCCGTTCCCGTGCCCGTGTGGCCATCCACACCACTGGTGGTCGTGTAACGGG
ACAACATCACCGTTTACCTGTGGTTTATGCCTGCCCGCCCGTGGGTGGTCCTGTATGGCC
GGTAACGGAAATCATCCAGACATTCAGCGGCCTGCGCCGCGTGGTGAAAACATCCTGTAT
CGACGGCTGCACCGTCGTATGGCAATGAGAGGAAATCAGAATGGCGGTCAAGTTAGAAGT
AATTATCTACACCGATGAAAATGGCACGCTTCGTGTCAGGAGTATGGGGGCTATTGATAA
AAAGGATTTACGGATGAAGAGGTCGGTGTAAGACAACGGTTATGGGAGGTAATGAATCAA
ACTCTTAATAAAGAATTTAACGGCGTTGATTTATTTTCTGTTGGCGTGGAACCCTGCGCG
CATAACACACATTAATCTGTAAATATCACTGAGGTAATTTAATTATGACGACTGAAAATA
AAGTTAAGCAATACACGAAAACTCAAGCGCCTGAAGGTTACTGGGTGGATGCCCGTGGCG
TAATGACACCTGAAAGCCTTATCAAAGATATTGACCGCGACCGCGAGCAGCTGGTCGGTG
AGCTTGTGGAGATGGTGATTGCTGCCTCCGCCTCACTGCGGGAACTGAAACTGCGTGCGT
TTGGTGATATTCAGGCGTTTATTGACCTGTCGGCGGAGAAATACGGCGCTGTGAAAGGCG
GTAAAAAAGGGAATATCACGCTTTACAGCTTTGACGGGCGTTACAAGATTCAGCGCGCCA
TGCAGGACCGTATCGCGTTTGATGAACGCATTCAGACCGCGAAGTCGCTGATTGATGATT
GCCTGGCTGACTGGACGGAAGATGCACGCCCTGAAATTAAGGCCATCATCAGTGAGGCAT
TCAGCACGGACAAGGAAGGCAACATCAACACCGGTCGCGTTCTGGCCCTGCGTCGCCTCG
AGATTGAGGACGAACGCTGGAATAACGCCATGTCGCTGATTGGTGAAGCCGTCCAGGTAA
TTGGCAGCAAAAGCTATATCCGCGTGTATGAGCGCGTCGGTGATTCTGCTGAATACCGCG
CAATCCCGCTTGATATTGCAGGGGTTTAACATGCATCAGGATATCAAAGAGTACAGGGCT
GGGAACCGTTGCGCAGCGTATTCGCTGGGCGCGTCCAGAGCAGAACAACGCGGCGATTAT
GCCGAAGCTGAAAAACTGTGGCGTAAGGCAGCACAAAGCCCGTGTAGTACCCTGCGCCGC
ATCTGGGCGGAACACCGGGCAGAGTTCTGTGCCAATGCTCACCTGAAAGGATGGAAGCCG
CCTCATGAACGCGAAACGCTTTAATCAGCTATATCCGCCAGGGACTCGCTTCATGCACAT
TGCACATCGGGCAGTGCGTGGTGGTCGGGTGGTAAAAACTGTTGCACCTGCCAGAGATTT
TAAATGTGGTTGTGTGGTTGAAATTAATGTCGAGCCTTATTTCGTTAAAGTCGAAACACT
GAAAGCACCGCATTAATTTAATTTGTTTTTAATTGTTATTTAAAACAGGCGTAAACCCGC
AGGGGCTGGCTTACGCCTGAATCTGAGGAAGTTTATTTATGAATATTGCTAAGCAAAAAA
ATTCGCCCGCGAAATTAATCTGACAATCGTTTGTTTTAATCGTCTTGCGACCAGTTCTCA
ATCGACAGCAGATGTTCATCCAGCGCCGCAGCCAGAACGAACTCCCCACGTTCCTGAAGG
CCGTGCTGGAAGTTGCGTAATTCAGAATCCAGGGCGCTGAGGTTCAGACAGCCATTTTCT
GAAAGCTGTTTAACCAGAAAGCTCCACGCAGCTTTGTTAGCAGTAATTGCTGCCGCAATT
TCATCATCAATCATTTTTTAACTCCTGATTGGGTATGTTGGGGCAGCGATTATGACAAGT
GTTTTGTGGTTATAAGTTGATCAAAAACAATGAGTTACAACCATGAAAGATAAATACATT
GCCAAAATCAAAAAACTGTTACGCCTTGCCAAAGGAACATCAAGCCCGGAAGAAGCCGCT
AACGCTATTGCAAAAGCCCAGGCTTATATGCGCCAGCATGGTATCAGCGAAAACGACGCG
GAATTGTTCGACATTCAGGAAGCTGCCAGCGCGGGTGCGCCGAGTGACGCCAGTACGCCG
CCGCGTTATATGCACATCCTGTGTGACCTGGTCTGTAAAGCCTTCGGTGTCGAGTGTTAC
ATCTCCGGCGAATACCGGGCTTCTGGTTCACTTAAACGTTACGTGCGTTTTTATGGTCCT
GACAGCCGCCCGGAAATCGCGGCTTACGCGTTTGATGTGCTTTCCCGTCAGATGATGGCA
GAGCGCAAGAAATATCAGGATAAACACTGCAAACGTTGTGGTCCGTCCACGCGGGTAGCC
CGTGGCGACCAGTTCTGCGAAGGCTGGGTCTTTGGTGCCCGTGATGTCATTGCGGTGTAT
GACGTCTCCCCGGAAGAAAAAAGCCGCCTTGAGCTTTACAGAAAGAACCTGCACAGCACT
AAGGGACTGCGCGACGGGGATATGCGCACAGCTAAAGCGTGTCGGGGTGCAGAGTTTGCC
GCTACTGCCGGTTTTATCGCCGGGAAGAACGCCAGGCTGCATCAGGGGGTTAATGGTCAG
AGCAACAGACCGCTGGCACTGGGGAGGGTGTAACGATGGCTTTTAAACTTCTTAGTGTTA
CCGAAGCAATATACCAGCCGCCCGGAGAACGCCACGAATACAGGATGAATGACGGTAGCG
CGGTGGTTGAGTTCCCCGGATATCCGGGGGCTTCCCGGTGGCGGTTCTATGACAGTGTGG
GACGTCGGATTATTAAAAGAACCGTGCACAACAATATGAAGGCTGCCGTAGAACGTCATA
AGAGAAGGTTTAACTGCAAATGAAAATTGAATTTTATGACCATGGGGTCACCGCAACTAT
CACTATTTCTTGTTGGTTCTGGGAGTTCCACCGTTACTTCAGAGTTGTAGATGCTGCGCT
GTTTGTTGCACCGGGAGCGTTACATCACAGTGGAATCGGTATTGTTATGAACACTGTCAT
CAGCGGTAAAACGGTCCCGATGTTGCGGGCGTTTAAAGTGGCAAAACAGGAGGCTGGCAA
TGGTCATTGATAAAACGATAACGATAGATGTAGCCATGAATACAGGTCTGGCGCTTATCG
GTTATGGCTATATCACTTTTATGTCATTCAGGTGGTTGATTTCTTCGCTCTTTAAGCAGC
GTGAAAAACATCGTTGTAAAGACAAGCGCGCGAAGGCGCTAAATGCGTTTAATGACGCTT
TTGATATTGACCATATGCAACAGGGCGACCCCGCACGCGTAATTACCCGGGGAGATATTG
TAATTCTTGTGTACCGGAATGAAAAAAATGAACAGGAGACAACCAGTGAGTCAGCAAACC
AGAATAAGCGATAAGAGTCTGACCAGACTGATTGCCGATGCGGACAAGGTGCTGGAGCGG
AACTCCCCCGTTGCCGATGAGGAATGGTGGCAGGATTTCCGGGCTGCAATGCTGGAACTT
CAGGAACGTCGTCGGGAGGTGTTGAAGTGAGTGAATTAAAGTGTCGAATTAATGGCAATC
AGATAGAACCGTGTGCGGTACTGGCAAAAGCACTCGAATATGGAAATCCAGCCTTTAAGA
GTAAAGGCATATTTATCCCGGAACGCGTGAATATAAACACCGGCGAGCCAGGCTTAGACA
TTGCTCAAATTCACTCCGGCCAATATGTCGGTCGTGGTGTTGCCATGTGTTTTTGCCCGT
TCTGTGGTGAAAGTCTGAAAACATGGAAAAAGGAGGCAACCAGTGAGCGAGATTAACTAT
CAGGCACTGCGTGAGGTGGCAGAGGCCGCGAAGGGGGATACGACGTGGCAGAACCTACAG
GCTTTTCATGCTGCGGCTACGCCGGAGGTTGTGCAGGCGTTGCTGGATGAAAACGAAAGA
CTGTGTCGCGATCTGATAGCTCGTAATGGTGAGATTGAAGGGCTTCGGGAGTGGGCAGAA
GAACTGGAGGCACGGGAGGTGGCTTTGCCAGTAGCGTCATGCATTGTTGAAGATGGATGC
ATGTGTGTTGATGGGTTCAGTGAGTATGTAGGTCACTCGCTACCTGATGGAATGCATGAG
CTTTATGCTGCCCCGCCAGCGTCGGTAGTGCCGGAAGGACTAGTTAAAGCAGTGCGTTTC
TATGAACAGGTAAAGTGTGAGAATCCGCCAGTCGAAACCGGAGCATGGAAAGACGCGGTT
GACTGGGTACTCAACGAGGCTTGCCAGGCTGTAAATATTGACGCCAAAGGAGGTGCGTAA
TGCGTGTAGCGTTTATCGGTTTATTACCATACCCGACTCGTTTTTGGGCTTCTGCGCTAA
TTGCAAAGCCACATGCCCTGATGGCTGACAGCATCATCCCGGCACAAAAGCGCCATACCG
GTATTGCTGCTGCACGACGCGAAGCAAAGAAACGCAGGAGAGCAAAATGATGAAAAACCG
TAAGGCAAGACTGCTGATAGCAAAGCCAGGGCAACTTATCCGTATCTCAAATCGACTTGT
TGTTCACTATAGATATCTTGGTTTTAGGGAGTGGTCCTCTATTCGTTTTTACGGTGTCTG
GCGAAACAGAAGCGCGACACAAAACCGCTGGAAGAATCACACTAACGCAAAGTAATTAAA
TAATAACCAATAGCAGACCAAAAAGTATTTTTTGGTCTGCCAAAAGTGATGTTTTGGTCA
TTATGAAGATTGAACAAATCGGAATGGCAGCTTTCAGGCAACAGGCTGAAAGCGGTGGCG
TGGATGAGTTCGTCGTGCAGCGGTTCGGTGGTGTGTATCATCTATTCGCTGTGAATCGCC
GCGCCGGGGTGTCCTATTTTCTACAGGAACGTCGTGGCGATTACAAGACATGGCTGTCTC
TTGACCGTGCCGCTGCGTTCTTGTCAGGGATTGGCGTTTCACGTTTTACCGTGCGTTTTG
AGGATAACAAACATGCTGAAAAAGATGATCGGGGCCATTAAAGCCGGTCAGGCGTATCTG
GGGTGGGATGATGCCCTTTATCGCCAGACGCTGGCCCGCCTGACCGGTAAAACCAGCACC
ACACGCTGCAATCTCGATGAACTGCGCATCATCCGGGAATACATGCACGAACAGGGATTC
CCGCGCAAGGCACCCGCTGGTAAAGGTCGCCGCCCTCGTGTTGCAATGAGCAGAAAATCA
GTATTATCCAAAATTGAAGCGTTGCTGGCTGATGCCGGTCGTTCCTGGGCGTATGCAGAA
GGACTGGCATCTCACATGTATAAGCAACATGTGATCGAATGGCTGACGGATGAACAGCTT
TTTGGAGTGATGGTGGCGCTGGTTAAAGATTCAAGAAGGAGAAATCAATGATGAAAAAAT
GGTTGTTTTGTTTAGTAGGGGTTATTTTCTCTTGTTCTGTGCTGGCACAGACAGAGGAAC
AGGCGCAAAAGGAACTGAAACGTTATCAGGATATGAAGCCATTGGCTGAACAGATGCTTC
GGGAAAGTGGAAAACTTTATTACGCTATGCCAGAAGCTGCATCGCAGTATCAGCAGGGAA
ATATTGAAGAGTGGAAGAATATCAAAAAAGGACTAAAACAACTGGATGAACAGGCCAGTA
AACTGGGGGACGACCCGCTTGATCCTGTGTATGGTTCCTGCATAAAAATGAAAAACCAGC
TACAGGATTACTGGTCTAACGTTATCAGGGATGACAGGCAGTTTCTGGAGCGTTCAAGAA
ATCAGTTTAAAGAATATCGTATGGATTGTTTTGATTCGTTTGTTTTTGGTAAAGAGCAAA
TAGAATCAAGAAAAGGCCTGGTTATTCTAGACCTGACTAAATAAGACTTAGTTTAGCCCC
TGCCATGCAGGGGCTTTTTTTGTGGTCTGTACAGGCGATCATGTATGGCTATAATAACAG
TAAGTTACTACCGGAGACGCCATCATGCAGACCTTCAGTGAAACAGATCTTCGCGATGCG
CAGGCACTGCTGCCCGATTCCGTGCAGCAACTGATTAGCGTGATTGGCTTCCCCGCCCTG
ACCCGGTTGATTCGTTCTTTTGGTGGCGTGACGTTAAGCGGTAAAACCGGCGTACACGCC
GAACGCACCGGCGGTGTCCATGCCCTGTTACATGACGTGCTCACCGAAGACGAAATCAAC
AAACTGATCCGCTTTCTTGGCGGTGCTCCGTTTTACATTCCCCGTTGCGATCATGCGTTA
CGTGCCCTGCGTAACACCCGTTTTATGGCTGATTTACAGCAGCATGTAAAAGACGGATGC
TCACACCGGCAGGCGCTGGCACTGCTCTGTCCCCGTTACGGCATTTCAGACCGGTACGCA
TGGCAGCTGATACACCGACGACAAAAACAGACTTCGCTGAAAAGCCCCACCCAGGTGGGG
CTTTTTGATTAATGGGCCTCAGAAAAAAGGAGACACTTATGACCAACTATATGGCACTTG
GCGAGTATACGGCCTACTCAGAGCAGGCCCGGGATGCTGCCGGACGTCGCTTTGCTTATA
TGAAAAATTTGGCCAGTCAGTTAAACCGAATGGCCGAACAACCGGATATGGTTGTTCAGG
AAGAAGCGTTGCAGTGTGCCATTGCTGACATCATCGCCAGCGAAAACGAGATGCGCGCAG
CGATGGAAAAGGCGAACGCCTCTGCTCCGCTTTGTAATAAACCTCTTATTACGCCGGATT
CTCTTTCCCGCTTCTGATTTATCACCCCGCCGCCGCGGGGTGCTGAACTCCCCAGCAGTA
CCCACCACACCAGACCGTTTACCCTGTCCACTCAGACCACAAGGCACCTTAAGGGATAGC
GCCCTGCAAAAGGCTTTTGTGCCTTTGACAGGGTGTTATTTACGGGCCGTCAGTGGCTCA
GATTTACAGGAGAAACTCATGTCTGAACCCTTATCAGGCGGCGGAGCTGTGGCAGTCACC
ATCGGTGGTGCCAGTGTGTTTGGCCTTCTCACCAATACCGATTTCGGGGTCGTGGTGGGC
GCGTTTGCCGGGGCGCTTTTTGTTGTCACTCAGCAGAAAGAAATCCCGGTATGGCGAATG
GCTATTCACCTGCTCGTCGCGTTTGTGGTTGGCGTTCTGGGGGCTGGCGTGGCTGCGTCA
CTGATGCAGTGGCTGACCCACTACAACGACAAACCGCTTGATGCATTGTGTGCGGTCGGT
GTCTCGGCGTTATCCATCAAGATACTGACCTTTCTTTATCAACAGGAAATTTCATCGCTG
TTCGGCCTGTTTTCCAGACTGCGCGGCGGAGGGGTGGAAATGGAAAGTAGCCTTGCCGGT
ATCGTGAACGTCTGGCTGTGTCTCGCCATTGTGCTGGGGTTGTTTGTGTATCGCCGCCAC
GGTGCGGCGCATAAACCGATGATTACCTGGCTGGCGTACTGGCTGATGCTCGGCTACATC
ATCATCCCGTTCCGCTGGCTGTCCGGTACATACACGCACTCCAGCTGGCTGGTTGTGGCG
CTGAATCTGGTTTTCTGTGCGCTTATCGTGTGGGCGCACGGGAATTTGTCAAAAATCCTT
TCGTTACTGAGGCATCCACATGAAATCAAAAGATGACATTTTTGATGAAGTCCTGGGCAA
AGAAGGCGGTTACGTCAATCACCCGGACGATAAGGGCGGTCCGACCAAATGGGGCATTAC
GGAAAAAGTCGCCCGCGCCCACGGATATCGTGGCGATATGCGCGATTTAACCCGCGAACA
GGCGCTGGACATCCTTGAAGCCGATTACTGGTATGGCCCGCGATTTGACCAGATCGCCGC
ATTATCCCCTGATATTGCCGCAGAGCTGTGTGATACCGGTGTGAATATGGGGCCAACCGT
GGCGTCCAGAATGCTTCAGCGCTGGCTGAATGTGTTCAATCTGCGCGGCAGGCTGTACCC
GGATATGGACGCAGACGGACGCATCGGGCCTCGTACCATCAGTGCATTGCGCGCCTTCCT
GAATAATCGCGGTCAGGACGGTGAACGGGTGATGCTGACGGCCCTGAACTGTACGCAGGG
GGACCGCTATCTGGAACTGGCAGAGAAACGCGAGGCTAACGAATCGTTTGTTTATGGCTG
GCTGAAGGAGCGCGTGGCGGTATGACGCGTCAGCACTGGACCCACAGAACGCCACGTAAA
GCCGCGCGCTGTGTTCTGGCCCTGTTTCTGGTGATGTTGCTTCCGGTGGGATGCACAGAC
ATTAACAGAGCGGGCCAGCTGTTTGACGCGGCGGCGCAGGTCTGCCGGATTATCGATGGT
ATCCGGCAGTGTTCACAGAACTGATTTTTTGAAGGTCTGACACAGTGAGCATTATCAGAT
TTACAGAATACAGAGGTTCAGGAGGTGCTGGCGCTGTCATGGTGCTCGCTGAACGCATCA
CCCATTTTTACCGTCAGTACGGTACACATGATGGCACGGTCATTGAACTGGATACCGGGA
AAAACGTGTTTGTTCTTGAAAATCCCGACGAAGTTCAGCGCAGGATTGAACAGGCTCAGA
AGGACACTTAATGGCGTGGTCACAGGATATCAGGGACAAAGTCCGTAACGGGTACATCTT
TGACCAGCTTCCGCTGGATATCGTCGCCATGAAGTACGCCGTGCCGCACGATACCGCGCG
GCGCTGGAAAACGCAGGCGATGAAGAACGGCGACGACTGGGACAAGCTGCGGGCCGCTCA
CGCGCTCGCCGGTGACGGGCTGGAAAGTGTCGCCCGCACCGTACTTATCAGTCTGGTGGT
GAAGTGTCAGACGACGCTTGAACGGCTGAACCAGAACCCGGACATCCCGCCGCAGGAGTC
CGTCGAACTGCTGGCGAGTCTGTCTGACAGTCTCAGTAAGGCGGTGTCCAGCAGTAAAAA
ATCCTGCCGGAAACCGACCGGCTGGCCACGGCACTGGAAGTGGTGCAGCGGCTCGGCGCG
TTCATCAAGGAGCGTCACCCGGCACAGTATGCCCCGTTTCTTGAGGTGCTCGAAGGCTTC
GCTAAAGAGCTTGAGGATAATTTCAGTTAACCACAGCGGCCCGGTTTTCCGGGCCGTCTG
ATATTCGGGATTTGTAATGCAAAAACAGATTATTGGTAACGCAACGTTGTATTGCGGTGA
TGTTCTTGATGTGCTGCCGGCGTTATCCGAACGTTTTGATGCCGTCATTACCGACCCGCC
TTACAGCAGTGGTGGCACACATAAATCAGACCGCAGCATGGCCCCTTCGGACAAGTATGT
CGGTCACACCCAGTATGCCGAGTTCAGCGGGGATAACCGCGACCAGCGCAGCTGGGCATA
CTGGAGCACCCTGTGGATGTCCGGGGCTGCCCGCCTTGTGCGCCCCGGTGGTTATGTCAT
GGTGTTCAGTGACTGGCGACAGCTTCCCACCATGACCGACGTTTTTCAGGCCGGTGGTGT
GCTGTGGCGTGGTCTTGTTGTCTGGGATAAAACGCAGGCTTCCCGTGCGCCACACACCGG
CTATTTCCGGCATCAGGCCGAGTATGTGGTCTGGGGCAGCAACGGAAAACTCGACAAATG
CCCGCACGGTGGCCCGTTCCCGGGTGTGATTACGCAGCGCGTTGTCCCGTCCGAAAAACT
GCATATGACGGCAAAGCCAGTTCAGTTGATGGCCGAGCTGGTTAAACCGCTGGCACCGGA
TGCGCACGTTCTCGATCCGTTTATGGGAAGCGGCACCACCGCCATCCCTGTACTGGCCCG
TGGCGGACGGTTTACCGGCATTGAAATGACTAACCAGTATTTTGATATCGCCTGCGCACG
TCTCGAAAAAGCGCAGGCAGAAGCAGCGCAGGTGTGACGTGGCAAAACGTAAACTTTCCA
TTAAAGAGTTTCAGAGAAGCTTACAGGAGTACATCGCCAACCTCCGCCAGACCATTGAGG
CTGAATGTCTGGGGTTCGATGTAAACCCGCAGGCCACACAGGCCCGCCGGGCGGCAGTCT
GTGACCCGGTGACGGGCTACGATTATTTTGTCGAAAACTATTTCCCGCACTACGTCCGCA
ACCCGGCAAAAAGCGAGCTGCATAAATACCTGTTCAGCCGTCTGCCACAGGTTGTGGCAA
GCCCGGACCCGGAGAACGACGCCATCGCCGCGCCCCGTGGTGAAGCAAAATCCACGCTGG
TGACTCAGCTGTTTACCCTGTGGAACATTATCCGGGCCATTAAACATTATCCGGTCATCA
TTATGGACAGTATCGACCAGGCTTATCCGATGCTGGAAGCCATCAAGGCTGAACTGGAAT
TTAACCCCCGTTTAAAAAACGATTTCCCGGAAGTGTGCGGACAGGGGCGCGTCTGGCGTA
TGGGGACCATCGTCACGGCCAACAATATCAAGGTGACCGTTGCTGGTAGTGGTAAAAAAC
TGCGTGGGCTGCGCCACGGTCCGTACCGTCCTGACCTGGTTATCCTCGACGACATCGAGA
ACGACGAGATGGTGCGTAGCCCGGAGCAGCGCGACAAGCTGCATGACTGGCTTACCAAAA
CCGTGATGCCGCTGGGCGAGGCTGGCGGTAAAACCGATATTATTTATATCGGAACCATCC
TGCATTACGACTCCGTGCTGTCGCGCACACTCAATAACCCGATGTGGAAAACAGCCCGCT
TTAAGGCTGTTATTCAGTGGCCTGCCAACATGAAACTGTGGGACGAGTGGGAAGAACTCA
TCCGCAACAAACAGCCGGAAGCAGCGGAGGCACTTTACCGACAGAACGAAGCCGACATGC
TCGCCGGGTCGGTGGTGTCATGGGCGGCGCGTCCCTGCTGGCGCTGATGAAAATCCGTGT
CCGTGACGGTCATGACACCTTTGATTCTGAATACCAGAACGACCCGGTCAGCGGTGAAGA
TGCGCTGTTTGCGGGCTGCATTAAGTTCTGGGTTAACCGTCTTGATGAATGGGTGTTTTA
TGGTGCTGTTGACCCCAGTCTCGGGAAGAAGAATAAAAACCGCGACCCGTCGGCCATTCT
CGTGGGGGGCTTTAACCGTTTTACCGGCATTCTGGATGTGGTTGAAGCCGATATCCGCCG
ACGCCTGCCAAATAAACTTATCGAAGACGTGATTAAGTATCAGCGGGAATACCACTGTCT
GTGCTGGTCGTTTGAGTCCGTCCAGTTTCAGGAGTTTCTGCGCACCGTGCTGGTTGAGCG
TTCGGCGGCGCTGGGCGTTCCGGTTCCGGCGCTGCCGGTCATCCCGCTGGAGGATAAAGC
GCTGCGTATCGAATCCCTTCAGCCGCATATGGCCAACGGCCTGATCCGCATCAGTCCGGC
ACATCAGACGCTGATTGACCAGCTGCGCCACTACCCCAAAGCCGACCACGATGATGGCCC
GGACTGTCTGCACATGCTGTGGACGCTGGCGGTATCGCGTAGCGCAAAATTTCAGATACA
CACCCCACGCAGCACCGGGCGTGACCGTGGCGGGCGTTTTGGTTCAGGAGGATGGTAATT
AATGGCACAGCTTGTTGATATTTACGGACGCCCGCTGAAATGTGAGGCACTCAAAACCAC
GCAGTCGGTCAGAGTGGCGGAACGGCTGCGCATTTATCCAGACCACCCGTCGCGTGGTCT
GAACATCAGAAAACTGCCGCGCATTCTGGAAGCTGCCGAACGCGGCTATCTTCCGGCGCA
GGCGATGCTGTTTGCGGACATGGAAGAACGTGATGGCCATCTGTTCGCCGAGATGGAAAA
GCGCAAAAAAGCCTTGCTGACACTGGACTGGTCGGTGGAGCCGCCCCGCAATGCCTCGAA
GGCAGAAAAGGAGCTGACTGCCGCCGTGGATGAGTGGCTGCACGGCATCCCGGACATGGA
GGACATCATCCTCAACGGGATGACCAGTGTCGGTTATGGCTTCAGTTGTCAGGAAATCAG
CTGGGCGTTCGTGGATAAAACGTGGTTACCGGATGCGGTGACGCTGCGCCCGCATAACTG
GTTTATTACCCTGCCGGAACACAATGACGAACTCCGGCTGGATGACGGCAACCGTGGGGA
AGACGGTAAGGACGGTTCCGCATTGTGGCCATTCGGCTGGCTGGTTCACCGTTACAACGC
CCGGTCGGGGTTCCTGGGGTCATCCGGCCTGTTCCGCGTACTGGTCTGGCCGTATCTGTT
TAAAAACTTTGCGCTGCGTGATATGGCGGAATTTCTGGAGATTTACGGCCTTCCGGCGCG
CATTGCCTACTATGCACAGGGCACCAGTGACGAAGACCGGGATAACATTCTTGAGGCGCT
GGTCAATCTGGGGCATGAAGCGGTGGCAGCCCTGCCGCAGGGTAACGAGATTGAGTTCAA
GGAAGCCGCATCCGGCGGACCGGAGGCGTTCATGTCGATGGTGGAATGGGCGGAGCGTAC
CACCTCAAAAGTGATTCTGGGCAGTACGCTGACCAGCCAGGCCGACGGTAAAACCTCCAC
CAACGCACTGGGTAATGTCCATAACGAGGTCCGGCACGACATTCTGACCGCTGATGCACG
CCAGCTGTCCGGCATGTTCAGCAGTCTGATACAGATGATGGCCAGTCTCAACGGCTGGCA
GGATATCCCGTCACGCCGTCTTCCGCGCCTGGTGTTTGATGTGCAGCAGGAAGCTGACAT
TAAGGGCGTGGCGGAAGCCGTCAGCGTGTTGCTCAACAATGTGGGGATGAAGGATATCCC
GGCGTCGTGGGTGCGCAAAAAAACCGGCATCCCCACCCCGAAAGACGGCGAAGAGGTGCT
GGTGCCGGTGGCACAGTCTCTCCCTGTGCAGGCCGGACTCAGCCAGCTGCGTGAGCGGCT
GAATGTTGCCGCGCTCAGTCAGCAGGATAACGGGGAGGACGACCCGGCACAGAACGCCAT
CGACCGGGCAGAACTTCCGGCAGAGGTCATCGCGCAGGGGATGAACGAACTGGTGGCCCC
ACTGGTGCAGGCCATACAGGAAGGCCGGGATGCAGACGAGGCCATGAACGTACTGGCGGA
AGCCTGGCCGGAGCTGCCGGATGACACACTGCGGCAGTTGCTGACGCAGGCATTCTTTGT
GGCGGATATCTGGGGGCGACTGAATGCCGACAACTGACGATGTTGACCTGGGTTATGCGT
ACACCCTGAAGCCGGAAGAAGCGATTAAGTATTTCGAAAGCAAGGGATACGTCATCGGCT
TCCGTTGGCACGATGTGAAGGACATCGCACACGCCCGGGCGTTCACGGTGGCGGGCGTGC
TGAAACTGGATGTTCTGAAGGATATCCGTGATGGCCTGACGGCGGCACTGGCTGACGGCG
GGACGTTCCGGGAGTTTGCTGCACAACTGGAACCACTGCTGGAATCAAAAGGCTGGCTGG
GTAAAAAACTGATTGTGGACGAGGATACCGGCGAACTGCACGGCAGACAGCTGACGCCGC
GCCGGTTGCGCACGATATTTGATACCAATATTCAGTCGTCCTACAACGCCGGGCGTTATC
AGCAACAGATGGCGAACGTGGCTGACCGGCCTTATTTTGAGCGGGTGGCGGTGATGGACC
TTCACACCCGCCCGAAACACGCCGCCCTGAACGGCTTTACCGCCCGGGCGGATGACCCGG
TCTGGGAGTATTTCTACGCGCCTGACGGATACGGATGCCGCTGCCGTATCCGGGCGCGTT
CGGCGTCAGATGTGGAGAAATATGGCCTGACGGTGCAGAGCAGCGAGGGGCGACTGGTTG
AGGTTGAACAGGAATATGGCCAGCCGGGCCAGACCATCAGAACAATGGGGCTGAAGATGC
CGGACGGTTCCGTGTATACCGCCGACCCGGGCTTCGGATTTAATCCCGGTCGGGTGGCAT
GGCAGCCGGAACTGGAAAAATACGATTACCGCAGCGCCCGCCAGTATGTCACCGGCACCC
TGACCGGGCCGGATTTTGCACGGGGGCTGGCGAACGTCAGCGAACTGGATGCGCGCCAGC
GATATCCGCTGGCCATCCGTTCACCGGAACAGGTCGCCGCCACGGGCGCTGCACGGCAGA
CGGTAAACCTTACGGCTGACGTCATGAAGCGCCTCAGTGCAGCAAACACGCCCCCGACTG
CCGCCGACTATGCGCTGATGCAGCAGACCATCGAACGGGCGGAGCATGTCACGCAGGACG
GTAACGCGTGGCGGTATGCGTTACAGTCAGGCGACCGCTGGTCGGTGGTGACGGTTGAGG
ATGACGTGCTGACAGACTGGGTTATGCAGGACACCCCGGAGGCATCATGAGCAGCGGTGA
ACTGGATATTAAGATTGATTTAAGCGCGTATAACACCACGCTGGGTAAACTGATTCGTTC
CGTGAAGGACCGGCGCGACCTGATGACGGCGCTTGCGGGTTCCATGCTGGATGCGGTTGA
GACTAACCTGGAACAACAGGGTCGCCCGAAATGGATGGGCTGGAGTCCGGCTTATGCGAA
GCGGCGCGGCCCCGGGCAAATCCTTCAGAAGTCCGGGCGACTGGCCGCCAGTATCCGCTC
TGCGGTTAACAATAACGAGGCCACGGTCGGGACAAACGTCCGTTATGCCCGTATCCACAA
CGAAGGCGGCGAAATCCGCCATCAGGCACGGACGCAGAACCTGTATTTTAAACAGTACAA
AAACGGCAGCGTCAGCACCCGCTTTGTGAAAAAGCGCAACAGTAATTTTGTGCAGAGCGC
AACGGTCGGAGCGTATACGGTCAACATGCCCGCGCGCCCCTTCCTTCAGCTTGTGCAGGA
CGACATCGACGAGCTGGAGAACACCGCAAACCGCTATTTTGCGCGTGTGATTGACTGAAT
GGCGACAAACGCGCTGTAATCGGCTGTGACAGCATAAACGCTTCATGGATGAGGCATAAC
AGCACCGCATCCCATAAATGCCGTCAGAATCGTTTTTAAAAGGGTTTTAAAAACGGTTTT
ATTTCCCCTTTTATCCTTTCCCGTTATGGCAGGGTGCTGAACACCCTCCACAGTACCCCG
TGTTCCCCTTCCGTCATCATGCCGCGTATGAAGATGAACATTGCGGCGTTAAGCCTCGAA
ATTACTAAAGCAACCCACAGCGAAATCCAGCTGTTTCCGGCAGGCGAGTTCAGTGCAGTG
GATGGTCGCCCACATACCGATGAAGTCGAAAGCGGTAAATGGGTGCTGACTGCCGAACTG
GCCGCGCAGCTTGTCGCACAGGTGGCAGCCCGTACCACGCCTTTTGTCATTGATTACGAA
CATCAGACGCTGCGCGCCGTAAACAACGGCAAGCCCGCCCCGGCGGCGGGCTGGTTCAGC
CAGGTGGAATGGCGTGAAGGCGCGGGCCTGTATGCCATCGGTGTGGAGTGGACGGAGAAC
GCGGCGGCCATGATTGCCGCCGGTGAGTACAAATTTATTTCCCCGGTATTTGGATACAAC
CGGCGCGGCGAAGTCATCGAACTGTTACACGCCGCACTGACCAATACCCCGGCGCTGGAC
GGTATGGACGCGGTCATGCTGGCTGCGGCCAGCCGTCTGGCGAGTCTGTCAACTGAAACG
GAGACCACAACAGTGGATGAAGAACTGTTAAACGATTTGCTGTCCAGTCTGCGCTGGATG
CTTAACCTCCCGGTTACCTCAACGGCGGAAGATATCAAAAACGAGCTGCAAAAGGTCGTT
GACATGATTTCGAACGGTCAGGGAACGGCGGCGGCATCCGTCAGCCTGCTGGCCCTGCTG
AATCAGAAAGACGAGCAAATCGCCAGCCTGTCAGCCAGTGCCTATGACCCGTCAAAACAC
ATTTCCCTTGCTGCCTTCGAAGAACTCCAGGGGCGTTATGCCGCACTGGCGCAACAGTCC
GGTGAGGCCGAAGCCGGGGCACTGATTCAGGCGGCGCTGTCTGACGGGCGACTGCTTCCG
GCACAGGAAGGCTGGGCGAAAGATTACGCCAGCCGCGATATCAACGGCTTTAAGTCCTGG
CTGGATAACGCACCGAAACTTGTTGCGCTCAGTCAGACCCAGACCGGCGGCAAACCACCC
AAAACGCCGTCGCCTGCCCCGGCGCAGATTAAAACCGGCGATGACGTCGATGTCGATATC
GCCATTTGTTCAATGATGGGCGTCGATCCAGAGGATGTCGCCCGTTACGCAGGAGATGAG
TAAATGGATCGCAATACCCCCTATCGTGACGGCGAACTGAACCCGGTGCCGGTTGCCGCT
GCGACCGAAATTTTTGGTGGTCATATGGTGGCCGTTAACGCATCCGGTTATGCCGTTCCG
GCCAGTGCCACGGCCTCACAGATTACGCTGGGCGTGTCTGATGGCTGGGTGGATAACAGC
AAGGGCAGCGATGGCGACGCCACCGTTCTGGTGCGTTGCGGCAAAGATTTTCTGATGGCG
AACAGCACCTCAGACCCTGTCACACAATCGCAGGTCGGCAAGCTGTGCTACGTGGAAGAC
AGCGTGACCGTGGCAAAAACCGACAACAGCAGCGCCCGTCCTGTCGCAGGGAAAGTGATC
GGCATCTGTGGCGATGGCGTCTGGGTTCATTTCAGTTAAGGAGCAAAACGTGTTAGTCAA
CGTTAAAAACGTCAAACAGATTTTTATCAATCTGAAGGTCACCTTCCAGAAAGCCTTTGA
CCAGTCACCAACTGACTGGCAGAAGGTGGCAATGGAAGTGCCATCAAACGGCAAGGAAAA
CGACTACAGCTGGTTAAGTCGTTTCCCGAAAATGCGCGAGTGGATTGGTGACAAGGTCGT
TAAATCACTGGCGGCATTTAACTACACCATCCGTAACAAGGACTGGGAAGCCACGGTTGA
AGTCGATCGTAACGACATCGAGGACGACCAGATTATGGGCTATGCCCTTCAGGCAAAAGG
AGCCGGACAGTCGGCGGCAGAACTCCCGGCAGATATTGTGGCGTCCCTTATCAGTAACGG
TTTTACCAATCCCTGTTACGACGGCCAGCCGTTCTTTGATACCGACCACCTGGTCGCCGG
TAAATCGGTGTCCAACAAAGGCACCAAAAAACTCAAAGTTGGCTCGCTTGCCGAAGCGAA
AGCCTCCTACGGTGCCGCCAGAACTGCCATGCGTAGTCTGAAAGATGACGAAGGCGCATC
CCTCAAAATTCGCCCGAATCTGCTGGTTGTGCCACCGGCGCTGGAGGATGACGCGAACTA
CCTGATGACCGCCGAGAAGTTCCCGGACGGTACGCCGAACCCGTACCGCAATACCGCCGA
AGTGCTGGTGATGCCGGAGCTGGCGTCGGATTCTGCGTGGTTCCTGTTTGACACCACCAA
ACCGGTGAAACCGCTGATTTATCAGCTGCGTAAAAAGCCGGTTTTTGTGGAGCAGACGGA
CTATAACAGCGACAACGTGTTCAAACGTAAGAAGTTCCTGTTTGGTGCTGAAGCGCGCTG
TAACGGCGGTTACGGCTTCTGGCAGATGGCATTTGGTTCTGATGGTACGACGGAGTAATG
CATGGAAAAGGTGATTGAAATTACCGCCCGCCGTGAGGGTTTTCGCCGCTGCGGTGTGGC
ACACAGTGCAACCACGAAGGCATGGCCGGTGGATGCGTTCACCCCGGAACAGCTGGCGGT
GCTGAAGGCTGACCCCATGCTGATTGTGGTGGAGCGCGATAAAGCGTCCGGTCAGAACGA
CGCGGCCCGGGGTGATGAACTGGCCGCACAGCTGGATGCCGAGCGTCAGAAAGTCAGCGA
ACTGACGGCGCAGCTGGAAGAAGAACGCCGGAAGGTCCAGGACCTGACTGCGGAGCTTAA
AGCGGCGAAGAAAACGGACAAGAAGGAGAAGTAACCCATGTCTTACGCCACACCGGAACA
GTTCATCAGGGCGTTCAGTGAACGCGAGGCGTGCACACTGACGGATGAAGAGATGACCGG
GCTTATCAACGAGGAAAAGCTGGCCTCCGCGCTTGCGCGTGCCAGTGCCCAGATTGATGG
CTATCTGGTGGGGCGTTACCGGACCCCGTGGCCTGACAGCCCGGGGATTCTGGTGGGTTA
CTGCTGCGATATCGCCCGTTATCACCTGGCGACCGATTACCGTATCTGCTCAGAAGAAAT
TCAGATGCGCTACCGGGACGCCATCCGCTTTCTGGAGAAAGTCGCGGCAGGACAAATCAA
CCTCGGGCGGGATACGTCCGGCAGCGTGATCCAGTCATCGTCACAGGTGCGTATCCGCTC
CGGCTCCCGTCAGTTCGGGCGTGAGTCCACGCGGGGAGGTGCATTCTGATTACTGAAATT
GAACGGGCGCTGGTTGAACGTCTGCGTTGTGGTCTGGGGAAAATGGTGCGGGAAGTCCGC
ACCTATGCCGGTGAACTGGATGAAGACCCGGGCCGGATTGTTCGCAGCCTTCCGGCAGCC
TGGGTGACGTTCGGCGGCATCGCGAAAACCGAACGCTATTCCACGTCACGCCAGAAATAC
ATTGCCACCGGACGCTTTGTGGTTGTGGTGGGTGATTACAACACCCGCAGCGAACAGAGC
GCCAGACAGGGAGGCACCGTCCGGGATGAAGTCGGGACAAACCAGCTGGTTGAATCCGTC
CGTCGCCTGCTGACCGGTCAGGATTTGGGGCTGGAGATTGATTATTTCGAACCCGGGCGC
GTCAGGACGCTGTTTAACACCGGCGTGGCAGAGCGGGCAATGTCCGTGTTTGCCTGTGAG
TTTGATACCCGCTGGGTGGAGCACGCGCTGGAGAACGGCAAATGGCCGGAGCGCGGTGCA
GAAGCGGATATGGTTTTCAACCGTTACCACGGCCGTCTGTCAGACCCCGACCCGGATTTA
CTGCGAATTGGTACGCAATACGGCGCAGATATCTGTGGTCTGGATGAATTAAGAGAGCAA
CAGCATGAACAAAATGAAGGTTAAGGCGGCTCCCGGGATGAAGTTCCCGATGGAGGATAA
CGCCCGGAAATACATCACCACGGAAGCGGTGATCGTTGAAAACACCGCTTATTACCGGCG
CGCTGTTCAGGATGGTGACCTGATTCTGGTGGCTGAAGAGCCTGAAACGGCAGAACAGGA
CACCGGACCAGAAAAAGCGAAGGTGAAGAAAGAGAAACAGGTGGGCTCCGATGAGTGAAA
TTCAGTTTGACACCATTTCGGGCAGTATCCGTAAGCCCGGTGTGCATTTTGAGTTTAATA
CCCGGCTGGCCGTTAACACGTTGCCGGGTAACGAACAGCGTGTTCTGGTGATTGGCCCGA
TGCTGTCAGGCGGCACCGCCACGCCCCTGAATGCGGTTTCCGTGTATTCCGAAGACGAAG
CGGATTTGTATTTCGGGGCCGGTTCACTGGCCGCAGCAATGGCGCGCGCGGCCATTAACG
CCAACAGCTATCTGCAACTGGATGTTATCGGTATTGCAGACGGTGGTGCAGGAAAAGCGG
CAACAGGCGCAGTTAAAGTCACCGGCACTGCAACCAGCAGCGGTACGCTGTCGGTATGGA
TTGCTGGCGAGCAGATCGCCATTAATGTGGACGTCGGGGATGAACCGTCGAAAATCATTC
CGGCACTGGTGACGGCAATGACGCAGACGCCATCGCTTCTGGTCACGGGGGAATACAAAT
CTGACACCTCTCAACTGACAGTGACCGCCCGGACCAAAGGTACCTGGGGGAATGATATCA
CCCTGTCGGTATCCACCACTGCAACCGGCCTTGTAGTGGCTACCACGCCGATGGCGAGCG
GCGAAATGGACCCGGATATTCAGCCCGCACTGGATGCGGTCTTTGCTGCCGGTCACAACA
TTCTGATTTGTCCGTTCAGTACCACACCAGCCCTTGCCGCCCTGAAGCAGCACCTGGAGA
AAACCGGGAACGCGATGGAACAGCGTGGCGCGATTGGTTGTGCGGGCTGGACAGGTAGTC
TGGGAAACGGGATCACCCTTGCAGCCGGTGTGAACAGCGGGCGCGTGTCTGTCCCCTGGT
ATCGTGGTTCTGTGATGCTTCCTGCCGTGCTGGCCGCCATCTACGGCGCAGTAATGGCGA
GCGAAGAAGACCCGGCACGCCCGCTGAACTCGCTGGCGCTGTCCGGGCTGGATGTGGTCG
CCATGTCACAGCGCGAAAGCCGTAACGAGCAGGAAAGCGCCCTGCATAACGGCCTGACAC
CGGTTGAGGTTGGACCGGGTAATACGGTGCAGATTGTGCGTGCGGTCAGTACCTACACAG
TGAACGCTCAGGGTGTGGCTGATGTCTCGTTACTGGATATCACGTCCATCAGAACGCTGG
ACTACACCCGCAAGGCGTGCCGCGAACGTATCAGTCTTCGCTTCCCGCGTGAAAAACTCA
GCACCCGAACCATCGCAAAAGTGGAAAGCGAACTGTATGACGTGCTGCTCAAGCTGGAGG
AGTCTGAAATTCTGGAGAATGTGGAAGCGAATAAGGCAAAACTGCGCGTTCAGCGAAACG
GGAAAGATGCAAATCGCCTGGACTGCGCGATCCCTGCCGACGTGGTTAACGGCCTGCATG
TGTTTGCCGGTCGCATCGACATGATTTTGTAAGGAGCCTGATAAATGTCCCTGAAAGAAT
ATATCGGCTCGATTGTGTTGGAAATTGACAGCCAGGAAATCGAGATCACCGACCTTGATG
TTCAGATCAACACCGGGCGAAAGCTGGTCAAGACCATGAACAAAAGCGGCAGGGCTAAAG
GCTTTGCCCGTGGCATTGCCACCTACGAACTGTCCGTTTCGGCGGTTATTCCTGATACCA
ACGAGCCGGATTGGGAAAATCTGGAAGGTGTGAAAATCTCGCTGTACCCGCTCAGTAACA
GCGGCAAACGCACCTCTTATCTGGACTGCTTCACAACCGAAGTGGGTGAGAAATACACCG
TCGATAATGAAGCGAAAATTGATATCAAAATGGCTGCACTCAGGAAGGTGGAAGGATGAC
GATTATCGCTACACAGACCGGCGAACTGTCCGATGGTCTGGTTTTTAACGGCACCATTCA
TAAAAACTTTGAGCTGCGTCTGCCGGTCATGCGTGATAACGGGCAGGCACTGGAAGAAAC
TGAAGAACGCTTTCAGACAGTGGACGGCTTCGCGGCGGATTATTACTACCGCTGTGCGGT
GATGGCGGCAACGCTGGTCCGTCTGGGGGATATTCCGCAGGAAGAACTGACGGCGGAGCT
GTTGCACGACAACATGACGCCGGAAGATTTTAATATTCTGCTGGCATCACGCAACGTCCT
GAAGGTAAAGCGGAACGGCGGGAATCCCGGCTCGCCGGACTCCGGCTCGCAGTCCTTATC
CTCGGGCGCTACGGAATAACCGAAGAACAAATCATGACCATGAGCCGTCCCGAGCTGGAC
GGCTGGCTTGCCGCCGTTGACAGGCTGAACGGCGGCGGCTCAGGAAGAAAGGACACCTCA
CAGACCACCCGCCAGTCATTTAAATCCCTCAGAAAGAAACGCAGAAAAGGTAAACAGAAA
AATGGCCGGTAATTTCAAAGTTGGCATGACCCTGACTGCGAAGGACGAAGCCTCGCAGGT
TCTGGAAAAGGGACAAAAACAGGTTATCAAAGCCACCGAAGGTGTAACAAAGGCAACCCG
GAAGGCAGGCGCAGAGCAGACGCGTACCGGGCAGGAAAGCGTTAACAGCACGAAAAAGGC
GGCAAAAGAGATACAGCGTGCCGCCCGTGCCCGGGAAACGCTCGGTATTCGTGCAGAACG
TGAAATCCGGCGTGAAATTTATCAGACGGTTGCCAGCTATAACCGTCTGGCCCGCGCCGG
TTTTGAATCTGCGCAGGAGCAGGAGCGCGCCATGCAGGCCACCCGGGAAAAAGCCCGGGC
ACTCAAGCGTGAACTGGATGGCGTTACTCAGGCTCAGATGAAGATGGCGAAAACGCCTGT
TATCCCTGAACCGGGGCGTTTTGCGCGTGCGGCTGCATTTGGCGGGAATGCCATGACAAT
AGGCGGCGGAATTATGGCAGGAGCCGCCATTATGACGCAACCAGTCAGAAATCAAATGAG
TTATGAACGTCAGCTCAGCATGATGGCGAACACGGCGTTCAGTGATGGTGGTCTGGAAGG
CAGGCAGTTTGGGCGTGAAAAGCTGAAAAACAGTATCCGCGCGGCGGTAACGTATGGTGG
CGGAACGAAAGAGGATGCAGCTGAAGCAATGAATGAGATGTTGGCCAGCGGCGCTTTTTC
CTGGGATACCGCGAATAATCTCTTACCGCAGATTATGAAATTTGCTACTGCATCCGGCGC
ATCTCCACGCGATCTGGTCACTATGGCGGCCAAAGCTAAACAAACATTTGGACTGACAGA
TGACGACCTCCCGGCCATGTTTAATATGGCTGTCGCAGCAGGTAAAGCGGGTAATTTTGA
GCTACGGGATATGGCGGAATATCTTGGACCTCAGATGGCATTAGCTGGTAACGCCGGAAT
GAAAGGACTGGATGGACTCCAGAAATTACTGGCATTTAATGAGGTCGCAGGGATTGCCGC
AGGCAGCAGCAGTGAAGCAGGTAATAACGTTGTAAACCTGCTGGCCAAACTTTTCAGTAG
TGAATCAGCAACAAGGGCGAAAAGCATCACGATTGATGGCAAAGGTATTGATCTACCTGG
TACGTTGACCCGAGCTATGGAAAACGGCATTGATCCGATAGAAGCATTTTCACGCCTCAC
TGATAAAGTCACCGCGAACAACAAACAATATCAGGAGCTTCAGAAGCGTCTGGCAGCAAC
AAAAGACAAAGGCCAGCAGGACAAAATCCTAGAGTCTATGGCGAAAATTCTTGAGGGGTT
CGGTGTTGGTGAGCTTGTTGGTGATATGCAGGCACTGAAGGCAATCCTGGCTTACAGGAA
TAACCCGGAATACCGAAAGCAGGTCGAAACTGAAATCAGTCAGCAACGCACCCTGCCGGA
AGGTCAGCGCGCCGGAGATCTGGATTTTAAATTCATGTCAGGTACGAATGATTTTAAAAC
CGAACAGGCTAAAAACACGCTTGAATTTTCACAAATGGACAGCGTGAAAAAGCTGGCTGA
TGCGTCCGGTGCTGTGGCCGATGCCATAAGCTGGGCGGGTGAAAAGTTCCCGGGACTGAC
CACGGCAGTGGTGGGTGCCACGACCGCCATTGAAGCGATGACCGCAGCGGCCCTGACATG
GGCCGGGATCAAAATCCTGACCGGGGGTAAACCCGGTGGCAAGGCTGGCGAGGTTGTCGG
TGATGTCATTGAAAACACGGTCAAAAAAGGCAAAGGATTTAAATTCCCCGGCATCGCCGG
TAGCCTGCTTTCTTTCGGTGGCACCGTTACGGCACTGGCCACCGCAACCAGCCCGGAGGA
AGACGCCGCCGTCGAAGGAAGCGAAGAACGCTGGAAACGCATCCGCGCCCGATACACCCA
GGAAGAAATCGACGCCGCCCGCAAAAAATACCAGCCATGGTGGCAGTTTGGGGAAGGCTA
TTCCACCGAAAACGAAGAATGGTTGAGGCGCTGGGAGGAAGACAGGAAAAAAGCCGCAGC
TGATGCCCTGCCATCACCGGCGCAGGTTAACAAAGCCGCAGGAAACACAAAGCCTGAACC
GGCATCAACTCAACCCGGACGCATCACCCAGCCGGAATACCTCACGCACTGGGGACCACC
TGCCAGTCCCATTAATTTCACCACACAACTGGTGCTCGATGGTCAGGTTGTGGCGGAGGC
AGTGAACAAATACAACCTTCAGGACGGTAACAGAGGTACGGGAGGAACTTACTGATGGGC
TGGGCTGAAAACCTGCAAAACGCTTCCTTTCGTGGCGTGCAGTTTGAGGTGCTGAATACT
GACGAACAAATCAGCCGCGACCATGCGGTCTATGAATACCCGTTTGTTGACGGGGCGGAT
TTGCACGACCTCGGACGCAAGGCGCGACCGTTCCGCATGACGGCGTTCCTGTGGGGCGAT
GACTATGAATATAAACTCGGGAAACTGACCGCCGCCCTGGATGAAGGCGGCGATGGTGAA
CTGATTCATCCGGTTTATGGCTCTGTGCCGTCGGTGATTGTGACCGGCTACAGCATCCGC
CATGACGCAGAAAGCCCGGACAGCTGCACCATTGACATGAGTTTTCTGGAAAACCGCACC
GGTAGCGCGTTGTTCAGCACCCCGTTACCGGAGCTGTTCGCGCAACAGTTGTTTGATGAA
CTGGACACTTTACAGGCGCGGTTAAGTGATTTTTTTGATGCCGTTACTGCACCTTTAAAT
ACCGTTAACAGCATGATTAAAAAAGCCCAGACAGTGCGTGCCACACTGGTGAATACCCTG
CTGTCGTTCAAAAGTGATTTTGTCTCCACTGTCGATAATATCGTGTCACTGGCAGGCGAA
CCCGGAAAATTTATCAATGAACTGGCAGAGGTGCTGGAAATCCACACATCAGATGTCGGG
CAACCGGTGCAGGTTCTGCAACGTGTTGATTCTGCCACCCGGACCGGGTTGGCAGGAGAG
ACGACCGTCGCCAGTTCTGCGACAGTGATGAACTGCTGGAATAAGGTCATCACTGATATG
GATGAATTTGTTGCGTTGCCTGTTACCCTGGTCAGTGGCGATAAAGTAGCGGAGGTGGCA
CTTCCTGTGGATGCCTCGCCAGACGATGTGCAGGATGTGAAAGCAGTTTACGCAACACAG
GCCGCATCTGAACTGGCCAGTGTTGCAATGGCGATACTGGTTGATGATGCGCAGTCAGAA
CAGCTTATACCGGCGGATATCGGGCGACTGGTCGGGGATGTGCGCACCCGCTTACAGGCT
GTCATCACGCTGTTCCGTGAACGCTATGAAGGCGAACGCGAACGGATAACCGAAACCGCA
TCACCACTGGGGCTGATGTACCCAGAAATCATTCAGAGCATGAAGAACGTGGCGGCATCC
GTGCAGGATGTCGGCCTGCTGGTTCTGTCACGCCGCCCACCGCTGACGCAGAAACAGGTG
CAGGCGGACAGCTGTCTGCTGTTGCTGGCGTGTCAGTGGTACGGTGATTACAGCCGTGCG
GCAGAGCTGCAACGTCTGAACCCGCAGCTGCGTGACCCGAACAACATAACCGCCGGGATG
GTGATTAATGCCTACGCAAAATAACGACGACAAAATCAGCCTGGTCATTGCCGGAAGGTC
GCATTCTGACTGGAGCAGTTATCGTATTGACAGCGATTTCCTGAAAGCCGCCGACGGCTG
GCAGCTTCAGCTGGGACTGCCTGAAAAGGTGTTCCCGGCGGATATCGTCCGGGGCGCGCC
GGTCCGGTTGCAGGTGGGAGACGAGACGGTGCTCAGTGGTCGCGTGGACAGCGTGCGCCG
CAGTGTATCCCGTCAGAGCTGCACGCTGGCCCTGTCCGGGCGTGATGATGCTGCCATTCT
GGTGGACTGTGCCGCGCCGGTGTTCAGCGCCAATCAGCTGACGCTGGACGAGGTCATCGA
CAGGATAGTCAGACCACTGGGGATACAGCGCATCCGTATACAGGCGTCCGGCGTGTCACG
TAATGACAAAGTTGTTATTGAGCCTGGGATGCGTGCGTGGGATGCACTGGCCAAAGCTGC
CGCCGGTCGCGGCTTATGGCCGTGGTTTGAGCCTGACGGGACGCTGGTTGTGGGTGGCCC
TGACTACACCACCACGCCGGTGGATACGCTGATTCTGAAGCTGAACGGCACCGGGAACAA
CGTGATGGAGCTGGACGATACCCGGTCCATTAACGGCTGTTTCTCCGAACTTACTGTGCT
GGCCCAGAGCCACGCCCGCCGCGCAGACAGCAAGAAACAGGTGGCCGTGGTGCCGCTGGA
TATCTGGAACGAGGACGGCAGCGTGCGCACATTGTCCGGGCAGGACAGCGGTAATACGGA
CAGTGGCCAGACAGGCATTCATAACATGAAAGCCGTTGCCACCGACCCCACCGTGGATTA
TTACCGCCCGCAGATAATCACCCAGGGCGACACCAGCAATCTGGAGCAGGTGAACTGGCG
CGCAAAAAAAATGATGAGTGATGCCCGCCTGTCGGGGCTGGATATCGTCGCGCTGGTTGC
AGGTCATCGCACGGCAGATGGTGTTCTGTGGCAGCCCGGCCAGCGGGTGCGGATTGTCAG
CGAACTCCACGGCATTGATGCCATCTTTTTCCTGATGGGGCGTGAGTTCAGCGGAGGCCG
GAACGGGCAGACAACCCGGCTCCGCTTTAAGGAGGACGGCGTGTGGATACCTGATGCCTT
CCCGCGCGAGAAGAAACGCCATCACCGCAGGGGCAAAAAGAAAAAAGAGGTCGCCATTGT
TAAGGTCTGGGAGAAATGATGTGGGACAAAGTTAATCAACGCGTACAGCAGGCACTGGCC
GCCGTTCGCCAGGCATTCAGGGTGGTGACCGGTACGGTGGACAGTTCGACCAAAGTACAG
CTGCTTCAGCTTAACGGGCTGGCTGGCGAACAGCTGGACGGTGCGGAGTATTTTCAGCAT
TACGGCCTCACCACATCCCCGCCGCCCGGCTCAATGGGTATTGCCGTTCCGCTGAACGGC
AATACCTCCCATACTGTCGTGGTGGCCACAGAGCACGGCGCATATCGTCTGACGGAACTG
AAACCCGGGGAAGTGGCCCTGTATACCGATGAAGGCGCGAAAATCGTACTGAAGCGCGGA
CGGGTTATTGAAACCGAATGTGACGTTTATCGCGTGAAATGCAAACGCTACGAGGTTGAG
GCAGAGGAGAACGCCACATTCACGACACCGTTACTGACAGCCAGTGACAGGCTGACGGTG
GAAGGCAAAATCACCGGCAACGGTGGCATGGCCATCAGTGGAGGCAAGGGATACACTGCC
ACCTTTGAAGGCAATATCAACCATGTGGGTGGAGTGATTACCTCCGTTGACGTCACCATT
AATGGCGTTAAAATCGGAACGCACAAACATCCAACCCCACACGGCATGTCTGACACGCCG
GTTAATTAAGTGCTGAACACCCTCACCTGATTCTGACCTGTCCATGCTGCCAGACTGGCG
GCATGGACCAGACGATTTCACCTGCAACCGGCGACTACGAACGCCGTCGGATTTATACCC
TTCATAACGCGGTTTATCTGCGACTGGCGACGCCGCTTGGCAGTTACTGGGCGGATGCGT
TGCTGGGGTCACGCCTGCACGAGCTGAAGCGGGAAAAAGACGTTTCCCGTGTTCATAAGC
TTGCGGCGCAGTATGCCAGCCAGGCACTTCAGCCCCTGCTCGATGACGGGCGGGCAAAAT
CCATTACCGTTGACACAAAACCGGGGCAGCGCGGCTGGTTGTTGCTGTTAATCACCGTCA
CGGATAACGCGGGCACACCGCAGACGTTTGAACACCCTGTGAGGATTATGTAATGCCGTT
TCCTGTTCCGGGCGTTGCTGAAAACACAGAACGCCAGCTACGTGATATCGCTAACGCCCT
GCCGGGCGAAACCATCGACACCGGCGCTGACAGCGATTACCGCATTCGTGCAAATGCCGT
ATCCGGCGTGGCGGACGGACTGTATATGCATCAGGGGTGGATACTCCGTCAGGTGTTTCC
TGATACGGCAGACCCTGAATATCTGGAGTTGCACTGCCGCACGCGCAATGTTTTTCGTAA
AAAAGCAACGGCCTCATCCGGTCCGGCAGTGATTACCGGCACACCCGGTAAGACGCTGCC
AGCCGGTGCGGAAATTCGTGGTGAAGGTGTCAGCGTGGCCACCGCAGCAGACTGCACCGT
CGGTGATGAAGGCAGCGCAGAGGTGACGGTAAAAAGCACTGCCACGGGTGCACAGACGAA
TGCATCCACGACGCAGACGGCAACGCTGGTCAGCCCACCTGAAGGCATCAACAGCACGGT
GACGATTAAATCCCTGACCGGCGGAACGGACAGGGAAAGCGACGCCGACCTGCTGGCGCG
TTATCTGGATATTCTGCGCAGGCCGCCCGCTGGCGGTAATAAATATGATTACAAACGCTG
GGCGCTGGAAGTGGATGGCGTTACGTCTGCGTATGTGGAGCCGTTGCGTCGTGGACTGGG
GACGGTTGATGTGGCCATTACGTCAGCCAATGACCTCCCTTCGCAGGAACTGATTAATGC
CGTGCTGGCACATATTGAGGAAGTCCGCCCGGTGACAGCGAAGGACACGATGGTGCTGGC
CCCGACGAAAAAAGCCGTTGATTTCGTTGTCCGGGTAAAAACCAGTGGTCTTACTGTTGA
ACAGATAAAACCACAGATAACTGAAGTTATCACGGATTTTATGAACCGGCTGGAGCCGGG
GCAGGAATTAATTATTTCACAACTGGAAACTCAGATTTCATTAATTTCTGGCATCAGTGA
CCGGCGAATTATTATGCCGTCAGATAATGTAAAAGCAGTTGTCAATGAATCCACATGGGA
GTGGCTGCGTCCGGGGAATATTGATATCCAGCCATTTCCCCGGGAGAGTTAATACATGAA
TACGGTTGATTTATTTCGTGCCATGTTACCACCGGTCAGCTATGACCCGAACGGGAAATA
TATTTCAGCAGAACTGAACGCAGAAGCAGCCATTATGGATGAAGTAAAAGCGTCAGCTGC
ACGAGTGCTTGCATCTGTCACACCATTTTACGCATCCATGACGCTGTCTGACTGGGAACG
AGTGTATGGAGTAATACCCCGCGACGGTGCCACACAGCAGGAACGCCGAGAAAATATTCT
TATAAAGATGGCTGCAACTGGTGGGTTATCTATCCCTTATTTTAAACAACTTGCAGCCAG
CCTCGGGTACACCATAACAATTACTGAACTTCATCCATTCAGAGCGGGGATAAACCGATG
TGGTGATCGTCTCTATATAACAGATGCCCGATGGATTTGGCAGGTTAATGTCACAGGAAG
CAGAACGCCAGCCTACAGATTCAGAACCGGAGTATCTGCTGCCGGGGAGCCGTTACTTTC
CTTTGGTGCCCCTGTACTGGAAGAAACATTTAAAGACCTTAAACCCGCTTTTACTTATTG
CCATTTCACATATAAGGAGGAGCAGTAATGCAAAATCTGATGCCCCCGATAAATACACCG
GATCAATTGTTTCATGATGGTGACCCCACTCAGGGGATAGAAGGAACCCTCGTGACTGCT
GGTTATTTAAACAATCAGCAGGGGGCAACCCGTGATTTACAGCAGGAACTCCTTAATGTT
CTTGGTGGTGCACATATTCAACCTGACCCCAAAAAAACGGATCAGCTACTTACCGCGCTT
CGCGCGTTGCTGTTAAGCCGCAAGAATCCGTTTGGCGATATCAAATTGGACGGCACGGTG
CAAAAGGCTCTCGAAAACCTTGGTTTGGGAGAAACGATAGATAAAGCCTCCGGAGCTATG
CAGAAATCGGCTAATGGATCTGATATTTCTGATGTATCAGCCTTCCGAAATGCGCTCCAG
TTAGGGACCGCTGCAACACGAGATGTTGGAGCAGATAATGCCTCGAAGTTACTGGATTTA
GACAGCTTCAGGTCAATGATGTCAGGTAATGGCTACATCTACATTCCATGCATTGCGACG
ACAGGAAACCCGGTGCAACTTATGTTGCAGTGGGGAACGGTGGCAACACAAAAGGGAGTT
GATGCTGGATATGCCTTACCATTTGCTTTTCCCTATGCAGGTTTGTTTGCGACCGGAAAC
CGTGGAACATCTGGCTACAATGCCGCGATGAATGTGCGTATTGCCAGCAGAACGCATATC
AGTATTCAGAACTGGTCGCCATCCGGAGAGGGCACCGAAGATTGTTGTTTTATCGCGTTG
GGGTATTAAGAATGAATAAATTTTATAAAGGCTCTTTCTATCCGGAAGCACTAAAAGATG
TATATATCAGCGCCGGTTCATGGCCTGAAAATGGCGCTGATGTTGATGATGAAACAATGG
CAATTTACACAGGCGTAGCGCCAGAAGGCAAAACGCTGGGGGCTGATAAAAATGGTAATC
CTGCGTGGATTGATATCCCGCCACTCTCCGCTGAACAACAGATTATTCAGGCTGAACAGA
AAAGAACGGTATTGCGTTCTATGGCTGATAAGGAAATAGTCTGGAGACAGGATGCTTTTG
ATGCGGAAATCGCGACGGCAGAAGAAACCGCCGCGTTATCTGAATGGAAAAAATACCGGG
TCTTGCTGATGCGCGTTGATACATCAAATCCCGTCTGGCCTACGCCTCCGGGGGAGCAGG
CCAATTGATATCCGGCGCGGTGCTGGTATCTGTTGCCGTCACCGCGTCAATGTAATCCAG
CACAGCGTTAAGCCGGGTTGTTTCTGCCTGCGTCAGTTTCCGCCCGGCCTGTAATTTCAG
CTGAGTCAGACTAATGGAAGCCATTGCAGCATCAATCAGCAACTGGCGCTGTGCTTCTGC
CGCGTCTACTGCGGCGCTATGCTGTGCCTCGGTATCCGTCACCCATTTCTCACCATCCCA
TTTATCGTATGGCGTTAACGGTGAAAGCGTGACATAACCGTCTTTGATGGCACCGATATA
ATCCACTGTAACAGCTGCGCCATTTTCGATTGAGTAAACAGTCTCATTGCGATGGTCCTC
TTCATGGCTCCATCCCTTACCCGTGAATACTGCCACTTGCCCCGGAATGTTTTCGCCCGG
GTCAATACCAGTGGAACAGGCGGGCATACTTACGCCAGTATTAATATATTCATCAGACCA
GCCCGTATATTCAGACGTTACTGCATCATAATAAAAACAACGCATATCACCCGGCACTGT
AGCCAGTCCATTTTCATCAAAAACAGGTTTCATTATTTAGCCCTCACCAGAAAGTTAAAT
GCAATATTTCGCGGTCTGACAGCAACAAAATTAACACCATCTCCTACTGAGTTACTGGTG
TACTGAAATCGAGAGAAACCTGGCTCGTGTGCTGATATTCCATCGTAATCAGCAATCGCA
TGGCCGGACCCTTCTGGATAATTACCACCAAATTGCGATAAAGATGTTGCTGCCTGCCAG
CTTAATAATGCTCGCCCACTGTCCGCCCCTCGCCCATCATCCCAGATACGAATGAAGTCA
CCGCGGGCTTCAGGTAATACCAGCGAAGGAAACACTTTTGCCAGCACAGGGTAATCAGTG
GCAGAGAATTTCGCGCCGTTGAACTTCAAAAACACCATGCCGGACCAGCTTTCGATTACG
GTATCTGGCATTGCGGCGGACGGCCAGAAGAACGGAACGCCAATAGCTGGAGCACCTTCT
CCCAAACCAACGTTTATGAAAATGCAGAAATAACGAGCAAATGGCATCATTCCTGCTTTT
GTCAGGGTGATCTACCATGTTTATAGGCTATGTACGCGCATCAACAAATGACCAGGACAC
CGATTTACAACGCAATGCGTTGAACTGTGCAGGATATGAGCTGATTTTTTGAAGGTAAAT
CATCAGCATGAGACTAATAATTTAGCGTCCAATTCTGGGCTTTTTGGTTGCGCTCTCTCC
GCCCAGAATTGTGCGCCAATTAGCCCAGAAAAAACGCGAAGTTACACACTGCGCTTTCAG
CGCTTCAACAGCCTCTGCACACAGGCGGCGGCCCATATCCGGGCGAGTCAGATAGAGATT
TTTGTCGCTAATTTCAGAGCGGACTTCCAGCAAGCCCTGCGCTTTCACCCACTCTTCCGG
CACTTCTTTGAGTACGGTGTCTTTCGAACGAGAGTGATCGGCCAGGAAACGCAGCAACGC
CTGGGTACGCGGACGCGGACCAGCACGACCGGTACAGACGCGAGCCACGGTGCTGCGGCG
CAGTTCTGTTAATACGTCTGCGCGATGCGGGTTTTCAACGCCAATCCACGCTTTTGCTTC
TGCGGAACCTAAATCCAGCGCGCAGCTTTCCGAGGTCACCGGTGCTGCACAGGTGGTAGT
GGCGCATTTTGCTTCTGACGGCGCGGGGGCCGCTTGTCCCATTGACGCCATCACGCTGCG
TACAATTTCTTCAATCTGTTTTTGATCCATGATGTGTTATCTCCGCGTCATCAGAAGAAC
AGTGACGGATCGCCCGCCCGTTTGGTCAGGCGACCGTTTGCCATAATGCCCATGCTTTCC
AGCCAGCGTTCAAACTCCGGTGACGGGCGCAGGTTGAGTAACTGACGCACAGTGGCGGTG
TCGTGGAAGGCCGTAGTCTGGTAGTTGAGCATGATGTCATCACCCAGCGGCATCCCCATG
ATGTAGTTGCAGCCTGCGGTGGCGAGCAGGATCATCAGGTTTTCGTTGAGGTTCTGGTCA
GCGTCAGCGTGGTTGGTGTAGCAGCAGTCACAGCCCATAGAGATGCCGCTCAGCTTGCCC
ATAAAGTGATCTTCTAAGCCAGCACGGATAATCTGCCGGTCGTTGTAGAGATACTCTGGC
CCAATAAAGCCGACTACGGTGTTGACGATAAACGGATCGTAATGACGTGCCAGCCCGTAG
TTACGCGCTTCCATCGTTACCTGATCTGCGCCGAAGTTAGCGCCCGCCGATAGCGCAGAA
CCCTGCCCGGTTTCGAAGTAGAGGCAGTTTTCCCCGGCGATACGGTTGAACTCCGCGCCC
ACTGCGCGCGCTTCGTCGAGCATCGCCAGCTCTACGCCAAACTCTTTCAGCCCTTTTTCA
CTGCCGCAGATACTCTGGAAAATCAGCCCGCCCGGCGCACCGCGACGGATCGCTTCGATC
TGGGTGGTGACGTGCGCCAGTACGCAGCCCTGGGTTGGAATATTGAATTTGTCGATCACG
CCATAGATGGTATCCAGCACGCGGCTTAAGTTTTCCACGTCGTCAGTCACCGGGTTAACG
CCGATCACCGCATCGCCCACCCCGAAAGAAAGCCCTTCGTAGATTTGCGCGGCGATACTT
TGCACGTCGTCGCGGGTATCGTTTGGCTGCAAACGGGCGCTGAAGGTGCCCGGAATACCG
ATGGTGGTATTGGCCTTTTTGATCACCGGCATTTTCTTCGCGCCATAGATCAGGTCCGCG
TTGGAGCAAATCTTCGCTACCGCCGCGACCACTTCCGAGGTCAGCCCTTTGCGGGTAAAG
GCAATGTCGTCCACGCTGGTTTCATCGCTCAGCACATACTCACGCAGTTCGCTGATGCTC
CAGTTTTTAATCTGGTTGTAGGCCGTTTCGTTAACGTCGTCCTGAATCAGTCGCGTCACG
CAGTCATCTTCATAGGCAATCACCGGATTATTGCGGATGTCCGCTACGGTCATTTCCGAC
AACACCTGCTTTGCCGCCACGCGCTCTTGTGAGCTTGCCGCTGCAACGCCCGCCAGCACA
TCCCCCGAACGCAGTTCGTTGGCTTTAGCCAGCACCTCTTTTACATCCTTAAACTGATAT
ACATTGCCGAACAATGTGGTCTTTAGTTTCATAAGTCGTTCCCTCAGGAAGGAAATGCGA
GTGATTTCACCGTCACCGGCACAACCGATCCGCCAAAAAGAGGCGTACCAATGTCGATAT
AGTCCCCCGCGCGGACAATCACTTCGTCAATGACTGCCAACGGGAGTTGTTGTAGCTGTG
GGCGCAACAACATGCCCAGAGCTTTACCAAAGTCCTGCCCGGCCACCACCAGCAGGGGAT
GCGGATTCGGAAAACGCGCGACGAAATCGACCAGCGCGTTGATGACCGTTAGTACCGCGG
CGTAACGCACAGGCAGCGAGGCGGGAAGCGCCAGCACGTACGCGTCAGTTTTGGGATCAA
GATCCAGTTGAATTAGCGCTTGTTGCCAGGCACTCACCAGATCCGTTTCATCAATTGGGA
TCGCCACCGGCAAATTGCGCAGCGGCAGTTGTACGCCCTCCAGCCAGATTGTGCTGCCAG
AGAGCGAAAGGGTATGTGCACCCGCGCCAATCACCGTGGCGCGTACGGTTTGCGCCGGAA
ACTGCACGTTCATCTCACGCAGACGAGGATGCTCATGCAGCGCCGTTGCCAGAAGCGGGC
CAATATCGGCAAAACAGAACGGGTCAGCGGGCTGGTGGCGATAACATTCGCCCACGCCGC
CAGAAAGCGTAATGATTTCGGGCGTAACACCTGCGGGCAGCAAACCGGTTTTCATTAATG
CCTGCGCGAGCGGCGAGAGCGTTCCGTCAATCACTTCGACAATCAGCTCTGCCATCCGGC
GGGTAACCTGCACCAGCTGCGCGCCGGTCAGCGAACGGGCGTCAGTGCCTGCACCGAAGC
ACTCATCCACTATCATCTGCCCCGGTTTATGAGCGTAAACCACGCGCCCCTGGCTGTCGG
TTTCCAGCAGGCGACCGCCGACGTTGAGGCAAGCGGTGCCGCTGATTTTTCCGGCATCAA
ACAGGGCGTAGTTCGCGGTGCCACCGCCGATATCGATATTCAGGACCCGACACAGCCGTT
GTTCAGAAAGGGTTTGCGCCCCGGCACCGTGACCGGCGATCACGGATTCGAGATGCGGTC
CAGCGCTGGCGACGACAAAATCGCCCAGCGACCGGGAGAGGGCCATCACCGCCGGGCGAG
CGTTGCGGGTTTTTGCGCTTTCACCGGTGATAATGATGGCACCAGAATCAACGCTTTCCG
GCGCAATGCCCGCAGCCTGATATTGCTTGAGGATTAAGGTTTTCAGTTCCGCTTCTTTTA
AACCACCCTGTTTATCGACCTGTCTCTTGATCAGATCTCCTGATCAAGAGACTTCATCAC
CAGGTAACCCTCAACCATATCCTGAAGTCTGAACCAGCCATCCCACATGACTACCCAACC
GGGGCGACCGGTGCGTTTGCTGTCATGCCATCGCCCCAGTTTCGCCAGTTTCAGACAGGC
CCATTTCAGTGTCGGCATCTGTGACGGAAGCGGTTTTCCTTCCAGCTTAACCCACAGCAG
TTTCCACTCTGTCGGCGTCAGTATTTTCTCACAGCTGTCATTTTGTGTTTCTTCACTGAT
ACCGCCCTGCCGCAGGCCCAGCACCCGCACCGCGATAAACGCCTTGATAACCACCATGCG
CTCGAGGTTATCCCGGGTCTGCATTCGCAGCGATTCCACACATGTACCACCACTTTTCCA
CGCCTTGTGGTATTCCTCTATCAGCCAGCGTCGCTCGTAATGGCTGACGATACGTCGCGC
ATCGGCGGCACTCGCCACTTTTTCTGACGTCAGCAGATGCCAGCAGGCGCCGTCCTCTGC
CTGCTCCCGGCAACAGACATACGTGAGCGGGAGCGCCTGGCCGCTGTTGTCGGGATTTTT
TATGCTGACTTCGCTGTAACTGATGAACATCCGGGCCTGGCGGGCTGCCCGCCCGCCTTT
TTGCATCACATTCAGCGTGTGGCTTCCCGCGGTTGCCAGGACTTCCGGCAGTTCGAAGAG
CTTGCCGGGTGCTTCTTCCAGCCGGCGATTCTGTGCTGCACGCACCACGAAGCGCTGCCC
GTGGCTGACTTTATAATGCAGGTAATGCCAGATATCCGCTTCCCGGTCACAGACAGTGAT
TACCCGTTTCTGTATCTCCCCCAGCCGTTCGGCCATGCGCTCCGAAGCCTGCTGCCAGCG
GTAACTTTCTTTTTCTTCATAGGGACGTTCTTTTCGCTGGTGCTTAACACCGTAGGTGTC
CGTGGCACGACTCCAGCGCTGCTGTTCGATAAGACCGACTGGCAGGGCGCTGTCGGGGGC
GTACATCAGGACAGAGTGAGCCAGCAGCCCGCGCGTCTTCGGGTTAGTGGTGGTATTCCC
CAGGTCATCAGATGCCGTACTGTGACTGAAGTTAATGGTGGTGGTGTCTTCCAGCGCGAG
GAGCAGCGGATGAGCCTCACATGCCCTTACAGTGGCGGTAAATCCGGCTTCGGCAATGGC
TTGCGGGGACACAGACGGGTTACGTATCAGGCGGTACGCACCTTCAACCTGAGCAGTGGA
CTGGGATGATTTCACAATAGAAAGACCTGCATGCTGAGCGAGAGAAGAGGCCAGTGACAC
AAGGCGTCGTGTACGACGCGGATCACCGAGACGGGCATGTCCAAACTGCTCGTTAGCCCA
TGAATAACAATCAGAAAGTACCATAACAGACCCGAAGAAAATGAAATATAAGAGAAGATC
AACAGGTGAGGAAAAAGTTCAAAAAATCGCTGCCGGGGAGGAAGGAAACTACCGGATGGA
AAGAGTCCCCCTAAAGCAGACTGACAGACATCACAAATCCCCGGGTGGGGATTTGTGTAT
AAGAGACAGGTTTATCGACAGGGGTAAAGAACACCGGGCTTTGCCAGCTAATTTCGCGTT
TGATGAATTCGTAGCGCGGCACCTGCGACACCGCCGCACGGTTAACCAGCTCCAGGTGGG
AGAAGATCACCTGGGTGGTGGTGGTGCCGATATCGATACCGACGCTCAGTAGCTGGCGAG
TGTTCACGATTGCGCCTCCGCTTCAGTTTTAGCCGCGGTCGCGTCTTCTTTTGGCACCAG
CATCATCGCCACGCCAATTGCCGTTACGCCGCCGATCAATTTGCCGACAATCATCGGGAA
GATCATGGCGTTCATGTTGGCAGCGGCGAAGCCTAAATGGTCGCCCAGGGCGAAAGCAGC
GGAAACGGCGAAGGCGCAGTTGATGACTTTGCCGCGGGTATCCATCTGCTTCATCATGCC
AAACATCGGAATGTTGTTGGCAAGCGTTGCCACCATGCCGGCTGCCGCGATATTGTTCAT
ATTCAGCACCTTACCGACGCTCATCAGCGGTTTTTCAAACCAGCGAGTCAGCAGCAGTAC
CATTGGATACGCCCCTAACAGAACGCAGGAGATCGAGCCGATAACTTCAATGGCGCGCAT
CACTTCACCGGGTTTATCGCCAGGGGCCATAAAGATAGGATCAAGACCCGGGATCAGTTC
CCAGCCAAGGAGGAATTTCACTACCGCAGCGGCAAGACCGAGGGTGATCAATGCAACGAG
GAATTTGGCGAAGATCTGGAAGCCGTTGATCATTTTTTCCGGGATGAATTTCAGCCCCAG
CGCCACCAGCACCGCAACGATAAGTACCGGGATCATGTTCATCAGGATCAGCGCAAAGGT
GAATTCAACAGGCTGGCCGTTGATCTGCACACCGGAGTACATCGCTACCAGACCACCAGC
GATACAGCCAATCGGAATGGTCACTATGCCCGCCAGCACGCCGAGCGCCAGATAACGACG
GTCAGAAGGTTCGATAATGCCGAGCGCCACCGGAATAGAAAACACAATCGTTGGCCCCAT
CATCGACCCGAGAATTAACCCAGAGTATAGCCACGCTGCTACGTCACCGCCCGCCAGCTC
TTTGGCGAGGAAGAAGCCGCCCATATCGCACGCCAGCAGTGTTCCGGCGAACATTGACGG
GTTTGCGCCGAGCATTTCGTAAACCGGGATAATCACCGGTCCGAGAACGTGGGCCAGTAC
CGGTGCCAGTGCGGTCATACCGACCATCGCCAGGCCCAGAGCGCCCATTGCCATAAAGCC
TTCTTCGAACTGACCGCCGGATCCTTCGATACTTTTACCGAACTTACCGAGGAAACGAGC
AGAACCGCCGAACTGCGACAGGATCCTGTCTACGGCAGCTATCAGCATAAAGAACATCAT
GATATACATGATGATTTCGTTAATTCCCATCGCCTTTACTCCCTGTTAGTTGTTATTTAT
TGGCGGATGCGGCGTGAACGCCTTATCCGCCCTACATGTGCAATCCCGAAGGCCAGATAA
GACGCGGCAAGCGTCGCATCCGGCAATTGCACCGCGCCACTGGCGGATGCGGCGTGAACG
CCTTATCCGCCCTACATGTGCAATCCCGTCGGCCGGATAAGACGCAGCAAGCGTCGCATC
CGGCATTTATTGCGCCGCTGCGTACAGGCCGACAATCTGCTCCAGGCTGGCGGTACGCGG
GTTACTGCGCAGACAAATATCTTCCAGCGCGGCCTGCGCCCATGCGCCGTAATGCGCAGA
TGTCGCACCAACATCGCCCAGTCGTTTACCAATCCCAACTTCAGCAATCAGCTCACTTAC
CGCGTTAATAGCGTCACGATCGTCGGATTTTTTAGTTCGCAGCGCCCGACCAATCTGACT
AAACCGATCACGACAAACCATCCGGTTAAATTCCATCACCGTTGGCAACAACATGGCGTT
CGCCAGACCGTGCGGAATATGCAGCGCCGCCCCTGGCTGATGCGCCATCGCGTGGCATAA
CCCAAGCCCGGCGCTGGAAAACGCCATTCCCGCCATACATGAAGCCAGCAACATGCTCTC
GCGCGCGGCAAGGTCATGGCCGTAGCCCACCGCTTTCGGCAGTGATTTGCCAATCATCGC
AATGGCACCAATCGCCAGGCTGTCGGTAAACGGTGTAGCGTTCAGCGCGCTGTACGCTTC
AATGGCATGGGTTAACGCATCAATGCCAGTCATCGCCGTGACATGCGACGGCACGCCTTC
GGTCAGCACAGCGTCGAGAATCGCCACATCCGGCATCAGCGAGGCGTGGGCTAACACCTG
CTTGCGCCCGCTCACCGCGTCGATAATCACCGTCACGTTAGTCGTTTCAGAGCCGGTTCC
GGCGGTCGTTGGAATGGCAATCAACGGCAGGCGCGGTTGCAGAACGCTGGTTTCTGACAT
TTCTGCCAGCGTGCTATCCGGGTTCGTCACCAGCAACGCCACGGCTTTCGCCGCATCCAG
CACCGAGCCGCCGCCAAACGCGATCACCCCGTCACAACCTGATTCACGCAACTGCGCCAC
GGCTGCACACACGTCGGTGATGCACGGTTCGCCCACCGGACATGGCCAGAGCGTCATGGC
GATACCTTTAACGGCCAGGCTACGTGTCAGCCCGGCGGTCATCCCTGCCTGATGCAAAAA
GCTGTCTGCCATCACGAACAGATGTTTCAACCCACGCGTTTGCGCTTGCTGCCCGCAACT
GCTCACCGCGCCCGGACCGCAAAGCGTCACCGGTGGAACGCTAAATGTTTTTACCCGTTG
CAGATTCAGGGTATCGAACGCCTGAAAAAGCGCCGTTTGCAATTCACTTTGCATAGATCC
CCTCCGCTTTCTCTCGCCCACTACTGGCGATTGCCAGCGGGGTCATAAACAAACTGTGCT
GCGGTAAATGCACCTGTAACGCCGGAAATTGTTTGCAAAACAGCGCCGCTACGCCCGGTT
GCATACAGGAACCGCCCGCCAGCCATAAATCCGTAATGCCCTGCCCTTCAATATGCCGGG
CCACAATGTCCGCCATTTTTTCGTACACCGGTTTCACCGCGGGCCAAATCTCGTCACCGT
GACCGCGTTTGTACTGCTCTGCCTCTTCCAGCGAAATACGGCGATTTCCGGCGAGAGTCA
GAGAGATGTGATGTCCGCCGGTGGCTTCATCCGCCGAGTACGTCACTTTGCCCTTTTTCA
CGATGGCAATGCCGGTAGTGCCGCCGCCGATATCCACTACACCGGCGTTGTCCAGTTGCA
GCAGATCCGCAACTGCGGTTGGCTCATCCAGTACATGGCTCACTTCCAGTCCGGCAGATT
CCAGCACGTTGATGGAAATACGCGGGTCCGTACCTGGAGGAAAAGAGGTCGCCGCATGGC
TAAAACGGCGACCGAATTGCTGCTCGAGGGTGTCGAGATGGCGACGAACAATGGTGACCG
CACCGAAGAAATCCCAGACGATGCCGTCGCGGACCACATCAGCCCAGTCGAGGCATACCG
CCACCGGCTGACCGTCGCGGTCGACAACCATCGACACCACATCGCAGGTGCCCAGATCCA
CCCCCAGCCACAGCGGAGATTCCGTCGCGGCGGGCGTCTGGTTACACAGCGTTGCCGCCG
TTTGCAGACGTGGGGTGAGCCATTGTTCGTCGTGCGCCATCTGTTACTCCTTAAACAATG
CGAAACGCATCGACTAATACACAGCGACGCAGACGGACAAACGTCCGCGCGCTGGTTACC
CCTTCACCGGTTGGCGTGGTGATGGTCATCGTGGTCCAGCTTTCCCCGCCCAGCCCCAGC
CCGGCAATACACGGTCCGTTCTTAACGAAAATGCTGGTATCAATGGCATTCGCCATCTGG
TTCATGTTTTCGATATTGCGCGAGTGCATTGCCGCCGTGTGGTGGCAACCGCCTTCCAGT
TTCACCGCCAGCGCAATGGCATCCGCCACGTTGGCGACGCGCACGACGGGCAGCACCGGC
ATCATCAGTTCGGTTACGGCAAACGGATGTTCTGCGGTGGTTTCTACAAACAGCAGTCGC
GTTTCTGACGGGACGTTCAGGCCGATTGCCGCCGCGATTTTCGCCGCATCGCGACCAACC
CAGTCACGGCTGACGGTGCCTTTTCCGCGCTCGTCGATATTTTTCAGCAACACCGATTGC
AGTTGCTGCGCCTGCTCTGCGGTCAGTTTCACCGCATGCTGGCCTTCCATCAGACGCATC
AGTTCATCGGCTACGCTATCCACAACAATCAGTACCTTTTCGTCGGCACAAATGATGTTG
TTATCGAAAGAAGCGCCTTTGACGATGGACTGAGCAGCACGGGCGAGGTCGGCGGTTTCA
TCCACCACTACCGGCGGGTTACCGGCACCTGCCGCAATCAGGCGTTTATTGGTGTGTTTG
CGCGCCGCTTCCACTACCGCTTCGCCGCCGGTCACCACCAGCAGGCCGATACCCGGAAAC
TTGAACAAGCGTTGCGCGGTTTCGATATCCGGATTTGCTACGGTAACCAGTAAGTTTTCC
GGCCCGCCTGCGGCAACAATCGCCTGGTTGAGCAGCGTAATCGCCCGCTGGGAGACTTTT
TCGCCGCCGGATGCGGGGCAAAAATGACGCTGTTGCCCGCGGCAATCAGGCTGATGGCGT
TGTTAATTACGGTTGCCGCCGGGTTAGTGGAAGGCGTCACCGAAGCCACCACGCCCCAGG
GTGCGTTTTCAATTAGGGTCAGGCCGTTGTCGCCAGTCAGCACTTGCGGAGAGAGGCACT
CAACGCCTGGTGTGCCGCGCGCCTGAGCGACGTTTTTGGCAAATTTATCTTCAACGCGCC
CCATGCCGGTTTCACTGACGGCAAGTTCCGCTAAATCTCTGGCGTGTTTTTCGCCTGCTT
CACGAATGGCAGCAATGGCTAACTGGCGCATTGCCACGCTTTTTAACCCTTGCTGGGCGA
CTTTGGCTGCCGCAACGGCGTCATCCAGGGACGCGAAAACGCCCATCTCATGAACGGCGG
CGGGCGGCGTGTCACTGCTTTGCATTTTCAGCAGTACCGCTTTCACCACCTGTTCAATAT
CCTGTTGATTCATGATGTTCTGCCTTATTTGTGGAAAATGACCTGACCGCCAGACACCAC
CTCATCGACGATGCCAATCACGCACAGATCGACCGGTGACGTTTCGCTTTTATGCGCCTG
GCGGGCGGAACTGCCACTCACCAGTAACACCCACTCCCCGGTTCCCGCGCCAATATTGTC
GATGGCGACGGCGCATTGCCCGTCAGGATTACCTTGTGGATCAATCATTTCCACCATCAG
CAATTTGTCATGCGCCAGTCCGTGATGGCGTACGGTACAAACAATTTGTCCAGTGACGAC
TGCCAGTTTCATACCCGCCTCCGTGGCGTATTTCAGGTAAAAGCTCCCCCTACCCTCCGC
AGAAGGTAAAATGAAAAAGGAGAGAGCGTGACGCCCGAATCGACGTCACACAGGGTGATT
ACAGGTTGCTGCTATCGCCTTTCAGGCCGATCGGGAACACTTCTTCCAGGTCGCCGTGCG
GACGCGGGATAACGTGTACAGATACCAGCTCGCCGATACGCTGTGCCGCTGCGGCACCGG
CATCGGTCGCGGCTTTACAGGCTGCAACATCACCACGAACCATGGCAGTACACAGGCCGC
CGCCAATCTGCTTAACACCAACCAGCTTGACGCGCGCAGCTTTAACCATCGCGTCAGAAG
CCTCAATCAGTGCAACCAGGCCCCGGGTTTCGATCATTCCTAATGCTTCCATTGTGCTTT
CCTCTTTATCAGGGTCCAGAACGGGACCGTTCATTCAACCAGTGTTTGTAAACTGCTTTC
GCGGTTCACTTCTGTCTGACGCGGCACAGCTGCCACCAGCGCCAGTTCGATAATTTCCTG
CACGCTACAACCACGAGAGAGATCGTGCATCGGCGCGGCAAGTCCTTGTATCAATGGCCC
GACGGCACGATATCCGCCAAGTCGTTGTGCGATTTTGTAGCCAATATTTCCTGCCTCCAG
CGACGGAAAAACCATCACATTGGCTTTGCCCTGTAACGGGCTGGCAAGCGCTTTTTGCGC
CGCCACTTCCGGCACGAAGGCGGCGTCAAACTGCAACTCGCCATCGACAACCAGCTTTGG
TGCGCGCTCACGGACGATTTCTGTCGCCTGCTGGACGTTGGCAACGCAGGGGTGACGGGC
ACTACCGTTGCTGGAAAACGACAGCATCGCCACGCGCGGTTCTTCTCCGGTGATGGCGCG
CCAGGTTTCGGCGCTGGCAAGCGCGATATCCGCCAGTTGTGCCGCCGTCGGCTGTGGCAC
CACGCTGCAATCGGCAAAGCCCAACGCCGGACCGCTGTACTGTGGCAGCATCAGGAAAAT
GGATGAGAGCGTTTTACAGCCTGGCTGCAAGCCGATAATGCGTAATCCGGCACGCAGCAC
ATTCGCCGTGGAAGAGAGGTTGCCCGCGATACAGACATCCGCTTTACCGGCGCTGACCAT
TGCGGCGGCGAACATCAGCGGGTCGGTAAGTTTTTCCAGCGCATCCGGCGGCGTTTTTCG
CCCGCGCGGGCCAGCCAGCGATGAGCAAATTCTTCCCGCATTGCGAGGTTGCCATGCGGA
TCAATCACCTGTAGCCCGTCCATCGCCACGCCATGACTGAGCGCAAACTGACGAAGTTCA
AACGGATTGGCGACCAGAATGGGCGTTGCCAGACCTTGTTGATGTAAATATTGCGCAGCT
TTCAGCACACGTTGATCTAACGCATCCGGAAAAACTACTCTGGCGGGCGCTCGCAACGCC
AGTTCACGACAACGTTCAATAATCATTGCGTTTCCCCCAGTCGTTGTTGGATCTGCTTCA
CCGTTAGCGGCTGCTTCGTTACGCTCAGGATCATCATCACGTAGACCGTGCTGGAAAGGC
GGTTCAGCGCCTGCAAAATGTCCGGGCGTAATACTTCAAAGCTGCGGGTGATAAAGACCT
GCGCCGCGACGGTTTCGGTTTCCCGCACTTTGGTGCGTAACAGATTCAGCAACGCCGCAT
CGCGCCCGTGGCTGGCTTCCGGCACCAGATGATCGTGGTCGAGATAACGCAGCGGCTGGT
GAGAAAGCCGATGCAGATCTTCGTCAGAAAGCCCGACAATCGCTTGATCGCCCAGCGGTT
CCCCCAGCGCATCGGCACGCATAATGTTGCCAAGACGCGAACGGATATCCGCCAGCCACG
GCTGCCACGGTTCCGCCAGTTCAATTTGCAGCCACACTGCCAGCGCAATGGTGCTGTCGA
GAACAGCGCGAAAAGCCAGGCGCGGATCGCTTTTGGCAACCATTTTTTCCGCCGACAGGT
GAGTCAGCGTATCCGGCTTTTTTGCCACCGGCTGGCGGCACAGTTCGCAGCACGCCTGCG
GATGTTCATCGCTACTGGTCAGCCCATGAACGGGCTGCGGCTGCTGCTGTTCATCGTCAA
CAAACAGGCGGCCCTGCTCGTCAATAAACTTGATGCGCAGATGGCGGCTTTCCAGTAACT
CCCGGGCAGAGGGCGTCAGGCGACTGTCCGCAGGGAGATGGATCTCTGCGCCTTCGCTGA
GCGTATGGTTCGCTCTTAGCCATGCTTCGGTGATGAAATCTTTCATAAGGATTGCCAGTT
AGCCGGCCAGGCGACATACAGGAATTTCACGCTGGATGTCGTACCAAATTCGATGCTGGA
GCCTTTCGGGATAAACATCACATCGCCCGCTTTGGCGATCATAGTTTCGCCTTCGTGGCG
AACATGCAGCTCCCCTTCCAGCACCATGTCGATTTCGTCGTAGTTCAGGGTCCACGGAAA
GAAGGCGTTCTCCCACTGCATGAAACCAGCGGCCATACTGCTGCCGTCGTCTCCGGTCAC
GAGATCAGTCAAGCCTACGCAGTGCGGCTGTGCGCCGTCGAAACGACCAAACTTGACGCT
GCTACCATCAATAACTTTGATGCCGCCTTTGCCGGTCACCGATTTAAAGCTCGGCTGCAG
TGCACCCTGTTCCAGCGACTGTTTTTCCTTCATCACTTTTTCCATCAGCTGCGCGACCAG
GCTTTCGGTAAACTGACCTTCCGGCAGTTGGGCGATAATGGTTTCACGGATGCGCTGGCT
TTCGGTTTTATCGGCTGATGCGCTGGCGGGAACAGACGCCGTTACCGGGATCGATTCATC
ACATTCGGTGATGGTAAAACCCAACAGATCAGCCACTTCACGAGCTTCCGGGGTAATAAT
GCTGGCGCGCAGAACCACGGACATTGCCAGTTCGCCGCGCGCGTGTGCTTCACGAATATC
ATTCGCTGTGATGAGTTTTTTCACCTGCTTCCTCCTGTTTGGTGAGAGATGCCAGATAAT
CCACCAGTTGCTGCACGCTTTGCGGGTCGTGGCTGTTTAGCTCGAAAATCGGCTCTTCGA
AGCCCGTCTCAAGCAATAACTTTCGCGTTGCGGCGACGTCAGCATCTGGCATGTCCGTTT
TACTGATGACGGCGATTTGCCGTTTGCTGACGCCAATATCCAGCAACCCGGCAGGCAACC
GACTTTCCGGGTCATTCGCGCCGTGGACATAGATCAGCATGTCCACATCCTGTAGCGTGG
TAATTAAGGCGTGATACCAGCGGGGATGGCTAAAATATTCACCCGGCGTATCAATATCGC
CATTATCATTAAATTCCACGGCCTGTGTTTTTCTTGCGAGGGTATAATTCCCCTGCAACG
CATTAAATAACGTTGTTTTTCCTGCCCCGACGGTACCCACAAACGCAATTCGTTTCATGA
ATGCCTCATATTAACTTTTGGTCATTTCACAAAGCGTATAATTTAATAAGCGTCCTAAAC
CACTGACGGTTTGTGATAACGCTTCTTCTACTGCGCCCACCGAGCCATAAATCACCAGCG
CGCCGCTAAAACGGTCGAGAAAACCGATATGCACATCGGCGGCTTTCAACGCTAAATCAC
CGGCGATCATCGCCGTTTCTCCGGGAGTTAGCGTCATAATGCCGATTGCGCCCGCATCCG
GAACGCCGATTTTCTTCGCCAGTTCCTCGCCGGGATGCGCGATGAGATGCGCCAGTGTGA
CCTGTTTACCGGGCACAAATTCCTGAATGATGCGTTCTTTATCCATGAGTCGCCGCCTGT
GAAAAACTTTCGTGTATCGTGACAATTTTTCGTCAGAGTAAATAACAAAATTCGGCAAGC
GCGTTTAAAAGGTGAGGTAGATCACTAAGAATGGAGAGATATTTGCTGTGGTGCATAAAC
TTTCATATGCAACGCATGAATATAAATAAAATAATATCGAGATATTTTATATACTGCTTT
TTTATTATTCGCAAACTCAGTAATAAACTTTACTAATATATTGCAGCTAAACCGCTTACC
CTGAATATTCAGGGTAAGCGTGAGAGTTAAAAAAGAATTACAGCGGTTGGGTTTGCGCTT
CAACCACGGCCAGCGCCACCATGTTGACGATACGACGTACCGATGCGATCGGCGTTAACA
CGTGAACCGGTTTCGCCACCCCCATCAGCACCGGGCCGACAGTCACACCTTCCGAGCTGG
AAACGCGCAGTAAGTTGTAACTAATGCGGGCAGCTTCCATGTTCGGCATCACCAGAATAT
TAGCGGAACCTTTCAAAGGGCTGTCCGGCATACGGTCGTTGCGAATCGCTTCCACCAGCG
CTGCATCGCCGTGCATTTCACCATCAATCATCAGTTCTGGCGCACGTTCCCTGACCAGTT
CCAGCGCCTGACGCATTTTGCTCGACGACGGGCAGTCAGAAGAACCAAAGTTGGAGTGCG
ACAACAGAGCCACACGCGGCTCAATACCAAAACGACGAACAGTTTCTGCCGCCATCAAGG
TGATCTCCGCCAGCTCTTCTGCATCAGGCTCATCATTGACGTAGGTATCGGCAATAAAGG
TATTACCACTCGGCAACAGCAGCGCGTTCATTGCACCTGCGGTGTGAGCGCCATCGCGAT
AACCAAAGACATTTTTCACCACGCTAAAGTGTTCATGATAATCGCCCACCGTACCGCAAA
TCATTGCATCGGCTTCGCCACGCTGAACCATGATCGCGCCGATCACTGTCGGGTTACTGA
TCAGCGCACGCTGCGCCTGCTCCTGAGTGACACCGCGACGCTTCATGATCTGGAAGTATT
CGGTCCAGTACTCTTTAAAGCGCGGATCGGATTCGTTATTGACGATCTCAAAATCAACGC
CCGACTTGATCTGCAAGCCCAGTTTCTGAATGCGCATTTCGATCACGTTCGGACGACCAA
TAAGGATCGGTTTCGCCAGTCCCAGCGTTACCAGTTCCTGAGTGGCATGCAGAACGCGCG
CCTCTTCCCCTTCCGGCAGAACTACGCGCTTCGGCGCTTTGCGAGCCTGGGAGAAAATCG
GCTTCATAAACAGGTTGGTTTTGTAAACGAACTCAGTCAGCTTGTCGATGTAGACGTCGA
AATCAGCAATCGGACGCGTCGCCACGCCCGACTCCATCGCCGCTTTCGCCACCGCAGGAG
CGATCTTAACGATCAAGCGCAGATCAAACGGTTTTGGAATGATGTATTCCGGGCCGAAAC
TCAGATCTTGATCGCCATACGCTGAAGCCACCACTTCACTCTGTTCCGCATGGGCCAGTT
CTGCAATCGCGCGTACCGCCGCCAGTTTCATCTCTTCGTTGATGGCGGTTGCGCCAACGT
CCAGCGCGCCACGGAAGATAAACGGGAAGCAAAGGACGTTGTTCACCTGGTTCGGGTAGT
CGGAACGGCCGGTACAGATGATGGCATCCGGACGCACTTCTTTCGCCAGCGGCGGCAGAA
TTTCCGGTTCCGGGTTCGCCAGCGCCAGGATCATTGGCGCCCGAGCCATTTTCTTCACCA
TTTCCTGGGTCAGCACTTTCGGGCCGGAACAGCCGAGGAAAATATCCGCGCCTTCAATCA
CATCATCGAGGGTACGTTTACCGTCATCCACCACCGCGTATGCGGCTTTGGTTTCCGCCA
TGTTTGGCTCACGGCCCTGATAGATAACGCCTTTTGAATCGCAAACCACGATGTTATGTT
TTTGCAGACCCAGCGCTACCAGCAGGTTCATACAGGCGATTGCTGCGGCACCCGCGCCAG
AAACCACCATCCGCACGTCGGAGATGTTTTTCTCCACCACGCGCAAGCCGTTGAGGATGG
CGGCAGTGCTGATAATTGCCGTGCCGTGCTGATCGTCGTGGAATACCGGAATATTCATCC
GCTCGCGCAGTTTCTGTTCAATATAGAAACATTCTGGCGCTTTAATGTCTTCGAGGTTGA
TGCCGCCAAAGGTCGGTTCGAGCGCAGCGACGACTTCAATAAATTTGTCAGGGTCGAGTT
CATCAACTTCTATGTCAAATACATCAATCCCGGCGAATTTCTTAAACAGAACGCCCTTGC
CTTCCATCACCGGTTTGCCTGCCAGCGCGCCAATGTTGCCTAACCCCAGCACCGCCGTAC
CGTTAGAGATCACCGCTACCAGGTTACCGCGCGCGGTATATTTGTAGGCTTTTAACGGGT
CTTTTTCGATTTCAAGACAAGGTGCGGCAACGCCTGGTGAGTAGGCCAGCGCCAGATCTC
GCTGCGTTGCCAGAGGCTTGGTTGGAGAAACCTGGATTTTCCCTGGAACTGGAAATTCAT
GGAAATCAAGTGCACTTTGTTTTAACTGGTCATCCATTTGGTTGTTCCTTTCACGTAACG
TTCACAAATAAAGTGTGTGGGCAACAGCCCCTGTCCACAACGTGGCGCACATTATTACCC
TGCCGGAGTCTACAGACTTTGAGCAAGTCCAAACTCTCACCATTAATATAATGTTTTGGT
AATAATCCTATAACACTGATGTTACCTGCTTAATCCAGCAATACCATGCCTGTCTGCTAT
GCTTTTTTGATGCGTTTAGCGAAATTTCTCAGAAGTGTGAATTAACGCACTCATCTAACA
CTTTACTTTTCAAGGAGTATTTCCTATGAACGAGTTAGACGGCATCAAACAGTTCACCAC
TGTCGTGGCAGACAGCGGCGATATTGAGTCCATTCGCCATTATCATCCCCAGGATGCCAC
CACCAATCCTTCGCTGTTACTCAAGGCTGCCGGATTATCACAATATGAGCATTTAATAGA
CGATGCTATCGCCTGGGGTAAAAAAATGGCAAGACCCAGGAACAACAGGTGGTCGCAGCG
TGTGACAAACTGGCGGTCAATTTCGGTGCTGAAATTCTCAAAATCGTACCCGGTCGCGTG
TCAACAGAAGTTGATGCACGCCTCTCTTTTGATAAAGAAAAGAGTATTGAGAAGGCGCGC
CATCTGGTGGACTTGTATCAGCAACAAGGCGTTGAGAAATCGCGCATTCTGGTCAAGCTG
GCTTCGACCTGGGAAGGAATTCGCGCGGCAGAAGAGCTGGAAAAAGAAGGTATCAACTGC
AACCTGACGCTGCTGTTTTCTTTTGCACAGGCGCGGGCCTGTGCAGAAGCAGGCGTTTTT
CTGATTTCGCCGTTTGTCGGGCGTATTTATGACTGGTATCAGGCACGCAAGCCGATGGAC
CCGTATGTGGTGGAAGAAGATCCAGGTGTTAAATCAGTACGCAATATCTACGACTACTAT
AAGCAACACCACTATGAAACCATTGTGATGGGCGCGAGCTTCCGTCGCACCGAACAAATC
CTCGCCTTAACCGGCTGCGACCGACTGACTATCGCACCGAATTTGCTGAAGGAACTACAG
GAAAAAGTTTCGCCAGTGGTACGTAAATTAATCCCACCTTCTCAGACGTTCCCACGCCCA
GCTCCCATGAGCGAAGCGGAGTTCCGTTGGGAGCACAATCAGGATGCGATGGCGGTAGAA
AAACTGTCTGAAGGCATTCGTCTGTTCGCCGTTGATCAACGCAAACTGGAAGATCTTCTT
GCCGCCAAACTATAAACCAGCCACGGAGTGTTATATGTCCCGAAAAGACCTTGCCAATGC
GATTCGCGCACTCAGTATGGATGCGGTACAAAAAGCCAATTCTGGTCATCCCGGCGCGCC
GATGGGCATGGCTGATATTGCCGAAGTGCTGTGGAACGATTTTCTTAAACATAACCCCAC
CGACCCAACCTGGTATGACCGTGACCGCTTTATTCTTTCCAACGGTCACGCGTCGATGCT
GCTCTACAGTTTGCTGCATCTGACCGGTTACGACCTGCCGCTGGAAGAACTGAAGAACTT
CCGTCAGTTGCATTCGAAAACCCCTGGTCACCCGGAAATCGGCTATACGCCAGGTGTTGA
AACCACCACCGGTCCTCTTGGACAAGGTTTGGCGAACGCCGTCGGGCTGGCGATAGCAGA
GCGTACGCTGGCGGCGCAGTTTAATCAGCCGGATCATGAAATTGTCGATCACTTCACCTA
TGTGTTTATGGGCGACGGCTGCCTGATGGAAGGTATCTCTCACGAAGTCTGTTCGCTGGC
GGGCACGCTGGGGCTGGGCAAGCTGATTGGTTTTTACGATCACAACGGTATTTCTATTGA
TGGGAAAACCGAAGGCTGGTTTACCGACGATACCGCAAAACGATTTGAAGCCTATCACTG
GCATGTGATCCATGAAATCGACGGTCACGATCCACAGGCGGTGAAGGAAGCGATCCTTGA
AGCGCAAAGCGTGAAAGATAAGCCGTCGCTGATTATCTGCCGTACGGTGATTGGCTTTGG
TTCGCCGAATAAAGCAGGTAAGGAAGAGGCGCACGGCGCACCACTGGGGGAAGAAGAAGT
GGCGCTGGCACGGCAAAAACTGGGCTGGCACCATCCGCCATTTGAGATCCCTAAAGAGAT
TTATCACGCCTGGGATGCCCGTGAAAAAGGCGAAAAAGCGCAGCAGAGTTGGAATGAGAA
GTTTGCCGCCTATAAAAAGGCTCATCCGCAACTGGCAGAAGAGTTTACCCGTCGGATGAG
CGGCGGTTTACCGAAGGACTGGGAGAAAACGACTCAGAAATATATCAATGAGTTGCAGGC
GAATCCGGCGAAAATCGCTACCCGTAAGGCTTCGCAAAATACGCTTAACGCTTACGGGCC
GATGCTGCCTGAGTTGCTCGGCGGTTCGGCGGATCTGGCTCCCAGCAACCTGACCATCTG
GAAAGGTTCTGTGTCGCTGAAGGAAGATCCGGCGGGCAACTACATTCACTACGGGGTGCG
TGAATTTGGTATGACCGCTATCGCCAACGGCATCGCGCACCACGGCGGCTTTGTGCCGTA
TACCGCGACGTTCCTGATGTTTGTTGAATACGCCCGTAACGCCGCGCGGATGGCGGCACT
GATGAAAGCGCGGCAGATTATGGTTTATACCCACGACTCAATTGGTCTGGGCGAAGATGG
TCCGACGCACCAGGCTGTTGAGCAACTGGCTAGTCTGCGCTTAACGCCAAATTTCAGCAC
CTGGCGACCGTGCGATCAGGTGGAAGCAGCGGTTGGCTGGAAGCTGGCGGTTGAGCGCCA
CAACGGACCGACAGCACTGATCCTCTCAAGGCAGAATCTGGCACAGGTAGAACGAACACC
GGATCAGGTTAAAGAGATTGCTCGTGGCGGTTATGTGCTGAAAGACAGCGGCGGTAAGCC
AGATATTATTCTGATTGCCACCGGTTCAGAGATGGAAATCACCCTGCAAGCGGCAGAGAA
ATTAGCGGGAGAAGGTCGCAATGTTCGCGTGGTTTCCCTGCCCTCGACCGATATTTTCGA
TGCCCAGGATGAGGAATATCGCGAGTCGGTACTGCCTTCAAATGTTTCTGCCCGCGTGGC
AGTAGAAGCGGGTATTGCCGATTACTGGTACAAATATGTTGGTCTGAAAGGGGCAATTGT
CGGGATGACAGGTTATGGGGAATCTGCTCCGGCGGATAAGCTGTTCCCGTTCTTTGGCTT
TACCGCCGAGAATATTGTGGCAAAAGCGCATAAGGTACTGGGAGTGAAAGGTGCCTGATG
GTGATCGCCGGATGCTGATTGTCGGATGTGACGCTGGCGCGTCTTATCCGGTCTACATGT
CCCCGCCATTTTTTTTAACGGGTGATCCACAACGTGGGCCAGGCGTCTGGCCCATGCCAG
TTATCGCAGGTGGGTTCTGCGGCGTAACGCACCAGGCGAAAACGCTGACCGTCAAAGCGC
CAGCGCGCCTGAATGCCACAATCGCTTAATCCGCGCCCTTTTGCTAAGGTCACCAGTTCA
CGCGATTTTTCATCGAATGTTGCGTTCATCAGTTCCAGTTCATTGGTCTCCTGACCGTTG
TTGAACGGCAAACGCAACCGTACCGGGCGCGAGGCCAGCGGCTTTTTACGCGACACAATC
CATGCCAAATCAATGGTGTTATAGGCCCCTGCCTCACAGCTAATCATCATCAGCGCTTTA
TCATCGGTCAGCGCAGTGACATTCACCTCACGACGTAACGGATCAAGCGAACAGCGCAGA
CCATTCATCCGCCAGTTTCCATAATCCAGCAAATCGTTACGTTCTTCGAGTGAAAGTGGC
GTCGGCGTTGGGTTAACCACCGCGACCTCTTTCAGCGCAGGCGCTGGCGGTACGCTGAGC
GGCGGTTCGTCCCCTTTCTTTATCCACGCGGTCTCACTGCCAACGCGCTTTTGCTGGGCA
TCAATAAACAACAACGCCGCTTTTAAGCCACTCAGAGAAATAGTCTGATTGCCGTCGCGT
AAGGTGATCGCCCTCCCTTCCTGAATCATCTGCAAAAACGCGGTGATGGTTGCCGTATCA
TCGGTTACTAGTAACCATGGTGAAATCCGCCACTTGTCACCACTTAACGCCAACGGCTCA
CCATCTAACAGCAGCCGTGGCGCTATCTCCCCTTCAGACGCATCCGGCGACTTCAACCCG
CCGCGCTCAATACGTAAAACGGCATCGGTATGCGCCCCGGCGCTGCGGCTCAGGGTCATC
ACCAGTCCATTATGATCGCCCGTATTGCGCGCTACACAGAAATTTTGGTTATTACAGGTA
ACCTGCCAGTCGGAAAACGCCCGTTGCGCTGGTGCCGCCCACACCAAAGACGTCGGCAAC
AAAGCGAAAAAAGAGAAGGAAAATGCGATAGCGCATGGACGGTACGCCCCCAGAAGTTCA
AACAAACAGCACAAGTCGTATCTTCGTTGCGCAGGTAGCGCGGCTCAATCGGATTTATCG
GATTGAGCCAATAATAAACAACGAAATATTATTGTTATTTTTCAGTCCATTAAATGTGAC
ATTTGCAAATAGTTAAGCAATAACACCGTCTTACCGTCACGTATCTCGCCGGTTTTAATC
ATCTCCAGCGCCTGGCTGAACGGCAGCTCAAGCACTTCAATATCTTCATCTTCGACACCA
CCACCGGCGTTAGCGCGCTGGCTGTCACTGTATTCGGCGATAAAAAAGTGGATTAGCTCA
GTCACACCGCCTGGCGACATATACAGTTCAAATAATTTGCGGACTTCGCCAACTTCATAG
CCCGTCTCTTCAATCGCTTCTTTGCGAATGCACACTTCCGGTTCGTCGTTATCCAGCAGC
CCGGCGCAGGTTTCAATCAGTTGCCCGCTTTCATTGCCATTAACCCAGGTAGCGACGCGG
AACTGGCGAATCAGAACCACGGTCTTTTTCTTCGCGTTGTACAGGAGGATCGTCGCACCA
TTACCGCGATCGTAAACTTCACGTTTATGGCGGATAACTTCGCCATCTTTGCGCGTGAGA
TCGTAAGTAATGTTGTGCAGGGTGAAATAGTTATCGGAGAGAATTTTGTCTTTAACGAGG
GTGATTTGTTGCGTCATACCGACTCCACAGCGCGAAATGAACAATTATCTTACGCTGTGA
AGTCGGGTTTGTCTGCGCAGGCTATCAGTGAGATTTGACTGATTTTACGCCCAGCCAGTC
AATGATCCCCTGTGCCGCATGACGTCCTTCTGCCATTGCGGTAACCACCAGATCCGCACC
ACGCACGGCGTCACCACCGGCGAAGATTTTCGGATTCGTGGTCTGGTAACGGTACTGGCT
TTCCACATCCGCGATGATGCGGCCCCATTTGTCTACCGTTACACCGTGCGACTCCAGCCA
CGGCATCCCGTGCGGATTGAAGCCAAACGCCATAATCACCGCATCGGCTGGCATGACAAA
TTCACTGCCTTCCACCGGCACTGGACGCCGACGCCCCTGGGCATCCGGCTCGCCAAGACG
CGTGCGCAGAAAACGAATCCCGCAGACGTGACCTTGTTCATTCAGCTCAAGCGCCACCGG
CTGGACGTTAAATTCGAAGTTGGCCCCCTCTTCACGGGCGTTCTTCACCTCTTTCTTCGA
GCCTGGCATGTTAGCTTCATCACGACGATAAGCGCAGGTGACATTACTCGCGCCGTGGCG
CAGCGCGGTACGCACACAGTCCATCGCGGTGTCGCCGCCGCCCAGTACCACGACGTTAAG
TCCGGCGGTATTGATAAACGGCTCTTCCGGTAGCTCTTCGAGTCCCATCACCTGTTTAGT
ATTGGCGATGAGGAACGGCAGCGCGTCATAAACGCCCGGCGCATCTTCATTGGGTAAACC
CGCTTTCATGGAACGGTAAGTGCCTACGCCAACGAAGACCGCGTCGTATTGTTCCAAAAG
CGAATTCAAAGAGACATCTTTACCCACTTCACAATTGAGTTCGAAGTGAATCCCCATCGC
GCTGAAGATTTCCCGACGGCGTGCCAGCAGGGATTTATCCAGTTTGAAAGAAGGAATGCC
GAAAGTGAGCAAGCCACCGATTTCTGGATGGCGATCGTACACCGTCACCGCCACGCCATT
GCGGGTGAGAACATCTGCACAGGCCAGCCCTGCCGGACCCGCACCGATAATCGCCACCCG
CTTGTCCACTTTGGTGACATGGCTTAAGTCAGGACGCCAACCTTTCGCCAACGCCTGATC
TGAAATGTAGCGTTCAATGTTACCGATAGTTACTGCGCCGTGCTCATCGCGAATAGTACA
GGCACCTTCACACAAACGGTCTTGCGGGCAAACGCGTCCGGTAATTTCCGGCAGGGTGTT
GGTCTGGTGAGAAAGCTCGACGGCGGCGTCGATGTTTCCGGCTTTCACCAGTTCAATCCA
CTGCGGTATATGGTTATGCAGCGGGCAGGTCCATTCACAAACGCTGTGCTCGCCGCACTT
AAGGCAGCGCGAGGCTTCCCGTTGTGCCTGATCGGCACGGAATGGCAGATAAATTTCATC
AAAACCGGTTTTGCGCGCTTCAATCGCCAGTTTATCTGGCTCGCCACGCGCGGGCGTTGC
CTGCATTTGCTCGACTTTACTCATTACCGGCATTTCTTGCGCCGCGGTACTGGCATGCCA
CGGTTGTTGTTCCTGACGTGCGGTGCGCAAGCGGCGGGATTTCGCCATGCCGGAGAGTGC
GGCGTCAGTGACCAGTTGCAGCGCGTCCGCCGGGCAATTTTCGACACAGGCAGGACCGTT
TTCGCGCCCTGCACAAAGGTCGCATTTATGCGCCGTGGCTTTTACTTTTCCTACCGCAAC
GGGTGTCAGAACGATTTGCATCGTACCAAATGGACAGGCCACCACGCAGGATTTACAGCC
AATACACTTTTGCTGATTGACCTGAATGCTGTCATCAACGTGGCTGATTGCGCCATTAGG
GCAGCTACGGGCGCAGGGCGCATCTTCACAATGGTGACAGGTCACTGCACTACGTTGCTG
CTGATGTTTGATAACCGTAATTCGGGGATGAAAATGGTGTTGGCTCAGGACATGTTGCTC
GTCATTGTGAGCCATGACACAGGCGATTTCACAAGCATGACAACCCAGACATTGCTGACT
GTTGGCCATAATAAAACGATTCATAACGACCTTCTTTTTTGGTTGTAAAAACCTTATTCT
TTATATGAGTGTTGTTATTACCCGACTTACAGGGGAATCGGCAATGTTCATGTGCCCAGA
ATAAGTAACTATTTCGCTATAAACTGTGGCAGATCAAATAATCCCATCACTGACTAAATT
TCGTTTCAGCGAACTGGAACATTAATGATTTTTTGTGGAGAAGACGCGTGTGATTGTTAA
ACGACCCGTCTCGGCCAGTCTGGCCCGGGCCTTTTTTTACATTGTGCTGCTGTCGATTCT
TTCCACGGGTATCGCTCTGCTAACGCTGGCGAGCAGTTTACGCGACGCTGAGGCTATCAA
TATTGCCGGATCGCTGCGTATGCAGAGTTACCGCCTGGGCTACGACTTGCAAAGTGGCAG
TCCACAACTCAATGCACATCGCCAGTTATTTCAGCAGGCACTGCATTCACCGGTATTAAC
CAATCTCAACGTCTGGTATGTGCCAGAGGCAGTAAAAACCCGCTATGCGCATCTGAATGC
CAACTGGCTGGAGATGAATAATCGGCTCAGCAAGGGCGACTTGCCGTGGTATCAGGCCAA
TATTAATAATTATGTTAATCAGATAGACCTGTTCGTGCTGGCTTTACAGCACTACGCTGA
ACGCAAAATGCTGCTGGTGGTGGCAATTTCCCTGGCTGGCGGCATCGGTATTTTCACGCT
GGTCTTTTTACTTTGCGCCGCATACGCCATCAGGTGGTTGCCCCGCTGAATCAGCTGGTT
ACCGCCAGTCAGCGTATTGAACACGGGCAGTTCGACTCGCCGCCGCTGGATACCAGCCTG
CCGAATGAGCTTGGCCTGCTTGCAAAAACCTTTAACCAGATGTCGAGCGAGCTGCATAAA
TTGTACCGTTCGCTGGAGGCGTCAGTAGAAGAAAAGACCCGCGATCTCCACGAGGCCAAG
CGTCGTCTGGAGGTGTTGTATCAGTGTTCGCAGGCGCTAAACACCAGCCAGATTGATGTG
CATTGTTTCCGCCATATTTTGCAGATTGTTCGCGACAATGAAGCGGCTGAATATCTGGAG
TTAAATGTCGGTGACAACTGGCGGATTAGCGAAGGGCAGCCAAACCCGGAATTGCCGATG
CAGATTTTACCGGTCACCATGCAAGAGACGGTTTACGGCGAACTGCACTGGCAAAATAGT
CACGTTTCATCATCAGAACCGCTGCTTAACAGCGTTTCGTCGATGCTGGGACGCGGTTTG
TACTTTAATCAGGCGCAGAAGCATTTTCAGCAGTTATTGTTGATGGAAGAACGTGCGACC
ATCGCCCGCGAATTGCACGACTCGCTGGCTCAGGTACTTTCTTACTTACGTATCCAGTTG
ACGTTACTGAAGCGTTCGATACCGGAAGATAATGCCACCGCACAAAGTATCATGGCCGAT
TTTTCCCAGGCGTTGAATGATGCTTATCGGCAGTTACGCGAGCTGTTAACTACTTTCCGC
CTGACGCTGCAGCAGGCGGATCTCCCCTCCGCGTTGAGGGAAATGCTGGATACGTTACAA
AATCAAACCAGCGCCAAACTGACCCTCGACTGCCGTCTGCCAACCCTGGCGCTGGATGCG
CAAATGCAGGTGCATTTGTTGCAAATTATTCGCGAAGCGGTGCTGAATGCGATGAAGCAC
GCCAACGCCAGCGAAATCGCCGTTAGCTGCGTCACCGCGCCGGATGGCAATCACACAGTC
TATATTCGCGACAACGGGATTGGCATCGGTGAACCGAAAGAACCCGAAGGCCATTATGGT
CTGAATATCATGCGCGAACGCGCGGAAAGATTGGGTGGGACGCTGACTTTTTCACAACCT
TCCGGCGGCGGCACGTTAGTAAGTATTAGCTTTCGCTCTGCGGAGGGTGAGGAAAGTCAG
CTTATTTGGCATCCATGCTCGAAATAAGCCGACTTTAAATAAGGCTCTACAACACAAGCC
TGATACATTTACTTACCCGACGGCGAAACAGCACCGGGTAAGTCCTCTGTATTTTACCAA
CTGTAACGCAAGTTCAGACTGCCATTAAGATCGTTGTAGTTATGGCTTCCCGTCTCACCA
ACAACCTGGCCAGTAATACTCCACTGGCTGTCCAGGTTCACCTGTATCCCTACTTTCGCC
TGCACCCGGTTAGACGGGATACCCTGTTTCGTCTCAGCGTCATCAAATGACACAGCAACA
TCACCGCTGGTGTACAACCAGTTCACTTCAGCAAACGGCTGAATAATGGAGGTTTTATTC
TTGTGCAGTTTGCCATCAACACGCAGCCCTAACCGGGTATTCCAGTTGTCGCTGTCCTGG
CCGCTGATGCGGGTACCATTATTGTCCGTAACACTGTCGGCGCTGTAACGCTGCCAGACG
ACCTGTGCCTGTGGCGTCAGGCTGAGCGTGTGTTGATTTTCCAGTGCAATATCGTAACGG
TAGCCGCCTTCCAGTGATGCTGCCTGTGCCGTAGAATCATAGCTTTCTGACCCCTCACTG
CCATTTTGCACACTGTTGTTATAGAAGCCATACTGATACCAGCTGTCTACATACAACCCG
CGATGATGTTGCGCATCGGCAAACCATGTGGCATATATGCCGAGGTTGTAGCCACCGACG
TTACCGCTTGCCGAGAATTGGCTACCGTCCGCACCCCTGTTGCTGGTACTGTCGGTGTCG
GCATTGACGTAACTCGCCATCCCCCCGGCTTTCAGACTCTGCACACCGTTGCCCCACGTC
AGAATGTCGCCGCCTAGTTGGATTTGCGAATAGTTGTTGTTGATATCAACATTGCCGTCA
GCCGCCTGAGACGCTGCATTCCCCGCCTTAAAACGCATCCAGACACTGCCATCTTCATTA
TGGTACTGACTACCTTCGCGGTCGTACAACGTCTGCATTTGCAGGTTACGCACCATCCAC
TGATTGCCGAGGTAAGCGCCGATATCAGGGCGATATTGCGGCGTCACCGGGGTATCATCT
GTGCCACTACAATCACCATCATCCGGTTCAGGCGGAACGCTGGATTGCGAACGTAAATAC
CAGTCGCCACCGTCTTCATAGAGACGATATTCGTACAATCCAATCTGCACCCGATTTCCC
TGCTCAAATGTTCCGGATGACTGACCGCCAACGTCGATCACTTCTATACCATTTTTCGTC
TGTGCACCTTTACCATTGACGTTAGCAACATAGACCATCGTGTTACCAGAAGTATCGCCA
GAGATGACCAGTTTATCGGTTGGAGAACTGTCATCACCCAGTTGACTGTTGATGTTAATC
TGGCTTCCGTTATCGCCGTGATAGTTGCCGTTGATGGTCAGTGTGTTGCCCGTTTCACCT
CCATGGCTCATGGCAATATTGCCACTGTTGTAGACATCGCCATTCACCACGCCGCTGCCG
CCGAAGGTAGCTCCCTCCGCAACATTCACCGCCTGGGTACTGCCAGATGCACCAATCACC
CCGCTGTCCGTCAGCCACAACGTTCCATCATTCACACGGGTATCCCCGCTCCAGGTGTTG
GCAACATTAAGGGTAAGTGTGCCGTCGCCCGCTTTAGTCAGGGTTTTGCCATCCCAGCCA
GTGACGCTATTCGGGTTAACATCGACCAGTTCGGTATTGAGGGTAAAGTTCTCATTCGGG
TCGCTGAGAGTGAAGGTGCCGTGGGCATCGGTAGCGGCAAGTTTTTCATCCGCATACCAG
GACAGTGAAGTGGTCAGTTCGTACTGTGTGTCATCCGCAGAGTTAACATGACTGTCCACC
GTCAGGAAGTCGACTTTTCTTGCCTCCATTCCGGCGACGGTCAACGTGTCAAAATCGCCG
TTGATGGCGTTATCAGCATCAATCAGAGTAAATGCATAAGGATCGTGGGTCAGCGGGTTG
TTGATGTTACCAATACCCGTAATGTTGAGCGTCCCGCCCAGCGAGGCGTCATGAGCGGTA
ATGATCGGACTGCTGGCATCCGTCCCAAGATTGATACTCAGGACACTGCCATCCTGCTGA
TCCAGTATACCAGTAGCAAGTGTTGCACCGGCAGCCAGTGAAGTGGTACCGCCATCAAAC
GTGGTGATATTGGTCAGCGTATACTGCCCCGCAGCATTCAGATTCAACGTAGCGTAGTTT
GCCACATCACCGATCCCCAGCGCGCCAGTATGATCAGCATTGAGCGTACCCGCTTCAATA
CCCGTGCCGCCGCTGTAGGTGTTGGCGTGAGCAACCGTAATGGTGTTGGCATCTTCTTTC
ACCACCTTACCCACATAACTGCCCACTATTGTGTCACCGTCATATGTATTGTAGTCGCTA
ATCACATTACCACTGTTCAGCGTCCAGTCCTCTGCACCGCGCAGCGTCAGGGTTCCGCCA
TTGATAATATTACCCGCCCCCAGCGCTGATGCATCCGCCACAGCCAGATCCGCATCCATA
TCCTTATTCGCACCAATAATCCAGGTACCATTAAAGCTGTCATTGTCACCGCTGACGGTA
AGATCCCACACGGTACTGACTTCCCCGCTACCACTGAGGCTGTTGCTCAGGTCTCCCCCA
GCTGGCGAAAAAATACTCAGCAGCCCGTCAACCACGATATCCCCGCGGCCAAGGTTGGTC
GTCTCGCTAATTACCTGGGCGCCTTGTTCTATGTTGATGGTTGCGCTCAGACCACTGAGA
TCGCTGGTCGATCTAATATTGAGTTCACTGTATAAATTCAGCAAACCACTGCCGGTAACG
ATCCCCTCAAAAAAGGAGACCCATCTATATCGAGAACCATGTCCGATCGTCAACTCACCA
CCGTCCAGATCAAGCATACTGCCCACACCCACAGATACAGAATCAAAGCTCTGACTCTCA
CCGTTCAGAATGTAAGCATTGCCACTTTCCAGTTCCAGCACATTATCCACTTGAGCTTTC
AGGCTCGCCCCCTTATCGAGGGGGCTGCCGCTGTAGGCAGAGATCGCCATGCCGCTACTG
TAACTATGTTGTCTGTCAGAAGCGTCTACCGTTTCCCCGGTAACCATTGCATTCGTCACC
TCAGATGTGGATTCCGCCTGCGCACTGAGCGGGCTTAACGCCAGGAGCACCATCGCGGCC
ACCGACCGCACCTGGGTTTTCATCCGACTGTCGCCGCGCGAGAGTTCGGAAGCAACGACG
TACATATTACGCGCGGCATTCCAGACAATGTTGTAAGTTCTGTTCATGAATTAGTCCTTT
AAGATTAAGAGCGCGTGTTCCTCGCTCAGGCTGTGATGCAATTGATGAATAATGCGGATG
ACCTGCTGACCGGTGATCAGCCGGGAGCACTCATACTGCCGCTCAGTACCTTTGTGCCTG
GGACATTGCAGAAAATCCTGGTGATCAAAATCGATGCGCATATCGTCCCAGCAACCATGG
CAGCCATAAGAATTGAATACGCGCCACGGTGTATAGAACTCACTTAGAGGATTGGTAAAC
CCACTAATCAACACCAGCGGGATGTGACAACTCCACGCTAACCAACTCAAGCCGCTGCTC
AGGCCAACAAAAAAGGCCGCATGGCGAAGCAAATCCACCCGTTGCTGTAGCGGCAGCGCG
CCAGTGAAATCCTCTGCGCCGTTCGGGATGTGATTCCAGACAAAACCATAACCATGGTGC
GCCTCTTTATCGATGCACAGCACTCGGTAGCCCAGCGTTTTCAGTTCAGAAATTACCTGC
GACCAGCCATAGCCGTTGTTCCAGTATTTCGCCTGGCAGGAAGACTGAACGGCGATACAA
ACGTAGGGTTCGTCAATGCTGCGCACAGCATCAAGTTTCAGTAACGGCGGCTCTTCATGC
GGCAAAATTCCCAGGATATAAGCAGCGATACGACTAAAGCCAACCTGGCGGAAATCCACC
GGTTGATGAGTATCATTGCCTTTGAAAAACAGTCCGATGCGGTAGCTGGCGTAGGGGCTG
TGGGTTTGAATGCTTTCACGAGTGGAAAAAGTGATTTGCGGATACTGGTCGCGTAGCAGT
TCAATGATTTCCTCTGCCATCACACATTCCAACTGACACTGATGCTTCTGGCGGAAACGT
TCAGCATAGGGAAACCAACCAAGGAGCTCCTCCAAAGTGCCGATGGGAAAGTGGATAATG
ACAGTTTTATCACGCAGATCCTGAACTACGTCCAGCACAGGTGTCGTTTCACCGTCTTTA
AATACCTGGATGCGAAAGTTGATGAAGTACTTTTTATTACTCATCACACAGCCTTGATCA
GTCTCACAGGTCAGTAATATATTGCCGGAGTCGTCATCAATTAAATTTACCTGCCACTGA
CCAGGGCCAAGTTTAACGCGGGCTCCGTCATTAAAATCAAAACGAATACCATGCAACGCT
TTTTGGGTAGGAATAAAAGGGCGTGTAGAGAACAACAGAGGTGTTTGTCCGTCTATTATG
TTTGGCAGTGTGTCATTATTACTCACTGTAAAGCTCCTTTTTATCGAATTAGTAAGGCAT
CATGTTAGGCGATAAACTAATATCACTGACGATCTCCAAAAAAATAACCAATCACTATGA
AAATTATTTTCACAAGCTCTACTAAATTTAGCGCTGTAATTAACCCAATACTTTCACAAA
CAATGAAAATATCGAAAACCAGTTATGGAGGGCTCCCCTCCTTTGCGGCATGCTGTAAGT
GTTTAAATCACTGCAACTTATTCATCGTGTTTATACATCCATCATGGAATATAAATAGCG
CTAAACGTATTCATAAAAATAATATTCAAGCAATTAATATTGTTTTTATGGATACCTTCT
TCGCCTACAACCGCTCCACGACTTCAATTTTTTACTGAATTAAAAATAATATTTTTAGTA
TATTCGCAGAATATCTGCTCAAAGTAATATTATTTTTATAGATTAATAATTCAAATTCTA
TCTATTAAACAATTTAATGATTTCGCGAATGTTTTGCGAAATAATTAATAAAAATATTTT
TACAATATCTCACTTGGTATTTTAGGGTAATTTAAAGCCAATACGCCAATTAAATGTAAA
TAAAAAGCATAAAATAATGAGCATATGATTTTTTGATATAAAAATTAAAAAAAACACACT
ATTACAAACATTTTATATTCTGTATTGTTACATTGTGACTGAGCACACAATATCTCCACG
CCTTATTATTGCTGTCTCTCCTGATAGTTTGTAGCCATAGTGGATGCGGCCTATCAAAGA
AACTCAGTTAATATTATTAAGGAAGCCAACTCATCTTTAGCCACAAAGCGCATGACAAGC
AGGAAGAGTATATCTATAGATATCTCTTCAGAAAAAAATAATGGTTATGAGGCTAATGAA
CAAAACAAAATGGCCTGATTCGCTACATTTATCGTCTAAAGAGTGAAAACTACTAAACAA
ATCAATAGAATATAACCAATAACATAAAATGCATGGCATATGAGGGAACAATTTTGCTAT
TTTCATGCTGCATGTTTCGATAGCAACACATTTCGTAGATTTACATTAACTCCTTTTTTC
TCCACGATTGGCTCGTACCTTGCCGCTACAGTGAAGCAAGTCAAGCCTACAACGATACGC
AGAAACACGAGGTCCTCTTTTAATGGCGAATTTCTTTATTGATCGCCCCATTTTTGCCTG
GGTGCTGGCAATCCTGTTGTGTCTGACAGGTACCCTGGCGATTTTTTCATTGCCCGTTGA
ACAATACCCCGATCTCGCGCCACCGAATGTGCGAGTGACCGCTAACTATCCCGGCGCATC
GGCCCAGACGCTGGAAAATACCGTGACCCAGGTTATCGAGCAAAATATGACCGGCCTCGA
TAATCTGATGTATATGTCATCTCAGAGCAGCGGCACCGGTCAGGCATCTGTCACGTTAAG
TTTTAAAGCAGGCACCGATCCGGACGAAGCCGTGCAGCAAGTACAAAACCAGCTACAATC
AGCCATGCGAAAGTTACCGCAGGCGGTGCAAAATCAGGGCGTGACGGTGCGTAAAACCGG
CGATACCAACATTCTGACCATTGCCTTCGTCTCTACCGATGGTTCGATGGATAAACAGGA
TATTGCCGATTATGTTGCCAGTAATATTCAGGACCCGTTAAGCCGCGTGAATGGCGTCGG
GGATATCGATGCCTATGGTTCGCAATATTCCATGCGTATCTGGCTGGACCCGGCGAAACT
CAACAGTTTCCAGATGACGGCTAAAGATGTCACCGATGCCATTGAATCACAGAACGCGCA
GATTGCGGTTGGGCAACTTGGTGGTACGCCTTCCGTCGATAAGCAGGCGCTCAACGCCAC
CATTAACGCCCAGTCACTGCTGCAAACACCAGAACAGTTCCGCGATATCACCTTGCGGGT
GAATCAGGACGGCTCAGAGGTAAGGCTGGGCGATGTCGCCACCGTCGAAATGGGGGCGGA
GAAATACGATTATCTTAGCCGCTTCAATGGTAAGCCAGCCTCCGGGCTGGGGGTTAAACT
GGCCTCCGGCGCGAACGAAATGGCGACAGCGGAGCTGGTGCTCAATCGTCTCGACGAGCT
GGCGCAGTATTTTCCACACGGACTGGAATACAAGGTGGCGTATGAAACCACCTCGTTTGT
TAAAGCCTCCATTGAAGACGTGGTGAAAACGCTTCTGGAAGCTATCGCCCTGGTTTTCCT
CGTTATGTATCTGTTCCTGCAAAACTTCCGCGCCACGCTGATACCCACTATCGCCGTGCC
GGTGGTGTTGATGGGAACCTTCTCCGTGCTTTACGCCTTCGGTTACAGTGTCAACACCTT
AACCATGTTCGCGATGGTGCTGGCGATCGGTCTGCTGGTGGATGATGCCATCGTGGTGGT
GGAAAACGTCGAACGTATTATGAGTGAGGAAGGACTCACTCCTCGCGAAGCCACACGTAA
ATCGATGGGGCAGATCCAGGGGGCACTGGTCGGGATTGCGATGGTGCTTTCGGCGGTATT
TGTGCCAATGGCCTTCTTCGGCGGCACCACCGGTGCCATCTATCGCCAGTTCTCTATTAC
CATTGTTGCGGCGATGGTGCTGTCAGTACTGGTAGCGATGATCCTCACTCCGGCTCTGTG
TGCCACGCTACTTAAGCCACTGAAAAAAGGTGAGCATCACGGGCAAAAAGGCTTTTTTGC
CTGGTTTAACCAGATGTTTAACCGCAACGCCGAACGCTACGAAAAAGGGGTGGCGAAAAT
TCTCCACCGTAGCCTGCGCTGGATTGTGATTTATGTCCTGCTGCTTGGCGGCATGGTGTT
CCTGTTCCTGCGTTTGCCGACGTCGTTCTTACCGCTGGAAGACCGTGGCATGTTTACTAC
CTCGGTACAGTTGCCCAGCGGTTCAACCCAGCAACAGACCCTGAAAGTCGTTGAGCAAAT
CGAGAAATATTACTTCACCCATGAAAAAGACAACATCATGTCGGTGTTTGCCACCGTGGG
TTCTGGCCCTGGGGGTAACGGGCAAAACGTGGCGCGAATGTTTATCCGCCTGAAAGACTG
GAGCGAACGCGACAGTAAGACCGGCACCTCGTTTGCCATTATCGAGCGTGCAACGAAGGC
GTTTAACAAGATTAAAGAAGCTCGCGTTATCGCCAGCAGCCCGCCAGCAATTAGCGGTCT
TGGTAGTTCTGCGGGTTTTGATATGGAGTTGCAGGACCACGCTGGAGCGGGTCACGATGC
GCTGATGGCAGCACGAAACCAGTTGCTGGCGCTGGCAGCGGAAAACCCGGAGCTAACCCG
TGTGCGCCATAACGGCCTCGACGACAGTCCGCAGTTGCAGATTGATATCGACCAGCGTAA
AGCTCAGGCGCTGGGCGTTGCTATCGACGATATTAACGACACACTGCAAACCGCCTGGGG
TTCGAGCTATGTGAATGACTTTATGGATCGCGGTCGCGTGAAGAAAGTCTATGTGCAGGC
AGCTGCGCCGTATCGCATGCTGCCAGATGACATCAATCTCTGGTATGTCCGAAATAAAGA
TGGCGGCATGGTGCCCTTCTCTGCTTTCGCGACCTCACGCTGGGAGACAGGCTCGCCGCG
TCTGGAACGCTATAACGGTTATTCTGCGGTTGAGATTGTTGGGGAAGCCGCACCGGGGGT
CAGTACCGGTACGGCGATGGATATTATGGAATCGTTAGTGAAGCAGCTGCCAAACGGCTT
TGGTCTGGAGTGGACGGCGATGTCGTATCAGGAGCGGCTTTCCGGCGCGCAGGCTCCGGC
GCTGTACGCCATTTCCTTGCTGGTGGTATTCCTGTGTCTGGCGGCATTGTATGAAAGCTG
GTCGGTGCCGTTCTCGGTAATGCTGGTCGTGCCGCTGGGGGTTATCGGCGCGCTGCTGGC
AACCTGGATGCGCGGGCTGGAAAACGATGTTTACTTCCAGGTGGGTCTGTTAACGGTCAT
TGGTTTATCGGCGAAAAACGCTATCCTGATCGTCGAGTTTGCTAACGAGATGAACCAAAA
AGGCCACGACCTGTTTGAAGCGACGCTCCACGCCTGCCGTCAGCGTTTACGCCCGATTCT
GATGACCTCGCTGGCATTTATCTTCGGCGTATTGCCAATGGCAACCAGCACAGGTGCCGG
TTCCGGTGGTCTGCATGCGGTGGGTACTGGCGTAATGGGCGGGATGATTTCGGCCACTAT
TCTGGCTATTTACTTCGTGCCGCTGTTCTTTGTGCTGGTGCGCCGCCGCTTCCCGCTGAA
GCCGCGCCCGGAATAAGCAATAAAAAAGGCGACATGCCAATGTGTCGCCCTTTTCAACTT
TCCGATTAAGAACCTGCTCAGCGGGTTCTTGCTGTTTGTACTTTGTCTCAGGAATTACTT
ACGAAGCATAACTTCGATAAAGTCTTTCCAGTTCCCCAGTTCACGTTCAATCATAACAAC
CTCTCTTATAATTATGGGTATTCTACGGAAACAATATACCGTGGTGAAGCTAATTTACTC
GATTGCTGTGATGACTACCTCCGGGGGACAAACCTTATGTAAATACTATGGTCCTGCGGT
GATGATTTGTATGTGATGCACCGCAACATTTCGAGATATTCATACGGCATCTAATACTGA
TTTAATTCTGGTTAAAATACAGACAGATAACAAGATGAATATTCTTAATGTTTACGTTAA
AAATGTTTAATGTTATTTAATGGTTGTTAATTTGAATACTTCGATAATGTTATATTTCCT
GATAATCATTTGCAGGCAAAATGTTTTCACCTTTAAATGAGTATTTATTCTCATAAATCG
AAAAAGGATTCATTATGGTTACACTTTACGGCATCAAAAATTGTGACACCATTAAGAAGG
CTCGCCGTTGGCTGGAAGCTAATAACATCGACTATCGTTTTCATGATTACCGCGTCGATG
GATTGGACAGCGAATTATTGAACGGTTTTATCAACGAATTAGGCTGGGAAGCGTTACTCA
ACACCCGTGGTACAACCTGGCGTAAACTGGACGAAACCACCCGCAATAAAATCACCGATG
CGGCCTCTGCGGCGACATTAATGACTGAAATGCCTGCAATTATCAAACGTCCATTGCTCT
GCGCGCCTGGTAAGCCTATGCTGCTGGGTTTCAGTGAATCCAGTTATCAGCAATTTTTCC
ATGAGGTGTAGTCTATGTCGTGCCCGGTTATTGAGCTGACACAACAGCTTATTCGCCGCC
CTTCCCTGAGTCCTGATGACGCAGGATGCCAGGCTTTGTTGATTGAACGTTTGCAGGCGA
TCGGTTTTACCGTTGAACGCATGGACTTTGCCGACACGCAGAATTTTTGGGCATGGCGTG
GGCAGGGTGAAACGTTAGCCTTTGCCGGGCATACCGACGTGGTGCCGCCTGGCGACGCCG
ACCGTTGGATCAATCCGCCGTTTGAACCCACCATTCGTGATGGCATGTTATTCGGGCGCG
GTGCGGCAGATATGAAAGGCTCGCTGGCGGCGATGGTGGTAGCGGCAGAACGCTTTGTCG
CACAACATCCCAACCATACGGGACGACTGGCATTTCTGATCACCTCTGATGAAGAAGCCA
GTGCCCACAACGGTACGGTAAAAGTCGTCGAAGCGTTAATGGCGCGTAATGAGCGTCTCG
ATTACTGCCTGGTCGGCGAACCGTCGAGTATCGAAGTGGTTGGTGATGTGGTGAAAAATG
GTCGTCGCGGATCGTTAACCTGTAACCTTACTATTCATGGCGTGCAGGGGCATGTTGCCT
ACCCACATCTGGCTGACAATCCGGTACATCGCGCAGCACCTTTCCTTAATGAATTAGTGG
CTATTGAGTGGGATCAGGGCAATGAATTCTTCCCGGCGACCAGTATGCAGATTGCCAATA
TTCAGGCGGGAACGGGCAGTAACAACGTTATTCCGGGTGAACTGTTTGTGCAGTTTAACT
TCCGCTTCAGCACCGAACTGACTGATGAGATGATCAAAGCGCAGGTACTTGCCCTGCTTG
AAAAACATCAACTGCGCTATACGGTGGATTGGTGGCTTTCCGGGCAGCCATTTTTGACCG
CGCGCGGTAAACTGGTGGATGCGGTCGTTAACGCGGTTGAGCACTATAATGAAATTAAAC
CGCAGCTACTGACCACAGGCGGAACGTCCGACGGGCGCTTTATTGCCCGCATGGGGGCGC
AGGTGGTGGAACTCGGGCCGGTCAATGCCACGATTCATAAAATTAATGAATGTGTGAACG
CTGCCGACCTGCAGCTACTTGCCCGTATGTATCAACGTATCATGGAACAGCTCGTCGCCT
GATGAGTGGTTCTGCAAGAGGAAATAAGCATGGACTGGCTGGCTAAATATTGGTGGATTC
TGGTGATTGTCTTTTTGGTAGGCGTCCTGCTGAACGTGATTAAAGATCTCAAGCGCGTCG
ACCATAAGAAATTTCTCGCCAACAAGCCGGAGCTTCCCCCGCATCGTGATTTCAACGATA
AATGGGACGATGACGACGACTGGCCGAAAAAGGATCAACCGAAGAAGTAAGCTAAGTGGC
CGGATAAGGCGTTAACGCCGCATCCGGCCATGATGCCTGATACGGTCTTATCAGGCCTAC
CCGGCTATTATTACATCATTTCAATCACATCATCATCGCCAGGCTTACCGCCGCTTAGCG
CTTCGTCGAAATAATGTTTCGGAATGGTATAACGCAAGTGATCCAGGGCTAATTGCATAC
TGCGATTGTCGATCGCATGGCCTAAATCCTCCACGATATCCAGCGTCACATCGCCACCGG
CACTGATTAACGCTTCCTGCGCCGCAACCGCATGCGCCAGATCGATAACCGGATCTTCAC
CGCCATGAATCAAGTGAATTGTTGTGGCTGTAGACGCGGTTTCCGGCAGGCTCGCGTAGC
GTCCGTTGAAGGCAATGACGCGCGAAGCAAGGCCCGGTTCGGCTTTAATGCTCTCCAGCG
CCATAATCGCGCCTTGTGAGAAACCGATTAGCGCCGTGGCATTAGCCCCTACTCCGCTTT
GTTTCTGCCAGTAGCGCACCGTCTCAATAAACGTCGGCATGATAGCATCCACACGCGCCT
GGCGATTATCTTCCGTAATACCCTGCACCGAAAACCACTGACGCCCCGCCGGATTACCGC
TCGGCTCCGCGCCACCGACACTCACCACCAGCGCATCAGGAAACAGCGGCGCAAACCAGC
TGCCTATTTCCCCCATTGCCACCGGGTTATCCCCGACACCGTGGAAAAGCAGTAACAACT
GTTGTGCTGGTTTATCCGGGCTTTGAACAACAAAATGGTCATGTTTCATGGCGAACTCCT
TAACTGATGTCATTAATTTTACGCCGCTGACTCACAATGACCATGGGAGAAAATTGAAGG
AGTCAGTGAAAAAATTGCCATTGCGTTATGCGATCGCGCAGACGCTCAGTGCGAACATCA
TCAAGTGCGAATAGCGCCTGCGCGGCCTCTTCCCGCTGGCGAACCAGTAACAGCTTACGG
CCTGAAAGTTTAAGTGTGGTACATAACTGCGCGTCACTGGCGTTTTTCTGTAAACGCCCA
CGCAGCGCCGGTAATGCCAGTTCGCTGGTTTGTAACAGACGCATTAAGCAACCTAACGAC
GTTAATAGCGGACGATGAGCGAAAGCAAAACCGGCCAGTTCAAGCCAGTCGTCGTCAGAA
AGGACGGCATCGTTTAGTGGATCAACAGGAAGCATTTCGCCATTCCACTGCGCGAGAACT
TGCGCATCGCGACGTAAACGGTAATGCTCACGTTCAGCCAGCTGTTTACCCGCATCACTC
ATCGGTAACAGCGCCATCGCCGTATAGCAACCGCTGCTGGCTTCACGATGATTACCCATT
CGCACCAGCACAAAACCGCAGCGTTGCCAGAAACGCCATAATTCCCCGGTGTAACCAAAA
CTCACCGAAAGATAGTCGAGGTCCTGCGTATATTGCAAAGCACCAGCAATAAGTTGCCGC
CCTGTGCCTTCCCGCTGACGCGCCGGATGAACTGCTATCCGGCTGACCCGCCGTCCACGC
AATGTCGCTGCCAGTGGATTGCTGCCGTGCGCCGCCAGCGACTGGGCCACCAGATTACCC
CGTGGACGACGATAACCCGCCCATACCGCCTGACTGAGTTCTTGAGATAATCCACCCTCA
TCCACCAGCCACAGCGCTCCGGCAATCTCGTTTTCGCCAGCCGCCTGTAAAAAATGTTGA
CCTGGTGCATCCATCATGCGGCGTAAATCCAGCGGCGAAGTCCGGTAGTGCGCACCAGAC
AATAATTGATAAACCTTTAACGGCGTTTCTGGCTCGCTTCGCCATAACGTCTGTTCAAAT
GCGGAAATAACGATATTGCCTTGTGGTGTATGGGTGAAGTTTTCATCGTCAAACACCAGT
GCCTCACTAACCATTTTTTCCAGCGGGCATCCCTGCGCCCAACGGATCGGCTGTTGTAGT
TCAAAACGGTGTAAATGCGGAAAGCGAGCGCAAAATTTCAGCAAAAAACCACGTCCGGTG
CCTTCGTAGCCCTGCACCGTAGTGGTTAACAACGTTCGAGGAAAACGCGATACCAGTTGA
TGCAACAACGGCGCAGGTATAGCTGCGGCTTCATCGACCACCAGCCAATCGGCTTGCTCA
TCGCTGGCTAACAAGGCATCCGGTGCAATAAAGCGAAACTTCTCGCCCGCAAATTGTGCC
AGTACATCCGTTGCCGCTTTTGCGGGCGCGGTGACAATCGCACTGCCCGCAATACGAGAA
ATGAGTTGCCCTGCCAACGCCGACTTACCGCGCCCACGCGCAGCAGTTACCGCTGCCACG
CCCGGCGGCATGGTCAGTAGCTGCTGTAAGAGTTGCTGTTGTTCTGGTTGTGGTGCGCCG
GTAGCGGGGTGCCAGTCAGTACGGGGAGTAAAATGCGCCAACGAGAACGGCTGGTTTTGC
CGCCAGAGGATGGCGTCGTTATTCGCCGTAAGTACACGTTTGAGGTGCAGGACAAAATGC
GGCGTCGCAATAGGGTCAGGGCAATCACTCCAGCGCAGCGAGTCGGCATCAGGTTGGTTT
TCCCACTCATCCCATACAGGGAGTAACAACACCAGCCAGCTTCCCGCTTTCAACGTTCCG
CTAAGTGCCGCAAAGGCAGCGGCATCAAAGCCGTGGCGGGCGTCGAATACCGCATGCCGG
AACTCGCGCCCAAGTAAAGTTTGTAGTGCCGAGGGAGAACAGTGGTTTTCAGCATCTGGC
TGCGGCGAAATCCACAGCCAGTCGCCAGGTAAGGCATCACGCAACTTAAGCGCATGATCA
AAACACCAACGCTCTTCCCCGCTCAACACCAGCAAGCGGCGGATCCCTTCACGTTTCATT
TGCGCTGTTAATGTGTGAAGCGCAGTCAGTTCAGCCATCCCTGCCCCGGAAGTTAAATGC
TTTTACCAAAAGTATTGCATTGTGCCGGATCGCCGCTGTCGAAACCACGTTTAAACCAGC
TGTAGCGTTGCTGAGAAGTGCCATGAGTGAAACTGTCTGGTACTACTCGCCCCTGACTTT
GCTGTTGTAAACGGTCATCGCCGATGGCCTGCGCCGCGTTCAGCGCCTCTTCCAGATCGC
CAGTTTCCAGAACACCTTGCTGCTGCATACTATGCCCCCATACACCGGCAAAACAGTCGG
CCTGGAGTTCCATACGCACAGATAAGCGGTTTACTTCCGCCTGCGTCGCGTTTTGTTGCA
GTTGACGAACTTTCGGCTCGATGCCTAGCAGTTTCTGCACATGATGACCGACTTCATGAG
CGATAACGTACCCCTGGGCAAAATCGCCATCCGCGCCAAGTTTGTCTTTCATGTCATCAT
AGAAGGAGAGATCGATATAAACTGTGCCATCCGCCGGGCAATAGAATGGCCCCATAATGG
ACTGTCCCGCCCCGCAGCCGGTACGCGTCATTCCACGGTACATGACCAGCTTCGGTTGCT
GATAGGTTTTACCCATCTTCTCGAATTGCTGTCCCCAGGTGTCTTCCGTGGTTGCCAGAA
TCACCGAGGTGAATTTTGCGGCTTCGTCTTCATTAGGGCTAATTGACCGCGTTGATTGCT
GTTGGGAAACCGGCTGTCCGGTCATCAACCCGGTTAAATCAACGCCATAGTAGCCTGCAA
CCAGCACGACTATCAGTAAAATCAGCCCGCCTTTACCGCTTGGCAGGCGAAAACCGGGAC
CGCCCATAGACGGACCACCAGAGCTGTTGCGCCTGTCTTCAACATTGTCACTTTCACGTC
GCCCTTGCCAACGCATAGATACCTCAACATTATATTCATTATAGAAATGATCGTAGGTGG
TTCAGAGGAAGATTACCACAGGAAAGCGGGATGAAATGGCGGAGGAATGAGCGTTCAATG
CACATCTTATGAGAGCGGTTGTCTTGCCGTGCCAGCAGCACGGCAAGATGATGAACAGAA
AAATCAGTCCAGCTGTACACCCAGGCGGCGGGCAACGGCTTCATAGGCTTCGATCAGGCC
ACCGAGGCTCTGTCGGAAACGGTCTTTGTCCATTTTCTCCAGCGTTTCTTTGTCCCACAG
GCGGCTGCCGTCCGGGGAGAACTCATCGCCCAGAACCACTTCGCCTTTGTACAGACCAAA
CTCCAGCTTGAAGTCGACCAGAATCAGACCTGCATCATCGAACAGTTTTTTCAGCACGTC
GTTCGCTTTGTAGGTCAGCTCTTTCATACGCGCCAGATTCTCTTTGCTCACCCAGCCAAA
GGTTTCGCAGTAAGATTCGTTGACCATCGGATCGTGCATGGCGTCGTTTTTCAGGAACAG
ATCGAACAGTGGCGGGTTCAGCTCAATACCTTCTTCGATTCCAAGACGTTTCACCAGAGA
GCCAGCAGCACGGTTACGCACGACACACTCAACCGGCACCATATCCAGCTTTTTCACCAG
ACATTCGGTATCGGAGAGCAGACGCTCCATTTGAGTCGGGATACCCGCTTCAGCCAGTTT
GCTCATAATGAAGTAGTTGAACTTGTTGTTCACCATACCTTTGCGATCAAACTGCTCAAT
GCGCGCGCCATCCCCTGCTGACGTATCATTGCGGAATTCGAGCACCAACAGGTCCGGGTT
TTCCGTGCTGTATACGGTTTTCGCTTTACCACGATACAACTCAGCTTGCTTTTGCATCTT
TATCACTCCTGGGTGTGAATTAACGTTTTAAAATCTTTTGCTGTCTGGTGTGCCGGATGT
TTTGTCGGATGCGGCGTGAACGCCTTATCCGACCTACGTCCGACAAACAAATTTCGTGCG
AATTACCGCTAAAATCGCGTTTTTCTGTCGACGCACACGTTTGCGTATCATATCAGAAAA
AAGGGCCGGATGACTCCAGCCCTGTATTTTTACTTGCTAAACGCAGCCTGGAAGACAGCT
ACCAGCGCGTCGTTCTGACTCTGAGTCAGAGTATGACCTTTCGGATCGATGAACTGTAGG
CTGCTGCGGTTATCTAAATCGCCAACCTGCAGTTTATAGTCACCGGATGCCAGACCTGGA
TCGCTCGCGCCCAGTTCGTGCCATTCGCTGTCAGACAGCGGCTTATAAGTTACGGCCATG
TTGCCCTGCGAACGGGTGCTGTCGGTCACTTTCATGCCCACTTTTTCCAGCGCAGCTGGC
AGACGTTGCCAAACCACATTGAACGGCCCGCGTACGACCAGCATTGGTAAACCGGTGTCA
TCAGCTGCACTTTGTACGTCCATAGTGGTGGAGGCACGATTTTGCGCAGCGTTCGCGGCG
TCAGTGGCAGATTTATCCAGACCGGCGGAAATAACGTTCATCATCTCCGTGCTGTAACGC
TGCATAGAAGCCGCGTCTGCAACCGGTTTGCCCGCCTGTTCCAGGTTCAGCAGTTTAACC
GTAACCGCCTGCTGATAACCCTGCGGCTTAACAGAGATTTGATAACGACCACGATACTGC
TCGTCTTCGTCCAGACGGTTCCATTGTACCCAATCGGTGGTCAGTGTCTGACCAGCATCA
TCACGTTGGGTGATGGTGTAGTTTTTCGCCTGCAGCACGCTAACCACCTGCGGCCACAGA
GTATTACCACGACCATTTTCCACCAGCAATGAAGCGGTATCGCCCGTGAACTGGGTGCGC
GCGCCAGAAACCAGTGCCAGCGGCTGGGCTGGTGGACGAATGTCCAGCGCCTTACCGACG
GCACCACTACCGTTGGTCACCGGGATTGCATAATCGCCGGAGGTCACCGGCAAGATCATT
CCAGCCGGGGCATGAAGCTCCGCAAGCGGTGCCGCTTCCAGGTAGGCTTCATCACCACTG
ACCTGACGCTTATAGCGTGAGTCAGAACTACAGGCAGCGAGTAATAAAACAAGCGAAACA
CCCGCAACCTTTGCCAGGCGCGACTTTTGAACAGAGTAAGCCATCAAATCTCCCTAAACT
TTACAGCAAACCGGCATGCTTAAGCGCCGCTCTGACCGTCTCACGACCACTGTCGGTGAT
TGGTGTCATTGGCAGGCGCAGCGTATCGGTCGCCACAAGACCCAGTTCCTTACATGCCCA
TTTCACCGGGATTGGATTGGGTTCGACAAATAGTTTGTTGTGTAATGGCATCAGACGCTG
ATTAATAACGCGTGCCTCGGCAAAATGCCCTTCTGCTGCCAGTTTGCACATCTGGGCCAT
ATCACGCGCTGCGACGTTAGCCGTAACGGAAATAACCCCATGACCGCCTAATTGCATGAA
GTCCAGCGCGCTCGCATCATCGCCGCTCAGCAGAACAAAATCATCTGAAACCAGCTCTTT
GATCTGGTTTACACGCGTTAAGTTCCCTGTTGCCTCTTTGATTCCGATAATATTTTTTAC
TTTCGCCAGACGGCCCACCGTTTCCGGGAGCAGATCGCAGCCAGTACGGGACGGCACATT
ATACAGAATTTGCGGCAGGTCAGTATGTTCAGCGATGGCTTTGAAATGCTGATACAAACC
TTCTTGCGACGGACGATTGTAGTAAGGGGTTACCGTCAGGCAGCCGACGATACCGCTGTC
ATTGAAGCGCTGCGTCAGGCTAATGGCTTCCGCAGTAGCGTTAGCACCGGTCCCGGCAAT
CACCGGAATGCGCCCGTCAGCCAGCTCCAGCGTCATCATCACCACATCAGCATGTTCGTC
ATGATTTAAGGTAGCGGACTCGCCAGTGGTGCCAACAGAAACGATCGCCGAAGTACCGCT
GGCGACATGATAATCAATCAGTTTTTTCAAGCTAGCCCGACAGACATTACCTTTTTCATC
CATCGGAGTAACAATCGCGACAATACTTCCCGTGAACATGGGCCATCCTCTGTGCAAACA
AGTGTCTCAATGGTACGTTTGGTATGGCATTAAAAGCAAGCAGACAGAACCGTTCTGATT
GTTGTATGCATGTTTTTTTATGCTTTCCTTAAGAACAACTCACCCCTTGAAGGAATAACC
AGTTTGACACTGTCATCGCAACATTATCTGGTGATCACTGCGTTGGGTGCCGATCGCCCT
GGAATAGTGAACACCATCACCCGTCATGTCAGTAGTTGCGGCTGTAATATTGAAGACAGT
CGCCTGGCGATGCTGGGAGAAGAGTTCACGTTTATCATGCTGCTTTCCGGTTCATGGAAT
GCCATTACTCTGATTGAATCAACGTTACCGTTGAAAGGTGCCGAATTGGATCTTTTAATC
GTGATGAAACGGACAACAGCCCGTCCGCGTCCGCCCATGCCAGCATCGGTCTGGGTTCAG
GTCGATGTGGCCGACTCTCCGCATTTGATTGAACGCTTCACAGCACTTTTCGACGCGCAT
CATATGAACATTGCGGAGCTGGTGTCGCGCACGCAACCTGCTGAAAATGAACGGGCTGCG
CAGTTGCATATTCAGATAACTGCCCACAGCCCCGCATCTGCGGACGCAGCAAATATTGAG
CAAGCGTTCAAAGCCCTATGTACAGAACTCAATGCACAAGGCAGTATTAACGTCGTCAAT
TATTCCCAACATGATGAACAGGATGGAGTTAAGTAATGAATCCACTGAAAGCCGGTGATA
TCGCACCGAAATTTAGCTTGCCGGATCAAGACGGAGAACAAGTTAATTTGACCGACTTCC
AGGGACAGCGTGTTCTGGTTTATTTCTACCCGAAAGCCATGACCCCCGGCTGTACCGTAC
AGGCCTGCGGCTTACGCGATAACATGGATGAGTTGAAAAAAGCGGGCGTTGATGTGCTGG
GTATCAGCACCGATAAACCCGAAAAACTCTCCCGTTTTGCGGAAAAAGAGCTGCTTAACT
TTACGCTCCTGTCTGATGAGGACCACCAGGTGTGCGAACAATTCGGCGTCTGGGGTGAAA
AGTCCTTCATGGGCAAAACCTACGATGGTATTCATCGCATCAGCTTCCTGATTGACGCTG
ATGGCAAAATCGAACATGTCTTTGACGATTTCAAAACCAGCAATCACCACGACGTTGTGC
TGAACTGGCTGAAAGAACACGCCTGATTACTTTGCTCCATTCCGTGCTGGCTGCGCTTGC
GGCCAGCACATCTCACATCTTCTCACTGCCCTGCAACACTCGTTTCAAATTTTTTCGCTG
AAGGTCAGTCTTGCGCGATTTGCCCATCAGGCCAGGCGTGAATCACGGCTTTGATCAGCG
TCGCCAATGGAATAGCGAAGAATACGCCCCAGAATCCCCACAAACCACCGAAGATCACCA
CCGATAAAATAATCACCAGAGGATGCAGGTTAACCGCTTCGGAGAACAACACCGGTACTA
ACAGGTTGCCGTCCAGCGCCTGAATAATCAGATACACCGCGAAACAGCTCCAGAATTCCG
TGCCAGCACCAAACTGGAATAGCGCCACGCCAATCACCGGAATGGTCACCACAAATGCGC
CAATGTACGGAATAAGTACCGAGAAGCCGACCAGCACCGCCAGCAGCAGCGAATAGTTCA
GCCCGAAGAGTAAGAACCCCAGCCAGGTGGCGATCCCTACCACGATCATCTCCAGCACTT
TGCCGCGGATATAGTTGGTGATTTGTTGATTCATCTCCTTCCACACCTGTCCTGCCAGTC
CACGGTTGCGCGGCAGCACCCGGCGAACGGCGTTCAGCATCTGCTCTTTGTCTTTCAGCA
GGAAGAAGACCATCAATGGCACCAGCACCAGATAGACGGCAATGGTCAGCAAACCGACCA
ACGAGGCGAGGGAAATTTTCACCACCGAATCGCCCATGGTCAGCATCCGACTGCGCATAT
TTTCGGCCATTGCATCAATAATGCCCGCATCCATTAACGCCGGATAGCGGCGCGGCAACG
TGGCGGCAAAGTCAGAAAGCTTATTGAGCATCCCCGGCATATCGCGGATTAAGTAGATGC
CCTGCTGCCAGGCAATAGGCAGAACCACGAACGCCATCAGTAGCAGGATGCCCACAAACA
GGATCAGCACGATAGATGTCGCCCAAGGGCGGGAACAGCCAATAGACTGCAGGCGGACAG
TCGGCCATTCCAGTAAATAGGCCAGAACAATAGCCACCAGCAACGGAGCAAGCAGTCCAC
TAAAGAAAAAGATAATGCCAAATCCGGCAACTAAAATAACCAGCAAGGCAATCGCTTCCG
GATCGCTAAAACGGCGGCGATACCATTGCATCAACATTTCGAGCATACAGACCTTCCCTG
AACCTCAAGAGCGGGATTGCGATCCGCAATTGTATCGAAATGTCACAAAAAAGACTTCGC
TTTTTATGACGGATTCAGGAAACTGAAAAGTCATTTGAGTGGGCTAATCTTCGCCGTTAC
ACTCAAAGGCGGCGCGGTGGGAACGATATTTCACAGTATCGGTCAAATGACTATCTCCAG
AAATACAGGATAGAGGTTATGTTCAGGCAGTTGAAAAAAAACCTGGTTGCAACCCTCATT
GCTGCTATGACCATTGGTCAGGTAGCCCCGGCGTTTGCCGACAGCGCAGACACCTTGCCG
GATATGGGAACCTCCGCAGGAAGCACACTTTCCATTGGTCAGGAAATGCAGATGGGCGAC
TATTATGTCCGCCAGTTACGCGGCAGCGCGCCGTTAATTAATGATCCGCTGTTAACGCAA
TACATTAATTTGCTAGGAATGCGTCTGGTTTCGCATGCCAATTCGGTTAAGACACCGTTT
CATTTCTTTCTGATCAACAACGATGAAATTAACGCCTTTGCTTTCTTTGGCGGCAACGTG
GTGCTGCACTCTGCCCTGTTCCGTTATTCCGATAACGAAAGTCAACTGGCTTCAGTTATG
GCGCACGAAATCTCCCACGTCACCCAACGTCACCTGGCGCGAGCGATGGAAGATCAGCAG
CGCAGCGCGCCGCTGACCTGGGTCGGCGCGTTAGGTTCTATTTTACTGGCGATGGCCAGT
CCGCAGGCGGGGATGGCGGCGCTGACCGGTACACTGGCGGGAACGCGCCAGGGGATGATC
AGTTTCACCCAGCAAAATGAACAGGAAGCGGACCGCATTGGTATTCAGGTGCTGCAACGC
TCGGGATTCGATCCGCAGGCGATGCCGACCTTCCTCGAAAAATTACTCGATCAGGCGCGT
TACTCTTCGCGCCCACCAGAAATTCTGCTCACTCACCCACTACCGGAAAGCCGTCTGGCT
GATGCCCGTAACCGTGCCAATCAGATGCGCCCGATAGTGGTGCAATCGTCAGAAGATTTC
TATCTGGCAAAAGTGCGCACACTGGGGATGTACAATTCAGGGCGTAACCAACTCACCAGT
GATTTGCTGGATGAATGGGCGAAAGGAAACGTTCGTCAGCAACGAGCGGCGCAATATGGT
CGTGCTTTACAGGCGATGGAAGCCAATAAATACGACGAGGCACGTAAAACGCTGCAACCG
TTACTGGTGGCAGAACCTGGCAACGCATGGTATCTCGATCTGGCTACCGATATTGATCTT
GGGCAAAACAAAGCCAATGACGCTATCAATCGCCTGAAAAATGCCCGCGATTTGCGCACC
AATCCGGTGTTGCAGCTCAACCTGGCGAACGCTTATCTGCAAGGGGGCAACCACAGGAAG
CGGCCAATATTCTGAATCGCTACACTTTTAACAATAAAGATGACAGCAACGGCTGGGATT
TACTGGCACAGGCGGAAGCCGCACTAAATAACCGCGATCAGGAACTGGCTGCGCGAGCAG
AAGGTTATGCGCTCGCCGGGCGACTCGATCAGGCTATTTCCTTGTTGAGTAGCGCCAGTT
CGCAGGTGAAATTAGGCAGCCTGCAACAAGCGCGTTACGATGCGCGCATCGACCAGTTGC
GCCAGCTGCAGGAACGCTTTAAGCCTTATACCAAGATGTAATTCGCATTAAAGGAAGAAC
AATGACCAAACAGGTAAAAATCTACCATAACCCACGCTGTTCAAAGAGCCGGGAAACGCT
GAACCTGCTGAAAGAAAACGGCGTGGAGCCAGAAGTGGTGCTCTACCTTGAGACACCCGC
CGATGCGGCAACGCTGCGCGATTTGCTGAAAATGCTGGGGATGAATAGCGCTCGTGAATT
GATGCGCCAAAAAGAGGATCTTTATAAAGAACTGAACCTGGCTGACAGTTCGCTTAGCGA
AGAGGTGCTGATTCAGGCGATGGTAGAGAATCCGAAGCTAATGGAACGCCCGATTGTGGT
CGCGAATGGCAAAGCGCGGATTGGTCGTCCACCGGAGCAGGTACTGGAAATCGTGGGTTA
AGATGTGCTCCATCGCTAGTTGAAGCACATTGCCGGATGCGACGCTTGCCGCGTCTTATC
CGGCCTACGAATACTATGGATTAACTTCGCGTAGGTCGGATAAGGCGTTCGCGCCGCATC
CGACAATAAACACCTTATCTACAACTTCAGAATTTCTTTCACAAACGGAATGGTCAGCTT
GCGTTGCGCGGTAATCGACGCACGATCCAGCTGATCCAGCGTCATAAACAACGTGCGCAT
TTCTCTGTCGAGCCGCTTCAGCAAGAAACGCCCCACATCTTCCGGCAGTTCAAAACCACG
CAAACGCGCGCGTAACTGTAGCGCCTGCAACTTATCTTCATCAGAAAGTGGCTGCAATTT
GTAGATCTGCCCCCAGTCGAGACGCGACGCGAGATCCGGTAATCCAAGATTCAACTGCCG
CGGTGGACGATCGCCGGTGATCAACAACCGTGTTTTGCCCGATTCCAGAATTCGATTGTA
AAGATCGAAAATCGCCATCTCCCACAACTCATCGCCGGCAATACACTCAATGTTGTCAAT
ACAGACCAGCGACAAATGCTCCATACCGTCGAGCACTTCCGGAACAAACCAGGTGCGTTT
ATCCAGCGGGACATAGCCCACCGCATCGCCACGCTGTGACAATTCCGCGCAAGCCGCGTG
CAGCAGATGGCTGCGCCCCGCGCCTTCGCGTGCCCAGAGATAGATGTAACCGCTATGTTC
CTGACGCAGCACGTTTTGCAGCGCGGCCAGTAAAGAGGAGTTATCCCCCGGCCAGAAACT
TGCAAAGGTTTCGTCGTCAGGAAGATAAAGTGGCAAAGAGAGCTGTGCCGGTGTGTTCAG
AGATACCTCAACCAGGATTTCACAAAATCGCGAGAAGTTTACCACAGAATCCCATGATGT
TTGAACCGGGCAGCAACACTGCCCGGTCGGTACATTATTTGTCTGTTATATCCGCGTCTT
CTGCGTCCAGCACCACTTCTTCAGGGCGCAGCATACTAATCAGTTTGAAGATCAAACTTA
AGCCGATACCGACGATGGTCGCCAGCGCCATACCTTTCAGCTCCGCCGCGCCAATGTTTA
CCTTCGCGCCACTGACGCCGATGATCAAAATAACGGAAGTCAGGATCAGGTTCTGTGCTT
TGTTGTAATCCACTTTCGATTCGATCAACACACGAATACCGGAAGCACCGATGACACCGT
AAAGCAGCAGCGAAACGCCGCCCATCACCGGCAATGGAATCATCTGGATAGCAGCAGCCA
GTTTACCGACGCAGGAAAGCAGGATAGCGAAAATCGCCGCACCGCCGATAACCCAGGTAC
TGTAAACACGGGTGATCGCCATCACGCCAATGTTTTCCCCGTAGGTGGTGTTTGGTGTGG
AACCAAAGAAACCGGAGATCACGGTCGACAAGCCGTTAGCAAACATCGAACGGTGCAGAC
CTGGATCGCGCAGCAGATCTTTTTTGACGATATTAGCCGTTACCACCAGGTGCCCTACGT
GTTCGGCAATAACCACTAACGCCGCTGGCAGAATAGTCAGAATGGCAAACCACTCGAAGC
GCGGCGTATAGAGGGTTGGCAGCGCAAACCAGTGAGCATTAATAATCGGCGTGGTATCGA
CAATTCCCATTGCGAAAGAGAGCGCGTAGCCCACCAGCACGCCAATTAAAATCGGGATAA
TTGCCAGGAAACCACGAAACAGCACGGAACCTAAAACCGTAACCGCCAGCGTGGTAATGG
AGATGATGATGGTTTTGGAGTCTGGAGTTTGCCCTTCAGCCGGGAGTAAACCTGCCATAC
CGGCAGCTACGCCCGCCAGCTCCAGACCGATGACGGCAACGATTGCGCCCATTGCCGCAG
GTGGAAACAGCACGTCCAGCCAGCCGGTCCCCGCTTTCTTCACGATAAAAGAAACCAGGC
AGAACAGCACGCCGCACATAATAAAGCCGCCCAGCGCGACTTCATACCCCAACGGCAACA
GTAACAATACCGGTGAAATAAAGGCAAAGCTGGAACCAAGATAAGCCGGAATTTTCCCTT
TACAGATGAAGAGATACAGCAGTGTTCCTATACCGTTAAATAACAGTACAGTCGCCGGGT
TAATATGAAATAAGACGGGCACCAGGACGGTTGCACCAAACATGGCGAACAAATGTTGCA
AACTAAGCGGGATTGTCTGTAAAAGTGGCGGTCTTTCACTCACCCCGATAGCACGGCGCG
TCATAGTATTATCCTCTGTATTATGTGTTATAGGCGCTTTACTCAAAAAAAGCCGACTCT
TAAAGTCGGCTTTAATTATTTTTATTCTTTATTTCGTACCAAAGATTTTGTCACCGGCAT
CGCCGAGGCCCGGAATAATGTATCCGTGCTCGTTCAGTCCCTGGTCAATCGATGCAGTAT
ACAGTTCGACGTCCGGGTGCGCTTTTTCCAGCGCAGCGATACCTTCTGGTGCAGCTACCA
GCACCAGAACTTTGATGCTGCTGCAGCCCGCTTTTTTCAGCAGGTCGATGGTCGCGATAA
CGGAACCACCGGTTGCCAGCATTGGGTCAACGATCAGCGCCATACGCTCATCGATGTTAG
AAACCAGTTTCTGGAAGTACGGTACCGGCTCCAGCGTTTCTTCATTACGGTACATACCGA
CGACACTGATGCGCGCACTCGGAACGTTTTCCAGCACACCGTCCATCATCCCAAGACCCG
CACGCAGAATTGGCACAACGGTAATTTTCTTACCTTTGATCTGGTCGATTTCTACCGGGC
CGTTCCAGCCTTCGATAGTGACTTTTTCCGTTTCGAGGTCGGCGGTCGCTTCGTAAGTCA
GCAGGCTACCCACTTCGGAAGCGAGTTCGCGAAAGCGCTTGGTGCTGATATCTTGCTCAC
GCATCAGTCCCAGCTTGTGTTTGACGAGTGGGTGTTTGACTTCCACGATCTTCATACTCT
TTCTCCTTTGAGGGGCAGCCACAAAAAAATCGACGGATTATACCTCCTTTCTTCAAGGCG
GCAATATTATTTTCGTTGACTTTAGTCAAAATGATAACGGTTTGAGATAAAGTTATTTTA
TATTCAAATGGTTATGGAAGAAGATTATTCCATCCGAAAACGATCCTTTGCCCTGGTACA
AGTATTCTTTCGCCGCGCGCCTGGGGAAAAGACGTGCAAAAAGGTTGTGTAAAGCAGTCT
CGCAAACGTTTGCTTTCCCTGTTAGAATTGCGCCGAATTTTATTTTTCTACCGCAAGTAA
CGCGTGGGGACCCAAGCAGTGACCGATAAAACCTCTCTTAGCTACAAAGATGCCGGTGTT
GATATTGACGCGGGTAATGCTCTGGTTGGAAGAATCAAAGGCGTAGTGAAGAAAACGCGT
CGTCCGGAAGTGATGGGCGGTCTGGGCGGCTTCGGTGCACTGTGTGCATTGCCGCAAAAA
TATCGTGAACCTGTGCTAGTTTCCGGCACTGACGGCGTAGGTACCAAGCTGCGTCTGGCG
ATGGACTTAAAACGTCACGACACCATTGGTATTGATCTGGTCGCCATGTGCGTTAATGAC
CTGGTGGTACAAGGTGCGGAACCGCTGTTTTTCCTCGACTATTACGCAACCGGAAAACTG
GATGTTGATACCGCTTCAGCGGTGATCAGCGGCATCGCGGAAGGTTGTCTGCAATCGGGC
TGTTCACTGGTGGGTGGCGAAACGGCAGAAATGCCGGGGATGTATCACGGTGAAGATTAC
GATGTCGCTGGTTTCTGCGTTGGCGTGGTAGAAAAATCAGAAATCATCGACGGATCTAAA
GTCAGCGACGGCGATGTGCTGATTGCACTCGGCTCCAGCGGCCCGCACTCGAATGGCTAT
TCGCTGGTGCGCAAAATTCTTGAAGTCAGCGGTTGTGATCCGCAAACCACCGAACTTGAT
GGTAAGCCATTAGCCGATCATCTGCTGGCACCGACCCGCATTTACGTGAAGTCAGTGCTG
GAGTTGATTGAAAAGGTCGATGTGCATGCCATTGCGCACCTGACCGGCGGCGGCTTCTGG
GAAAACATTCCGCGCGTATTGCCAGATAATACCCGGGCAGTGATTGATGAATCTTCCTGG
CAGTGGCCGGAAGTGTTCAACTGGCTGCAAACGGCAGGTAATGTTGAGCGCCATGAAATG
TATCGCACCTTCAACTGCGGCGTCGGTATGATTATTGCCCTGCCTGCTCCGGAAGTGGAC
AAAGCTCTCGCCCTGCTCAATGCCAACGGTGAAAACGCGTGGAAAATCGGTATCATCAAA
GCCTCTGATTCCGAACAACGCGTGGTTATCGAATAATGAATATTGTGGTGCTTATTTCCG
GCAACGGAAGTAATTTGCAGGCAATTATTGACGCCTGCAAAACCAACAAAATTAAAGGCA
CCGTACGGGCAGTTTTCAGCAATAAGGCCGACGCGTTCGGCCTTGAACGAGCCCGCCAGG
CGGGTATTGCAACGCATACGCTCATCACCAGCGCGTTTGACAGTCGTGAAGCCTATGACC
GGGAGTTGATTCATGAAATCGACATGTACGCACCCGATGTGGTCGTGCTGGCTGGTTTTA
TGCGCATTCTCAGCCCGGCGTTTGTCTCCCACTATGCCGGGCGTTTGCTGAACATTCACC
CTTCTCTGCTGCCGAAATATCCCGGATTACACACCCATCGTCAGGCGCTGGAAAATGGCG
ATGAGGAGCACGGTACATCGGTGCATTTCGTCACCGATGAACTGGACGGTGGCCCGGTTA
TTTTACAGGCGAAAGTCCCGGTATTTGCTGGTGATACGGAAGATGACATCACCGCCCGCG
TGCAAACCCAGGAACACGCTATTTATCCACTGGTGATTAGCTGGTTTGCCGATGGTCGTC
TGAAAATGCACGAAAACGCCGCGTGGCTGGATGGTCAACGTCTGCCGCCGCAGGTCTACG
CTGCCGACGAGTAATGCCCCCGTAGTTAAAGCGCCAGCTCTGCCGCTGGCGTTTTTCAAT
TCACCTGTAAATCGCAAGCTCCAGCAGTTTTTTCCCCCTTTTCTGGCATAGTTGGACATC
TGCCAATATTGCTCGCCATAATATCCAGGCAGTGTCCCGTGAATAAAACGGAGTAAAAGT
GGTAATGGGTCAGGAAAAGCTATACATCGAAAAAGAGCTCAGTTGGTTATCGTTCAATGA
ACGCGTGCTTCAGGAAGCGGCGGACAAATCTAACCCGCTGATTGAAAGGATGCGTTTCCT
GGGGATCTATTCCAATAACCTTGATGAGTTCTATAAAGTCCGCTTCGCTGAACTGAAGCG
ACGCATCATTATTAGCGAAGAACAAGGCTCTAACTCTCATTCCCGCCATTTACTGGGCAA
AATTCAGTCCCGTGTGCTGAAAGCCGATCAGGAATTCGACGGCCTCTACAACGAGCTACT
GCTGGAAATGGCGCGCAACCAGATCTTCCTGATTAATGAACGCCAGCTCTCCGTCAATCA
ACAAAACTGGCTGCGTCATTATTTTAAGCAGTATCTGCGTCAGCACATTACGCCGATTTT
AATCAATCCTGACACTGACTTAGTGCAGTTCCTGAAAGATGATTACACCTATCTGGCGGT
GGAAATTATCCGTGGCGATACCATCCGTTACGCGCTGCTGGAGATCCCATCAGATAAAGT
GCCGCGCTTTGTGAATTTACCGCCAGAAGCGCCGCGTCGTCGCAAGCCGATGATTCTTCT
GGATAACATTCTGCGTTACTGCCTTGATGATATTTTCAAAGGCTTCTTTGATTATGACGC
ACTGAATGCCTATTCAATGAAGATGACCCGCGATGCCGAATACGATTTAGTGCATGAGAT
GGAAGCCAGTCTGATGGAGTTGATGTCTTCCAGTCTCAAGCAGCGTTTAACTGCTGAGCC
GGTGCGTTTTGTTTATCAGCGCGATATGCCCAATGCACTGGTTGAAGTGTTACGCGAAAA
ACTGACTATTTCCCGCTACGACTCCATCGTCCCCGGCGGTCGTTATCATAATTTTAAAGA
CTTTATTAATTTCCCCAATGTCGGCAAAGCCAATCTGGTGAACAAACCACTGCCGCGTTT
ACGCCATATTTGGTTTGATAAAGCCCAGTTCCGCAATGGTTTTGATGCCATTCGCGAACG
CGATGTGTTGCTCTATTATCCTTATCACACCTTTGAGCATGTGCTGGAACTACTGCGTCA
GGCGTCGTTCGACCCGAGCGTACTGGCGATTAAAATTAACATTTACCGCGTGGCGAAAGA
TTCACGCATCATCGACTCGATGATCCACGCCGCACACAACGGTAAGAAAGTCACCGTGGT
GGTTGAGTTACAGGCGCGTTTCGACGAAGAAGCCAACATTCACTGGGCGAAGCGCCTGAC
CGAAGCAGGCGTGCACGTTATCTTCTCTGCGCCGGGGCTGAAAATTCACGCCAAACTGTT
CCTGATTTCACGTAAAGAAAACGGTGAAGTGGTGCGTTACGCACACATCGGGACCGGGAA
CTTTAACGAAAAAACCGCGCGTCTTTATACTGACTATTCGTTGCTGACCGCCGATGCGCG
CATCACTAACGAAGTACGGCGGGTGTTCAACTTTATTGAAAACCCATACCGTCCGGTGAC
ATTTGATTATTTAATGGTGTCGCCGCAAAACTCTCGCCGTCTGTTGTATGAAATGGTGGA
CCGCGAGATCGCCAACGCGCAGCAAGGGCTGCCCAGTGGTATCACCCTGAAGCTAAATAA
CCTTGTCGATAAAGGCCTGGTTGATCGTCTGTATGCGGCCTCCAGCTCCGGCGTACCGGT
TAATCTGCTGGTGCGCGGAATGTGTTCTCTGATCCCCAATCTGGAAGGTATTAGCGACAA
CATTCGTGCCATCAGTATTGTTGACCGTTACCTTGAACATGACCGGGTTTATATTTTTGA
AAATGGCGGCGATAAAAAGGTCTACCTTTCTTCCGCCGACTGGATGACGCGCAATATTGA
TTATCGTATTGAAGTGGCAACGCCGCTGCTCGATCCGCGCCTGAAGCAGCGGGTGCTGGA
CATCATCGACATATTGTTCAGCGATACGGTCAAAGCACGTTATATCGATAAAGAACTCAG
TAATCGCTACGTTCCCCGCGGCAATCGCCGCAAAGTACGGGCGCAGTTGGCGATTTACGA
CTACATCAAATCACTCGAACAATCTGAATAACCCTATGCCAATACACGATAAATCCCCTC
GTCCGCAGGAGTTTGCTGCGGTCGATCTTGGTTCAAACAGTTTTCACATGGTCATAGCCC
GTGTGGTAGATGGTGCCATGCAGATTATTGGCCGCCTGAAACAGCGGGTGCATCTGGCGG
ACGGCCTGGGGCCAGATAATATGTTGAGTGAAGAGGCAATGACGCGCGGTTTGAACTGTC
TGTCGCTATTTGCCGAAAGGCTACAGGGGTTTTCTCCTGCTAGCGTCTGTATAGTTGGTA
CCCATACGCTGCGTCAGGCGCTGAACGCCACTGACTTTCTGAAACGCGCGGAAAAAGTCA
TTCCCTACCCGATCGAAATTATTTCCGGTAATGAAGAAGCCCGTCTGATTTTTATGGGCG
TGGAACATACCCAACCGGAAAAAGGTCGCAAACTGGTTATTGATATTGGCGGCGGTTCTA
CAGAACTGGTGATTGGTGAAAATTTCGAACCGATTCTCGTTGAAAGCCGCCGGATGGGTT
GTGTCAGCTTTGCCCAGCTTTATTTCCCTGGCGGGGTCATCAATAAAGAGAATTTTCAGC
GCGCTCGCATGGCGGCAGCACAAAAACTGGAAACGTTAACCTGGCAATTTCGAATTCAGG
GCTGGAACGTGGCAATGGGCGCTTCCGGTACCATAAAAGCCGCCCATGAAGTGTTAATGG
AAATGGGCGAGAAAGACGGGATAATTACCCCGGAACGTCTGGAAAAACTGGTAAAAGAAG
TTTTACGGCACCGTAATTTCGCATCGCTGAGTTTACCAGGTCTTTCCGAAGAGCGGAAAA
CAGTCTTCGTTCCTGGACTGGCGATTTTATGCGGTGTGTTTGATGCTTTAGCCATCCGTG
AACTGCGCCTTTCTGACGGGGCGTTACGCGAAGGCGTACTGTATGAAATGGAAGGACGTT
TCCGTCATCAGGATGTGCGTAGTCGCACTGCCAGCAGCCTCGCCAACCAGTATCACATCG
ACAGCGAACAGGCCCGACGGGTGCTGGATACCACTATGCAAATGTACGAACAGTGGCGGG
AACAGCAACCGAAGCTGGCGCATCCACAACTGGAGGCGCTACTGCGATGGGCCGCCATGC
TGCATGAGGTCGGGTTGAATATCAACCACAGCGGTTTGCATCGCCACTCCGCTTATATTC
TGCAAAACAGCGACTTGCCGGGTTTTAATCAGGAACAGCAGCTGATGATGGCGACACTGG
TGCGCTATCACCGTAAAGCGATTAAACTCGACGATCTGCCGCGCTTTACCTTGTTTAAGA
AGAAACAGTTCCTGCCACTGATTCAGCTATTGCGCCTTGGCGTATTACTCAATAATCAAC
GTCAGGCAACCACCACACCGCCAACATTGACGCTGATTACTGATGACAGTCACTGGACAC
TGCGTTTCCCGCATGACTGGTTTAATCAGAATGCACTGGTACTGCTTGATCTGGAAAAGG
AGCAAGAATACTGGGAAGGCGTGACTGGCTGGCGGTTGAAAATTGAAGAAGAAAGTACAC
CAGAAATCGCCGCTTAATGCTTTGCGGGCCGACGAGAAATGTCGGCCCGCATTATTCAGG
CACTTTCGCGAATGGGTTCGATTTCATTCAGCGTATCAATTAACGGTTGCGGCTTACCAA
TAAGATAACCCTGCATATAATCGATCCCCAAAGAGAGCACCGCCTCGCGGATCTCTTCGT
TTTCAACGTACTCCGCCACTACCCGCATTTTCTTCATTCGCGCCAGGTGGCAAATCGACG
CCACTATCTGATAATCCAGACTATTTGACACAATATTGCGGATAAAACTGCCGTCAATTT
TAAGCAGATCGGCATTCACATTTTTAAGCCGCGCATAGCTGGCGTAGCCGGTGTCGAAAT
CATCAATCGCAATCTGGCAGCCTAATTCCTGAAGATGCTGCAAGGTGATTTGCGCCTGCT
TAACATTGGTCAGAGCATTACTTTCGGTGACTTCAAAAATAAGTTGCCACGCTTCAATCT
GATATTTAGCCAGCAGCTGACTGACTTCAACAGGAAAACGAGCCTGACATACCGAGGTTG
GAGACAGATTAATAGCAAAACGGTGAGCGGGCATCTTCGCTCTGTTTTCAGCCATAAATT
GCAGCGTATGCTCAAGGACCCACATGTCGATACTCGACGATAAACCAAATTCGTGCGCGA
CCGGTAAGAAGCTATCGGGGCTGATCAGCTCATCATTCTCACCCTTCATGCGCAGAAGAA
TTTCATGGTAAACATCACCACGCATACCGGTAATCGGCTGGGCCATCAGGAAAAAATGGT
TGTGTTCCAGCGCCTGCTGTAGTCGATTCATCATCACGACTTTATCTTTCAATTCGCGTT
GCAAATACATTGCTCCGCGACGCTGCATATTTTCCGGGGTGTTGGTCACGATGGAAAGTT
CGGCCACCGTATTTAGCTCTCCCAGCAGCAGGTAGATATGATTCACCGGCGAGCGCACAT
AGCAGTAACTGACGCCAATCTGCGGTTGCATCGGCATTCCATCCCAAAAGAAACGAAATT
GCTTGAGATGGCTATCCAGTGCGGTAATGCGCTCCTGGTGCGATTCTGTATTCAGCCGCA
GCGCGAGATCGTTACCCGAAAGCTGATAAACATCTTCACCCGGTTCCAGCAAGGGTGACA
GCCAGTGAGAAAGTTTTTGCTTATATTGAATCCGCAGCATGATGCCATAATTCTTAACCA
GCATTTCCATGCCAGGGATGCGTAAATAACAAAGCGCAGACCAGGGGCATCACGTAACGC
GCGATTCAGGGCGCGAACATTTGGCAGATGAACCACCGGGTCCACATACGCAAGCCGCTG
AATGCGTCTGACTACCGCTCGCTGACGGGTTGCCAGTACAGCCATATAATTGACAATAAA
AGAGAATACCAGATAACTGGAGGAGGTTATGGTCAGCTGCGTGGTATAGCCAGGATAAAT
GGGAATGTAATTTTGATAGCTGTGGATGCTGATCATCAACACGACCGCCCAGAGCAATGA
AATCAGCTTATAACCATAGCGCATCGCTCCCCACATCATCAGGGGCAGCAATAATGACAA
GGTGTAATTGGTGCTAAAAATCGTGCTTTTTTCATTTAACGGCATGCATAACAGCAACAA
TAAAGCACCTAATGCCAGTAGCCAGATTGCGAACTCTTTTTGGGTAACTTTGGCATCAAC
CTGCTGTTTTAATTGCGAATAATAGCTACGTAAATAAAACGGATTTCGCACCACCCGAAT
GATGAAGTAGCACAGCGGGACACCAATCAGATTACCCACCAGCAAGGCCTGATAATTGAT
TAAGGTCCCGAGGTTAAAGGGCATGACGCCGACCAGATTTTCTCTGCTCGCCAGTAATCC
AACAAACGCAGCAAACTGGAAAAGTATCAGAAACAGCGTTGCAGGAAACACAATCTGCCA
GAATAGTCGCTGGGAAATTAAACGGCTATCACCATGTGAAACGTTGTTACGCCGGGGAGT
AAAAACCCTGTAACCGCCCCAACAGAGAATGATAATGATAATAAAATTAGCCGTTAATGA
GAGCGTTTCGTAAAAACCCAGCTCTGCATATTTGCGGACAAAAATCCCTAAGGCGATCCC
TGGCAATGCCGCCCAGTTGAAAAACATCATCATGCTGATCATCAGTGCCAGTGGCAGATA
AAAGAGAAAAACTTCACCGGAAGAAATATGAGCGAAAGTATTAATGTGGGCGAAAATGGG
CAAGATTAAAGAAGGCAGGAACAGCGGAAGCCCCCACCATTTATCACGTATTTTTATATA
AGTTGCATTCAGTTTCATAGATGCTCAGCAGAATCCCCCACATCCTGAAGGAGGTGTATT
CAGACAGGCATCCCACCTGACTTCGAATGATGATTATTCATCACTATAGAGAGCAATGAT
TCTAAGTGTCATATGAAAGTTCCAATTGATATATATCAAACAAAATAACCCTGATTAATG
AATTATTACGTTTATCATGTTAACTCATCATTATTACATCATCATTGTAAATAATTAAAT
TAACTTCCATAACATTAAAATATGTATCAACTGACGCTTTTTTACATAACGAAGAATTGA
CCATTTTGTCCTGTTGTGCCTTAATGTAAGTACCGTCCACGGCGTGGGACATACTTCAAG
GAACCTTTTGTGAGTCAGGCAACCAGTATGCGAAAACGACACCGATTTAACAGTCGCATG
ACCCGTATCGTACTGCTCATCAGCTTTATCTTCTTCTTTGGCCGTTTTATCTACTCGTCC
GTCGGTGCCTGGCAGCACCATCAGAGCAAAAAAGAAGCTCAGCAATCCACACTCTCCGTC
GAATCACCGGTACAACGTTAGCGGTTACCTTCTCCACTCTCACAGAACATAACGGCACCT
CGCTGTCGGATGCTTTTGCTCTTTGAGATTATCAAAGCGGCAGATATTCTTTCATCTTAA
ATTTTACGTCTTTGTTCTGACTGAAGTTCATCCTGTTCGGCTGCGAAATAAATACATCAT
TAATACATATGTTGTGATGATGTATTTTTATAAATTATTTCCCACATGAATTTTAATAAA
TTTAATCTATTCCTTTATACGCAATACATTTACTTTCCTCTTTTGATGATCTTAAATGTC
TTATTTTTCGTAATGTGTATAACAAGGAATAGTGATGAAATTTAAAAAATGTCTTCTGCC
TGTGGCAATGTTAGCGTCATTCACTCTGGCAGGATGCCAGTCAAATGCTGATGATCATGC
CGCCGATGTTTATCAAACCGATCAACTGAATACCAAACAAGAAACTAAAACCGTTAATAT
TATTTCCATTCTTCCCGCAAAAGTTGCCGTAGACAACGCCCAAAATAAACGGAACGCACA
AGCCTTCGGCGCGCTTATTGGCGCTGTCGCTGGCGGTGTTATCGGCCACAACGTCGGGTC
TGGCAGCAATTCCGGAACGACAGCAGGTGCAGTTGGCGGCGGAGCTGTTGGCGCAGCAGC
GGGTTCTATGGTGAATGATAAAACCTTAGTGGAAGGTGTTTCTTTAACATATAAGGAAGG
CACCAAAGTGTATACCTCCACCCAGGTGGGTAAAGAGTGCCAGTTTACGACAGGTTTAGC
CGTTGTTATTACCACGACGTATAACGAAACGCGTATTCAGCCAAATACCAAATGTCCTGA
AAAGAGCTAATAATCAGGAGGAGTCATGAAGAAAGTTTTTCTTTGCGCCATCTTAGCCTC
CTTAAGCTATCCGGCTATCGCCTCATCATTGCAGGATCAACTCTCGGCTGTCGCAGAAGC
GGAACAGCAAGGTAAAAATGAAGAGCAAAGGCAGCATGACGAATGGGTCGCGGAGCGCAA
CAGGGAAATCCAGCAAGAGAAGCAACGTCGCGCAAACGCCCAGGCCGCGGCTAATAAAAG
AGCGGCAACGGCAGCAGCGAATAAGAAAGCTCGTCAGGATAAACTGGACGCCGAAGCCAC
TGCGGACAAAAAACGCGATCAAAGTTATGAAGATGAGCTACGCAGCTTAGAGATTCAGAA
ACAAAAACTGGCGCTGGCGAAAGAAGAAGCCCGCGTTAAGCGCGAAAACGAATTTATCGA
TCAGGAACTGAAGCACAAAGCTGCGCAAACCGATGTGGTGCAATCTGAAGCTGACGCAAA
CAGGAATATGACTGAAGGCGGTCGCGATCTGATGAAAAGCGTGGGCAAAGCAGAAGAGAA
TAAATCAGATAGCTGGTTTAACTAAACGATGTTAGTAACTTCAAGTCTATAATTCTTTAG
GATAAAAAACCCTCTGTAGTAACAGAGGGTTTTGTTCATTCATAGTGCAGGGTCAAATCA
TTCCCACTCAATTATTTACTAAACTCATAACTAATTGACTGAAAACAACTTTTAAAACAA
TGAAATTTTTCATACCGTTTTATATACCGTCACCGGAAATCAGTACCATGAAAAATGCCA
TGTCACCGGGTCAGCGAATCGTACTGCTTTTCACAGACTCGTCCGGCTTCTGCGGCCCGG
TCAGCGTACTCTGCCAGCTGTCGGTTTCGCTCGAGAGATTTGCTGAGCACGTCGGCAAGC
AAAACTCCGGTATCTGCGGCTGACGCCCCAGTGCCGACAGTGGAGTTATACTGCCTGAGC
TGCTCACGGATGGCAACGAGCTGTTGCTGCAACCTGCCAGCGCGAGCGGCAGCATCAAGA
GCATCATTGCGCGCCTTGTCGATCCTCTGCTGCGCTTCACGTTCATTGGTAGCTTTCTCC
TGTTCATCGTGATTACGGGCTTTATCATCAGCCTGTTTCTGGTCTTCCTGCGCCTGCGCA
TACCCGGCATAGTACTGGCGGTCACCGTGGACATTCCAGGCAGCCACGCCGCTGATGACA
AGAGCAGCAAGCATCGACACTATAAGCAACTGTTTCCAGTACGCTTTGATGAATGCCCAG
ATCATAACAGTGCCTTACGGGCAGCGGCGTAACGTGCTCGCCGGTCGTCGATACCGTTCT
GGCCACCGTTGATAATCTGCGTGACGCGCACCAGGTCTCCCGTGTACTTCATGCAGCCTT
TACTGGCGAAAAACCACGCCGCGCTGCGGGCCGCGTATTCATCCTGCGACAGCAGTTCAG
GCTGAGCGACCAGATCAACCTTCAGACCATTACCGCAATCCCGGTAGTTGTTCAGACCAG
TGATCTGGATAAGTCCACGACCGCGATAATTCCATCCATCACCCGGGCCGTTGTTACCCA
TGCGCTTGCTGTACACCAGATTGGCGATCGCGCGCTGGCGCTCCAGAGGAAGAGACTTCT
CATATGTTTTCCTGCCGAGTGCGTTGGCCTGGTCTGGAGTGATGCGCCCGGCACGGATAA
ACCCAGACAGCCCGTTAACGCTGTAGTTGAAGTTTTCCTGTAACCTGGTAAATCCTCCGG
ACTCATGCCCGACCTGCGCGATAAACATCGCCTGGTCATCTGGCTTGGTAATGCCAAACT
CATTCATAGCAGCAGTGATATGTTGGTACCAGCGTGCGGCCAGTTGCTCAGTGATACCGG
CTGCACGCCGGAACTGGTTAATGTCCATGTTGAGACCTCGATATTTTGAATATCTGCACG
ACGTTACCGCGCGTCTTCAGGACGGCGGCAAGCATGACAGCATTGATGATGACCTCTGAT
AAATCAGCGGCCATTGGTGTGTGATACCAGATTGCATATGCGGCGCGGACGGGGATGCTG
GCTGACGCCACGATAAGGAAGTAGGCTATCCACCCACCCCACCGGCGGTGTTGCGATCCA
TTACGCCGGAAGGTTCCGACGCGGATTGCTATCGCAGAACAGATAACCGCATTGGCGACG
AGTAAAATCAGCTCATGAGTTGTCATCGTCTTTTCTCCCCGGGATTAAATCGCGTGGATT
GTCGGAGCGGTGATAGAGCCAGATACCAATACGTACTGCGACGATTGCCGACACGAACGC
GCCAGCAGAGAAGACGATCCCTTTCTCAAAAGAGTCCTGCGTGATAGTTGGGATCAGGCT
TGCTACGCCGATAAGAATTGAGGCAGTTGGTTTGTAGAATAGAAGCCCGCAGAGGAAGCT
GAGCATCGACAGGAGAACCCGGCGGCGAATTGGATACTCAACGGCCGAGGTAATAAATAT
TACCGCGCCTGATAAAGCACCAAGCGCCACCTCTGGTGGAACTCCTGCGATCACTGCAGC
CAGAGAACCCATACTAAGCCACTGATTTAAAGACTCACTGGTTAGCTGGGCTGACATGGT
GACCACCGTTTACTGTGCATAAAGACCCCCATTAGTTGGTGATCACATCATACACAATAA
ACCATATATGGTTTAAATAAACTATGACACTCTTGGCGAGTTTCTACACATTATTTGTGG
ATAAATCTAACAAAATGAAAAAAATGCACAGAAAAGTTATGATTACTACAAGATTGTTTT
CGGGTAAATTGGCATGAAAAAAACGATATCAATTTCTTTGTTTATCATCATAGCTTGCAC
GTTAGCAGGAACAGCGTCTGAGGATGTTGCAAAAGAAAAACAGTACGTTAGTGTTAATGT
CCAGAAAGCAGACATAAAAATTCAGTACAAATATTCACTACTTGAAGACCGGGTAATTGA
GCTTAATAGAACTGGTCTTAACAAAATATTTTCATTTTCAAGGCTTTACAAAAATTTTTC
TTGGAAGTATACAGATTTTCCCAGTGGCAGACTGGATGGGTTAACGACAGTTCAAACATT
CGACACGGACATCATTGGACCAATTATGGTCAGCGCAGAAAGTAATGAAGATGGTGATGA
TCCAATAGCTGAGTTCACAGGTGGCTGGCATGGGTTTAATGGGAACCAGAGTGGCTCTCC
TACAGCCAGGCATGTTTCTCTTCAGGTATGGGTAGATGGGAAGATGGTCAATGATACATT
TAAGGGGTATACAAATGATTTAGTGATAGAAACCACGTCTAACATACAGGGCTTTAACAC
CAAAAAGAAAGATGGTTCTGGTAGAGAGATTATTCAACAGAAAGTAAAAATGAAATTTAA
TGAAGGACGTGCAGATGTGCATATCAAAATGGTTCCCCTTGAAAAGGTGAGGATACACAC
TTACTACGGACTACAAACTGCACTTTCCCAACTGTATGCTAATAGTTCAATTCGTTATGA
ATCAGGTGACTCTCAAGAATGGAAAGACACCTCCAGCGGACCAAATGATAGTGGCCCTAA
GGGTAAATATCCAAATGTTTACCGCATGACTGCAAAGAACAAACATAATGATGAAGTTGT
GGTATGGTTAGACACTAAATACGGATTAGGGAAAAGATTAAATGTGAGTGATAAGTATCC
TTCTGCTTTCTTTGTTGGATATAAAAGTTACTTCAATTTAATAAATGGTATTCCTTTAAT
TATTTCTACAGGACAATCGGCGGAAGTTCACGGAGGCTTAGAGTGGATAAGATCAAATTA
AACTACAGTGCACTTAATGGAATATAGTTGAACTATTTATAGACCAGCCATATCAATTAA
ATTTTAACAAACTGAGAATTAATAAGATTAAAATATGATATTGTCATTACAGTATTTAAG
AGGGATAGCGGCGATACTGGTAGTTCTTTACCATTATCGCGGTGAGTTAAATGCATCATA
TGCACAAAAAGGACTTGGGGATCTTCTTTTTAGCAATGGGTATATAGGTGTAGATTTATT
TTTTATGGTTAGCGGGTTTGTTATCATGCTATCAACAGAAAAAGATAAATCATCTTTATC
GTTTGCCATTAAAAGAATCTTTAGGCTATATCCAGTATATATAGTTTGTCTTATTTTATG
CACATATCTCCTATCAAAGCCAATAGATTTAAGCTTCTATAAGTCGTTGTTTTTTATACC
ATTATACATGAACTCACAAGCGCCATGGTTTGGGTATTCACTGATATATACTGCATGGAC
TTTAATGTATGAGATTATATTTTACTTTATTTTTTCATTTTCAATGATGGCATCATGGAG
ATATCGCGGGTTAATTTGCTCGGCTGTTCTTGTGGCGCTACCTTTTTTAATCGGATATTA
TTATAATAATAGCATTTCATTAAGTGGATATGACGCTGTAATAGCGCATACAGGTATTTA
TTTTTTTGACAGCGCTATCCGATTGTTGTCTTCACCTATGTTTATTGAGTTTGCAGTTGG
CATATTAATTTATGAAATATACAAGAGATCACGCAATAGATTTTTTCAGTTAGTATCAAC
AGGAATGGTAATAATTTCTTTGTCATTGTTTATTCTATATTACATTACTGGTGTAAATGG
TGGGCATGGAATAAATTCAAGCGGTATGTTTGCAGCTTTATTACTATTATCTCTTACAGT
TTATGAAAAAAACCATCCAATAAAACCAATTAAATCATTAAACTTTTTAGGTGATATTTC
ATATTCTCTATACCTCCCCCATCCAATAATAATACAATCAATAACAACATTGTTTTTCGT
TTCAAGCATATATTCCCCAAATGGTGGGTTTGGAAATGTTTATATAATGTTGATAATTGC
GTTTGCTTTATCTTCCATCCTATTCTATACAGTAGAAAAGCCTTTTGTTAATCTAGGAAG
AAAGATAATTAATAAGATTCGAAGATAGTTTAGCTGCGGGGTCAATGCCCCGCTTTTTTA
TTTTATCCTGTAATAAGTAGATCCTACACTAAGGAACTCATATATTCCTTGTGATGACAA
TGTAGTTATAAGTGTAGGTCCATTATAAATACCGATAGTCTGACCATTGAAATTTACTGA
TGAAAGATCTAGTAAAACCATGCTCCTAAGAAGCGTCCCATTCAATATAGTTAGCTCTGG
AAGCATTAGAGTTTTACCAGGAGATAAAGTACCGCCAAATTTTATTATATTTCTAGAATC
ATCAGGCCATGGTGAAGCCGAGTTAATATCAGGTATTATTAAAATCTTACCTGAGTCACG
ATAGTCTGATGTAGAATAGAATGTTCCTTTACCTGAAGTATGTTCGTTATCATAAATGCC
AGCAGGGGCATTTGTGAGAACAGGCTGATTAAATCTAGTACCTGCGAATCTTGCAATATC
AGGTGCAGAAGTAGACATCGTTAGTGTTGGTTGCCCATTACCATTAAACCCAATTGCGTT
TTCGCCAATACTTGATCTAGAAAATTCATTTACATCAAAGAAACCAATATCAGTGAATCC
ACCTTCGCTCACTGATTCATGGCTGTTTCCGGTAAATGAAAAATTAGTAAAACGAGATGA
GCATTTAAAAGCCGGTCCTGATTCTGTAGTGTGGTGCCTACCAAACTTAACACCGGTGAA
TGTAATGTTATCACCATTTACACAATCCATAACATTGCTGATGTACCCAGAACCTGAGTT
CCAACCAATAGAACCGCCTACCCATGAAAAACCATCAAACTCCAGAATGTCAAATATTTT
ACCGCCTGTAAAAGCATAGTGTGTGCAGTTTGATAACATACATGACTTCATTCTTCGGCC
ACGAAAACCATACTTAGTACCAAACAGATGGATATTAACAAACTGTCCGCCTTCAATTCC
TTGAATGCTGCCGCCACTCAAATCTGTACCGCCTACAAATTCTTTGGTCCCATCGACTAT
GATGTCATTCCACAATCCGTAATGACCCAGACCTGAACCTTCTCCGCCTCCATTTCCATC
TTTGAATGAGAAAGTTCGATATGTTTGCAGAACCCATAAGTTGCTTATAGTAGGGTTCTC
TATGACATCTAAACTGATGCATGCTGCTGTGCGCGGATAGGTGTCATCTGGTAACTGATG
CGCTCTTGATGTAAATCTGACAACTTTTGTGACGTTCGATATCTCTGACGAAGGGGTTCC
ATTGCATCCAGTAACTCCGGTTAATGTACAACTCCCATCAGAGTTATTAACAAGTCCTGT
AGCAAAGAAAACCCCAGAGTTAGTGCTGAATTGACAGAAGTTACTTACTGGAACACCTGC
GGTGTTGTTGTCAGTCAAAGGCCATGTAATTATATTTCCACCATTAGCCTGAAATGGATT
TGATACCAGAGTAATGGTGTTGGATGTTTTGCTTATCACATCTGTATTTTCTGATCCTAC
ATATTGTGATAACACCAGGCGGTCTAATGAATAGCAAACATTACCAAACACAATCCCCCT
TGAGTTAAGTCCAAACCTTATCTCTGGGACATTCCCCAGAGAGTTTATTACACCTTCACC
TCTTATTCCTATGGATACAGGGATTCCATCAATGGCAAATGGTATTGCAACCTCTGTGAT
TATGTTTACTTTTGAGTTAGCTGTAACAATCAACTCTCCGTAGCCAAGACGCACTAACGA
GTAAATAGCAAGTTTAATTGCTGGTGAATCATTTGTGATGCCGGGTTTCTCAATGAAATT
TTTTACTTCATTGATTCGGTAGCCATTCAGAAGTCCAACGCATGCCCATTTAGTTGTTTC
GACATCCGGAAATTCACCAGACGAGATGGTGTGAGGTAATGCTCCAGTCCATACGTACCA
TAGCCCATCAGCATAAAGACAAGCATCATTCTTAGATGAAATGGTTAAACCTGAAGAAAA
TTCTGCCTTTTTGACAAAAATTGATTGTTGGTAGTCGCTATAAACTGTGCCTCCATATGA
GCTACCAATTTTTTTATCACCGTTATTTGCCAGCTCAATTAAAACATCTGAAGCAGAACC
AGATTCAGGTAAAACAGCAATAGGTTTACCGCCAGAATCAAAAGCAAGTATTTTATTTGA
TCTATCAGCATTTGATGGTATCTGGTCAACATAATCCTCAGGAACTCTTAAGGTTCTTTT
AAATAGAGAATCTGCATAAGAAATGTTACCTTCAGCAACTCCGTCAACGTAATTTTTTGT
AGCTGCATCCTGTGGTCGTGACGGGTCACGAAGATTTCGTATGTAGTTACCCAAGGCATC
ATAATAATTTGCAATAAAAGATGGCTTACGTAAAGAAAGGCGCAGCCAACTAATTGCCTG
CTGTATCAGCATGGTCAACTTATCAAAAGCATCCTCATGCACTTCTGCGAAAAACTTACC
CTGATTTCTGAGATCAGTTTCCTGGGTAACCGGTAACTCTCTGGATATCGAAATCTGATA
ACCATTGGCAAGAGGCGACGATAAAACAACATTCCCGCCAGTATATCCGCCAGCCCCTGT
CACCGTGTAATCAGTGTCCAGTGTTAAGTCAGTGATGTTTTCGCTCAGGTCAACAACCTG
CACCACCAGATCAGACTTATGAAAAATTCGGAAGGTATAAGGGAATGATGTCGTGACCCC
GTTACCTGTGTAGTCATTGTGGTCAACTTCGGTTGAAACCGTCATGTCATTTTCTCCAGA
TTGCTTTTGCGCCCGGCGCGCATGCACTCTGGATCATTCTATTACCCAATAAACCTTATA
TGAATCGTTTAGGTATTAATCAGTTGCTTTATTACCTTACAGGTAATTTACATTTCATGC
TGGATAGTCCTGATATCTTCTGCTACTGTATGTTTATACAGTGATTGCATGGAGAAGAAG
AGATGCAACGGCAGTATCACCATCCGCTGGAAGAAGGATTTGAGGAAAGAATACACACGC
CGGTAGGCGTTAGATCCCTGGTGGAGGAATCGCACCTGATGAAGTTGCTGCGGGAACTCG
ATAAAGATGGCTTCAATGTTGATGGGCCACTTGCTGAACTGGTTGCTCTTGTGAACTACG
TCACAAGTTCTCAAATGACCATGCAGGATCTGCAAACTCATCTCGATTACTGTGCGGAAC
AGTTACGTAAGCAAACCACTTAATGAAAAATAAAAGGCCGCTATTGCGGCCTAGTGACAT
GTCACACTCATGCTATGACAAACCTATGTACCCTGCTATACCAGATAATATTAAAACAAC
TGCGACGGCAAATTCCCCATCTTCAATGATACATTTACGGTTCATTACGACAAGCGCGAC
AAGTGCCAACACAACAAGAATTATAACAATCATTTTCGCATCCTTATTGCGGAGTAACAT
CCTGAGGTCGCCACCAGTATGTCTGGTTAAATTCTTTCTTCGAACGCTGCTCCATCTTAC
GCAGATAGCCAGGGGAAAAATATTCTTGCATCTGATTAAAGATCATATGATCAAGCGCAG
CCTTCAGGTACCAGATGTTGGCACCAGGTGTCAGACCTTTTCCAAGCTTAACCAGATCAC
CACCAGTTTGCTCGCTCTTACCTTCTACCGCATTCAGTGGAATACCCTGGCCTATTTTGA
TAACGTCATCGACCAGGCCAGCCACCGGTCCGAGCATTGAAGCCAGTGCGCCGCTTCCGT
ACCGGGTGTGATCAGACAACAGGAAATCACCGTACAGGCCAAGACCGCCGCCTTTCAGCA
GAGCACCAAGCCAGAATTTAGCAGCATCTTCACCGACCATATCCCGCGGATTACGGCCTG
ATGCCATGTCATTTAGTTGCTGAGAAAGCGCGCCAAGTATTGTCGTGCTGGCTATAAACG
TCGCGATATAAGCAGCCCGCCCACCAGCAGAAGGCATACCCATAGCCCGCGACCAGTGGC
GCATCACGACAGAGATCGGGAATGACTTGAACAAGAATACGCTGCGGGTTAATTCACCTT
TCCATGTTCCGCGCTGAATACCTGAACCGGTAACCATCTGCTCACGCGCGCCCGGAGTTA
TCACAGCCATGTCAACTTCTTCGGTAACCGCTCCGAGTAACTTACGCATTGCTTCAAACT
TCACGCGCTCCGGTGATCCGAGGTGCTCTACAGCAGCATCGGGTATACGCATGATGCTTT
CCGGAGTCAGCATCGTATCGTTGCCTTTCCCCCAGTCCTCCTGTTGCGCCAGTTTCCACA
CGCTCCAGTCGGTATCGGTGATTCCTTTGCTTTTCAGTATGCGGAAATCGTCATTAGACA
GGCTTTTCAGATCCGGCGTTCTGGTGACAACATCACCAAGACTGCCCATCATAGTGACAC
CGTAGGCACGCTTGTGCGCGTCTGACCACGCAGTTAATCCACTGGCGCGCATAACCGCAG
TTGCAGCCCACCGGGAGACAGACGGTCCCATATTATCCATCGCCCAGCGGTTAACGCTGC
CGAGCAGTGATTCCATAGCCAAGCCAGCACGACGAGCCCTGGCCAATTCAGTGCGATTCG
TTGGGTCCATAGCTTCAAGCTGGTTACGGAATAGCTGATTCATCGGAAGGTTGGTAACCT
TCGCTGACAGGTACATGGTTCCAAGATCAGAGAACGATGACAACAGAGCAGAACCGAGAC
GACTGGCAACCATCCAGTTGCGGATGTTATCCGACCAGCGCGCAATATGCGGGTTTGCAA
CAGGCTGAGTTTTACCAGAAATAAAGTTATACAGGTTCTCAGTATTGTTTGCCTGGCGCT
CTATACTACCGGTATCCTGCGGGTTAGCCGTAGCTGTCTCTGATTTCGTCTGATCCAGCA
GTGAGCGGAACACATGATCCGGGTTTGGTCCGTAGGTTTCCACCAGCGCAATGTCTTTAC
TGATACCTTCCAGGTGCCCTACCATGATTTCCCAGAGTGACCGGTCGCCGTACATCTGCT
GGTACTGAAGGTATGAATCAGCGTCTTTAAAGTGGATTTGGCGTGAGGCGTTGCCACGGT
TTGCCCGCGCACCGGAAATACGCATACCGGTATCAGTGAGTTTATTCAGGCCACCTGTGG
CAATCGTGTTATAGGCTTCACCGAGAAAAGCTGATAACTCAGTATCATTCATCAACTGGC
CGTCGGCGCGTGTGTAATATTTGCGATCGAGTTTACCAATCACATCACTTACCCACTTAT
CCTTCGATACCGCCCCAACCTTTTCCATAGAGTGGTGCTGTGGTATACCCCAGTTTTCCA
GATATCCGATATCACCACCAGCATCATTAAACCTGCGGCGCAGTAGCTCAGTAACTTCGC
CCCAGGCTTTAGCCCCTTTCATGGCTTTCGCATTGCCAGTTTTCTGGCCGCGCATCTCAA
ACACCAGATCACGGACTCCGGCTTCATCTTCAAACAGACCGAAGAAACGAGGATCAACAG
CCTCGAATACCTCCTGTAACTGGCTTAATGCGTAATCACGGGTCGCTTTCGTGCGTGACT
CAACAGACAGAAAGTTTGATTTACCGTCAGCGCTGAAGGCGATCGTGCGGTTGAGTGCGC
CTAGCTTTCCGTCAGCACCCTGATAACTGTTAATGAAGTTGTCCAGGCGCTGACGCGCTG
CGATGGTAAGCGCGACACGGCGTTTTTTCAGTGCCACCTCTCGCTGCAACTCTTCAGCCG
CCAGTTGCCCGGCTCGGCGCAGGCGTTCAGCGTCGTTAAGTTGACGCCATGACATCGGAT
CGTCACGGGCAATAGATCGCATATTGCGGTAAATGCGGTCTTCGATATTCTGTATTTCTC
GGGCTGTAAGAGTGCGCTGTGCTGCCTGTTGCACGGCCTGAATACATTCCTGTCTCATTC
AATTATCCTCTCAAGAAACACGCTACAGCCACGTCAAAAAGGCTGGAATCCTGTACTGCC
TGCTCATTCTCTCTGCTCACTTCGTCCAGCACTTCCCGAGCGCTGCGCGACTGTGGGTTT
CCGTCATCATCGAGAATGGTGATCATCATGTCAGGTGACTCAACAAGCGAGTCTTCAGCG
ATACGCAGATCCATATCTCCGGCCTGTTCAGCCGTTGGCCTTTGCTCTGCATGTCGCAAT
ACAGCACCAGGTTCAAAAGGTGCAGCCTCGTCAGGAGTCCGCACTTCTGCTGTTTTATAG
AATGACATGGCCTGTGCGTTAAGATCGCTTTCTGCCTGCTGGCGTCTGGCTAATTCAGCC
CGCGCTTCAAAGTTAACCCCTCCCTCAACATTCGCCGCCAGATTATCCTTTGCCGTCTGT
AGTCTGACCGACTCGTCATTGATACGCTGGTCAATATCACGCAGCCTTTCCTGACGCGCT
GCACGTGAACGTGATAATTCACGTCCGCTGCCTGAAGGTTGTTCGTTCAGGACTCCTGAG
CGTTCCTGGTTGAGTGTTTCAATGGATCTCTCGATGCCAGCGATATCAGTCTGCAACTGA
TTAACCTGCTCAACGTCTAAAGCCTGAGCCGCTTGCTGTTCCAGCGCTCTGGTATCAACA
GCTATCTGAGTGCTTCCTTCTTCAGAGCGATACAGGGTTTCATCTATGGCCTGAGAAATA
AGGTTTCTCCTCCCAGGAATATCGCTAAATGATGCTGGTTCGGCAATGCTGGCCACATCA
ACTGCACGACCCTGGCTTACATCGTTCATTGCTTTCTGTAGCGCCTGTATATGCGCATCA
CGTGACAGAACATTAACCGGAACACCAGGAGCAACATCGATCTCAGCGTGATGTGAGGCA
TTTGCTGCCAGCGCTGCATCCACCTCCGCTGGGGAAAATTCAGGAGTTGCAGCGCTCTCA
CCGCGGGCGTTCAGGAACCTACCTACACCACCAAATGCCACACCAAGAACCGCATCGATG
GCGATAGACTGGCGATCAAACACATCGTACTGAGCCGCCATTTCGTTATAACCACCATCA
CGCAGCGTCTTTGCAGTCAGCCCACGCTGGGCCATCCCAAAGGCAATGTTAGTTCCGGCT
GCGTATGCGATATCTGGAGCAGCGCGAACAGCAGTAGCTGCAACATTACGCACAGCACTT
TCACCTGTCCTCGCTAGTTGTGCGCCAACACTTTCTGCCAGCGCACCACCAGCGCGCAGA
CCGAGGCTCATAGGGATCAATGTACCAGCGCCAGCAGTGACACCCTGCACCAGACCAGCT
TCCTGAGCGGTCCTGAAATCTACGCCCTGAGCAGTCAATTTCTCAAACTCAGAGAAGCCC
TGCAGTGCAGTGACGGCAGCAGCACCACCGGCTGGACCGGCCAGCAGCGTACCAACGACA
GCCTGCCCGCCCATATCGAACAGACCATTCAGTACCTGACCAGCAGTTCCTGTTGTGGCG
GCGTCAGGAGTCAGGCGCTTAACTTGCTGCTCTGCGAGTTTTCGCTGTTCGCCGATGTAT
TCAGCCGATGTATCATTGATGGAAGTGTTTTCGTTAACAAACTTAGCGATGGGTGAAACG
ATCTTATCCATTCCAGCCCAAAGAAGCTGGTCTGGTTTGGCAACCAGTCCAGAGTAAAGG
CCCGAAACAGCAGCAGTACCTGAGTTATCGAAGAAACCGACATCGGTATTAAACCCTGCT
GGGTTAGATGCCGCTTCATCCAGTTGCTGATTCTGGTTAACTGCGTTGAGACCAAAGTAA
CTCATTGCGGGATCCCCTCTGAGAATCTCTGGCGCTGTTGGGTAAGGTCGATGACGACAG
GAGTTCCATCATCTTTCAGCAAATACCCAGTGCCGAGTTTCACCAGATACTGGCTATCTC
CATAGCTTTGCAGACCGTACTGGCCTGGCGGTGCTTTAATTCCTGCGCCAGTCACCTGAG
TTTTCCATGCCTGATCAACTTGTTTATCAAATTGTTCGGCAGACATCCCCCAAGGCAAAA
GAACACTTCCCATGCCGTTATAATCGTGCACGCCACCAGTAGCTACGTTAACAGCCTGCT
TCCATGTGTCACTGTCAACTTCACCCGAAACCACACCCTTCTTCGCCATCACCCCAGCGT
AATAGTCCTTTGCTATCTCATAGGCCATTGATGCACCCTGCGCGTCACCGGCAAACGCAT
CCTTCACCATGTCAGAAAACTCTAGTCGCAGATCGTTATCCTTCGGCATTGGTATGCCCT
TAGCATCATCAGTTCCTTTACGAGCCGCGGCACCGGACAGGATGGTTTGCGCTGCTGTTT
CTGGTGATACAGAAACATCAGGGTTAAACCAGTTTTTCTCAGCTACCACTCCTCCTGGCT
TATCCATCAGGATCCCAGCTACTGCTGCTGATGGCGCATTGGTGCTTATCTGCTGAAGCG
CTGACATATATACCTGACCGCCCCCGGTGCTCTGCCGAATGGTGTCGAGATATGCAGTCT
GCTGAGAAACTGGTGCATCGCGGAAGAAAGCCCCGATCTGATTCGCCTCTTCTTTGGAAA
AGAACGTCAGCGGCGTACCGTATGACTTAGCCAGATCTACAGCCTGAGAAGCCCGAAGGG
AAATCGTCTGGCCGAAATTGTTCTGGTTGGTCATATCAATAGGCTTTGTTTGACCGGAAG
AAAGTGAAAACTGAATTGGGTCTGCTTTACGTTGCGCAAGAACAGTACTGGCAGCAGAGA
CAACGGCGTCATAGGTTTGGGCGCGCGCTGCATATCCTTCGCCAGTTTCACCAGTATCTG
GCTTCAGATTTTCTACTGCTGCCTGAATGCTGCTGGTCGGCATGTTGCGAAACGATCCTA
TGTACTGCCCTGCGATCTGCGTGTTGCGAAACTCGGTATAGCGTAGATTTCCTCCCGCAC
GCCGTAGGCGGCGAGGAAGTCGTTCTGCGTAGGCGCGTTCGGGAAATCAACTCCGCGCAT
GTATGCCGCGCTGGCATCGCGTACGCGGCTGTCGATATTGGTGCGGTATTCAGCCTGCTG
CTGTTTACGGATCTGGTCAGCCTGGCGAAGGAATGTCGCCTGGGCCTCCGGAGATGCTGC
ATCGAATGCCGCATTGCCGGTATAGCGCTTTGTGCTGGTTGGAAGTTGAGAGAGGCCAAT
TGCCGCGCTAACACCGGTAGCAAGTTGCTGATCGCTGTACGGCTGACTGCCGTTCTCATG
TTGGATAATGGAGGCACACAAAGCCTTTAGCGTATCAGGGTTTGAGGCATCAAGCGGCTG
GTCAGGCGTCACACCGAGTTGAGCACATACTGCCTGAATATAGGCGTCAGTGTTGTTATT
GTCAGACGGCGGTGCCCAGCGATTAATGATGTCGTTTACAGTATCAATACCCTGTCTCTG
GTATGACAGCAGGTTGCGTCCAAGCGCCCGAATGCCGTGTTCTGGCGTTTCGAATTTTGC
AAATCGACCATCATCACCGGTCTGGCCCACCCACGGATTGGTTTTGCTGTATTCGAGGTT
TCCTGGGTTGTTGTTGCGAATGCCACGGGCGCTATCACCAGAACCACCTTCTGATACTGC
ACGGCGGGAACCAGTAACTGTATCGCTTAACTCGCCATTGCTCTGGATGAACTCGATCGA
ATTATTTGCCGACCACTGAGAAAGGGAAGCATCGGCGACCTTCTCTTTGAACTCAATCTT
TTTGGCCTGAATCTGTTCAGAACTCCAGCCATGAGCGGAGCCATAATCTTCGATCTGCTG
GAAAGTCTGCTGGTTGTAGAGAACATAATTGGCATTATCACCATAGGCGGCAGCAGCCAG
TTTTCCGTTGTTCGCCAGAGTCGCCTGGAACTGACCTTCTTCATAGGCATTGAGTTGGCT
TATCTCATGCCTGCCAGCCTGGGTGGTGAACTGAATGCGCTGCTGCTGAGCCTGCTGTAT
AAATCCAGCCCGGGCACCTTCCGGCAATGTCATCGCGATCTGCTCTGCCTGAGCATCGAA
TTGCTGGGTATAAACCTGCCCCTTGCCAAGAGCGTTCTTACCCTGCATGTTTAGAAGCCC
GGTATCCGGGTTGGTTAGCAGATCACTGGAAATCTGGCTGAGTTGCAATGATGCATCCTG
AGCCTGAGCAACATCCGCGCGCTGTTTTGCCTGAGCAAAAACATCAAGTGCTTTACCACC
AACCTGCGTCAGGGCATCTCCGATATTTGGCTGATCGAATGCCTGAAAACCAGGAGACTG
AAACCCTCTGCTTTCGACCTGACGACCGGTGACTGTTGGTACTGTTGGCATTTCTATGTC
TCCTTATCGACCGGTTGGTGTGCCGATGGCAGCGCTGATCGGTGCCGCTTTGCTTTGAGT
GAATGGTGACCACGTTCCGCCGCCCATCTGGTAAGCGCCGTATGCCTGAAGTGGAGCAGT
CAGCAGTGTGGTAAATGCGCCCATATTCCCCTGCTTGCGTGCTGAGCTGGCCTGAGCTTT
GTAGTTTTCAGCCTGAACCTGAAAGCCATATGCTTCACGCTGAGCGTTATTAACCGTAGT
CAGCGCATCAAGCGCGCCAAACTGAGCTGTATCGCCAAAGATATCAAGCGCTCCACCAGT
GGAAAGATCTGCGCCAGTTGCGCCCATGGTTGCCGCCTGGGTGCCAGCAGCCTGGCGGTT
ACGACGACGAACCTCATCAGCCTGAGCATTACCACGGTTGATAGAATCCTGTGCCTGTGC
CGTGGCCACTTCTGCATTTTGCTCGGCTACAGCAGACGAATACTTACCTTGCTGGTACTG
GTTGTATGCTGAAACGCCACTTAATGCGACACTGGCGCCAGCGAGAGCGATAGCCGGGCT
GCACATTATTTTCTCTCCATGTGGAAACGGTGAAACGGTAGGTTTTTAATGCCGTATGGC
TGAGGTTCATCGATGGTGAATCCCAGCCAGTGAAGCCAGATGCGCGCTGTGTGGTTGCGT
GCATCAACATAATTTTCAAGATACGGGTAAACAGTCAGCATTGCATTGACCACTTTTCCG
CACCGACGCAGGAAAGTACGCTGGTATTTCTCCAGCGCGTCAGTGCCCACCAGCCATGGG
ATACCACTGCCGCCGATCATCGATGCCGGTGCTACGCCAAAGACAGTCACTACTTCACCG
TTAATCAATCCGGCACAGCAAAATGTTGACGTGCGTAGACCGGTCTCCAGCACGCGGCGC
GGACTCCAACCGTTGGTTGCCAGAAACTCATCGATATCAGCCTGGCGAACAAGCGGAATA
ATGGCTTCGATATGCTCTGCTGTAGCGGGTACGATCTGAGCTTTAATCATCAGAAGCCTC
CGACGGTGAGGCGAGGCAATACAGCAAGAACAGAAAGCGGGAGTGGGTCAAGCTGGCGAA
CCTTAACGCGTCCGTTTTTATCCCAGTTGCTGTCGAGTTTCACTTCAACCTTGCCTGTAG
CATCATCAACAGGATCGTCGTAGAACTCAAATTCACGCTGCGGATATTCATACCAGGTTC
CGCCAGGAGTTGTTGCCCAGATTCCACGGCTTGCGTTGACCACCATCGTGACAGTAGGAA
TGACCTGCTTTTTATCCAGCAGTGTTTCCTGCCCGTTGATGTTGATATCCAGTGTTTCGA
ATTCAGCGGTGATAGGCAATCCAATATGCACAACTGCACCTGGTGACTCCAGCGTGACTG
AGCCACCAGTGACAACCTTCTGAGGCTCAACGCTCGCGTCTGAAAGAATGTTGACTGTCT
GGCCTTCGAGATGCGACAGTCCGCTGAATGTCTGGCGCGCCATTTGCCAGTTAGTTGTGG
CCACATTGCGAAGCGCAGGTGGCACGTTTCGATTGAATCGGACGGTAACCGCGGTATTGC
TGGTTACAGAGATGATATCGCCTCGCAGCTCTTTAGCCACCGGTTCGTTGGTGTCTGGAT
CTGTTCCGGTATATGGGAACTGAATCTGAGCGCCTACATCAGTATTAACGAAATACGCAC
CACCGCTTACTGTAACCGGGTAATCAACCTGATAGTTCCAGTCACCGGTGCCTCCACTGA
TGGTCATTGTGCGTGATGATGTATTGCGCCCGTCGTAGCTCAGTCCGCAGTCTACAAAGA
ATGCGTCTTCATCATTGGTGAACAGGCGACTGGAAAGGCGTTCGATGTAACGTACGGTCT
GCCCATTGATATTACGGTTAACCACGAAGTAAACAGCATCCTCGCTGCCTTCACTGATTG
AGCATGTGCTTTCGTACTTCCCGGAGCTGGATTGTGGTGCCCATGCGAAAACCTGCTGAT
CGCGCAGATAGGTGAGCACCAGCAACTTGCCGTCATCCCGAATGCAGAAAGCGCTGCTGT
ACGGCACAATGCAGAATGACCAGTCGACAATGCTATGCTTCTGGAACAGGTGGTTTGCCA
GTATGGTCAGGTCAGTTCCCTGATATCCGTCAACGTCGAAAGAGTAGGCCAGATCGCGCA
CAACGCTGCCTTTCTCCTGGATGAACAACGCGATATTGGCCACGGCGATAGGTGGTACGT
TACTTGATCCGTTATTCCCCTGAGAGCTGAACGAGAACGCCGATGGCGTGAGGACCTTAT
TCTGGTCCCCGGATATCGTATATTCCCCGCCAGATGTCAGAGCGACCAGGTTACCAACAT
CAATAAGGTGACGGATCTCATTCACCTGACGCCCTGCGTAGGTGTAGATGATGCGATCGT
CATCCTGAATAGGGTTGTTCTTACCGAAGTCTTTATAGTCTCCGGTGCGGCTTGCCCAGA
TGGTTTGTGGATATGCGGTAGACGCGGCAAAGTACAGGCGCTGCTGGTAGTAAACAACGG
TACTAGGGTAGCCGTTAACGCTGTTCCACGCATATTTCGCCCACTTATAACTGGCGTTAG
CGGATCCAACAACCTGAGATGGAATGAACGAAACCACATCGGCAGTTGCTGTGAGGCCAT
CGCCAGACACTGCTGTTATTTTTGCAATGCCGAAACCGCTGTGCAGGTACTCCCACTGGA
TCCCGGTATCATCTGATCCGGTACCGCCCCATCCATCCCAAGACATACCTTCAGTGTGAG
ACGGGCGAAGGGTCCCGGTCTTACCTGCAGTATTCGCGCGGTAGTAGTTGCTGTCTGCAC
GACGAACGTCGTTTATTGCTGTGGTTTTACTGGTTTCCCATACTGGGACGGAATCAACCG
CGGGCTGCTCGAGATAGAACAGTTTTCCTACCTGTTCAGCACCGAAGATTGCAGAACTGG
CCGTTAGTGTAATTGTTCCGGTGCTGGCGCTGGCGTAGACCTTCACAGTATCGTCAACGT
TGATATCTTCGAACGGCCCGTTTTTGGTGGTGACATCGACGATCTGCCAGTTGTCGTGCG
CATAGCGGCGCAGTTCTTTCGGAGGGTATGCGGGATGCACCAGCGTCAGAACGTCGGCGC
TCTGCGTGAATTTAATACGGAAAAGGTCAGTGTCAGCATACGGCATCGCCAGCTCATAAA
TCACATTGCTGGTCGTCAGAACATACTCGCCGTCTTTGATAACGCGCATATAGTTGTGCC
CGAACTCCAGAGCATAGGTCTGTACGGTCGAGAACTGGAACGGGATTAACCGGCACTTGC
GATCAGGGTATTTAGCAGGACCAACAAAGCGCGTACCTGGCCTGTTCTCTACACCGCCAT
ATTGGCGAACAATGAAGTTATCGCACTTGCGCAGTGCCACCTGATACTTTGACATATCAA
TGCGGCCATACAGTGACGGACCAATTTCACCACCGGCAAAGCTCGGTTGAATCCAGCTAA
AAGCCATTATGACAACCTCGCTGCTGTGAACTCATCTACCGGCGGTTGTGGCTCCTGTGA
TTCGTTCTGGCTATGTGAGCCAGCGCTCAGGATCACACGGTTGTACATCGTCAGTGCATT
GTTACCGAGATCTGCGCTACCGGTCAGCGCCATATTAATTGCAGCAGCCAGACGCCAGGA
AAGCGCCTCCATAAAAATGGCATCATACATATTGACGTCAGTAACCCGCGCCACGTACTT
CAACCACGCTTTCGGCTGATCGGTGTAAATGAGCTTACCTGTCAGTTCCTCATTGGAACC
GACAACATATTCAATGCGCTGCGCAGCGGTAGGATTACGTATGCCGGTCGGCATGATCTC
AGTTATACGGACGCAATCAGATGGGTACTGGTAAGCGTACTGCCAGTCAGGAGGCGGGTT
ATTGGTATCAGCCAGCGCCACGCGTTTGGTAGCAAAGTTCCAGTCGAAGTCAGCCAGAGC
AGCATCACGACATGCATCAAAATGCAGGGAGCACTGCCCGGCCTCTTTGCTGGCTTCATT
CAGGCTGTTAATGCTACGACTGTTGCCGATATTGCTCAGCGCGCGGTTGCAGATCTCGAT
AACAGAAGCCATTAATCATCCTCCCCACCGTAGAGAGTTTGCGCTGCTGACTTCGGTTGC
TCGCCTGATACTGGACTGAGCGCCATATCAGTGATCTGCAGACTGGCGTTATGCTGCATT
CCACCTTCCGCTTCGCGGGTAGAAGTTGAGCGAATAGTTGCCTTTGCGGTGATCATTACT
TCAGTGCCAGCAGATTGAGGTGCTGCCTTTAGCTTGGCTAACGTCTCGTTGTTCAATTCA
ATGCAAAGGCCCCACGGATAATCATCACGAGTCTGGGTTTTACCCTCCTCATCCTGATAG
GTGTCGGTGCCGGTTTTGAGGTTTACCAGATCCATAACGGACTCCTGCAATAAAGGGGCC
GAAGCCCCTTGTTTGATTAGCGAGGCTTAGACGCCCAGTTCGGCACGCTTTTCGGCGATC
TCTTTTGCCAGAGTTTCAGCCGTTTTATTGCCCGGCTTCTTGCCTAGTAAATCCTCATAC
TGCTGTCGAAGCAGAGTAAGGTCTTCACTTACCGCGCCAGTGCCATCAGATTTCACTTCC
TCCACTACTTGATGAACCGCAGCTGGAGATGGAACATTGATAACTACAGAAGCCGATCTT
CCTTTACGCTTTTCGGCGATCTCTTTTGCCAATTTCGCCGCATCGTTCAGTGGCTCCAGC
GCCGTACCTGGTTCGCCGTCATACTCAACTTCAGAGCCTTCTGGCCAGAGGTTGTTATGA
ATGTGAGATAAACGCAGGACGCGGTATCTTGCTTTTTCACCTGACATCGCTATCCCCTTA
GCCAGTCACTTTTGAACGAATCGGGTAGTACGGGCTGTTGTTATCAACATCCAGGTTAAT
TCCCGAGGTGAAAGCACCGGCCGTCAGCGGACCAGTACCGACCACATAGTTAACACGCAG
ATAACGCTGGACACCTGCCGGAACTTTCGCGGAAAACAGGCGCTTTCCAGCAGTCAACGC
CGCTAGCGCCAACGTGCCGCTATCGTACAGCGTGGTCCAGGTGGAGTTATCCGGGCTGGT
CTGCAACTGAACGTTCAGGGTTGCAGCACCTCCTGCGGTTGCAGTGGTATTCACGTTTGC
CCAGAACTCCAGCGGGTAACCAACTCCGATATCACGACGGGTACCGTCAATTGGACCGAG
ATCGATTACATCAGTAGAAGCTGCGGAAGCCGTAACCGCCTGCGCTTCGGAGAACATCAA
CAGTTTGTCGAGGATCATTTTCTTTCTCCATTCATGGGCCGGTTAAGGCCCATCAGTTAA
TAACAGGCGTTAAACAACTCGCGCTTCTGTTTCCAGAATCGCATCGGTTTCACGGATAGG
AATGCCACGGAAAGTGGTCCACCATTCGCCTTCTGTCTCTTTGACGGACAGAGCCAGAGA
AGCTTTATCCAGAGATTGCAGGTCGAGAGCCTGGGCAACGGTACGGTTCATGTAGAAAGC
CGCACGGCCCATCTTCAGGTTAGGAACGCGGTGCAGCGCTTTAACCATCTGCGTGACGAT
GTTTGCAGCAGAGGCAGGAACAGACAGATCGCTTACATCGATGTTGGCGATACGTACTAC
ATAGCGCCAGTCACGAAGAGTCAGGCCGTTATCCCATTTATAATGAGTGCGATAGCCCTG
ATATTGACCACCAGCAGCATCACGCAGAGTCTGCTCACCGAGATCTTGCATTTGCAGACC
AGCTTTCTGTCCTTTAGGGAAGATGCCGTGAACGGTGTTTTCACCCCACACAACCAGCCA
GATAGAAGTGTTATCGGTGCCAGTGCCGCCAGCGTCGATAATGTTCTGACCGTTACCTGC
TGATTTGCTGGAATAACGAGACGCCAGCCCCATAAACTGCTGTGGGTTAACGCTGGTATC
ACCATAGAACAGGGTCTGAGCCATCTTCTGGTTCATCGCCTCAAGGAATGCCCGGTCTTC
AGACAGGCGGAATTCAGCGGTGTTACCGTTCAGGTCGGCCAGAGACTTATCGATTTCGGC
ATAGGTTTCCAGCATACCCATGGTATCAGTCACCTGAGCAGTGGTACTTTTGCTGTTAGG
TACGCCATAGTTCAGAAGACGCCACGTCGCATCTGGAAGCCCGGTGCGTACAGTGGTTTT
ATGACCTGTTGGAGAGTTACTCTCCATGATCATCATGTCCAGAAGAATTGGGTTGGTCTG
GGAAAGCAGCTCGATAATCTTATCGACTTTCCCGTTCGGGTCGATGCGCTTGCCCCAGTC
TGCCAGCGTCAGCGCAGTTAAGCCTTTAACAGCCATGGTTATTTCCTCTCTTATTTGCCA
TAGAGCACTTCGGCAGCACTACGCTGACCGCTTTCTTTCCCGGTTACCATGCCGTCTTCT
GACATGGCCTTACCGACTTTTATGAAGGCTTTAACCAGCTCAGGGTGATTACCCAGGCCG
GTGCCTTCCAGATATTCTTTCAGTTCAGGTGTACCGAACTGAGCAAGAGCACGCTGTGCC
GCGCTCAGGTTACCGGTGAGATTGTCTCCGCCGATTTCCTTGTCCGCCTTAACGTCAGCA
GCCCACTGTTCGGTGGTTTTCTGCCAGGCTTCCGCCTGCTGCTGCTGGACCATTGGCATA
ATCTTGGTGCCGTACAGATCGACCATCTTCTGCGCCTGCTCATTAGTCAGGTTCAGTTCG
CGGGCGATAGGCTCGAACTGATCCAGAGCGGCAGCATCAAGTTCCTGACCTTCAGCTGGT
TTGAACTCGTATTTCTCCGGAGCGCCTTCCGGCTTCTTATCCTTGTCTTCACCAGGCTTT
TCCTCTTTTGGCTTATCGCCATCGATAGGCTTGTCGTCCTGAGGCTTGTCGCTTTCAGTG
CCAGGCTGTGACTTATCGCCTTCTGGTTTAGCCGGATCGCCAGCTGGTGCCGGATTATCG
CTAGTTGATGCTGCGGGTTCAGATGCAGCAGGAGCTGCGCCACCATCAGCAGGTTGCTCA
TTGCAAAGACGGCGATGCAGCAAACGATCAAATAAATTCATACGTTACCTTCTTGTTAAT
CAATGCTGATGACGCGTTGAACCCTGACAGATACAGAGGTCAACGTGATGGTCTGGCCTG
ATTCATTTGAAAGGCCGACCTGAATTCCGCTGACGGTGAACGGATCAAGTTCATTCATGG
TGAAACTGGCAAGTACATCGTCACGGTTACTGATGCTGGTTCCGTTCACCTTCACGCTTG
ACTCGGATCCGACGATGTCGCCATTTGGGCGCCTGGTCTGAATCATCCATTCCCTTGCCG
TTCCTGACGCACCACCAACGGTACCGTTAATACGGGTACTGAAAAGAACCTGGCTCGGCG
CTTCCTGAGCAGGGAATATAAGATTTCCCGAATTGATGCTGAGATTCGCGTTACCGTCAG
CAGCTTTAACGATCCCGGAAAGTGAAAAGAAGTTCTGAAAAGCGGCATCAGCCACAACCT
GAGATCCAGTCCAGTTAAATATGTCCATCTGAAATGTCTGCGGCTCTTCATCCACTGCAT
AAAAGTCTGCAATGGTCGAGTTACCATCGTTTCTCAGCCTGATCATGCGTTTACGGATCA
TTTGTCTTTCTCCTGAGACTCAGCGGCCATTTTCAGATACTGTTCAGGACAGTGCGCCAT
GACGCGCTGAAACAATGCCAGTGCCAGGTTGCGCTGCCCTTCGTTGAATGCAGTTAAGTG
CGAATCACCAGCGAAGCATGGTGAGAACACCTTTCCCTCTCCAGCATCGACCAGATAACG
CGGCGGCCTTGCTCGCTACCCATAACGAACTTGATGTCGTCGATATCACGCTGAGCCAGA
AGTTGCTGTTTGGCGTCAAGCTCTGCTTTGCGTCCTTCGTCGTCGATATCCATCATTGCT
GCGGTGCTCCTGCTGCATTAGCGATAGCAGTTAATGCGCTCGGGTCGCTGGTCTGCGTTT
CGCTGAGAGTCTTGGCCCCCTGCGCTGCCGCCTGACCCATAGCCATTGCCTGTGCCGCCT
GAGCCTGTTTAGCTCGCTCTTCACGAATACCCTGTACCTGCTCCTGCGGAACGATGACGG
TTGGCGATACGCCTGACATTTCAGAGAACGCGTCGATAGCCTGATCCACATCAAGCTTGT
CGAGCGCTTCAGGTTTGAACTGCGCCAGTTGCCCGATAAATCCAACTGTCTGCGACAGGC
TGGTGAGGCCGATAGATTTCTGAGCCTGAGCCATCACAGAGATGTACTCGATACGCAGCG
GCATACCCTGAAGAACGTCAGGAGGTTCGGGCAACATGTTCTTGCGGGCCATGATTGAGA
ACACGCGATCGATAAGCGGGTTAAGCGCTTCGTCATTCAGGCGCTCAAGCACCGGGCCAA
GCATCAGCAGTTTCTCTTCCTTCATCTCGATCACCGCTTCCACCGGCATAGATCGGGTGT
TGATTTTTTGCAGCATCATGAAGAGGTCAACGAAGTAGGCGCTGTTGATGGTCTGCCTAG
TGTCCTGAATGTCAGCCAGCAGGTCGGCGGTATTCGGGTTTACCAGGTATGCAGGTTTGA
AACCATCCTGACCGGTCAACACGTCGAGATATGTCACATCGCCAGGCAACAGGGAAACAC
GCTGATTCTTGAGCGATGTTGGGGCAACCATCGGCGGGTTAGTGGCTTTATCGATCAGCT
GAGCTTTGCGCTTCTGCTCAACCTGAAGTGCTTTAACCTGACCGAGTGCCAGCATACCAG
GGCAAGATGAGGCGTAAACGTCTTCGCCATTCACTTCCCAGCGCGGCGCCAGAATAGGGA
ATTCATCAAATCCGGATTCACGCAGCAGCTTGTCGGAGTCGCCGCCAGACTCGAAATAGA
CAGAGCGGTAAGGCTTGTTCTTGCTGTCCATCTTCCCGCTGTCGCGGTTGACGTTAGGTG
TGATGCAGTGGTTAACCTTCACCCACGTTTCATACGTGCCGTTTTCCCACATGCCTTTTA
CGGATGTGCTGACGTTATCCAGACCGAATTCCTGCACCATCTGGCGCACGGTCATGGAGA
ACTGGCGAATGCAGGTGTCTACGCTACCGCGCGGACTGTTAGCCAGGTAGTAACTGCCAA
TAGGGAAAGGCATTGTGCGGATCACGTCCTGGTCATCTTCCAGAACAGCCATAGCGCCGG
TGCCGAAAGTACCCAGACTTGCGTACATAACAGGCAGTGACTGATACAAATTCGATTTGT
TGAACACTTCGTTCATGCGGCGCTGCACGACTTCCAGCCAGATTTTCACCGGGCCATAGT
CCATCATGTCAGGGTCAGGCGTTGCCAGTTTGAACCACGGTCGTGCCGGACTGGTGATGC
CTGACATCATGCCGCTGGACAGAATTCGCTGAGCCATTGAGCCAGTGGGATCAACAATCT
TGGTGTTACGGCGATCATCACGGTTTACATCAGATGTCAGAAAGCGGGAGCCACGCGGAT
TGATGAAGTCACTAAGATCACGCCAATGCGATTCGAACGATGTGCGCTCATTCTTCAGCT
GTGCGAGCTGCTTCAGCAGGCGCTCTTTTTCGGTTTCCGCCATCTCTGCCTACTCCGTTA
CTGACCAAGCAGCGTTTTACCGCTGGTGTTTGCGGTTGAAGTGTCACCCTGCGCACCAGT
CAGCAGAGTAGAGCTGCGCCCTGCTGCTGCGCGGCGGCGGCGCTCTTCGTCGTCACGAGA
ACTGACAACTGCTGCATCCTGCTCCTGTGGCGCAGCCTGTACTTCTGGCGCTGCTGGCAC
TGATGGCTTGCTGCCGATACACATAGCAATAGCTCCGTACGCAATTAAATTATTACCAAT
TTAACCACATATGATTTATTTAGCGTAGGATATTGACACTTATAACATCAGATATTACCT
TTTAGGTAATTGGTTCGTGTGTTGAATTGATGAATTGCGGAGGTGGTTATGTAACCGCTT
GTGCAGTAGCCCGGAGTACCGCAGCAATAAATTGGGCTTAAAAGTAAAGGCGGTGGATAA
GCGGAGCATCATCTCCGCACATAACTAAAAGCGCGCTTCAGTGAATGACCTTTGAGCCTG
GTCGTTAAATCCAAACGGTGGAGTGCGCTTTCAGGTGTGTAGCAGTACGGCATATGGCAC
ATGTGCCGCAGCGGTCCGGATGGGTTCCCTTGATGCTACTTCCCCAGCCGGGTAGCCGGA
ATGTGCAAGCCAGTGTTAGGTAAGCACGGACAGACGATTCACCATCGTGGCGATACGGTG
TGACACCTCGGAAGAGACGAGGATGCAACGATGATAGCATTGGGGTGACCGGTTAATCCC
ATGACGATAACCGATACAGGCGCAGTGCTCTCTTCGTTGTGGTTAGCTCAGATAGGTTAG
AGCTCCATCCATGCTTGCCATTGCTGCATGGGCGGGGAATGGGTTCCGAAAGGATCGCCG
CGCAGGTTCGAATCCTGCACCACAACCCAATCACGCCTTAGGACCGTGATGAAGCGCCCA
TAAGAACAATGCTGTGTAGCCTTTGGCGGTGGCAGTTTCCCTTGATGCTGACCACCGTCA
CTTTTACACCAGAACGCCATTGCGATGACGTTGCGCTGTAAACCCGTAAGCCATGGAAGG
CACCCTTGCTTCCATTTCGCCCGGTTCGTCCGGGCATTTTTTTAAGGTGATTAGAATGAG
TAAAGACCTGTTCGACATGAAGCGCCTTCCGGTTGACCGGGTTGCTGCGAGAGTTGTTGG
TAAGGGCGTTGATTGGACGCCAAATAAAGTTATTCAAACTGGTGACAGCGATCTTCCGTT
GCCAGTATTTCCTGCATATAACATTAAAAACCCGCAACAACGACGCGAAGTGCAAGCAAT
GATCGGAAGAAAGAGCGGGAGATTGACAATAATTGGTCTCGCGGTCACACAGGGAGCAAA
AAATAAAGGGGCTCGCTATGTTGCTCGTTGTGTTTGCGGGATTTATACGTATCGCAGAGC
AAAAAATTTCAAGAATAATTCTGATGATTTTGACGGATGCGAGCGCTGCAGAGAACTGTT
GTTTCTCAAAAGGGAAGAAGTTAAACGCAGAACGGGAAAATGGGTTGACTGGAAAGAGCT
GATGTAAGACTGTGACACGTCACAACTAGCCCGCCGATGCGCGGGCTTTTTCATGCATAG
GGATCGTACTCTGTGAGAGCCTTGCCCTGTTGGCTCTGTTGCTGCCCATAGTTAAACTGT
TTTTTGGTGACCGGCGCGGCATATGTCAGCACGTAGGCGTCGGCATCGTTCGGGGATCTG
CCAAGCAACTCTTTGACTTCTTCCTTGTCCTGCAAAATCTTCCTGCTGTCCTTCAGCCTG
ACCTTGTACTCCGGCGCACTCAGCTCATCGGCAAGGTTCTGGCTATCCAGTTGCGCCCCA
AGCTTCAGTGCGTCGCGGGCTGATTTGTACATCTCCCCGCGCTTATTGCCCATCTCGGGA
TCCGCGGTACCGCTTCCGAACTGAATCAGCGTCCAGTTTCGCCCCCAGTTATCGCCAACT
GATTTAAGCCCGGTCCCGTACCCGTAATCGATAAACACAGCATCGGCCTGGTACTGGTCC
TCGAAGTCGGCAATTATTTTGGCAAACAATACGTCGTCAGTGGTGCGTTGCCACTCCCCG
AGTTTCTTACAGTGCAGTCCCTGCCGAAGATAGATAACCGCCGGGTCTTTACCCTGGTGA
GACGGGTCGACGCCAAGAACTACAGCAGCGTGCTGAACCTGTGCCGGAGTAATAACCCTG
CCAACAGCTGGCTGAGTCAGGCCAGACGGAATGAACTGGTTTTCAGACGCATCAGGGAAG
ATCCCGCGCACGCGAACCTTCACGAAGTCGCTGTCTTCGCCGTAGTCGTCCACCCACTTT
TGCAGTTGCTGCTTGTTGGTGCCTTCCACGGTGCGGCTGTCAATCTGCGCGCACTTCCAG
CGGTGTTTGTACTTGCGGAAACATTCACGGAAACGCCCGGTGTTACGCGTCGGGTTACCG
AACGCCACCCAGATGATTTCGGTGTCTTCGTCCGTCAGCGCCCCTTCAGCTACCTCCCAC
ACCAGATCGGCAATGTTGGATGCTTCGTCGAATACCACGATGATGCGCTTGCGCTCGTTG
TGCAGCCCTGCGAACGCCTCGGTGTTGTGTTCAGACCATGGGATTGCGTCAGCGCGCCAG
CGTTTATCGTGACCGGGATCGTTGCTGTACATCGCTGTGGCGGTGCAGGTGAACCACTCT
TTCGTAATAGCCAGGTTCGACCATTTGATGATTTCCGGCCATGTCTTGGTACGCAACTGA
TTGTCGGTGTTGGCGGTCACCACCACCTTGCAGTCCTCGCAGGTGGACATGCCCCAGTTA
ATCAGCATCGAGATGAAAGCAGATTTGCCGATACCATGGCCGGATGCGCGCGCCAGCATC
AAAGGCTGGTGACGCGTCGCTGGGTTCTGGAGGTGATCGCGTATCTCGCGGAAGGCGTCA
GCCTGCCACTTTCTGGGACCTGTGGCGTGCGCCAGCTCTGTGCCATCCTCTCCCCACGGA
AACGCGTACAGCGCATAGCCCAGCGGGTCATACGTGAACGAGGCGATATCCTCAACGAGC
TGCTCTTCCGGCGACATGGCTTCGGCTGTCATTCTTCACCACCAGCCCGCTCTTTCACGC
GACGGCGGGCCTTAGCCATGCGGTCGGCAATGGTGACGGTGCCGGAAACTTCCAGGCGCT
CTTTGAACGCATTGACGTCGACGTGCTTACCAATCAGCTCGAGGTTCTTCACCTTGTCAG
GCCATTTGATTTTCTTGAGGATGGTCTCGATTGATGTCTCATCCATGTTCATGATGGTAG
AGGACAGGTCGAAACCACTCAGTGTGGTGCGCCATATCTTCGGCCACTCGCGGATAGGCT
TCAGGGTGCCATCATCGTTCAGGATGTCGATCACATCCATCTGGTCGATTTCCACCAGGC
GAAGTAGCACGTAATCAGCACTGACGCGCAAACGCTTGTTGCGTTCCTCCATCAGCTCGG
CGATCCGTTTCTGGATGCGCTCATCACGCATCATGACACTGGCTTTAACCGCTGCCGTAT
TAGGCGAGAACCCTGCGTTAATCGCCGCCTGCGTCTGATTCTCAGGGCATTTGGTATATT
CCTGCGCATAAGCCTCCTGCATCGCTGTTAGGGGCTTGTACTGAGTTGATTTTCGTTTTG
GTGCTTTTGGTTCTGCGGGCATTGTTACCACCGAAGTAATAATTACCGTTTTGGTAATAG
TAACACGCAAAACAAAGCCGCCATAGTCGGCGGCCATTGCAATTTATTGTCGATATCGTG
ACATGTCACACTGATAATTTAGTTTCATGCCAGCCACGAGTTACCCAACATGCCGAATCA
CCATCGCACGGACACGACTTAACTGGTAATACATCGCCGCATTTTACGCAGCGGTTAGCA
CTGATTGACTTGATACGAACACGAACGCGGGCATTATCCTGACGGATAAGCAACGCGATG
TACTCGCTCATATCATACGGCGCACGACCAGGGCGACGGGCGGCGCAGTTACGCGCCAGC
ATTTCCATTTCCTGCTCGTCGAGTTGCAATTCCATCTTGCGGTTACCGGCTTCAGCCAGA
CGGGCACGCTGCGCGGCTTTGCGTTCTGCTGTGGATTTAGCCACGGATAGCGCTCCATGC
CAGATTAATTAATGATTCCCAGGCGATGTAAACCCTGATTCCTGCAGCCACGCCAAACCC
GATTATCATGGAGTAAAGCAGAGCGTCGCACTTGGACATCACTTCACCTCCTGCTGTGGT
GCTGCTGCTAAATGCTCGACACCTTTAGCCCAAATAGCTTTGATGGTCGTCCATGTGACA
GGAACGGTGATTTCAATTCTTCCGCTGCCGTCGCAGGTTTCGCAATCATCATCACCAAAA
CACTCTGGGCAGTTTATAAATTTCGTTTCTGAAAACTCACCGGACAACACACCCTTTGCG
CCGTTCTCAGCGGTTAGCTTCTTCGGCACTAGTACGTAACCATCCGGAGATACCGGAGAG
TTGCCAGCCTGAAGCATGGCTGCGCGGAGTTGTTGTAGTTCGGCCAGCGCTAGCATTACA
TCATCAATGACAGGCAACTCCATTTCATACAATTCAAGAGAATCCCTAGCCACACGGATA
AGTACGCTCAGACGCTCGTCTGTTAGGTTGTTATTGGTCATTTTTCATCTCCTTTAAGCA
TGGCGGCGCGGCAGTCACATTCGATGAGTATCGGCTCTCCCCATGGCTGAACGCCGCCAC
TATCAGCCATTCCGGTGTCGTTACATTTAGGACAAGGTACTGGCTCCGCACTAAACGATG
CAATCACTCCATCAATCACCTTCACAGCATCAGCCATTGCGTAGCCGAGATTGCCTCCGT
CACTTTGTGCTGCTGCTTTGCTGAGTATTTCGCTTATCTGGTGCAGGCGATCGAGTGATA
CAGGACCGTTCGCCGGGTGGTTGTTAGTTGTCATGGGTTAGTCCTCAGTTGTAACCAATC
GGATTAACTGCAACCAGAACGCCGTCTGCGAACAGGTCTTTAATAATGTGCTCACACGGC
TCGCCTGTTTCGTACTCTTCAACCAGGTACGTGTCGCCATCTTCATTGAGATAAACAGGA
AAGATGGAACCATTGATAAAGTAGGTGCCGTTGTTATCAAGAATCTTTGCTTCTGCAATT
TGTGTTTTCATTGTTAGTCCTCCCACTCTGTATCCCATTCAACCCAAGCGCCTTCACCAT
CAGCCTCGATAACACCCTGATTGCCACACTGCGGACACTTAACCAGGTCACCGCCGTAAA
GGTATGTCCCTGCCAATGAGCGACTGATAACTTCAATCCCCTTGCTGCACTGGCAGTGTT
CGCACGAATTAAGCCAGTCAACGCGATATAACACTGGCTCCCACAACATGGTTTTGCTCT
CACTTTGGAACAGCAATCTGCTCATATCTCCCCCTTCACGCCAATGCCAGCGGCGCTTTC
TAACAAGTCGTCAGCGGCCTGAATATCAGCGCCATCCAGCGATGCGCCATCAGCCGCAGC
ACGGAAACAGGTTTTGACAAATTCCTTCAGCCCCGCATTCTCCGCAGCCAGAGCATTACT
ACGAGCAAGTTGCACATCCAACTGCGTTGCCAGATCGCTAATCAGTTGTGCCACGTCTCG
CACATCGACGGCGCCGCATGATGCCTTCAGCTCTGCGGACTGATCATGTCCGCGCTTTAC
CAGATCACTCACTTTGCATTCCATCTTTACCCCCGCTTACCCGTATAAGTTATTGATTAC
GTTGATATCCAAAAGGATCATCGTTTCAGAACGTTTCGCAGTTCCAGCCACCACCTTTGC
TTTTCGGTATTGGCTTTAGCGCTCTAAACGTGAATGGGTACATGTCTGCGGCTACCTTGA
TTTTCACCCTGGCGTCATCAGTCCAGAACCCTTTCACCTCGTGCAATTCCATCTCTCCGG
TGGTTAGCATCACCGCGAAGTCCGGCGTGTAGAACGTGTTATCAGCCAGCCTCAGCTTGA
TGCCCTCAAATTTGTACCAGGCTACGACAGTGCCGGTTATGCGCTTTAGGTGTGCCGCAT
AAGCCTCTTCCGTCTTGTTCATCTGGCCTGTCTTGAGCCTTCCGAGCGCCTGCAACTGCC
TTTTCATGATTTACCTCTCAGGTAATTTAAAACCACAAACGAGTTAATTTCAATAGCAAT
GCGCATATTTTATTACCTTTTTGGTAATTCACCAGATGTAAAAAAATGCGCTACTGCGCC
GGTATTACTTGATGAGTCCCGCTGCCTTCCCTCGTCTGTATTCCTCCATAAGCCACTGTG
CCGGTGTTATCCCTCCCAGGGTGGCTGCGTTCGGCATGCATCCGAAACTTCGCCCTGGTG
GATGATAGGCGTTACCTGAGCCTGTTGGTGGTGTGCTCATTGGTTCTGGCTTGGCCTGTA
TGCTGAGTATTGGATCTGGAATCTGGTGACCGGATGCCACTTTTGCCGACCATTCATCCA
GCAGCTTTCGCGCATGCTTCTCGACTTCAGCCTCACTCAGTTGTCGCTGATACATCGCCC
TGCGGGTATCACACACAATCCAGTACATGACCGGGTGGCGCCACGGGAATCTCTCGGGTC
CACCAGGCTGGAGGCTTTTCTCTTTGGCGTAACGGTGAAACTCACCCATCACGTCTTCGA
TGCTGATTCCCAGCACCATCTTGCTGTCTTTGCACCACTTGATGAATTGCCCAGGCGAAG
GCCAGAACGGTGATTCACTGGCGCGGGCATGGCGCATTCCTGCCGATACCTGCTCACGGG
TACGAACACCACCTTCAGCGAATGCAGCGATCCACTGCTGTTTTGCCGCTGTCTCCTGTG
CCGGAGTCTTCAGGTTGGTCTGTTCTGCTGCCGGGAATAGCTGCTTAAGCTGTTTAAACA
GGGCATCCACAAGTCGCTCTGCCGTAATGTTCACAACGTTGTCGCTACCTGCATACTGAC
GGTCTGATCCGGTTAATTGGGCCATAGCCTCAGCGTCTCGGTTCTGGATGGCGGTAAATA
CGTTATTCACAGGAAATCCTCCCACGCCTCTGGACTGTTCCAGTGCGGTACGTTGTTTTC
AGGTGAGGTCAGTTTGTTCTGTCTGCTGATCTGCAGACGTCTGGCAAGTTTTTGCTCCCA
TTGCGCATGGTGGAAAGCCTTACCCTCGGCCATCCAGTAAACCCTGAACTCTGCAAGCTC
CTGCGGTGTTGGCTGGCAATCCAGGTTAATACCCTGCAGAGATGACACCCGGAGAAAATC
ATCCGATGGTGACCAGAGCTCATGCATGACAAATTTCCCGAATTGCCCAAGTCCACCAGG
AGGGACAAAGTTGTTAATTACGGCGTTGTTGGCGTCAGGTTCAGGCGGTACTAAACCACC
AGTTTTATCGCCCCTCTCCTTCTCTTGGTTATATGACTGGTTAACTGATAGGTTCTGCAT
CCCGTTTTTGGGATCATTCAACTTCCCGTTTTTGGGATCATTCAACTTCCCGTTTTTGGG
ATCATTCAACTTCCCGTTTTTGGGTATACTCCCAATTTTGGTAACATTACCGTTTTTGGG
TATACTCCCAATTTTGGTAACATTACCGTTTTTGGGTATGTTTAAAGAGAAAACCCGGAC
CCTTCTTGTTGCCCCTTTTCTTTCTCCTGTATCTGAAATTAACCCCATACCGATGAGCGA
AATCAGCCCTGCCTGAACCGTTTTTTTATTCAGGCTTGTGTCGGTAACCAGGCGTTCGAT
GCTTGGATAACACAGGTTATATTCATCGGCTCGATCAGCCATCGAGAGCAGGATGAGTTT
CAGTGATGAGCTGCCCGGATTTGTTTTCCATGCCCACTCTGTTGCGTGTCTGCTCATGGT
AAATACCTGTCGTCAGCTTGAATGTTGCAGGCTGGCTTCGGCCATGAGCTGCTTTATTTC
TGCCTGGCGGCGCAGGCTTGTGTTGATGGCGCACGTAACGCAGTGCCCGTTATAAACATA
ACGTTCACTGTCATGACCATGCTTACACTGCTTGCCGGTGTAATAACGCTTAAGACCTGC
CTTTGCAGCGTCAATACGAGTAATAATCTCCATTGCACAACCTCATTACCGTTTACTATT
ACGATGATTTTGATGCAGGAAGAAAAAAGATCAACCGTATATGGTTTTTTATTACCAGAA
AGGTGTTTTATGCAGGAAGGAGCCGCCATGGTATGACGGCATTGATGGGTTCAGAGGGAT
TATCGGTCGTAGAAGAAGAGCACTAATTCAGGTTTAGACTTTGTCCATTCGCGGGAGCGA
CACGCTTTAAAAAGACCTTCCATCAGACGCTTACCCGGCATCTTACGGCGACCGGTCAGG
TGCGTCTGGATGTAATGACTGGTGGTACCGGCTTCAACTGCAAATGCTTCACGCTCATCA
GGAGACAGCCCCAGCCAGTGCTTTTTGAAATCAAATTTTTTTTCGTCACTCATATTTTGC
TTATCTCAGCCTGTCTATTCATATCTGAATTATTACCTTTCTGGTGAAAAAATCAATGAT
TATTACCATTATGGTAACTTTACCTTTATGGTAATATTCATTTAAATTTAGAAGGTTAGG
TAATAATAAATGGGCAAATACAATAGCTATGAAAAGTATTTATGACATAAGACGCAAAAA
CCTTAACGAAATCATTCGCCGGGATTTCGATGACACCCAGTTACGCTTTGCAGAACGGGT
GAAGCGTTCGCAGAACCTGGTCAACAGGTGGTGTACTGGTATCAAAAATATCGGACCTAA
TGCCGCGCGTATCATCGAAGAAGCAGCCCGCAAAGAAAAGTTCTGGCTTGATGTCGATCA
CGAACTGGACGCAGTACAGGATGATATCTTTATTCCGGCCACTGAAGATGGAGAATGGAC
TGTAGAGAAGCAGGCCGCCGCCACGCTCAATGCCTGGATGAGAAAGAACAGTGAAATGAC
ATCCGAAAAGAAAGTTGCTGTTGCAGCTGGCATTGGACCTGCCACCGTTAACCGCATCAT
GAAAGCGGAAGTCAGCACAACCATCGGCGTTCTTTCCTCCCTGGCGCGCGCGTTCGGGCA
TGAAGCATACGAGATGATTATTCCCGTCGGCTCACCTGGTGTTATCGACTATGACCACCG
GATGTATGCAGCCCTGCCACAGGAAGAGAAAAACAAGATCACCTCATTCATCAACTTCGT
GTTTGAGCAGAACAAAAGCAAGTAATCCCCCGCCATTCTGACGCTTTACCTGCCCAATGG
CGGTAGGCTCACGCCTCACTCAATTACCAAAATGGTAATTTTTTCTCGTCATACCTATTG
ACACAATCACTTTTTGATCTGATTATTACCTAAAAGGTAATACAAGAGCGCATTGCTCAG
GCAGAAACCACCACTTCGTGGCTTTCCTGTATCTACTAGTATTACCAAAATGGTAATAGC
GAGGTTTGTATGCAGTGGAAAATCATCAACGGTTGGTACTGCGTTACAGCTTGCGGGCTG
ATGAGCTGGAAGTTCCGCACGCTGGGTGAAGCAATGAACTGGGTATTCGTCAGCAAGCTG
GCGGTAAAAACAGAAATGGATATGGGGGTGAGCAAGTGAGCGAATTAGCAATTATCGAAA
TTGCGCCGGACATGGCGCCAAGTATTTACGTAGAAAACGGTCTGGAAAAGTTCCTCGAAC
AGATCCGCGAAAGCGTTAAGGAAGTTCCTGACCTGAGTACTGCCAAAGGTCGTGCCCGCA
TTGCATCTCTGGCAGCACAGGTTTCTCGCAGTAAAACAGCAGTTGAAAAGCCTGGCCGCG
ATTACCTTCGTCATCTGAAAGAAGCCGTCAAACCTGCTGAGGCTGAACTTCGTCGATTTG
TATCAGCTTGCGATGAGATGCGCGATGAAGTTCGCCGCCCGCTTACCGAATGGGAAGCAG
AACAAGAACGCATCAAGGCAGAAGAAGCCATGAACGCGATGCACGTCGAAGCGCTGGAGA
TGAACATTAAGTTCGACCAGGAGCTGGCGGCCAAGTTCGAAGCAGATCACGAAATGGCAT
TGCTGATGAATGACGCATTCGACCGCGAAGCGAAGGCGAAAGCAGAAGAAGCAGAACGCC
AGCGCATTGCTCATGAAGAAGAGTTGAAGCGCCAGTCAGAAGAAAAGGCCAAGCGTGAAG
CTGAAGAGAAAATCGAACGCGAACGCGCTGAATCTGCACGTCGCGAGGCTGAATTAAAGT
TCAAGGCTGAGCAAGCAGAGCGTGACCGTATTGCCGCAGAGCAAAAAGCTGAAGCAGAGA
AGAAGGAAGCCGCTGATCGTGCCGAGCGCGAAAAGCAGGAAGCTATCGCAGCCGAACAAC
GCAAAGCCGAAGCAAAAGATGCTGCTCGCCTGGCTGAAGAGAAGCGAATCGCTGATGAAG
CTGCAGCGCGCGCCGCTGATGTAGAGCATCGTCGCGCTATTAATGCCTCTGCTGTTCAGG
CTCTGATCGAGCAGGGCATTCCAGAAGACTGGGCCAAAGCCTGCGTAGTCGCTATCGCTC
GCGGGAAAGTTCCGGCAACAACCATCAACTACTGAGGTGGCTATGCACATTCAGCAATTC
AATAACCTGAAAAAAATAGCCGCTCAGTTCAGCAGCGACTACCAGCTGTCATCAGAACTG
TATGACCGCCACGTTGAGCTGATCGAAGCAGTCGCTGGTTGCGAAATGGAAGAGTCATTC
AAACGCGCCATTCTCCGTGCCGGTGTTCGCTATGAAGTTCTGGAGGCGGCATTTGAAAGT
GATGATTTCGAAGAGCTGATGTCGTCATTCAAACGTGAATTGACTGGCGTCATCGCACGT
CTTGACCTTGCTGACCAGATCGACAGCAAAAGGAATGCAGCATGAATACCGGTATCTATT
TCGACATCAGCAATGAGGACTACCACGACGGTGACGGAGTGAGTAAGTCACAACTGGATA
TGGTAGCCAAGAACCCTGCCCTTCTGAAATGGGTCAAGGCAGCGCCGGAAGATGAAGAGA
AAAAATCGGCACTGGACATGGGTACCGCCCTGCACTGCCTGCTACTGGAGCCGAAGGAAT
TCGATAAGCGTTTCATCGTGGCGCCACAGTTCAACCGCCGCACAAATCAGGGAAAAGCAG
ACGAAGAAGCATTCCTGAAAGACGTTGCCGACATGGGTATGACGGTGATGGATGCCGAGC
AGGGCCGGAAGCTGAAACTGATGCGCGACAGCGCAATGGCTCACCCGGCGGCGCGCTGGA
TGCTGGAAGCGCCAGGACACTGTGAAGCATCGATGTACTGGAATGACGAAGATACTGGCG
AACTGTGCCGAATCCGTCCGGATAAATGGCTGAACGAGCACAACGTGATCGTCGATGTGA
AAAAGGTTGCAGACATGGATCGCTTTGCCCGTCACATCGAGGAATTCCGCTACCACGTCC
AGGACGCCATGTACCGCGAAGGCGCACTGAAAGTAACCGGGCAGCCACACGGATTCTTCT
TTCTGGCTGTGAGCGAAACCATCGACTGCGGTCGATACCCTGTCCGCGTGTTCGAGCTGG
ATGCGCCAGATGTTGACGCCGGGCATCAGTTATTCCGCCGGGATCTGAACACCTATCACG
AATGCCGCATCAGCGATGAATGGGGCGGCGTGGAAATTATTAAACGCCCTGAATGGGCAC
GAAAACAGGATATGTACGTATGAGCAACGATATCGCAATCACATCACAGCCAGGCGCTAC
CGTAGGGACAGCGGCTGCAATATTCAGTCCTGAGGGTATGGACCGCCTGGTACGTTTCGC
AACCCTGATGGCAGACAGTAAAGCAACCGTTCCTCAGCACCTGGCAGGAAAGCCTGCTGA
TTGTCTGGCAGTTACCATGCAGGCGGCGCAATGGGGCATGAACCCGTTCGCTGTTGCGCA
GAAGACGCACGTTGTAAACGGAACTCTTGGCTATGAAGCACAACTGGTTAACGCCGTCGT
GTCTTCTTCAAACCTGCTTTCAACTCGCCTGAATTACCGCTGGGATGGTGACTGGTCAAA
GGTGAATGGCAAGAGCGACAAATCACCATCACTGACCGTTACAGTATCGGCAGTACTGAA
AGGCGAAGCAGAGCCGCGCGAGCTTACCATCAGCATGGCTCAGGCAGGTGTCCGTAACTC
TCCGCTGTGGGAACAGGATCCACGACAGCAGCTTGCTTACCTGTGCGTTAAGCGTTGGGC
TCGTCTGCATGCACCTGATGTTCTGCTCGGAGTATACACCCCTGACGAATTGCAGGAGAC
AACACCGCGTGTTGAGCGCGACATCACGCCATCTGCGGCAACGGCTCAGGGCATGAACAG
CCTGATCAACTCAAAACCAGAGCAGAAGCAGGAAGAGCGTCAGCAGCATAAAGACGATCG
CGGTCCTGAAGAGATTTTGCACGCATTTTCCGGCGCGGCGATGAACTACAACACCCAGGC
TGACCTGGACAAAGCATACAAATACGTTGCCCAGAAACTGGCTGGTGATGATGACCTGCT
GGCAAAAGCAACCGATGTTTACACCATCCGTTGTGACGAACTGAACGAAGTACCGATGTA
ATCACCACTGCGGCGCCACGCGCGCCGCAAATGCAAGAGAGGTAATGATGAAAAGAGCAT
TTGGCAAAAAGGAACTGATGGCAGTGGTGCCGGTATCGATGAGCACCATTGACCGCATGG
AGCGCAATGGCGAGTTCCCGCAGCGCTTCTGGATCACTGATAAACGTTGTGCATGGAATG
CTGAAGAGGTTGAGAACTGGCTTGATGAGCGTCAGGCCACCAGCCCGGCAGAGTTCACCG
GAAAAAAGCCGCCGGTTGATCAGCGTGTTTACCGCCCAGTAAGTAACGCCGCATGACAGC
GCTGATCAGGCACTGGGAAAAATGGTCAGGATGGTACTTATTCCTGACCGCCGTTTCCGC
CTGGCTGTATCTGCTGGCGGTAATTTTCAGAGAAGGCTGGATCCGATGAGCAAATTAACC
CGTCTTGAAAAGTATCACCTGAACTATGTGTCTCAGCGTCAGGCTTCAAAGGTTGTCGCC
GTTACTCCGGCGGCGATAGAGGTAGAAAAGCGCGCTGTTGAGCGTGAATCGAAAGGCCAG
TACCGCATTGCAGCCCGACTCTGGTTGCTGTGTATGGATGTAGCGGTCGGTGAAGTGGAG
CGCGCCAGAATAGCGATACGCCGTGATCAGTGCATATCAAAAGGTAACGGCCTGCGCCGA
GGCGAATATGCAGGGATCGGATGTCGCGGGGTGGTGTATGACTAATCCTCACGACAATAT
CAGCGTCGGCAGTATCACGCTGGTTTATTCAGCTCTGCGCCGCGGGTGGCTTGTACCTGG
CGGAAGTGTCATACAGAACCCATTAAAGGCTCAGCGCATTGCTGAGCTGATGAACAGCAA
GAAGGTGGCGGCATGAAAGAGCGCGGAATGATTTTTAACGGAGAGATGGTGCGCGCCCTG
CTGGACGGACGGAAGACGCAGACGCGGAGACCTCTCAAATGGAAGCAAACTCGGTTTACT
GAAATAGCTGAACGCGAAGACGGTAGCCATTGGCCGTGGAGTGAGGATGCAGAAAATGTG
TGCGATTTCTGGCATCCATGCCCGTTCGGTGCCGTCGGCGATCGCATCTGGGTGCGGGAG
ACGTGGGGCGTAGTGAGTCATGAACTGGATGAAGACGGTCGCATTCAGCCATGGATCCCT
GACCGACCTGCCACAGCCATTCACGAGATGCCGTTTGGTAATGGCTACTATTCTGGTCAC
GCTATCTACGCCGCAGATGGTGATTTTACATGGGGTGATGATGATGGTTATGAAGATGGT
CGTTCGTGCTGGAAACCATCTATCCATATGCCACGCGCAGCATGTCGCATTCTGCTGGAG
GTTACCGGCGTGCGGGTGGAGCGCTTGAACGCTATCAGCGAAGAGGATGCGCGAGCAGAA
GGAATTATTGACGGTGGCTGTCTCAATTGCGGTGAACCTGAACCATGCGGTTGCGCTAAT
CCAGATCCTGACGCGACAGATGCCTTCGCTTACCTGTGGCAATCGATCTATGGGCAGGAA
AACTGGAACGCGAACCCTTGGGTATGGGTCATCGAGTTCAAGCGCGTTGAAGGCGGTGCA
GCATGAACGGTAAATACACTCTGATTTATGCTGATCCTCCTTGGTCATACCGCGACAAAG
CAGCCGACGGCGAGCGCGGCGCCGGATTTAAATATCCGGTTATGAACGTGCTGGATATCT
GTCGCCTGCCAGTGTGGGATCTTGCCGCCGACGATTGCCTACTGGCAATGTGGTGGGTTC
CTACTCAGCCGGTTGAGGCGTTGAAAGTGGTCGAATCGTGGGGCTTCAAGCTGATGACCA
TGAAGGGATTCACCTGGCACAAGACGAATAAGCACAAAGGTAACAGCGCGATCGGCATGG
GCCACATGACAAGGGCGAACAGCGAAGACTGCCTGTTTGCGGTGCGTGGGAAACTACCGG
CCCGCATGGATGCGTCAATCTGCCAGCACGTCACGGCGCCGCGCATGGAAAACTCGCGCA
AGCCTGACATCATCCGCGAAAAACTGGTGCAGTTGCTGGGCGATGTTCCGCGCATTGAGC
TATTCGCCCGCCAGTCGTCACATGGTTTCGACGTATGGGGCAATCAGTGCGAAGGCCCGT
CGGTGCAGTTGCTACCAGGCTGCTCTGTTCCGGTTGTAAGGACGGAGGCAGCATGACAAT
GTTCAATGAGGCGGAGTTAATCCGCCAACTGGAAGAACAGCGCGCTGTGATTGTGCAGAA
AAGTGCTCAAGTTAACTGGTTGCAAACTGAAAACAGTGTTTTGCACAAGAAATGTGAAGA
ACTGCAAATGACAGTTGATCTACAGCGAGAATTTATACAATCCAGAAATTAATCACCTTC
ACTCATCCATCGCTCAAACTTCGACGGGGAGAATGGCACCAGATCGGTGTGCTCCCCGCT
AATCCAGGCATCAACCATATCTGCCCACTGCTGCAACATGTAGGCGCGCTGCCTGGCGTA
CTCCGCTTTGTTGTATACCGCACGCACTCCCTTTTGCTCATGCGCCAGCGCCTTTTCAAT
CCAGTCTGATGGATAACCAGCCTCATGCAACAGCGTACTGGCTGTGCGGCGCAGGTCGTG
CACAGAGAATTCATCAAGATGCCCACCAGCCTCGCTCACCGCTTCGACGGTGGTATTGAT
CAGCCTGTTCAGTGCGCCATTGGATAACGGCTTGCTAACCGAATAGCGCCCGGGCAAAAG
GTAATCACTTCCACCAGCGCACATCTGCAGGCCAACAATGAGATCCTGCGCCTGCTTTGG
CAGATAGATAACGTGTGACCGGCTTCCCTTCATTCGTTCCGCCGGTATCGTCCATGTCCA
TTTTTTGAAATCGATTTCTGACCATGTGGCGTTGGTGAACTCGCTTTTGCGAACCAGGGT
GAGCAGCACCAGTTTTAATGCCAGTTTCATTGTGGCCATAGCCCCGACATTATCCAGCGC
CCGGAAGAATACGCCTATCTCTTCAGGTTGCAGCGTGCGGTCGCGCGGCTTGAACATGGC
TATTGATGAAGGCTTGATATCAGCAGCAGGATTAAACAGGCCATGCCCGCGATCATTAGC
GTGACGGTATACACTGCTGATTATCTCTCTGGCTTGCACTGCCGTAGCCCGGCCTCCACG
TTCAACAATGCGATCGCACAGGTCACGCACCATGCCGGTGGTTATCTCAGCCATCATTTT
GTTACCCAGCACCGGCATGATGTCGCGATCGATAACGGCCTGTTTCATCGCCCGGGTACT
GTCAGCCAGAATGACGTGCTTCATATAGCTGTCGGTATGTACCGCGAAGGTTTCAGCACC
ACGGATCTTTTTGATACCGTCACGTTTCGCCGCAGCTGGCGACTGGCCTGCCTTTAACAG
TTTTTTGGCAGCAATGAGTTCTTCTCGTGCTTCCGCCAGGCTGATACCGTCACGACCGTA
CTGACCGATGACCAGCGTTTCCCGGCGCCCGTTAATGCGGTAGTCGTACCGGAAAGAGAC
AGAACCGGAAGTAAGCACCGCAACATACAGCCCGTCACGATCCGAAACCTTATACAGTTT
GTCCTGCGGCTTGAGGTTTTTCAGTTTGGTATCAGTAAGCACAATTCACCCGTAAAGCAT
CCATGGTTTGACGGTATGAAGAGTATACCTTTAAGGTAATACCGTCACCTGTACCGATGA
AAAATGTGAGATAGAGTGAATAGATATGATGTGATATAAAGAAAAACCCTCTGTAAAAAC
AGAGGGTTGATTGCATAACTGAATAGAAATGATTAGCTGTGAGTTAGCTGTACATCATTC
CCACTCAATAGTTGCTGGTGGCTTGCCGCTGATGTCATACACCACGCGGGAAATACCATT
CACTTCATTGATAATGCGGTTGGAAACGCGACCGAGGAAATCGTACGGCAGATGTGCCCA
GTGTGCGGTCATAAAGTCGATGGTTTCGACAGCACGCAGAGAAACAACCCAGTCATACTT
ACGACCATCGCCCATTACGCCAACGGAACGTACTGGCAGGAAGACGGTGAACGCCTGGCT
GACTTTGTCGTACAGGTCCGCTTTACGCAGTTCTTCAATGAAGATGGCGTCAGCACGGCG
CAGCAGGTCACAATACTCTTTCTTCACTTCTCCCAGAACACGAACGCCAAGGCCTGGTCC
CGGGAACGGGTGACGGTACAACATGTCATACGGTAGGCCCAGCTCCAGACCAATCTTACG
CACTTCGTCTTTGAACAGCTCTTTCAGCGGTTCAACCAGGCCCATCTTCATCTCTTTCGG
CAGGCCACCCACGTTGTGGTGAGATTTGATGACGTGTGCTTTACCGGTTGCAGAAGCAGC
AGATTCGATAACGTCAGGGTAGATGGTGCCCTGCGCCAGCCACTTCACGTCTTCCAGTTT
CAGCGCTTCTTCATCGAATACTTCAACGAAAACGCGCCCGATGATTTTACGTTTTGCTTC
CGGATCATTTTCGCCAGCCAGCGCTGACAAGAAGCGATCTTCTGCCGGTACGTGAACAAT
ATTCAGACCAAAGTGATCGCCAAACATATCCAGAACCTGCTCTGCTTCGTTGAGACGCAG
CAGGCCGTTGTCGACGAATACGCAAGTCAGGTTTTTACCGATAGCGCGGTGCAACAGCAT
TGCGGTTACGGAGGAATCCACGCCACCAGAGAGGCCGAGGATGACTTTATCGTCACCGAC
CTGCTCGCGGATGCGGGCTACAGCGTCGTCGATAATTTTCGCGGGCGTCCACAGGGCTTC
ACACTGGCAGATATCACGCACAAAACGCTCCAGCATGCGCATACCCTGGCGGGTGTGAGT
CACTTCCGGGTGGAACTGTACGCCATAGAAGCGTTTTTCTTCGTTGGCCATGATGGCAAA
CGGGCAGCTTTCGGTGCTGGCTACGGTGACAAAGTCGGACGGGATAGCGGTAACTTTATC
GCCGTGGCTCATCCAAACGTCCAGCAGCGGTTTACCATCTGCGGTCAGCGCATCTTCGAT
ACCGCGAACCAGTGCGCTGTCGTTTACGACTTCAACCTGCGCGTAGCCAAATTCACGTTC
ATTAGAGGCCTCAACGTGACCGCCCAACTGCATCGCCATGGTCTGCATGCCATAGCAAAT
GCCGAATACCGGTACGCCTGCTTCAAAGACATACTGCGGCGCACGCGGGCTGTTTTCTTC
GGTGGTGCTTTCCGGGCCGCCGGAAAGAATAATGCCGCTTGGATTGAAGTCACGAATTTG
TGCTTCTGTCACATCCCACGCCCACAGTTCGCAGTAAACACCCAGCTCACGCACGCGGCG
CGCAACCAGTTGAGTGTACTGAGAACCGAAGTCCAGAATGAGGATGCGATGCTTATGAAT
GTTTTCCGTCATTGACGCTTATTCCGAGGCAAGTGAAACAGATAATATAAATCGCCCGAC
ATGAAGTCGGGCGAAGAGAATCAGGAGCCCAGACGGTAGTTCGGGGACTCTTTAGTAATG
GTCACGTCGTGAACGTGGCTTTCCTGAATGCCCGCACCGCTGATACGTACAAACTCCGCT
TTAGTACGCAGTTCGTCGATAGTACCACAGCCGGTCAGGCCCATACAGGAGCGCAGGCCG
CCCATCTGCTGGTGAATGATCTCTTTCAGGCGACCTTTATAGGCTACGCGACCTTCGATA
CCTTCCGGCACCAGTTTGTCGGCAGCGTTGTCGCTCTGGAAGTAACGGTCAGAAGAACCT
TTGGACATCGCGCCCAGGGAACCCATACCACGGTAAGATTTGTAAGAACGGCCCTGGTAG
AGTTCGATTTCCCCGGAGATTCTTCAGTACCCGCCAGCATGGAACCTACCATCACCGCGC
TTGCGCCAGCGGCGATAGCTTTGGCGATATCGCCTGAGAAACGGATACCGCCGTCAGCGA
TAACCGGAATGCCGGTACCTTCCAGGGCTTCTACTGCATCAGCAACGGCGGTGATCTGCG
GAACACCGACGCCAGTCACGATACGCGTCGTACAGATAGAACCAGGGCCGATACCCACTT
TAACGGCACTGCAACCGGCTTCTGCCAGCGCACGGGCACCTGCAGCAGTTGCCACGTTGC
CGCCGATGATTTGCAGGTCAGGATATTTAGCGCGAGTTTCACGGATACGCTGCAGAACAC
CTTCAGAGTGACCGTGAGAGGAGTCGATCAGCAGAACGTCAACGCCTGCGGCAACCAGCG
CATCAACACGCTCTTCGTTACCAGCGCCAGCGCCAACCGCTGCACCTACACGCAGACGGC
CTTGTTCGTCTTTACACGCGTTCGGTTTACGTTCCGCTTTCTGGAAGTCCTTCACAGTGA
TCATGCCGATCAGGTGGAATTCATCATCAACCACCAGCGCTTTTTCAACGCGTTTTTCGT
GCATTTTTGCCAGCACCACTTCACGGGCTTCGCCTTCACGCACGGTTACCAGACGCTCTT
TCGGCGTCATGTAAACGCTAACCGGCTGGCTCAAGTCGGTCACAAAACGCACGTCACGAC
CGGTGATAATGCCGACCAGTTCGTTTTCTTCGGTAACAACCGGGTAGCCAGCAAAGCCGT
TACGCTCGGTCAGTTCTTTCACTTCACGCAGCGTCGTGGTTGGCAGTACGGTCTGCGGAT
CGGTTACCACGCCAGATTCGTGTTTTTTCACACGGCGAACTTCTTCTGCCTGGCGTTCAA
TGGACATGTTTTTGTGGATAAAGCCGATACCGCCTTCCTGAGCCAGAGCAATAGCCAGGC
GCGCTTCCGTTACGGTATCCATTGCTGCGGAAAGCATAGGGATATTCAGACGAATAGTTT
TCGTCAGCTGGGTGCTGAGGTCAGCAGTATTCGGCAGAACGGTAGAATGTGCAGGAACGA
GGAGAACGTCGTCAAACGTCAGAGCTTCTTTAGCGATACGTAGCATGGGCAATATCTCGA
CCAGAGTGGTTAATAAATATTGCCGCGGCATTATACAGAGCGTAACCGATTGCATCTACC
CCTTTTTGCAAAAAATGCTTGCTATCCCCGGAGGGCGGGTTACTATCGACTGAATAACCT
GCTGATTTAGAATTTGATCTCGCTCACATGTTACCTTCTCAATCCCCTGCAATTTTTACC
GTTAGCCGCCTGAATCAAACGGTTCGTCTGCTGCTTGAGCATGAGATAGGGCAGGTGTGG
ATCAGCGGCGAAATCTCTAATTTTACACAACCAGCCTCCGGTCACTGGTACTTTACGCTT
AAAGACGATAACGCCCAGGTGCGCTGCGCGATGTTCCGCAACAGCAATCGCCGGGTGACC
TTTCGCCCGCAGCATGGGCAACAGGTTTTAGTTCGCGCCAACATTACGCTGTATGAACCG
CGCGGCGATTATCAAATTATTGTCGAAAGTATGCAGCCCGCCGGTGAAGGTTTACTGCAA
CAGAAGTACGAACAGCTTAAAGCGAAGTTGCAGGCTGAAGGTTTGTTCGATCAGCAACTT
AAAAACCACTCCCTCCCCTGCGCACTGCGTTGGGGTGATTACCTCAAAAACAGGTGCCGC
ACTGCACGATATTTTGCATGTGTTGAAACGCCGCGATCCGTCTCTGCCGGTGATCATCTA
CCCCACCGCCGTACAGGGGGATGATGCGCCGGGGCAAATCGTTCGTGCCATTGAACTGGC
GAATAAGCGCAACGAGTGTGACGTGTTGATCGTTGGCCGTGGCGGTGGTTCGCTGGAAGA
TTTATGGAGTTTTAATGATGAGCGTGTGGCGCGGGCGATTTTTGCCAGTCGCATTCCGGT
GGTTAGCGCTGTCGGGCATGAAACCGATGTCACCATAGCTGATTTCATTGCTGACCTGCG
TGCGCCTACACCTTCCGCTGCGGCAGAAATGGTCAGTAGGAACCAGCAGGAGTTATTGCG
GCAGATTCAGTCAGTTCAGCAGCGCCTCGGTATGGCGATGGATTATTTCCTCGCTAACCG
TACCCGCCGCCTTACTCTACTTCACCATCGCCTGCAACAACAGCATCCCCAGTTGCGTCT
GGCGCGTCAGCAGACGGCGCTGGAGAGACTTCAGCAACGAATGAATCTGGCGATTGACAG
TCAGATTAAGCGGACGAATAAGCGGCAGGTTCGGCTTTTACAACGCCTGAATCAACAAAA
TCCCCAACCACGCATTCACCGGGTGCAAAGCCGCATTCAGCACCTGGAACATCGTCTGGC
GGAACATGTGCATTCACGCCTGAGCGCCATGCGCGAACGCTTCGGCAATGCAGTAACACA
TCTTGAAGCCGTCAGCCCTCTGTCCACACTGGCGCGTGGTTATAGCGTGACCACGGTCAC
AGACGGTAAGGTACTGAAAAAAGTGAAACAGGTGAAAACAGGCGATGTCATGACCACGCG
ACTGGAAGACGGTTGGGTGAAAAGTGAAGTAAAAGGGATCACATCTGCAAAGAGAGCGCA
AAAGAAAAAGCCCGACTAAACCGGCACAAATTCCACACGCTTTTTAGAGATCAAACCGTG
GCCATGCTGGCAGAAGTAATCCACCGCACCGCAGGCTTTTAATATCTGTAACGGTTGGTG
GCAGTCCGGGCACAACGCCTGAAATACCACATTCTGTTGGCAATGCTCACAATATGTACG
ATCACCGTATAATTCAATGAACTGATGACAGGTCGGACACTGTACTTCCATCAGAGTTTC
CTGCGTTTTTAATGACGATGTCAAACATTAGCACATGTTTACCAGCATTAAAAACCGCCC
CATGTAAACACATGGGAGCGGTTTTCTACTACTTACTTAACAATGAATTACTGGGCGCAA
ATCTGGAGAGATGACTGGGCGCCGTACTCTAATCCTCCCGTCAGCATATTCATCCATTGA
GTAATGGAAGTCGGATTATTAGTCCAGTACCCTTTATTGCCGTTCCCCGCAGGCCATCCA
CCTTTCAGATAATATACATGCAGAAAATCAACTTCAGCGCGAAGCGCACTTAAATCGGCA
ACTGTCGGGTATTTATCTGCGGCACAACCACCACTACCTATAGCTGCTTGCGATGACGTT
ACCATTGCCCAGTTTTCTGCGACCTGCATACCTAACCGATCGCTTGCAAACTTATATGAA
TCCCCCGCATTTGGTAATTCACTAAAAAGTTTCGGGCGATTAAATGTCCGACCATTCAGC
GTTAACGTATCTTCCATATACCCCCAAAACTCAGCGTCAGGCGTATCCGGGCTGGTAATT
GTCTCAAAAATGACTGGCATTGATCCTTGAGCTGTTCGCTCACTCAGATCCGACTTGTCA
TTCTGGATATATATATCGTGGAGGCTTCCCAAACCGTTTGTATTTTGTGCCAATGTAAAT
TCAAAGAAACCAGACTTATCCGCTGTCGCATAATAATACCTCATCTCATCAATACTATGA
GTCTTTTGCGTACTATTGACTATAGTCATATCGGCAACCCCACTCTTATTCCCCTGACGG
CTTATTGGATAACGATATGTCATTGTTCCCGGTGCATATGGAACACCTTTCCCACTACCA
TCCACAGCCTGAAGACGGACCTTCACTGACTGTTTACCAACTGTTTTCCCTTTGAATGCG
TTAAAAGTACCTCTACTGTTACTTCCATGGTTGAAACCAACAACTGAAACCATATCCGAC
GGATTTATAAGCTTATATTTCGTAATTTTCGGATTCGTAGTCTGCTGGCACATTACCAAA
AAGCCGTTTACTGTTACTGGATCAGGGACAAACTGATCAGAAGTCGTGCTTCTATTACTC
AGATTAACCATCAGGAAATTACGACTACTAACAACGGCTGAGTCTGACGTTTTTGAATGG
TAGTTAGCGCTTACAGGCAAACCTGTTTTGGCCTTCACCCCATCAGGATAAGCATCGATC
AACGAGTTCAGGTTCTGTTGCGTTGGAACATTGAGTGATCCTCCAGGGCCACATCCCCCC
TTTTCTCAACCGCTGTTTCAAGGTGATTATTCCTGACCAGAACCCAGGATTCATTTGATT
CTAAGACACTCTTAAAGGGGTTTTGTACCTCAGTAGCAAGTCTGGGGCGCTTAAACACAA
TACCGTTACTGGCCTTAAACGTTTCACTCATATGGCCCCACATATTGGCGAGCGTGCTGT
CCGGGCTGGTGATCACGGTAAAAGTGACATCTTGCGTCAAGGGAGTACTCATGCCGGTAG
CAGTAATGTACAGCGGTGTTTTTACCCCTATCCCCTCATTTTGCGTTACCGCGATGGTCG
CGATGCCACCTTCCCCCGTTACCCCTTTGTATTCCGTGGTGGTGTCGGTCATAACTGTAC
CGCCCAGCGAAACGGGGGCACCAGTATCATTTGCAACATTCTGACGGTTAGTGGGTACGC
CGCGCCTAACAGTAAAAGGCGTGCCCGCTTTCAGATTGCCATCACAATCTTTCACCGTCA
GAGTCAACGTAATGGTCTCCCCAACTTTCGCTTTCGCTGCACTTATGCTGGCGGCAATCG
GCGTTGCCACCGCAGCCGCCACATTCAACGGGAATTTGGTATTCGCTAACGACACAGGCC
CATTATCCGGTACACCTGATGTGGTATGCAGTAACAGCGTTGCCGCACTATTGCTATCGA
CTTTTGGCCACACTACTAACTGCCCGGAAAGATTTTGCTCACAAAAAGAGAGGGCTATAT
TCGGTTGTGGATTGAGGGGCTCATTGGGTTTATCCGCTTTAGCCCAGACCAGACTGACAT
CTGGGGCAACATCATTTAGCCATGAGAGCTGTGGTATATCATCAAAACGATCCCCTTCGG
CATCTGATGGATTCGTCAGATACAGTTTTTCCGGTGTCGTGTCAGCACTGAATGCTTTCG
GCAATGCCGTTGCAACAATGGCAGTCGTAGTTGCAGGATCAAGTTTCGTACTTCCCTGAT
ATACTGGAACAGACACACTTTCTGCCGTCGGCGGTGTACCGTTAAGCTTACCTGTGGTTT
GGTTCTCGCTTTGCCATATGCCAGAGTTATCGGCCTGCACAGGAAAAGCAGCACACATTG
ATAACAGGATGCAGCTAACGCTGGTTTTTAATCTAAAATTCCCTTCCATGAGTGATCCCG
CTGTAGTCATTATCTGGTTCAATATACTTTGCTTAATGGTTGATTAAGCAAAGTATGCTG
GTAATGCCACTCCCCGAAGGAAGTGGCATTGGGCATAATTATTTGATTTGATAATCGATG
GACAAGCTGTACCCCTGCACGCCATCATCGCCGAGAGTAAGGCTGGAGCTGTTGAATGCA
GTACCCGCTTCGGAGTTGGTTGCCGGAATAACCAGTGCAGTGTTGTTCCAGGTATCTTTA
ACCACACCACCCGCAGTACCGTGCGCGCTGGTGCCGGAGAAGCGCCAACGGTAGTCGTAC
TGGCTGGTAACATCCTCGCCTGTATCAACTTTGTTGTTGTTGTTCGCATCAGAGTACAGG
ATGACACTGTAGGAGGTTTTCGTCGCCAGAATGTCCGTAGTACCCAGCAGGTTTTTCTTA
TTAGTGTCATCTGTTTTGTAAATAACAACTTTCACATTGTTATCAACAACCGGACCGGCT
GGGATATCATCGCTTGCAGAACCACCACCATCACCAGAACCGGAACCATCACCTGTGCCA
TCACTGCCACCGGAACCATCATTGTCACCCGGACCATTAGTAATATCTGCCAGCGTCAAC
TCTGCACCCACAGCCGGAATACCGGTCGCGGTGGTAGGGGTAATTTTGATACCAATTTTT
TTACCCGCATCAGCGCTGGTGAGGGTATAAGTTTCGCCTTCGGCTCCGCTAATTTCCTGA
CCATTACGCAGCCACTTAATGGTAGCTTTGGTCGACGCATCATTAGCATCGGTATCGCCT
TCAGCATCAGCGAGTCCCCAATGTACCGTCACTTCATCACCAACAGCCAGTTGTGCTGTT
GATTTGCTGCCACCGCGTTTTGCACTAATACTAACGTGGTGATCAACAGGTGTCGCGGAA
GTGTCCTGAATCCACGGTACCGTACTGTTAATTGCGCCAGTACTCTCGGTCACAGTGGTC
CATGCTGCAGATGCAATTGCAGGAATGGCACAATACCCCGCAACAGCCAACGCCAGCACA
ACCTTTCTTAAATTACGATTACTTTCCAGTTTCATTACTACTATCTCCTTGGTTACCCTT
CAGCCACAGCCATATTGCATTGCTACGCTGATTTTTGCTTTTCGCTATAAACCACACGAA
TCCCATATCCCTGCACGCCATCACGCTCCTCTGCATCAAATTTCGATGCGGCTTCCTTGT
TGGTGGCTGGTAGAATCAAATCCTCATTTATCGTATTCGCTTTCGCGCCAGTAGAACCGT
GTGCGCTTTTACCTGTAAATTCCCACTCATAGTCGTAACGCGCTTTTTCTTCTTCAGTCA
GTTTTTCCGACTGCTGATAAATGCCATCGTTATTGGAATCACGCCACATCACGAAACGAT
AACCAGATTTCAGAGGGATCGGTTTTGCATCACCGGCAAGATTTTTCGGGCTGCTTTCCT
CAAGCCGATAAATAAAGCCATTAATGCCGCCAACATTTGCAGTGTTGGTAAAAGTAACAT
CCACAAAGTTCGAGTCGCTATACGGTTCCGCCTTCACTTTCCAACGGAAAGTCCCCGGCA
GCGTACTGGATAAGGTAATAGTGCCCTTCTCTTTATCGCGCTTAGCAATGAAGACACACG
GTGTTTCAGTGACGCAGGGTTTGGTGTTCAGCGTCACTTTCTTGTCGTTTTCATCGTACA
GTGTCGGTGTCACCCCTGTTTCAGGTAAGGTGTTCCCGTTTTTGTCAGTGTTATCACCAA
AACTGTCAGTGATATGCATATCCATGACAACACCATCGCTGCCATCGGCTTTGGCTTCCG
CTTGATAGCTGTGATTGTTATCCGCAGGGACACTGAGAACATGGTTAACAATCAGTTCGA
TCTTACGATCCTGTTTCACCACAATTTCGACGACACCTGAGTTTTGGCGGTTACCTTTCT
CATCTTCCAGTGCAAGGCGCACACGCCAGGTATTAACCTTCTCTTGCTCTTCTTTGGTTG
ATGCACTTTGCCAGGCCGGCAGTACCAGGTTCCAGCGGTTGTTATTACCTTCCGTCAGTG
CATTCGCTTTCACAACAGGCATGACTAACGTGCGGTTAGCATTATTTTTCGCCTGCCATG
ATGCCGCGACGATTTTGTAGTGGTTATTAATGAGAGCGTTAATCGTCCACTTGCATTTTT
CCAGACCTACGGCCAGCTCCGGTGTATCTTTTACGATACATTCTGGATGTTCATTCGCAG
TATCGGCTTTCAGCCACAGCGTCACATCAAGCGGATCTTGTTCACGATATTCCAGAACAA
TGAAATTATTACGTTCCACGAAGTCATGACGACTACCCATTAACGAATGTTTAGCTTTAA
CATTGTCAGGATCTAATTGATCCTTCAGTGGCATACCTATCTGATAATTTAGGGATACAT
TGACACTTAAATCAGAATTATCACCCGTACCGGATTTATAATCTGAACCTACGGTAAATA
GCGGCACAGGGTTATACATTAATCCGACGGTTAACGCCTGGGGATTTTTTCCAGGTTATC
GGTGCCGAATAGCGCAACTTCATCACCGTAATATTGTTCGTAAACCAGCTTTGCACCGAA
CTGCGGCCATGCTGGCAACCACCCTTCAGCCCGGACATCCCAGCCGCGCGCTGGTCGTTC
TTCGTAAAAGTCGAAATCTTTTGAATCTTTCCAGTCTGAAAGTGGATGGTAATAGTTTCC
GGAAAACTTCAGATAGTCGGTCCAGGCTTCGCTACCCAGCCCCAAGCGACGATGACCGCG
AGTAAAGTCATAGTCATAAAACAGGTTGCCGCCAAGCAACCAGCTACCAATGTTCTGGCG
TACACCAACCCCAATGTTACCGATGGTTCGGTCGTCTTTACGTTGTGCAGAGAACTGGCT
GAAAACGAGTGTTTCCTGGTTATCATACCAGGGGACAAAGTAGTCAAAAGTGCTGCCATC
CAGGTCGCCACCTTCTCCTATAGACAAGCTGGTTCTGACAGAACCATAAGGCGACAAGAC
GTTCTCAAGATAAGACTGAGCAGTGGACGTCACCTGCTCTTTCGCATAGCTTTCAGCCTG
AGCCTTCAGGGCCTCGGGCGTTAGATTTTCAAAACCTTGCGTGGCGGAGCTTATAAAATA
ACCCTGAGCTTTACCGCCTAAAGCACCTTTTTCATCTTTGCTGTTTGATTTTTCACTACT
ACCTAAATCAGGAAGTGTATTAGGGCTATCAGTAGAACTGATATTTGTTGGTTCCACCTT
TCCTTCTGATGCCCATGAAGCACTTGCCCATATAATAGAAAAAAGCACTGGAGACCAACG
CAACATATAAAAACCATCCCTGATTTAATTTCAAATTAAATTTTATTTTAGTTTATTTCA
AATCAGCACAAATTGCAAAAAAAATATCACACAAACCATATATTATAATTTTAATAAATA
AATTAAATTTATTTATTAATTATAAAAATATAAACAATCAAAATTAATGCCAGATAATAT
ATTTTTATTATGGATATATAGCGCGTAATAAAAAACGCTGCTGTAGCCAATACAGCTCCT
TAATCCGCGCCACTATGACAGTCTCCACAACAGAGGGGCGTTTTCTTATGCCATTGCTTA
ATGATTAACTCAATTTCTGGAACCTCTATTAATACCATCGTCTTCGGTGCAACTTTTTGC
CGAACATTTTTCTGCTGAGAGGTTATAACACTGCTGGTGCGCCTTGTTGAGCTGATGGGC
CTCGCGGCCACATCTTGCTGCCTGCTCGTAAGAATATGCAATCAAGCAGCAGAGAAACAT
AAGAGATTGCCCCCAGGAAATAAGCTCTAAATTTACCTTTGAGTTCATCGCAACAGCGCT
GATAGTACTGGGGAATACCGATTCGACAGGAACAAGTCCGAAGAGGTTGGGGCATCTGCG
TGGAAATTTGGAAGCGCTGCTCATAGCCCCCGATCATCAAGGCCGAGGGAGGTGAAGATA
TCAAAAAACATTATCCAGTTAGCAGCAATGCCGCTCCGCTTAAGTGGACGGCATTGCGCT
ACAGAAGATAAATATGTAATTACTTACTTTTCTTAATATGAAACACAAAAAAAACGATAT
ACATTTGATTTTAAATTATTTTATAACAACCTCCTTTCCACTGGGTACACCCTTGTGTAC
ACATAAAATTGACACTTTATCGATTTTTTGCTTGTTTTTTGCTCCATGCCAAAATCTCTG
CGGCATCAAACATTACTCGCCTCTCACCCATCTTAACTGGTTTTGGAAAATCGGGTCTCA
TCTTCCATCGCTGTAATGTGCTTTTGCTAACAGCAAGAAAATCGGCTACCTTTTGCACAC
TCACATATCCTTGGCTTGGAAAATCAGAGCTGTTGACATCATTCTCCCGTTCTATCCTTG
CCTCTTCATGAAAACCAGCCTTCTTTGAAGGTATTTTAAGCGGTCTCTCCCGCGCTTTAT
CTTTTACAGAGTAAGACTCGATCCTGAGCTTTTTGTGTATCTTAAGAGGAGGTTTTTTGG
CTGGTGGCTCAGGCGTCGGTTCTGGTGGTAAATAGTAATAGTAAGCCCTCACTAAATCTT
CTGGTGTCAGTACACCGTAACTCATTGTTTCACGATCCGGGCGTAGTTCCAGTACCCCAA
ATCTAAACAACTTGTCCATTTCTGCGCTTGTTATTTCGAAGTGTTCTGACTGCTGCCCCC
GAAGCTGGTAAGTTAACGCTTCTCTGGCTTCTTCAATATCATATTCGGGATGAGGAAAAT
GTGGTTTGCGAATCATCTAACTACCTAAACATCTACCCAAGAATTAATGCAAAAGTAAAC
AATATCATATACAATATAAATGGTAAGTAGTTACCTAATTATTGGAGTAAGAAATTACAT
ATGGATATGACCATGCAGGAATTACGGGCTACTCTAAACCTATCCCCCAACTATCCTGAA
GAAAACCACTTTCTAGATGATAATCTAACGGAAGAACTCGATAATGAGGAAATTCGACAA
CATCTGGGAATAGATTCGGATTGGATGGATGCAGTGGACACTAGCCAGATAATTTGAATC
CTAACTAACAAAAACGCTGTCTGCCCTCTGTAGATTGGCGCTCTGTAGTGTTTGTCTTGC
TTGCTTTTGACACCAAGTCGCCTGTAACTATGATCACGGGCAGGCATGAGCAAACAGATA
ACATAAAAGTCTATTATGGGAAGTGATTCAAGAAATCATGGTAATTCATAGATAACTAAA
ATAGAATAATAGCCCAAATCAAACTTGATGAGGGCTATATTTTTAGTAATTGAATGATGT
GCCATTCCCGTTAGTTAGACTTTTTATGCTTTTTCTGAGGAATGGGTGTGTCATAAAACC
GTTGACTCTCACACCGTAGACTGATAGAAAATTTTGGCATATAGGTATCAATTTTTTGCT
ATCATCCTTTGATGATTTTAAATCAATAAGTGTTGATATGTCTTGGTGTGTTATTAATTC
TGTTGAAAACTTAAGCGCCAAGCTTTCTTTTGCGAAAATTGGCGCTCGCATTTCTGCACT
GAGTGATATAAGAATTGTCCTTACGCACCATGATATCCTTTTATTCATTAAGAATTTGTT
TTGAATGTTATTGTTTTCAGCACATATAAAATGCAATAATTTTGTTGCAGTATCAATATC
ATCTGAATAATTTTCTTTGTATTTAAATGATGATGATATGCTTTCAAATAGCTCCTCGTT
AAATATTGGCAAGCCCTCTTCCTTCAAGTGCAAGGCAAATAAACTCCCACCTTCCATTAT
TTTCTTCGCCAATGCAACAGGATACATTGCTATATTTAACTTTCCTTTCACAATCATTTT
GTAATGTAGGCCATCGTATATAGCAAACATATCCACATCAGATGCCTCAGTTTGATCTCC
ACGAGCAGTGCTTCCATAAATAACCAAAGATTTAATATCCATGCTAAGACCTTGATGTAC
ATATTTTATTTATTAAAGTTGGTATTAATATACCATACCACCATACACCAATCATCATGT
TAATCAGGTGTATTGTTTCATCTAGCTGCCCAATACCACTGGTCGTGCGCTCTGTTGAAT
ACTTCGTGTAACCTGTAAGAAGAGTTATATCAACTGCCTTCATGAATGCCCCAATAACAT
CACCGGATGATGTTATTGCATAGATAATCGTAAATACAATCATGATAAATAAACCAACAA
ATATACATCTGAATAAACTCCCTCCCCAACCATTAATGAGACCTGATGTATTTATTATAA
AATTCTCAATCACTGATTTTAACAGCAGTATGCTGTACCATAGCTTTTTTGTTACTTTTG
AATTACTACGCTCGAAGAGTAGAGATTTCTGCTTAGATTTTTGTTTGCATTTGAAGTGAA
CCTCTACCGCCTGATAATACACTTCATCATCCGGAATTGTAGATAATGAATTAAGCAATA
TCTTAGAGCACTTTGTTTTAGTTCCATAGGACCTGTATTTTTGGTACTCAGGTGTTGTAC
CTTCTTTCTCACAAATATCTTTATCTTGATTTACAAATAGCGCACCAATAAATTTACTTG
GCTCGATATATGTATTATTTAACTTTGTTTCATTACCGGAATAAGATATATCCTTATATG
TACAATTATTAAACTGACAGTTTTCAAATGATGCCATTGAAAAACTGCATTCGATAAAGG
TACAATCTACAAATTTAATATTTTTGAAATTTGCATAACCAAAGCAAACCTTCCTGAACT
CACAACTCTTAAATGTTATTCTTATTCCTTTGTTGTCACCATATATATCACACTCTGTAA
ATACATATCCTGAAAAGAATTTATTTTTAAAATTTTCAGGTTTATGTTTCTTTGATAAAA
TCAATTTTCCTTCATAGTCTTTAGGAGTAGCTATATGCTCAGGAATAGTTAAGTCTATCG
CTACCTTTCGAGGTCCAGAGTTGTTTTTCCCGTTAATATTTAGGTCGTCAAGTCCCCATT
TGATGAACTCTTCCAGATTAATGTTAGGATCATATGTCGCATCCCAATAATTTTTTATCC
GATGCTGCCTGATGCTGTTGGCCATTTTTTAACCCACACAATTCTTTTGTTATGTATTTC
AGGCTTTGTTAACGTTTCAGCCAGAATGCTGCACTGTCTGTATATACAAAAAACTGAGTA
TTGGTGCTATCGTCACCGGTAACTGGAACTTTTACACGGGAGCATCAACCAAATTCGTTC
TTTCATTGTATCCGCGTTATACGTGCATTCAAGCTACAAGATGATGAAAAACGCCTGTGT
CTATTCTAGCAAGTGAACCGTCGTGAGTTCAACAGACACAAGGGGCTACCCTTCAACAGA
TCCTGCTCTATGGTTGGGGGCCCCCCTTCGCGTTATGCGTTCTACGTTCATAAATGTTCG
CTATTGGCACATGTCGGGTGAAATACTTGACCAAAAACTAAAGTACACGTGCCTAAGCAA
AATCTGAAACTGAGAGACTGGCTAGTCAGAGTCGAATTTTACGCAAGGACTCGGTTCAAC
TCTTTGTTTGGCAGTCTCTGCTCCCAAAAATGGTTTCATGCATATGATAAACCTTTTAGA
TTAGATTGAGCTCAGGTCAACAATAGTGTCAGATCGAGCACAAATCAGCACTAATGATGC
TACACATCGTTTAGCACATCCAATTTTAGCCACCTAAAATGCGTTCTAATGCGGATATAT
GTCTACCTGCAATTCTTTCACCACTTCACACCGAAAACCTCAAATATCGGCTCCTATTAC
GTTTTTTCTCTGGCTGGGATTTTTACACGTCGAGAATAGGGAAAACATCCCAAAAAACGC
TTACAGTATTGACGTTACGTTGCAGGTATTCTGGCTTTCAGCATTACAACGCCAATATAT
ATTATTGTTTTTAATATTGTTTTTATTTATCGTTATAAGATTGATTGTTTTTTATACATC
AATTTTTCTATAAGAGTGAATCCTAAATATTGATATTTCTATGGGGTTGCCCTTCATCAA
AATTGCGTTTTTTTCTAAGACTTTTGCTTTTTCATTGAGCTACGCGGATACGCCGCCTCT
GGCGGCTTTCTCCCGCGACAGGTCACAATCGTCGAATGCGAGTCGCCGCCTTTGGCGGCT
TTCTCGCTACTGACGTTTGAGGAGATTATGTTGTGGTTTAATGACTATTTTTGATTAAAA
AAACCACAAATGGTCGCAAAACTCTACTACTAATAGTAACTGCGCATCCTTCTTTCTCTG
GATATGTTCAAGCGCGCTTTTCTCAGCACCAGCAACAGCGGCTTACTTCTTAACAATTCA
CAAAGCGTTATCGCCTTCGGTGAGTACTGTCTGGCTTGCAGCGCCTCTCTACGCTCTACC
TCTGCGGCTTTTCTGAGGGCTAGCGTTTGTAAGTTGTAGTATGTTTTATCGCTACATGTA
ACGATGATTGGTTTCACATGTGATCGTTCGGGTGAGTCAGCCAGTGTTCGCTGTATCCTG
CGGCGCTGCGCTGGTCTTTTTGCTTTTGACGCTTCAAGTTTCAACTGCGTACGCCGTACT
TCAAAGTATCCCGCTGCTTCTGGGGTTATGATCTGCGATGCGTGCGTTGCCCAATTACTG
GATGACGCCCATACGGACACTGATAACCAGTCGTACGGGCTTTTTTCTGCTCTGGCATTA
AACTCCTTAAGTTTAGTTTTACCTTTTGTAAGGTACGATAGGACTTCAAAACTGTAAACG
AATCTAACATCTTGATTTTTAATTAAATTATTGCGACCCTCATATGGCTGGCGCTTTACC
CACGCAACCAGCAGGTCTCTCGCTATGCTCTCATCTGGAACTTTCACAATCATGTGTAAA
TGTAGGGTATCCTGAAACGCCGCCCACTCAACACAATATATCCACGGAATACTGCGTCTC
GTAAGCGAGCGTGTGAATGTGGTTATCGCCGTTTTCAAAGTCTCCGGCGTGATGCACTGT
GCTGGGCGTAAGGTCAGCAAATATACGTTTCCACCTTGTGTAGCATCCAGATCGATAGAG
AGTAGACGTCTTTTGAAGGCTCTAAGCCTGTCAATCGAAAAAGCCACTTTGCGCTTTCTG
ATGTGGCTGTTTGGGCTTGTTTTCTTTCTTTGCTTGTTTTGGTTGCGTGGTTTCATGTAA
GCGTCAACAAATGCACCACGCTTGCGCACGATGTATTGTTCAGCGCGATCCCCGTGATAT
AATTTCATTGCGAATATGTTCCTAAAATTACCCGCCTGGCAGGGCGGGTTTTTTTATGTC
TTACAGGTACTTTTCCCCAATTGCTTGCGTTATCTCTGAGAACGACGATTCAGACACGTC
CCCTCTGATCCCCCTAAGTATTCGTAACGCAGACTCAACCTTGCGTAATATCTTCGTGTA
TCTTGCATTGGTGCGCCATATACAAAGCATTCCCGCTTTGTCGAGTCGGTATTTTACCAA
ATCCCTTTCAGGAATGTGATATGCACCATCCATGCGCTGTTCGACGGGGATACCCCAGTC
ATTACGTAACAGAGTTAAAACACGGCTGCGCTCATGTCCACCAGCAGAAGATAAGTACCT
GTCAAATTGGGTTGGGGTGAGGCTATGACCATCTAACAGAATATCGCGGATCTGTGCGGT
AGCTTGGTTTCGTGTCAATGCTTTCATCATTTGCCCCTTACAGAAACCGGGCTGCGAATT
GGTCGAGATCTGCAACCAACCATACTCTGCGCTTTCTGCCGTTGATAGACTGGACGGTGC
AAGTCGGAAAAGCTGGAATGTAACGCTTATATTGGTAAAAGCGTGATAGACAAACGCCAA
GATATTGCGCGGATTCTCGCGCGGTAAGGTAATTTTCCATAATAACGATCCATGTTTATG
TTTTGTCCACATTATGGGGCATCCTGCCCCATAAATACTGTACATAATTTTTTCAATTAT
CCCAAGTCTACAACCAAAAAATCTCCCGCGTAGCAATCCCTATAGTTCGCCCTTGTTCTG
TTTCAATTTCATATACGCTAGCTCCACACAAGCTGTATCGCCACCATAATTTCGATCTCC
GGCTAATTACAGTTACTATATTTTTTCATGGGGACGACGTTGTAATCTTCACCACTTTCC
AGCGTAACCAGCAGTTCAGCCCACTGCTCCAATGCAGCTTTTCTCTCTTCAAAATAGTGG
TGGCGATTATAAATACCTTCAACACCGGGTATTTTATGATTAAGACATCTTTCAGCTATT
ACAGGATCAATCCCCAATGCTGCCATCTGGGTACGCATCGTACGTCGTAAGTCATGAATG
CTAAATGGCTCAACATCAGGCATCTCTTTTAATACTGAAGGCAAAACCATATTCAGCGTA
CTGCGACTAACGTGCGATGTAGTCCTCCCCTCCTTGCCGGAATTAACCAGCGGCTATTAC
CAGCAAACAGACGGATTTCCTTGATCCATTCGATAACAGGATCAGCTAGCGGGATGTCTA
TCTCCTCACCATTTTTTGCTCGATCAGCAGGAAAATGCCAAACTTTTTCATCAAGATTAA
ACTCCGACCACTCGGCAGCGCATAATTCCATCTTGCGAACCCCTAGCGCGAGAATGATTT
TAAACGTTAACTCATTCTCTCTGCTAATACCCCGCCCCTTACGCAGAGCTTTAAAAAACA
TTACTAGCTCCTCACGCGTGAGTGCTCGCTTACGCCCTTGCTCTTTCCCGCCTGCATCTT
TTGAACTAAATGAAATCGCGGGGTTTACTTCAATCATCCCGCGTACAACAGCATAATCAA
AAAGGCGCTTAAGCATTCTTAGCACGTCATTCGCAACGGTAGGAGAACCGCGCTCTAATA
CATTCTGCAAAACATAGTCGATATGTTTCGGGCGTACATCCTCAATTTTCATTTTGCCGA
TAGATGCGACAATGTTTTTTTGTAAGCTACTGCGAAATAACTCCGGATGCTTGTAAGTGG
GTTCTATCTGCCGCGAGTAATACTCAGCGGCTAAATCTGATACTCGTTTTGCGTTCTTTT
GCGCTTCAATCTTTTCCAATGCTTCAGCTTTTCGCTTCTGTTTCTCTCCTGCTACGTCAT
AACCAAGAGAAACACGGGCTGCCAGTTCTCTGGCGACCTCTCTTGCTTTTGCAAGAGAGA
AATCAGTATACGAACCAATCAGCACAACTCGCGATTTTCCGCCTAACTTGTAACGAAAGC
GCCAGTTAGGGAGTTTGTCACTTTTCCTAAATCGAAGATAAAGCCCGTTTCCGTCTGCCT
TACCTTCGAATCTCTCATCGGATTTAATCCAAGCTTTGATTTGTAGGTCAGTTAATTTTG
CCATTACGAACACCTGAATACGTTACATCGGGTACGCAAAGCCATCGTCACCGTGTACCC
AATTTCTAACACCGTGTACCCAAACCGCAAGAACCTCTCTTTGGGTACACTTTTGTGTAC
ACAATATCTTGCATCTTTATGAACTGTTATGACAACTAGTGATAATAAAAAAGCCCGCAA
TATGCGGGCTTATAAGGTTTTGTAGTGTTTAGTGAATCGTGATGATTCGTTATTTGCTTT
TCTTGATATGCTTCATCAAACGCTTACGCTTGCGCATCTGGGTTGGCGTCAGGGTATTAC
GCTTGTTCGCATACGGGTTTTCCCCTTCTTTGAACTGAATACGAATCGGCGATCCCATTA
CGTCCAGCGATTTGCGGAAGTAGTTCATCAGGTAACGCTTGTAGGAATCCGACAGGTCTT
TCACCTGATTACCGTGAATCACCACAATCGGCGGGTTATAACCACCGGCGTGGGCATATT
TCAGCTTCACACGACGACCGCGTACCAGCGGCGGTTGGTGATCTTCAACAGCCATCGTCA
TGATGCGCGTCAGCATAGAGGTCCCCACACGACGGGTGGAGCTGTCATACGCTTCACGTA
CTGATTCAAACAGGTTACCAACACCACTGCCGTGCAAGGCAGAGATAAAGTGCACACGAG
CAAAATCGATAAAACCCAGACGGAAGTCCAGCGTTTCTTTCACCTGCTCTTTCACTTCCT
GGCTCAGGCCATCCCACTTATTCACCACAATGACAAGTGAGCGCCCACTATTGAGAATAA
AGCCCAGCAGCGAGAGATCCTGATCGGAAATACCTTCGCGGGCGTCAATCACCAACATCA
CCACGTTGGCATCTTCAATGGCCTGCAACGTTTTGATTACCGAGAACTTCTCTACCGCAT
CGGTGATTTTGCCGCGTTTACGTACGCCAGCGGTGTCAATGAGCACATACTCACGTCCGT
CGCGTTCCATTGGAATGTAGATACTGTCACGCGTCGTGCCAGGCATGTCGTAAACAACAA
CGCGCTCTTCACCAAGAATACGGTTAGTGAGTGTAGACTTACCTACGTTCGGGCGACCCA
CAATCGCCAGTTTGATCGGCAGACTTTGCGGGTCGAAGTCGTCTTCCTCTTCTTCTTCGC
CGTTCTCTTCCGCTTCAAATTGCGCCCAGTATTCGGCGTCTTCGTCGACTTCTTCTTGCG
GTGCGAGATCTTCCATCCACGGCAGCAGCACGTGCTCCAGCAGACTTAATACGCCACGAC
CGTGAGACGCGGCGATCGGGTAGATTTCACCTAAACCAAGCGCGTAGAAATCAACCACTG
CCTGATCGGGATCCAGACCGTCAGTTTTGTTTGCCACCAGGAAGGTCGGTTTTTCACGGG
AGCGCAGATGTTTGGCAATCGCTTCATCTGCCGGCATAAGGCCCGCGCGCGCATCCACCA
TAAACAGTACGACGTCCGCTTCTTCAATCGCCAGCAGCGACTGTTCCGCCATGCGGGTTT
CTACACCGTCTTCTGTGCCATCAATCCCGCCGGTATCAATGCAGATAAACTCACGGCCTT
CAATTTCCGCACGACCGTACTTACGGTCACGAGTCAGACCCGGGAAATCCGCAACCAGCG
CATCTCGGGTGCGAGTTAGACGGTTAAATAACGTGGATTTTCCTACGTTAGGGCGCCCGA
CAAGCGCGACCACAGGTACCATGTTTAAAGCCTCATTTTTATAAATCATCAGACAACGCA
CGCTATATTCGTGTCGTTGTTAAAAACAGGAAAACGGCCCCTGTCCAGGAGCCGTTTTCA
AAGTGAACGACAGAGACGATTAACGTGTAATAGAGTACACGGTTCCGTCTTTTGCCTGGA
TCAGCAGTTTGCCGTCAGCAGCAACCGGTTCAGTCTGGAAACCGGAACTATCAACTTTTT
GCTGGGCAACGAAACGACCATCTTCGACGTTAATCCAGTGCAGATAACCTTCACTGTCAC
CTACCACCAGGTTGCCATTATACAGCACCGGAGAAGTCAGCAGGCGATGCAGCAGATCGC
TTTGTGTCCACAGCGTAACGCCGCCATCAATGGTCAACGCCATCACCCGGTCATTTTGAT
CGACCAGATAGATGCGATTGCCGTCGACGATGAAATCATTCACCGAACCCAGTTCGCGTT
TCCACATAATCTGACCGCTGCGCAGATCAAGCGCCGTCAGGTTACCATTATAGGCCAGCG
CGAAAACAACGCCGTTAACAACGACGGGAGTCGTGTCAACATCGCTCAGACGGTCAATTT
CGGTAGAACCGGTCGCCTGGGAAATACGCTGCTGCCAAATCATCTGGCCCTGTTCCATCA
GCACTGCGCTGACGCGACCATTATCGCCACCCACGACGGCCGCACCAAAAGCCGTTGCCG
GCGCAGACTCGCCACGCAAAGAGAGCGAAGGCATATCGAGGTTAACTGTCCATTTGACAG
CGCCGTCAGCTTCGTTCAGCGCTTGTAACTGACCGTTACTGGTGTGGATTAACACCAGAC
CGTCGCTGACCACCGGGCGCGAAAGTGCTTCACCCGCGACTTTAGTTTGCCATGCCACAG
TACCATCGCTGGTATTCAGCGCGTAAACCTGCGCCTTTTCGGTGCCAATGTAGACATGCC
CACCAGACACGGTCACGCCGCCAGAAAGTAATGCAGGATCTTTAGAGAACCAGCCATCTT
TCTCGGCCAGGTTGACAGACCAGATTTCTTTGCCGTCATCCGCATTCAGCGCTTTTACTA
AACCAGCGCGGTCCGCTGCATAGACAACGTTGTCCGCCAGTGCCGGATGAAGATTGGAAT
AGAAGTTGCCAATGCCGCTACCAACGGAAGTGCTCCACACAGTAGTCGGCGTAAACTGGT
TTTCAACGGTTGGCAATGGGGACATCTTTACCACATCTTCTTCGCTGTTAAACAGCGAAC
AGCCGCTTAAAAGGGTAACGGAAAGCAGTCCTGGCAGCAGTAATTTACGCAATTGCATCG
GGTCCCTCTCAGATGGACAAATTATTAATTTTCATCTGCATCATTTCGCTCAGTGCCGGG
GTAACATCGCTTTTCACGCCTGCTTCCCATGCACTACGCGCACCTTGCTTATCACCTTTG
CTCAGCAATGCTTCACCACGCAGGTCGGCAACAATGGCAGCCCACCCTTCACCTTTGATG
GTATCAAGGGTTTTTAACGCGGCATCAGCCTGCTTGAGCTGTACCTGAACGCGAGCAAGA
CGCAGATTTATCACGGCTTTGAGATTTTCATCGCTCGTGTCTGCCAGCCCCTGTTGTAAC
TGGGCGGCAGCTTTCTCTAGTTCATTTTTGTCAACAAATTGCTGCGCAAGTTCCAAAGAA
GCCAGCACACCATAAGTATTTTTATTTTCAGCAGCAAATTTTTCCGCCGCTGGGATGCTA
TCCGGTTTGCCTTCGCTCACTGCGGTAACCGCATTTTGATAGGCAAGAGAAGCGGAGCGT
GCAGAATCAACCTGATGGCTGTTCCAGTAGCGCCAGCCAATCAGTGCGCCAACGCCCAAA
ATCACCCCAACAGCCAGTGCTTTGCCATTTTCAGCAAAAAAGCGTTTAACCGCTTCAACC
TGGTCGTTTTCGTTCTCGTAAATTTCCACGCTGTCCTTCTCCTTCCTTAACCCAGTAACG
TGCGCAAATGCGCGGCTACGCTATCCTGCGCAACTGCAGTTTGCTCACCAGAGCGCAAAT
CCTTCACTACTGCTGTGCCGTTAGCCACTTCAGACTCACCCAGCACCACAGCAACGCGGG
CACCCCATTTATCAGCACGGGCAAACTGTTTCTTAAAGTTGCCGCCGCCGTGGTTGGTCA
TCAGTTTCACGCCCGGTAATTCATCACGCAGACGCTCTGCTAATGCCATAGCCGCAGATT
GTGTGTCAGCACCTGAAGCCACCAGGTATATATCGACAACAGGATCGGCTTTAAATTCCG
GATTAACGGCCTGAACTAACAATACAAGACGTTCGAGGCCCATAGCAAAACCGACTGCCG
GTGTTGCACGACCACCCAGTTGTTCCACCAGACCGTCATAACGACCACCTGCACACACGG
TGCCCTGGGAACCGAGGCTGTTAGTCACCCACTCGAAAACGGTACGGTTATAGTAATCCA
GACCGCGCACCAGACGCTGGTTTACGGTGTAAGCGATCCCCGCGCTCTCAAGCAGTTTGC
ACAGACCGGCAAAGTGCTCACGAGATTCCTCGTCCAGATAATCGCCTAATGCCGGAGCGT
CGTTGAGAAGCACCTGCACTTCCGGATTTTTTGAATCCAGTACGCGCAGCGGGTTAGTGT
ACATGCGGCGTTTGCAGTCTTCGTCCAGCTTTTCTTTATGCTGCTCAAGGAATGCCACCA
GCGCATCGCGGTAATTCGCACGAGCTTCCAGCGAACCGATAGAGTTCAGCTCAAGAGTTA
CGTGCTCGGAAATACCCAGCGCGCGCCACCAGCGGGCAGTGAGCATAATCAGTTCGGCGT
CGATATCCGGACCTTGCAGACCGAAAACTTCGCAGCCCAACTGATGGAACTGACGATAAC
GCCCTTTCTGCGGACGCTCGTGACGGAACATAGGCCCGATATACCACAGACGCTGTTCCT
GATTGTACAGAAGACCATGCTCGATGCCGGCGCGTACACAGCCCGCCGTCCCTTCAGGGC
GCAGAGTCAGGCTGTCGCCATTGCGATCCTCAAAGGTGTACATCTCTTTTTCAACCACGT
CGGTGACTTCACCAATCGCACGTTTGAATAGCGGGGTCTGCTCTACAATCGGCAAGCGGA
TTTCACTGTAACCGTAGCTGCCGAGCACGTTTTTCAGTGTGCCTTCAATGCGCTGCCAGA
TGGCCGTTTCGCCAGGCAGGTAATCGTTCATGCCGCGAATGGCTTGAATGTTTTTTGCCA
CGTTTATTCTCTTTCTGAATATAAAAATGAACCCTCAACGCTTCCCTCAATGTTTCGGGA
GCCATGCGGGTTCAATCATACACGGGAAGCGAGGCGCTTCCCATCACGTTATTATTTTTC
AACCTGCTGAACGTCAATTCGACGCGCTTCGTCCAGCTGACTGGCTTTCGCACGAATGCG
TGCTTCCAGCTGGTCGATCATATCGTTGTTGTCCAGACGGTCTTTGCGCACGCCATCTTC
ATAGAGGCCGCTTTTCTTGTTGCCGCCGGTGACGCCGAGTGTAGAAACCAGCGCCTCACC
AGGGCCATTCACCACGCAGCCGATAATCGAAACGTCCATCGGAGTGATGATATCTTCCAG
GCGTTGCTCCAGCGCGTTAACCGTACCGATAACATCAAATTCCTGACGCGAACAGGTCGG
GCAGGCGATGAAGTTGATCCCGCGCGAACGGATACGCAGCGATTTCAAAATATCGAAACC
GACTTTGATCTCTTCGACCGGATCGGCCGCCAGCGATACGCGCAGCGTGTCGCCGATGCC
TTCAGACAGCAGCAGACCTAAACCAATAGCGGATTTTACTGCCCCGCTACGCGCACCACC
GGCTTCGGTGATCCCCAGATGTAGCGGCTGATCGATTTGTTTTGCCAGCAAACGATAAGA
CTCAACAGCGAGGAAGACGTCAGACGCTTTCACGCTGACTTTGAACTGATCGAAGTTCAG
GCGATCGAGATGATCAACATGACGCATGGCAGATTCCAGCAACGCCTGCGGCGTCGGTTC
GCCATACTTTTCTTGCAGATCTTTTTCCAACGATCCGGCGTTAACGCCAATACGGATCGG
AATGTTTTTATCGCGCGCACAGTCAACCACCATGCGAATACGCTCTTCATTACCGATATT
GCCAGGGTTAATACGCAGACAATCGACGCCGTATTCCGCTACTTTCAGCGCAATGCGATA
GTCGAAGTGGATGTCAGCCACCAGCGGCACGTTAACCTGCTGTTTGATGAGTTTGAACGC
TTCTGCCGCGTCCATCGTCGGTACGGAGACACGGACGATATCAGCGCCAACACGTTCCAG
CGCCTTGATTTGATTGACCGTTGCTTCGACGTCTGTCGTACGCGTATTGGTCATGGACTG
TACGGCGATGGGAGCACCATCGCCAATCGGCACATTCCCAACGTAAATACGTGTTGATTT
TCTACGTTGAATTGGAGCCTGGTTATGCATGAAAAATCTCCCGCGTTACCCGTCTGTTAC
TGCGCCGGTGATTGTTCGGCATTGAGGGTCAGACGCGCAACCTGGTTAGTTCTGATAAAA
CGACTCAGATCGACAGGTTTCCCTTGATACTGGATCTGTACTGCGGCTGGCGCACCAATT
TTCAGTTTGTACGGTGCCTGGCCGGTTAAGTTCAAATTACCGTCTTTACGCTGCATACCG
CTAAACAGTTTTTTACCGGTAGCATCGGTGACTTCCAGCCAGCAATCGGCAGTAAAGTTC
ATCACCAGCGCATTCGGGTCAACCGCCGGCGTGGTCACGCCAGCCTGATCGGTTGGCAAC
GGCGCAGCGCCATCTGGTGTTGTTGTTGCCGCTGGTGCCGGAGTCGCAGCGGTATCAACA
TTTGCCTGCGAAGGTGGAACAACCGCATTCTGTTGCGGATCAACAGCTGGTGCTGGCGCA
GTTACGGCAGGTGTTTGCGTGTTGGTTGCGGTGGTATCCACAGGTGATGTCGGCGTGGTC
GCCATAGCCTGATCTGTGGTTGTCGACGTATCTAACGGTACACTCTGGCTTTGATTATTA
TTCAGTTCCGCAGAAGATTGATCGGCCATAGTGGTGATCTCTTCCTGCTGAGCTTTGTGG
TCTTGCCACCACCAGGCACCGCTCAGGCCAATAACCACAAACAACACCAGCCAGGTGAAG
GTCATCAGCCAGCCGTCACGTTTTTTGCGGCGTTTACCGAGGGAAAAACTCTGCATCGGC
GCAACTTTTGCAGCCCGTAGTGGAGCCTGCTTTTCCAGCCCTGGCAGCAGTTCTTCTTCT
GGAATATGTACCAGACGCGCATAAGAGCGGATATATCCGCGCAGGAATGTTGAAGCAAGA
TCGGCGGGTGCCTTATCTTCTTCAATGTCGCGTACCGTGGAAACCTTCAGGCAAAGTCGC
TCGGCAACGGCCTGTTGACTAAGTCCTAGTTGTTCGCGAGCATTACGCAGGCGAGCGCCG
GTAGTAAGTGCTTCATTTTGGTCGTGCGTGGCTTCAGTATTCATTCGCTGCAGGTACGTT
TAAATGAGAATTGAGATGCCGGTGAACCATCATGCTCACCCACACCGCGAAACATCCGTT
AAGTTAACCGTTATCATACAGTATAAGACCGTCTGTGTGCTCGTGACAAAGCCCACATTC
GCTAAGGCTAACTTACTGTTGCATCGTTACATACTGCCTTAAAGTCAGCAAAAACGCACC
GTTAATATTGACCAGACAATTGCAACTTAATACTTCATTCATAAAAGATTACGCCACGGT
ACATAAAGTAACCGTGGCGTAATGGCTATCAGACCGCTTTAATGTCGATGGCTTCACCCT
GCATCCGTTTACGCAGGGTACGTTTCGTACGGTCGATAACATCGCCCGCCAACTGACCAC
AGGCAGCATCAATGTCATCACCACGCGTTTTACGCACAATAGTGGTGAAACCGTAGCTCA
TCAGCACTTTTGAGAAACGGTCGATACGGCTGTTCGAACTGCGTCCATACGGCGCGCCCG
GGAACGGGTTCCACGGGATCAGGTTGATCTTACACGGCGTATCTTTCAGCAGTTCTGCCA
GTTGGTGCGCGTGTTCAGTGCCGTCGTTAACGTGGTCAAGCATCACGTATTCAATAGTGA
CTCGGCCCTGATTGGCGTTGGATTTCTCCAGATAACGGCGCACCGCCGCAAGGAACGTTT
CGATATTGTACTTTTTGTTGATCGGCACAATTTCGTCACGAATTTCGTCGTTCGGCGCGT
GCAGGGAGATAGCCAGCGCAACGTCGATCATATCGCCCAGTTTATCCAGCGCCGGAACCA
CACCGGAAGTGGAAAGCGTGACGCGACGTTTTGACAGGCCAAAACCGAAATCATCAAGCA
TGATTTCCATCGCCGGAACGACGTTGTTCAGGTTGAGCAGCGGCTCGCCCATCCCCATCA
TCACTACGTTAGTGATTGGGCGCTGACCGGTGACTTTTGCTGCGCCGACAATTTTCGCCG
CACGCCACACCTGGCCGATAATTTCCGATACCCGCAGGTTGCGGTTAAAGCCCTGCTGGG
CGGTGGAACAGAATTTACACTCCAGCGCACACCCCACCTGCGAAGAGACGCAGAGCGTGG
CACGGTCGTCTTCCGGGATATACACCGTTTCAACGCGCTGATCGCCAACGGCGATCGCCC
ATTTAATGGTGCCGTCAGATGAACGCTGTTCTTCAACCACTTCCGGTGCACGGATTTCCG
CCACCTCTTTCAGTTTGCCGCGCAACACTTTATTGATGTCGGTCATCTCATCAAAGTTGT
CGCAGCAATAGTGATACATCCACTTCATCACCTGATCGGCGCGGAAGGGTTTTTCACCTA
AATCTTTAAAAAACTCCCGCATCTGCTGACGGTTGAGATCCAGCAGGTTGATTTTTCCAT
CTTTCGTGGTGACGTTTTCAGGTGTGACTAATTGTTCAGACATATGCTATTCCGGCCTCG
TTATTACACGTTATGGCCCCTGGAGGGTTGAAAAAGAAACGCCCCGGTGAGCGGCTGCTC
GTCCGGGGGCGCTGCATTGTACAAATTCTGGCGCACGGATGCCACGTTTGCACGCGGCAT
TTACGAAATTATTAACGGGTGCGCGGGCACACTTCGCCTTCGCCGAAGAAATAAGCGATT
TCGCGAGCGGCAGATTCGACGGAATCAGAACCGTGGGTACCATTTTCGGTCAGGCTGTCA
GCGTAATCAGCACGCAGAGTACCGGCCAGTGCATTTGCCGGATTGGTCGCGCCCAGCAGA
TCGCGGTGACGCTGAACAGCATTTTCACCTTCCAGCACGGAAACAACGATCGGGCCAGAA
GTCATGAATTCAACCAGACCATCAAAGAACGGTTTTCCATCGTGTTCAGCATAAAAGCCA
CGAGCCTGTTCAACGGTCAGGTGCAGCATTTTGGTGCCGACAATTTTGAACCCTGCAGTT
TCAAAGCGCGCAAAGATACTACCAATCACGTTTTTTGCTACCGCGTTCGGTTTGATGATG
GAAAAAGTACGTTCAATAGCCATTTTTACCTCTGTAAATTGTTCTGTTGTTGTCTGTACC
AGCGTACGAGATGGCGCGGATTATAATGAGCAACAGAGCCGTTGACTATTGATGAAGGTA
ACATTTTTTTAAAATAAACCCAGTTTAAGCAACAATCAGGGACAAAACAGACTATTGCAT
GACAAATTTCACTGTCGCTATTTGCCCCACGTCATCCATCACCAGCAATTGATAATCGCC
TTTATCCGTCAAATGCAGGGTCACGTTGCGCCCACGTTCAGTTAACGGTTCGCCGTTCAG
AAACCACCAGCGTTCACCTGCCCCTCCACTTGATTGCAACGGCAAAGTCGCTTCCGCTGC
GCCCGGTAAACGTTTAATAATCGCGCCATCGCGCACACCTGTTAGCTGCAGCGGGAGTTG
TGCATCGTGACCGTATGGCGGGCAAATTGTCGAGGCCGGTGGCAAGCGCACAGCGCGACG
TTCTGATGCGGGCAGCCAGGGTTCCAGCGGTAGCGGCCAGACATTTATCATTTCTTGTCG
CGCCTGAGGGCAATCAGCGGCAACACGTTTGCCGTTTTCATCCAGCCAGATGGGGAAACG
AATGCCATTAATGCCTTCCTGCTCCGGCAGTAATAGAGTTGGCGGCTGGCTCCCGTCCAG
CAGCCAGGTTGCCAGGCGGCGGCGACAGTTACCGTCACCTTCCGGCAAAGACTGTCCGCC
CGGCCAGCAGATAACGCCACGACTTACAGAGTCAGGACGTGGGTCTTCCGGCAAATTCAC
ACTGCGCGACAGTAAGATATTATTAACCTGATTCAACAGCGGTACGGCACAGGCAAAGCC
AAACTGACCAACAACGGGCGTACCGTCCGGTCTGCCAGTCCAGATCCCGATGACATAGCG
AGCGTTAACCCCAATCGCCCAGGCATCACGATAGCCATAGCTGGTGCCCGTTTTCCATGC
CAGTGGGGCGACGCGCGGCAAGGCACCATCCGGCAAGGGTTGCGCTTCATCAGCCATAAT
CCGGCGAATGATCCACGCAGCCCCCGACGACATTAAAGGCCGTTCAAGCAGCGGATCGTC
AGGCTGTAAGCGCAATTTGCCTGCCTTGCCGTGGCGAGCAAACGCGGTATACGCTGCCGC
CATATCTTCCAGTTTTGCGCCAGCGCCGCCGAGAATGAGCGAAAGATTTGGTGCAGCACC
GTTGGGCAAATACAACGGCAATCCAACATTGCGTAACTTTGCCGCAAACCGTTTCGGTCC
ATAGGCTTCCAGCACCTGCACAGCAGGTAAGTTCAGCGATCGCACCAGCGCCTCACTCAT
GCTGATCGGACCATGAAAACCGCTGTCAAAGTTGCCAGGTCGGTAATCACCGGTGCGTCG
GGGGACGTCTTGCAACAGCGATGCCGGATGGATCAAGCCTTCATCCAGCGCCAGACCATA
AACAAACGGTTTGAGCACCGATCCTGGCGATCGGATCGCATTGACCATATCAACATGACC
AAAGCGTGAATCATCGTTGAGATCAACCGATCCCACCCAGCCGCGAACACGCATATCGGT
ATGATCAACCACGATCATCGCCAGTGAGCTGCGCGGTGGCAATCGTCCTTTCCAGTTTTG
CGCCAGTTCTTCCAGACGTCGTTGAAGACCGGCATCCAGCGTAGTAACGATTTTGTCGCT
TTTGCTTTTACCGAGCATCATGCGCGAAAACAGCGGTGCCAGTTGCGGCATTTGTCGGGG
TGCCAGCCAGATGGGTTCTTCCCTTGACTCTTTTACCCGCTCACGGGACCACACACCTTG
CACGGCCATCCGTTCGAGCACTTTATTACGCGCGGCTTCGGCACGCTCCGGCCAACGATC
CGGGCGAAGACGGCTGGGCGCTTGCGGCAAAACCGCCAGCATTGCCGCCTCGGAATAGCT
TAAATTCGCAGGCGATTTCCCGAGGTAAGCCCAACTTGCCGCACCAATCCCCTGCAACGT
ACCGCCAAACGGGGCACGGTTAAGATACAAGGTCAGAATTTCACGTTTAGACAGATGCCA
TTCCAGTTGCAACGCGCGCCAGAGCTGGCGAATTTTGCCGCCAAACGTTTTGGGGTGAGG
ATCAAGCAGGCGCGCCACCTGCATGGTGAGCGTGCTGCCGCCGGAAATGACCCGACCCGA
CGTGAGATCTTGCCAGGCTGCACGCGCCACCGAGAACGGATTCACCCCCGGATGCTTCCA
GAACCAGCGATCTTCATAATTGATCAGCGCTTCAAGGTAACGTGGAGAAACATCTTCGAT
TGTTACCGGATAACGCCAGATGCCGTCAGCATCGGCGAAACGCCAGAGTGGCGTACCATC
CTGCGCCACCACCACGCGTGCAGGATTCACTTCTTGCAATGGCAGAGGCCAGAGTTTATC
TGCTGCCCATGCTGCCAGAATGATGATAAAAGGCGCGGCTGCCAGCATTATCCAGCAGCC
GCGTTTGGTTAACAGGCGAGGCATTTACGGTCTGACTATCAACAGATCGTCAGCCGCACC
AGTCGCCCGCCATTGGGGAACATACATTGATTCCACCATCGGTTGCGGTACCTGATACGT
TCCCGGCGTCACCGCCCGCGCCAGATACACCAGCGTTACCGGTTGGTATTCATCAACGGC
AACCGCCGCCACAAAGCGATCGTCACGGAACTCAATGTGCTTAATGCTCGCCTGCTGCAT
CTGGTTCAGTAAGTTTTGCACTTCGCCACCACTTTGCTCCAGGCTGGCGCTACCGTTCGC
CAGATTCTGATTTTCCAGTTCCAGACCCGCAGGCAGCAGATCAACGACTAACGCATCCGG
CACGCTGTTACTGGCTTTAACCTGCAACCAGACCAGCACCAGATCGCCGCTACGTAACGA
GTCCAGCGATTTGCTCTTACCATCAGTACCAAGAATATGACGCTCGATTTGCAGCACATT
GTTCGCCGGTAAAGGTGCGGATTGCGGATAACCGCTGGCATCCACACGCAGCCATAACGG
CTGATCGCCACTGTTGGTCACCTGCAAGGTGGCAAGTTGATCGCTATTCAGATTGCTGTT
TTGCGCTTTCTCGCCTGTCAGCGGCTCAGTTGAGAAAGAGGTTTGCGCCTGCCATTTACC
CGGTAAATCCTGGATCGTACGGGCAGCCAGGAACAACGCGTTACTTTCCTGCGTCGATAG
CCAGCGTTCACCAAACGCCTGCTGCGAAAGCGTGTTCAGCAAAGTGTTTTGCTCATCGGG
TAGCAGTTTATTTTCTTCCAGCAAGGAGAGCATCAACGCGTTGTCGCGCAGTGGACTACC
GTAATCACCCAGCCATATCCGCTCATCACTATTACGCGGCGTTTTCAGCGCCAGCACAAT
CGCTTCATCACCACGCGTTGCATCACCCATGGTTTTCAGCGCAACGCCAAGTTGCAGCAG
CGGTAATCCAGAAGCAGCATCTGCACGATGCTCCCAGATTTCACGCAGCGCACCCAGTGG
TGCTTTTTGCTGACGGGCCAACACCAGTGCAGCGTAAGACTGTACGGCGAATTTACTGGC
TTTGAGATTATCCGCATACGGGATCGACATCATGCCCGGATCTTGTAAATAGCGCAGCAG
ACGCTCATTACCCCGGTTAATGGCGTCTGTCGGCACGCTGTAACCCTGTTCGCCTGCGCG
GACCAGGAAATCCATCACGTAAGCCGTCAGCCAGTACTCTTCGTCACCGTTTTTATCCCA
CAACGCAAAGCCGCCGTTATCACGTTGCATTTGCAGCAAACGGGAAATGCCGATATCGAC
CGATGCACGGCGTTTCTCATCACTGTCGCCTTTGATGCCCAACGCCTGCAGTTGGGCTGC
ATTGGTATAAAGTGACGGGAACAGGCCGCTGGCGGTTTGCTCGAGACAGCCGTACGGATA
CGCTTTTAACTCTTTGATATAACGTGCGATGTTCAGCGGTGGTTTGCCACTCAACAACAA
TTGCCCTTCCAGCGTAACAGGCGAGAAGTTTTGCAATCCATCAGCCGGGAGCGCCCAGGT
TTCACCAGGCTGTAACGCCGTACCGTAATTGACCGTTTGTGCCGGGAATGCCGGACGGAC
GCCGATTTTCCACTGCTTATGCTGATCGGCAACGGTTTCCCCGGTAACGCTAACCCGCTA
ATGGTGGCCTGAATGTCTCCATCGCCATAACCCGGCAATGCACGCACCGGGATAAACAGC
GTAGTACGCACCCCTGGCGCTAATTCAACAGGTGCGGGGGAATTACTCACCAGTTCAAGC
AAGCCACTGGCGGTCAGAGCAACATTAAGTTTTTGCGGTTTATCGGTAAGATTAGTGATA
TCCAGCGTCAGGCGCGAGGTATCGCCACTCGCCATAAAGCGCGGCATGTTCAGTTCAGCA
ATCACCGGTGCGGCAACAATCACTTTGCTTTCGTTGCTTCCGAAGTCATCTGCCGTCCAG
GCTTGCGCCATGACGCGCAATTCACCGTTAAAATCGCCAATTGGCAGTGTAACCGAGCCT
TCGCCCTGTTCATTGAGCGTTACCGGCAGCGCCTGCTGCGCGACAATATTGACGTGATTG
ACCGGCGGTTTACCACCACGTTTCAGCTCATCACCATCGCCACCAAAACGCAGAGCTGCC
AGACGCCCCTGACCTTCAATGACCTGACCGTAAATATCGTAAATGTCTGCGCCATAGCGT
TTCTGACCAAAGAACGCCTGCCACGGATCTGGCGTGACGTAATCAGTAATATTCAGCACA
CCGCTATCAACCGCAGACACCAGCACATTCACCTGTTTTGGCATCTCACCATTTTTATTG
CTGGCTTTAATTTTCACGGTTAATGGCTGATTGGGGCGCATTTTGGTGGGGGTTTCCAGC
GCCAGATCGAGGCGACGGTTTTCATCACCAAGCGGCAGATGCAACACCCCAACCGCGCGT
TTTGGCGTCGCGGAGCGAGATTTATCGCCAGGACGTACCACCAGCGTACTTAAATACAGA
TCATGACGATTCCAGGTTTTATCGACCGGAATCGTCAGATCCAGCCCTTGAGCCGGAACA
TCAATCTCTTGCCACCACAGCGGCCCTTCACTGGACTCGACCATCGCATAACCTTTACCC
GCCGTTGGCGCGGCAATATGCAACTTAATGGTATCGCCAGGGCAATAGCTGGCTTTATCC
AGTTTCAGCGTGACACGGTCGGGTCGCACTGCACCACCCCCGTCGCTGTTATCCTGCCAG
CTATACCCAGCCCAGAAACGCACACTACTGACCGCTTCATTCGGCGCTTTAACTTCCAGA
CGATAAGCGCCCCACTCTACCGGGAAACTGACCTTACCGGTTTCGTCCGCTTTCAGATCC
AGAGTTTGTTCATTTTCGATCAGATCTTTTTGATCAAACTGTGACTGCCAGCCTTCATAT
TCCGACCAGTTCCAGTAGTAATCGCGGCGTTCGCGAATCAAGCGCACCTGCAAGCCCGAC
ACGGCTTTTTTCACGCCTTGCGCATCGCTATAAACGATGTCAAAAGCGGCGTTACTACCT
TCATCAACAATGGGCTGTTTCACCGTGCTGTCGGTGCGATAATCGTAAACCGATTTCGAG
GCGAACTGCGGACGGATCCCTGGCAATGCATCAGCAGGCCAGATAGCCTGCTCAGCACGG
CGCGTCACCGGGCGACCGCCCGATTCCAGCAAACTACCCTGGAAAATAACCTGTAATGGG
GAATGCGTTTCCTTCCACTGGCTTTCTGTAGAAACTTCGCCGCGCCCTTTATCATCCAGC
GTCAACTGAACTTCATCCAGCGTGCGGGAAAGATTTTCGGCAGCTATATCTCCGAATTCA
AAACCAGGTAAGGCTGACACAGCTTCACGCAGTGGGCGCAGGAAAAGTTGCCCTTGCAAA
GTATTACCATTAGCAGGTGCACCATACAGGTAGTACCCCACCACGGAGAATTTCACTTCA
TCTTTCGGCGTTAGCGGGGTTTTCTCACCGGTCAGATTCAGCGCCATACGCTCTGGCATA
AAATCTTCGACGTGGAAATCCCACATCCGATACTGGTTATCGCCCGTGTTAGCGCGAATA
TGCCACATACCGGTTGCCGCATTGCTATCGAGTGGCCAGGTAAAGTGGTAGAGGCCATTC
TCCGGCTGACTAACGACACTCCTGAGTACCTGCCCGTCGGGTTTAATCACGTCTAACTTG
ATGGGTTGATCGGGCAATGCTTTACCGTCTGCATCACGCAGCAAACCATTGAGGATGACC
GTTTCACCCGGGCGATAAAGATCGCGCGGGCCAAACATGAAAAACTGTTTGCTATAGCCC
GGCGCGCCAGCAATGTTAAATTCCGCTAAGTCCAGCGCCGGGAGTTTTAAATCGAGCAGC
GTTGTCTGACCGTTTTTACGCGCCAGCAGTAATGCCGCGTTTTTATCATTTTCCAGCTGC
ACATGCCCCTGAGCGTCACTGGTTGCCTGAGTCAGAGTCTGCCCTTTCTCATTTAATAAA
GAGACTTCAATTCCTTGCTGGGCTGCGCCGTTTTCCAGACTTTGGGTAAAGATATCCAGA
CGATTGTGATAACGGTGAGCTGAAACGCCAATATCACTTAACGTAAACAGCGTTGCGGGA
TTACTGTAATCGTAACGTCCAGCCTGATTCATCACAGCCAGATACACGCCCGCCTGCTGA
AGCGGTTTGATATCGCCCAGCGGCAGCAATAATTTTTCACGGGTGTTACGCGCAGGATTG
AGATCAAACCGTCCGGTGTAGACCAGATCCGCCATCTGCAGCAGTTTGTCTGACTGCCAG
TTCGCCAGCGAATTGCGGTATTCCCATTGGCTAATGAATGCTGGCAGAGATTCTGGCTTA
ACGCGGAAGAAGTTAACATCGACATTATTAACGTTGAGCGCCATTACCGGCAGCCCTTCA
ACGACTTTGCCAGGCAGCAGCGAACCACGGCTGGCAAAACCGACGCTGGGTTGGATATCG
CGGGTAGTTATAGTTTTTTCGTCATCTTTACTAAAGGTTGCGTTATTGAGCGCTTTGACC
TCCTTGCCAATAGTGACGATCAAATCACGTTTCGGTTCGAGGTGGCGTAAACGCAGCTCT
TTAAGATTATCTGACAGCTCCCAGGCACCATCCACTTTGCCGCTTTTTTTATCGACGACA
TGAATAACGCGTGAGAAATCCTGATCCGGGTCGAGAGGTATGGAGAACGTCAGCACCAGC
GTGGCTGCGCCATCGAGTTGAACTTCAGAGAGATCCAGCAATGTCAGCGCCTTACCGGCA
CTCTGTTGGGCCAGTTTTTGTCGCTCCGGCGCGGAAAGTTTTGCTGAACTCACGTTTTCT
GAAGAGGCCGCTTTAGTAACTTCAGAAGGCGCATCTTTTTTCACCGCTGTTGGCGCGTTA
TCGTTGTTGTCGCACCCTGCCAGCGCCAGCATTAGCATGCAGGCGGCTACGCGTAACTTT
TTCATTTTTCATCCCTGCCACAATGGCCCGTTAGCAACGTCGAATAATTATTATGCGTGA
GAATTTACGTTATGTAATTCAGTATCACGCCCATACAATCCGAATTTTAGTGAGAATTGT
GGCTCAGACAGCCAAATCAGCCTCTTTTGCTTGTCGCTTTTCACTAAACATCCGACAATT
TAGCCTAACCCCGGCAAAAATGGAGATGCCTATGTCCACGACATGGTTTGTAGGAGCCGA
CTGGCTCGCCGAACATATTGATGACCCGGAAATTCAGATTATCGATGCCCGCATGGCGTC
GCCTGGACAGGAAGATCGTAACGTTGCTCAGGAGTATCTGAATGGACATATTCCCGGCGC
AGTGTTTTTTGATATCGAAGCGCTTTCTGATCACACTTCCCCGCTTCCGCACATGCTGCC
GCGCCCGGAAACGTTCGCCGTGGCGATGCGTGAATTAGGCGTTAACCAGGATAAGCACCT
GATTGTCTATGACGAAGGTAATCTTTTCTCAGCCCCACGAGCATGGTGGATGCTGCGCAC
CTTTGGTGTAGAGAAAGTGTCGATTCTGGGTGGTGGACTTGCAGGCTGGCAGCGTGATGA
TCTGCTATTAGAGGAAGGCGCAGTAGAGCTGCCGGAAGGAGAGTTTAACGCCGCGTTTAA
TCCTGAAGCCGTGGTGAAAGTAACCGATGTATTATTGGCAAGCCATGAAAATACGGCGCA
AATTATTGATGCCCGCCCGGCTACACGTTTTAACGCAGAAGTTGATGAACCTCGCCCAGG
TTTACGTCGCGGACATATTCCCGGTGCATTGAACGTTCCGTGGACGGAACTGGTACGTGA
AGGCGAACTAAAAACGACTGATGAACTGGATGCGATATTTTTTGGTCGCGGTGTCAGCTA
CGACAAACCAATTATCGTCAGCTGCGGTTCTGGTGTAACAGCAGCCGTGGTTTTGTTGGC
ACTTGCGACGCTGGATGTGCCAAACGTGAAACTGTACGACGGCGCATGGAGTGAATGGGG
CGCACGAGCAGATTTACCGGTTGAGCCAGTGAAATAAGCTTTATACAGGCAATAAAAAAC
CGCCGAATCTGGCGGTTTTTTATTGCTGGTCTGGTTCGCGGCCTTTCCAGCAGGTTGTAT
TACCGTAGTAATGCAAGCGCGTCTCAGCGGACACAATACTCGCCAGTAACTCTCTTTTTG
TCAAGTAAAAGAGAGTTATTATTGTTCTGTTAGTGTATTATCCACTGCGGCCCTTTCCGC
CGTCTCGCAAGCGGGCGCTGGCTTAAGGAAAGGATGTTCCGCGACCGTTAGGGCAAGCGC
GTCTCAGCGCTTGCTATCGCGGCAATATCGCCAGTGGTGCTGTCGTGATGCGGTCTTCGC
ATGGACCGCACAATGAAGATACGGTGCTTTTGTATCGTACTTATTGTTTCTGGTGCGCTG
TTAACCGAGGTAAATAATAACCGGAGTCTCTCCGGCAACAATTTACTGGTGGTTAACAAC
CTTCAGAACAGCAAGTAAGCCCGAATGCCGCCCTTTGGGGCGGCATGTTTTAAATTATCC
GGTTCTGTTTAAAGTCACGCAAAAAACCACCCCAGCGACGTTCATAGAATGGCGCAATAT
GTTCGGTAATAAAGTGGCTAATTCCTTTTTCCCCTTTTTTCACCTGACAAATATCGATGG
GTTCATCGCCAGGTAATGTATCGGTCGCTACACTTCCCGCAGCCTGAATAATTTCTTCGA
TATCACCATCGGCTTCAATGCCAATAAGTAAATTAGGCTGTGCCTCTTCGTTCTCTTTAA
TTGAACAAATAAAAGCACGCTTCACCGGCTTAATGGTTTTAAATAAGGTGGTAAGTGAAT
CAATCATTTGCGCTGGCGGCTCTGCGACCTCCGATAATATCAGCGATTCACCGCCTTCCA
GTACTTCCTGACTGCTCAGCGGATTCCCTTCTTCACCAATCAGCAAACTGATTTCACGCG
GCATAAATTCTTTACCGGTTGGCAGTTTGGCATTAAGGAAGAGCGTTTCGCCAAGGGTCA
TCTCAAACAATGTGCGAACAGGCATTACGACAAATGCCTGTTCGCCTTCAACCGCCTGTT
GAAGTGCTTCTAACGAGGTGAAAAAGGAATGACGCTGGTGCCGTCTTCTTTTTCCAGTGC
TGTAAATCAAGTGCGCTATCTTCAACCACAGCCTCGCCCTGTGCCGCCGTACCAGGCACC
CAGACGGTGGATTCCAGTAGAGTACGGAAAAAGGCCGGGCGGTGCGCCGGTTCGGTTGCT
GCTTTTTCCAGCAGGTCTTCAAGTTCGTTTTTTGTTTCGGACATAAGAACCATAATTCAT
TCAACGTTCGGGGCGTAAGTGCCTGATGCGCTACGCTTATCAGGCCTACAAGGGAACCGC
AATATATTGAATTTGCAATACTTTGTAGGCCGGATAAGGCATTTACGCCGCATCCGGCAT
ATTAGTTTACGCCGTTAACAGATTAGCAATCGTGCGCACACCAAGTCCCGTAGCACCCGC
AGACCACTGTTCAACCGGCGCTTTACGGTAAGTCGCCGAGCAGTCGATATGCAGCCAACC
TTGCTGATAGTTCTCAACAAAGTGCGACAGGAAGCCCGCCGCTGTGCTCGCGCCTGCCGG
ATACGCCGCGCTTCCGGTGTTGTTCAGTTCGGCAAAGTTAGACGGCAATTGATTGCGGTG
GAACTCCGCCAGCGGCAGACGCCAGAACGGTTCATTCTCCTGCGCGGCACTCGCCAACAA
GCGACCGGCAAGCGCATCGTCAAAACTGAACAGCGCGTGATAATCATTACCCAGCGCGGT
TTTCGCCGCCCCGGTGAGGGTCGCCGCATCAATGATCAGTTCCGGTTTCTGCGCACTGGC
ATCAATCAGGCCATCGGCCAGCACCAGACGCCCTTCGGCATCAGTGTTCATCACTTCAAC
TTTTTTACCGTTGCGATAGGTAATAATATCGCCCAGTTTGAACGCGTTGCCGCTGATCAG
GTTATCCGCACAACAGAGGAACAGCTTCACGCGCTTGTTCAGTCCGCGCGTAATGGCAAA
TGCCAGCGCCCCTGTAACCGTTGCCGCACCGCCCATGTCCGACTTCATCGAGTCCATAAA
CGCGGTCTGTTTGATGCTGTAGCCGCCGGAATCAAAGGTGATGCCTTTACCAACCAGGCA
CGCGTACACTGGCGCTTCTTTATCGCCAGTTGGGTTGTAATCCAGCGCCAGCAATACCGG
AGAACGTTCTGAACCGCGCCCGACCGTGTGCAGCCCCATATAACCTTGCTCACGCAGATC
TTCGCCTTTGGTGATCCGGTAAGTCACACGATCGCCTGCGACGTTGCTGATCAGATCAAC
AGCACGCTGTGCCAGTTGCGATGGCCCCAGCTCTTCTGCCGGTGCGTTGATGGTGTCACG
CACCCAGTCGATGATCATCAGGCGGTTATCCAGTTCCTGACGCTGGGCATCGTCCAGATC
CGGCCACTCCACTTTACGTATGCCTTTCGGGGCTTTGTAACCTTGCCAGAATGCCCAGCA
GCGATCCGCATCCCAGCCTTCACCGCTTAACTGAACATGCTTGATGCCCAGACCGTCAAT
CTTGCGCGCCGCACGCTGGATCAACCCCAGATCGTCTGCCCCGTTCAAATGCAGGGTAAT
GCCATCATTATTAATGCTGTAAGTCGCTTTTTCTCCCCAACGTGCGTCGGCAGGTTGGGG
AGAGAGGGTAATCTTCATCGCTTCTGTCATTTTAGTTATCCTTATTCGTTTAACAGCAAA
ACGGGCTACCCCCAGGCAGCCCGTTCATTCACTCGGCTTCGTCCAGCCAGACCAACAAAA
TCGCTTCGAGGATTTTCTCGTTGGATGCCTGCGGGTCGTCGTCGAAATCTTCCAGATCGC
AAATCCACTGATGCATATCGGTGAATCGAACCGTTTTCGGATCAATATCAGGATACGCAT
CGTACAGTGCTTCGCCAATTTCGCGGCTATCCGTCCACTTAAGTCCCATACTAACCTCTG
TTAATGCTCACGCGCATGGTTGATAGTGTAACGCGGGATTTCGACCACTAAATCTTCGTC
GGTAACGCGCGCCTGGCAGCTTAAACGGCTTTCCGGCTCCAGTCCCCAGGCTTTGTCCAG
CATGTCGTCTTCCTGCTCTGTGCTTTCCGGCAGCGAGTCAAAACCTTCACGAACGATGCA
GTGGCAGGTGGTGCAAGCACAGGATTTTTCACAGGCGTGTTCAATCTCGATACCGTTACG
CAGCGCAACGTCGAGAATGGTTTCACCGCTATTCGCTTCCAGAACAGCGCCATCAGGGCA
GAGATCCTGATGAGGCAAAATAACAATCTTTGGCATATTAAACCTCGTCCACGGAATGGC
CTTTCAGCGCACGACGAACCGACTGGTCCATGCGGCGAGCGGCGAAATCCTGGGTTTGTT
TGTCTACGTTTTTAATCGCTTGTTCGATGGCGTCAACATCATCGCCCTGCGCCACTTCAC
TCAGGTGAGCGGCAGCATCGTCGATAGCCTGACGTTCAGCGGCGCTTAACAGCGCGGCAT
CAGCAGCCAGCGCACCGTGCAGACTTTCCAGCACACGCGCCGCTTCTACTTTTTGTTCTG
CCAGCATTCGGGCTTTTACGTCCTGCTCGGCATAGCTCATTGAGTCTTTGATCATCGAGG
CGATTTCGCTATCGGTCAGGCCATAAGACGGTTTGACCTGAATAGACGCCTCAACGCCGG
TGGATTTCTCCATCGCCGTCACGCTCAAAAGACCGTCGGCATCGACCTGGAACGTCACGC
GAATATGCGCACCGCCAGCCGGTAGCGCCGGAATACCTCGCAGCGCAAAACGCGCCAGCG
AGCGGCAGTCCTGCACCAGTTCGCGCTCACCCTGCATCACATGGATAGACATCGCCGTCT
GACCATCTTTAAAGGTGGTAAAATCCTGGGCGCGGGCCACCGGAATCGTGGTATTACGCG
GGATCACTTTCTCCACCAGGCCGCCCATCGTTTCGAGGCCCAGCGACAGCGGGATCACAT
CCAGCAACAGCATTTCGCTGTCCGGCTTGTTACCCACCAGAATATCCGCCTGAATCGCCG
CGCCAATAGCGACGACTTTATCCGGGTCGATAGAAGTCAGCGGTGGACGACCGAAAAATT
CGCCTACTCGTTCACGCACCAGCGGCACGCGAGTAGAACCGCCCACCATCACCACTTCCA
GCACTTCATCAGCTTCTACGCCCGCATCTTTCAGCGCGCGACGACAAGCCAGTAAGGTTC
GTTTTACCAGTGGCGCGATCAGTTCATTGAATTGTTCACGGCTGATTTCGCCCTGCCAGC
CCGCAACGTTAACGGTCACAGAGTCCGCATCGCTCAGCGCGATTTTGGCCGCAATGGCAG
CATCGAGCAGTTCACGCTGAACGCGGTTATCGCTACGATCAGGAATGCCCGCCTGCTCGC
GAATGTAATCCGCCAGCAGATGGTCGAAATCATCGCCGCCGAGCGCGGAATCACCACCGG
TCGCCAGCACTTCAAACACGCCGCGACTTAAGCGCAGAATGGAAATATCAAACGTCCCGC
CGCCGAGGTCATAAACAGCGATCACGCCTTCCTGGCCGGAATCCAGCCCGTAGGCAATAG
CCGCAGCGGTCGGTTCATTAAGTAAGCGCAGAACATGCAGCCCCGCCAGACGCGCCGCGT
CTTTGGTGCCCTGACGCTGGGCATCGTCAAAGTACGCCGGAACGGTGATAACGACACCAT
CCAGCTCGCCTGCCAGGGCTTCAGTTGCCCGCGCCGCCAGTGCTTTGAGGATGTCCGCAG
AAACGCGCACCGGGTTCAGCAGCCCCGCCGCCGTTTCAATCATCGGCAGGCCATTTTCGC
TGGCCTGGAATTGATAAGGCAGATGCGGATAGCGTTGCTGGATATCAGCCAGCGAGCGCC
CCATCAGGCGTTTAACAGAACTAATGGTGTTGGCAGTGTCGAGCGCTGCGTTAGTACGCG
CGTCATAACCCACCGAATGCCCTTGCTGTTGATAGTGAACAACAGATGGCAGCAGGTGAC
GGCCTTCATGGTCAGCTAACGTTTCGGCCTGACCGCTGCGCACTGTTGCCACCAGCGAGT
TGGTTGTGCCCAGGTCAATACCGGCCGCCAGGCGACGCTGATGCGGCGCAGCACTCAAAC
CAGGTTCACTAATTTGTAATAAGGCCATGTTTAGCTTCCAGAAATTAAAAATCGAGCAGT
TTTTCTTCGAGTTGTTCGGCACTGCTCCGCAGTTTATCGAGAAAACGCAGCTTACGCACG
GTATCCGCCGCCGCGTCCCACGTCTCGTTGTCTAACTGTTCAACCATCAACTGATGGCGG
GTATCAAACATCTTTTTCACACGTTTGATAAAGCTTTCCAGCCGCGCTTCATCTTTCGCC
TGTTCGATCTCGTCCAGTTCTTCGCGCAGTTCCAGCTGTTCCATCAGGAACGCGGTGTCG
CGCACAGTATGCTGCTCGCTGGCGAGATCAAAACCGTGCAAAGAAAGCAAATATTCCGCG
CGCATTAACGGATGACGCAGCGTTTGCCAGGCCTGGTTAATGGTCGCGGATTGCTGTACG
GCGGCGAGTTGTTCCGCCTGGCTTCCGCTGGCGAATTTATCAGGATGATACTGACGTTGT
AGATCCTGAAAACGCAGGCTCAGCGCCTGGGTATCGAGTTGATAACGGGCAGGCAAGCCA
AAGAGGGTGAAGTAATCCATAACATTCTCAGGGCTGCGATCCGCCGCGATAACGGCGAAT
CAGGTAAAACAAACCCCACGCGCAGGCGACCACGGTGGGGTTATCGGTATGCGCATCAAA
CGTGGAAGCTTTCGCCGCAACCACACTCATCTTTGACGTTCGGGTTGGTGAATTTAAACC
CTTCGTTAAGGCCTTCTTTGACGAAGTCCAGCTGCGTACCGTCCAGAAATTGCAGGCTTT
TGCCATCGACCACGACTTTCACGCCTTTGTCTTCAAACACGATGTCTTCCGGCGTCGGTT
CGTCAACAAATTCCAGTACATAAGCCATACCTGAACACCCGGAGGTTCTCACGCCCAGAC
GCAGGCCAAACCCTTTACCGCGGTTAGCCAGAAAGGTATTTACTCGCGCTGCTGCACTGT
CGCTCAGTGTAATCGACATAACCAAACCTCAACTCTTATTTTGCTTCACGTTTGCTTTTA
TAGTCCGCAATGGCGGCTTTGATCGCGTCTTCTGCCAGAATAGAACAGTGAATTTTCACC
GGCGGCAGTTCAAGTTCTTCAGCAATATCGGTGTTTTTGATCGCCTGCGCTTCGTCGAGA
GACTTCCCTTTCACCCATTCGGTGACCAGGGAGCTGGAAGCGATAGCGGAACCGCAGCCG
TAAGTTTTAAAACGCGCGTCTTCAATGATACCTTCATCGTTGACTTTAATCTGCAACTTC
ATCACGTCGCCACAGGCCGGTGCACCCACCATGCCGCTGCCGACGTTCTCGTCGTTGTTG
TCAAAGGAACCCACGTTACGCGGATTCTCGTAATGGTCGATAACTTTTTCGCTGTAAGCC
ATTATAAATTCTCCTGATTCCGATACCGATTAATGATGAGCCCATTCGATGCTGTTCAGA
TCCACGCCCTGCTTGTACATTTCCCACAGCGGAGAAAGGTCACGCAGACGACCGATGGAT
TTACGAACTAACTCGATGGTGTAGTCGATCTCTTCTTCAGTAGTAAAACGACCTAAAGAG
AAACGGATAGAGCTATGTGCCAGCTCGTCGTTCAGCCCCAGCGCGCGCAGCACGTAGGAC
GGTTCGAGGCTTGCTGACGTACAGGCGGAACCTGAAGAAACCGCGAGGTCTTTCAGCGCC
ATAATCAGCGACTCACCTTCAACGTAGTTGAAGCTGACGTTGAGAATGTTCGGCGCACCG
TGTTCCAGGTCACCGTTCAGGTAAACTTCTTCGATATCTTTGATGCCGTTCCACAGACGG
TTACGCAGGCCGCGCAGGCGTTCCATCTCGGTCGCCATCTCTTCTTTTGCGATACGGTAA
GCTTCGCCCATACCGACGATCTGGTGAACAGGCAGAGTGCCGGAACGCATACCGCGCTCG
TGACCGCCGCCATGCATTTGTGCTTCGATACGTACGCGCGGTTTACGACGCACATACAGC
GCACCAATACCTTTCGGGCCATAGATTTTGTGACCGGAGAAAGACATCAGGTCAACTTTC
AACTGGCTCAGATCGATAGGCAGTTTGCCCACGCTCTGGGTTGCATCAACGTGATAGATA
ATGCCACGAGCACGGCACATTTCGCCGATAGCCGCGATATCCTGCACCACGCCGATTTCG
TTATTTACGTGCATGATGGAAACAAGGATGGTGTCATCACGCATCGCTGCTTCCAGTTCT
TTCAGGTCGATAATGCCGTTACGCTGCGGTGCCAGGTAAGTGACTTCAAAACCTTCGCGC
TCCAGCTGACGGCAGGTATCCAGTACCGCTTTATGTTCGGTTTTACTGGTGATGATGTGC
TTGCCTTTTTTCTGATAAAAGTTGGCTGCACCTTTGATCGCCAGGTTGTCAGATTCGGTT
GCACCAGAGGTAAAGACGATTTCACGCGGATCAGCGCCGACCAGATCGGCAATCTGATTA
CGGGCGATATCTACCGCTTCTTCAGCCTGCCAGCCGAAACGGTGAGAACGGGAGGCCGGG
TTACCAAAGGTTCCGTCCATCGTCATAAACTGCATCATTTTCTCGGCAACACGCGGGTCC
ACCGGCGTGGTTGCGGAGTAGTCGAGATAAATCGGTAATTTCATTGCTCTATAAACTCCG
TACATCACTCAATGCAAGGAACCAGGCTACCGGCTGGATGTACGACCGTGTTTACGGAGT
GTTTAGCACTCCGGCCTGATTCTGAATTCTTTTTATTAAGCGCGTAACTTAACGTCGATC
GCGTCTTGTGTGCGGGTGCGTGGCGCGTCGTGAGTATGCTGACGACCAGACACATCCAGC
ACTTCCTGGTTATTAACCAGTTCGCCTAAAGTAATGTTATTGAGAAAACCGGTGAGACGG
TCGCTCAAATCACGCCACAGCGCGTGGGTCAGGCACTTATCGCCGCCCTGACAACCGCCT
TTACCCTGACAACGGGTGGCATCTACAGATTCATCAACGGCGCTAATCACTTCGCCAACG
GCGATGCTGCTGGCATCTTTGCCTAACAGATAACCACCGCCTGGTCCACGTACGCTGGAA
ACCAGACCATTTTTACGCAGACGGGAAAACAGTTGTTCCAGATAAGAAAGGGAAATTCCC
TGACGTTCGGAAATATCAGCCAACGGTACCGGGCCCGCTTCAGAGTTGAGCGCAACGTCA
AGCATTGCGGTCACGGCATAGCGCCCTTTAGATGTCAGTCTCATGTCTTACTTCACCTCA
AACTCGCCCCTGCCCGGGGTTTTTTATTGTAAAAGTGGGGGTATTGCATAGCAGGGTCAA
GTCTGACATTCCCGAGTAAATTGGTCAACTATTTACTTGACTGATTTAGTCGGGTATTTA
ACCTTCAGTGCCATTTTTTATCGTGGCGTTTGTACCTGTTGTCGGATGCGGTGTGAACAC
CTTATCCGACCTGGGATTCCGTGCACTTACAGGCCTGATAAGACGCGTTAAGCATCGCAT
CAGGCAACCACTATTATTCGGCCTTGTTACCTTTATTCTGCTGCTCAATAGAAGCCAGAA
TCCCGCGCAGGATATTCAATTCCTGGCTTTCCGGGCGTGCACGGGTAAACAGACGGCGCA
ATTTATTCATCACCTGCCCCGGATGGTTTTCACGGATAAAACCGGTTGCCAGCAGCGTTT
GCTCCAGATGACCATAAAAACGCTCCAGATCATCGACCAGCGGATACGGCGTCTCTTCAT
GCTCGACCTGCTCGCCATTTTCCTGAGTTGCCAGCCAGGCCATGCGCACTTCATAGGCAA
TAACCTGAACCGCCATCGCCAGGTTCAGCGAACTGTATTCCGGGTTAGCCGCAATCGCGA
CATGATAATGGCATTTCTGCAACTCTTCATTGGTCAAGCCGACGCGCTCGCGACCAAACA
CCAGCGCCACCGGGGTATTTGCCGCTTCAGCGACGCTTTTCAGACCGCATTCGCGCGGGT
CGAGCATCGGCCACGGCAGCGTGCGGGAGCGAGCGCTGGTGCCCACCACCAGACTACAAC
CGGCTAACGCTTCGTCGAGCGTATCGACGATGTGAGCATTACCAATCACATCGCTGGCCC
CTGCTGCCAGGGCAATCGCCTGGGAGTCAGGTTTCACTAGTGGATTAACCAGCCACAGAT
TGGTTAATCCCATTGTTTTCATGGCACGGGCAACAGAACCCATATTGCCGGTGTGTGACG
TCTCCACCAGCACAATTCGAATATTTTGCAGCATTGTCTTTCTTCATCTAAAGATTATTC
ACGCATCTTATCATAAAACGAAGACAGATGCCGATCTCGCTGCTATACTCTGCGCCGTTT
TCCCGTTCTTTAACATCCAGTGAGAGAGACCGATGCATCCGATGCTGAACATCGCCGTGC
GCGCAGCGCGCAAGGCGGGTAATTTAATTGCCAAAAACTATGAAACCCCGGACGCTGTAG
AAGCGAGCCAGAAAGGCAGTAACGATTTCGTGACCAACGTAGATAAAGCTGCCGAAGCGG
TGATTATCGACACGATTCGTAAATCTTACCCACAGCACACCATCATCACCGAAGAAAGCG
GTGAACTTGAAGGTACTGATCAGGATGTTCAATGGGTTATCGATCCACTGGATGGCACTA
CCAACTTTATCAAACGTCTGCCGCACTTCGCGGTATCTATCGCCGTTCGTATCAAAGGCC
GTACCGAAGTTGCTGTGGTATACGATCCTATGCGTAACGAACTGTTCACCGCCACTCGCG
GTCAGGGCGCACAGCTGAACGGCTACCGTCTGCGCGGCAGCACCGCTCGCGATCTCGACG
GTACTATTCTGGCGACCGGCTTCCCGTTCAAAGCAAAACAGTACGCCACTACCTACATCA
ACATCGTCGGCAAACTGTTCAACGAATGTGCAGACTTCCGTCGTACCGGTTCTGCGGCGC
TGGATCTGGCTTACGTCGCTGCGGGTCGTGTTGACGGTTTCTTTGAAATCGGTCTGCGCC
CGTGGGATTTCGCGGCAGGCGAGCTGCTGGTTCGTGAAGCAGGCGGCATCGTCAGCGACT
TCACCGGTGGTCATAACTATATGCTGACCGGTAACATCGTTGCTGGTAACCCGCGCGTTG
TTAAAGCCATGCTGGCGAACATGCGTGACGAGTTAAGCGACGCTCTGAAGCGTTAATGAC
TCAGGCGGGTGATATCACTCACCCGCCCTCGCCTTTCAGGCGCTATTCCGAAATACTTCC
TCACCGCTTTACTTTCTTTCGTCACTCTCCCACCATCTTTCCCCGATTAATGGATGATAA
AGAAGTCGCAAGGAAAGATTATGGCGCTGCCAGTGAACAAACGCGTTCTCAAAATTCTGT
TTATTCTCTTTGTTGTTGCCTTCTGCGTTTATTTAGTGCCGCGCGTCGCCATCAACTTCT
TCTATTATCCTGACGATAAAATATACGGTCCCGACCCCTGGTCGGCGGAATCCGTCGAAT
TTACGGCTAAGGACGGTACTCGTCTGCAAGGCTGGTTTATTCCTTCTTCGACGGGCCCTG
CTGACAACGCCATCGCAACCATCATTCATGCTCACGGCAATGCCGGAAATATGTCCGCCC
ACTGGCCGCTGGTCAGTTGGTTACCCGAGCGTAATTTCAACGTTTTTATGTTTGATTATC
GCGGGTTTGGTAAATCAAAAGGCACGCCGTCCCAGGCCGGATTGCTGGACGATACGCAAA
GTGCCATCAATGTGGTGCGCCATCGCAGCGATGTAAACCCACAACGGCTGGTGCTGTTCG
GGCAGAGTATTGGCGGGGCGAATATTCTGGATGTTATTGGTCAGGGTGATAGTGAAGGCA
TACGTGCGGTGATCCTCGACTCCACATTTGCCTCTTATGCGACCATTGCCAACCAGATGA
TCCCCGGCAGTGGCTACTTACTTGATGAGAGTTACAGCGGCGAAAATTACATCGCCAGCG
TCAGCCCGATCCCGCTTTTACTCATTCACGGTAAAGCTGATCACGTTATCCCATGGCAGC
ACAGTGAAAAGTTGTATAGCCTGGCAAAAGAACCAAAACGGTTGATCCTAATCCCGGATG
GCGAACACATTGATGCTTTTTCCGATCGTCACGGCGATGTTTATCGCGAACAGATGGTGG
ATTTTATCCTTAGCGCATTGAATCCGCAGAACTAACCCATGATCGCTAGCACGATAATCA
TTCACAAAACCACCTTAAGACATGCTAATCCACTGGTCAGAACAGTTTAAGATGAGAAAA
ATTCTGTGATGCTTGCCAACATTTCTGATGATTAGCATTCCCTTCGCCATTTCCCTGAGC
AAACTTTAGCTATTCTTATCAATTATGCTTATGGGAGATCTACAGATGATGCCTACGCTT
GCTCCACCATCTGTCCTTTCGGCTCCCCAGCGCCGCTGCCAGATCTTGCTGACGCTCTTT
CAGCCGGGGTTGACCGCCACCACGGCAACTTTCAGCGAGCTTAATGGTGTGGATGATGAT
ATTGCCAGTCTTGATATCAGCGAAACAGGACGGGAGATCCTGCGCTATCATCAACTCACA
CTGACTACTGGTTATGACGGCAGCTACCGGGTTGAAGGTACAGTGCTTAACCAACGCTTG
TGTTTATTTCACTGGCTACGACGTGGTTTCCGTCTGTGTCCGTCATTTATTACCAGCCGA
TTCACCCCCGCCCTGAAGAGTGAACTGAAGCGGCGCGGAATTGCGCGTAACTTTTACGAC
GATACCAATCTACAAGCGTTAGTGAATCTCTGCTCTCGACGGCTGCAAAAACGCTTTGAA
ACGCGCGATATTCATTTCCTGTGTCTGTATTTGCAATATTGTTTGTTGCAACATCACGCT
GGAATTACGCCTCAGTTTAATCCGCTCCAACGTCGCTGGGCAGAATCCTGCCTTGAATTT
CAGGTAGCGCAGGAAATTGGACGCCACTGGCAGCGTCGGGCGCTCCAGCCTGTACCGCCT
GATGAGCCACTATTTATGGCACTACTTTTTTCCATGTTGCGGGTTCCCGATCCACTGCGG
GATGCGCATCAGCGGGACAGACAACTGCGTCAGTCTATCAAACGTCTGGTAAACCACTTT
CGTGAGCTGGGAAATGTTCGTTTTTATGATGAACAGGGGTTATGCGATCAGCTTTATACC
CACCTCGCCCAGGCGTTAAATCGCAGTTTGTTTGCCATCGGTATTGATAACACCCTGCCG
GAAGAGTTCGCCCGCCTGTATCCACGCTTGGTGCGCACCACCCGCGCGGCGCTGGCTGGA
TTTGAAAGTGAATACGGCGTCCATCTTTCTGATGAGGAAAGCGGTCTGGTCGCGGTGATT
TTTGGTGCCTGGCTAATGCAGGAAAACGACCTGCATGAGAAACAGATTATTCTACTGACC
GGGAATGATAGCGAGCGAGAAGCGCAGATTGAGCAGCAGCTACGCGAACTAACGTTACTG
CCGCTCAACATTAAACATATGTCGGTAAAGGTATTTTTGCAGACAGGCGCTCCGCGCGGC
GCGGCACTGATTATTGCTCCTTATACCATGCCGTTACCGCTCTTTTCACCACCGCTGATC
TATACGGACCTGACGCTGACAACACATCAACAGGAGCAGATCCGCAAAATGCTCGAATCA
GCATGAGGGAACAACTTTCGGGCGCAAAAACATTGCCGGAAGCGCCACCAGCGCCATCAC
CCAGAACACGCCGTGGCCGAGATATTGATACAGGAAACCGGCGAAAACGGTCATGATGGC
GATACTGCCGCCCATCGCGACGGCAGAGTAAACCGCCTGTAAACGGATGACTTCGCTACC
CTGGCGAGCAGCAATATAGCGCATGGCAGCCAGGTGGCAGACCGTGAAGGTACCGCAATG
CAGAATTTGCACCACTATCAACCACGGCAACGCCGTAGTTGCTCCCATAATGCCCCAGCG
CACTACGCCGCAAATCGCCGAGATCAACAGCATATCGCGTGCACTACAACGGCGGAAAAG
TTTATTACTCAGCGCAAAGATAATGACTTCCGCCACCACGCCCAGCGACCACAAATACCC
CACCGCCGAGGCCGAGTAGCCAGCTGCCTGCCAGTAAATGGCGCTAAAACCGTAATAGGC
CGCATGTGCCCCCTGCAATAAACAAACGCAGGCCAGAAAGCGCCAGTTCTGGCGAACCAA
CGCCAACCACGCAGACCAGCCGGTGCTCTCCTGCTGGCGGCTTGCCCCTTGTGGCTGAAT
CGTCGGACGGATGAGAAAGCCGAGCAGCATGGATGCCACGCCCAACGTCAACAGCGCGAG
GATCACCCGATAATCAAACATACTGACCAGTTTGCCCGTCAGCGCCGAGCCAATGACAAA
CGCCACCGAGCCCCACAGTCTCACTTTGCCGTAATCAAGCGAGAACTGCTTTTGCCACGT
ATTCGCCAGTGCATCGGTCAACGGTACCAGCGGTGAGAAAAAGAGGTTAAAGCCAATCAT
CACCAGCATCAGCCACGCTACGTGCGCCCCCGCCCAGAAGGCGACAGCAAAGAGAAGTGT
CAGCAGTGCCAGCACGCGCAAGGCGGAAATCAGGCGGGAAGGATCGCTGACGCGGGGCGC
GATGAGCAAACTCCCGAGGAAACGGGCAACCAGACCCGCCCCCAATAACAGGCCGATGGT
TTCTGGCGTTAAACCAATCCCTTTAAGCCAGACGCTCCAGAAAGGTAGAAAAATGCCGTA
ACTAAAAAAGTATGTGAAATAGCCGAGCGCCAACCAGCGCGTGGATTGCAAAACCATGAG
TCCCTCCCGTCAGGAGGCGTTAGTCTGAGGTTAATCGAATGTTGGTGCAAGTTGAAAAAT
AAGAATATTCGAGCCTGCTTCCTGACGGTTATCCTGCATATCAGGAAATGACAAAAAAGA
GCGGCCCACAACACAACATGTAAAAAAGAACGATGAAACAGGTGAAAATCGCAATTTATT
GAACTGACAAACTCATGTGAGACGGATAAGGCGTGCATGTCGCATCCGGCAGGAAACAAT
AAGCACATTGTCAGCCATCTGCGTTATGCCGTTATACCAGAAACGAATATCTCAACGCCT
GGGCGTGGCGAGGTACCAGAGTGTGTATTACGTTTAAATCACATCATCTTGCAAAGGGAT
TGGTTATGAACTCACTACGTTATTTTGATTTTGGCACTGCCCGCCCCGTTTTATTATTAA
TTGCCCGTATCGCCGTGGTCTTAATTTTCATTATTTTTGGTTTTCCCAAAATGATGGGCT
TTGGCGGTACGGTCCAATATATGGCCTCGCTGGGCGCACCAATGCCGATGCTGGCAGCGA
TTATTGCGGTAGTTATGGAAGTGCCCGCCGCGATATTAATCGTGCTTGGCTTTTTCACCC
GTCCGCTGGCGGTGCTGTTTATTTTCTACACGCTGGGTACGGCGGTGATTGGCCACCATT
ACTGGGATATGACCGGCGATGCGGTTGGGCCAAATATTATTAATTTCTGGAAGAATGTCA
GTATCGCTGGCGCATTCCTGCTGTTGGCAATTACCGGGCCGGGGGCGATTTCTCTCGATC
GGCGTTAGGAAAGATGCCGGATGCGGCGTAAACGCCTTATCCGGCCTACCGCTCCAACAC
CGATTGTAGGCCTGATAAGACGCAGCAAGCGTCGCATCAGGCATCGTGCACCGAGTGCTA
CAAAATCGAAATTACCCCGTAGGCCTGTGCATCCGGCATTTTATAAATTACAGCAACGCA
ACCCGCAACGACATCTCTGAAATTGTTGATTCCCCTGGTGCAAGCGCAATGAGGTCACCA
CCGTCCGGACGATGATGGTCATCCGGCGCATGGCTCATCGGTTCCAGACAGAAGAAATCA
AACGCATATCCTTTATCAAACGCAGGGTCTGAAACAAAGATGAAATAACACTGTGCAGGT
GGCGTCGTTTCCATGATGATGGCATAACCCTCCTGCGGCTGCTCGATGCGGGCCTTACCA
TTCCATCCGGCAAAACCATTGTTTACCCACTGGCGCGGCAACGGCGCGAGCTGGTTAAAA
TCCAGCTCCTGCGGTAGCTGCTCGCAAAACTCACCCGCCAGCCACTGCTCCCGCTCCACC
CAGTAACCGCTCGCCTGTGCCTGAATCCGCGTTTGCGGCGACAACAGAAAATAAGGATGC
CAGCCGGTACCAAATGGCAGCGTCTCTGCCCCTTGATTGGTGACAGCGAGCGTCACCGTC
AGCGTATCCGCCGTTAAATGAAATGCCTGGCTTACCCGATAGTGATAAACACCGCTGAGA
TGTTCATACACCAGACACAAGCTATCATCGCTGCGCGAGACACATTGCCACTCGCCCAAC
CAGCCATCGCCGTGTAGATAGTGCGCATCCCACTCAACATTCGGTTGCAGTTGATACTCA
CGCCCCTGCCAGACAAAACGGTTGCCGCTCACCCGGTTTGCAAATGGTACCAGCGGAAAA
CAAGAGGCATCGGTTGCCACACCGCTTTTTTACCAGGACGTAGCAGCGGCGTCGTATCGC
GCCAGAAGCCTTCGATTACGCCGCCCTGATCAGAAACGTCCAGCTTTAGCGGCCCGTGAG
ATAGGGTATAGATGGTCATCCGCAGACTCCTTAATCCGGGAAATTAATCACAACTTTCCC
GCATTTGCCGCTTGCCATCAGTGCATAAGCATCTTCCGCCTGTTCCAGCGAGAAGCGGTG
GGTAATGGCGTTACGCGGCCACAGTTTCCAGTCCGTTAAATCGTGGGCGCATTTTTCCAT
ATGGAACAGACTGGTCACCCAGGAGCCGATAATCCGCCGTTGATGGTGCATCAGGTCGGC
GCTAACCTCGAACTCGACTTTTCCGGTTTCACCAATGTAAACCACGCGTCCCCAGTCAGC
GGTGGATTGCAGTGCCAGTAAGCGACCTGCGGCATTACCGGAACAATCAAGCGCAACATC
CGCGCCGCCGTGAGTGAGTTCGGCGATTATCTGCGGCAGACCTTCGGTGGTCGCTAAATA
GCCGTGATCCATCACTCCTAACTGTTTCGCCATCGCCAGACGTTCCGGCAGCATATCAAC
GCCGATGATCCTTTTTGCACCGCGACCTTTCGCCAGCATCATCGCCATCATCCCGACCGG
CCCCAGACCAACCACCAGCACGTTATCGCTACCGGAAACCTCGCCGCGCAAAATCCCTTC
ATACGCCGTACCAACACCGCAACTGATAAACGCGCCATCTTCGTAACTCAGCGCGTCTGG
CAGGAGGATCAGATCTTTTTCTTCCGCCAGCAGGTATTCAGCATGGCCGCCGTCACGCTG
CCAGCCGTAAGCCGCTTTTCCTTCGCCAGTACAAGAAATAGGAAAACCGCGACGGCAGTT
CGGGCAAAAACCACAGCCAGAAATGTGATACACCAGCACGCGGTCGCCCTCTTTAAAATG
GCGGCAGCCTTGCCCCATCGCCACAATCTGCCCGCACGGTTCATGACCGTTGATAAATCC
CTGGTATAACGGTTTATCGGGTGCCGCCGCCGTAGCGCGGTGCTGGTGGTAGATATAGTG
GACATCGCTTCCGCAAATCCCGGAGGATTTCATTTTGATCAGTACCTGGTTAATCCCCGG
CGTCGGCACCGCAACTTCCCGCAGATCGACGGTCGAATTTCCTGGTAAATAAGCTGCCAG
CATCGTTTTCATAAATCCCTCATTAACAATACGATTAATTTTCATCCCTGCCGCACCTGC
GCCAGGGGCGTTAAGGTTTAGCGTTTCGCTTTACTGCTACGCTGGGTCAGCAAGATATTC
GCCAGCACCGCCACCACGATGATGACGCCGCGCACCACCTGCTGGAAAAAGGAGTTAATC
CCGAGCAGCACCAGACCGTTACCGATTAGCGTAATCACCAGTACGCCAAGCAGCGTACCG
AACAACGAGCCGCGACCGCCGGAAAGCGCCGTACCGCCGACAACGACCGCGGCGATGACG
TCAAACTCCAGACCGTTTGCGGCACCTGCGTTACCGGAACCGAGGCGCGCCGCCAACAAA
ATGCCGGTCACCGCCGCTAATAATCCCGAAAGGGTAAAAATAAGAATGCGTACCCGACGA
ACGTTAATACCGCACAACTGCGCTGCAGTGGCATTACCGCCAACAGCAAAAACCGAGCGC
CCGAAGGCGGTTTTGCGGCTAATGAACACAAACAGCGCAAATAACACCATCATGATCAGC
GCGGATACCGGCACCCCGAGAAATTGTCCGCCCAGCCAGTCCAGCACTTCGTTTTCGTTA
ATTGGCACTGGCAAGGCGTTCGTCATAAACAGCCCCATTCCGCGCAGGGCGCTCCATAAA
CCCAGCGTGGCAACAAAACTTGGCACGTTAAACACGCCGCGCAGCACCCCGGCGAGCGTT
CCCATCAGCGCACCTAACAGCAACACCAGCAGACAAGCAATCGCCAGCGGAACGTCAAAT
TGCAGCAAAAACGCCAGGCACACTGAAACAAAAGCCACCATCGGCCCAACGCTGACATCA
ATTTCACCGGAGATAATAATCAGCGTCATCGCCCAGGCGGCGATCCCAATGGTGGCGGCA
TCGCGCAGCACGTTCATCTGGTTATTCAATGAGATAAAGCCAGGCGCATTCAGGGAGAAG
ACCAGATAAAGAATGGCAATCACCACCAGCAAACCGATCTCATTAATATGGCGACTGACA
AATTGTTTGAGCGAGACGCTCTTGCCCTGCGGCAATGGTAATGACGAAGCAGACATCTTC
AGGTTCCTCGGTAAAATTCATCAGTGCACAGACAGAATGGCGGACATCAGCTCATCCACA
TTGACCGGAGAGTGAAACTCCTGCGAGAACGTACCGTGCTGTAACAACAGAATGCGGTCG
CACACCAACGGTAACTCCTCCACTTCACTGGAGATAAACACCACGCTTTTTCCTTCGGCA
GCCAGCTCGCGGACAATACGGTAAATCTGCTGTTTGGCTTCGATATCGACGCCGCGCGTT
GGCTCGTCGAGCAACAAAATCTGGCTGGCGGCATAGACCCAACGACCGATCACCACTTTT
TGCTGATTGCCGCCAGAAAGCGTGCCGATGGGCGTTTCGCTACTGGCGGCCTTGACCGTC
ATCCGCTGCATCACCTCTTCGGTCAGGCGGCGGATGGTGGACCATTGCAGCACACCGTTG
GCGCTGATTTTTTGCCGATTGGTCAGCACTGTATTTTCGTCAACGCCCAACCAGGGAATG
ATCCCCGCTTCTTTGCGGTTTTCTGGCGTATAGCCAATGCCGCGTTTCAGCATGTCGCCG
TAATCGGGGCGCGTGATTTTCTCGCCGTTGATAACAATTTCGCCCTGTTCATACGTCTCC
AGCCCAACAATCGCCTTCAGCAATTCACTGCGCCCTGCCCCCAGCAGACCAGCAATGCCG
AGCACTTCGCCACGACGTAGTGTAAAACTGATATCCTCCAGCTTGGGCTTATGGCGTAAC
GCACGGACTTCCAGCACGGCCTGATCCATAATTTCCTGAGGGGCAACCGGCGCAATATCA
ACGTGATCGCGCCCGAGCATTAGCGACACAATATGATGCGTAGAGGTGTTTTCGAGCATC
ACATCGCCCGCCACCTGACCATCGCGCATAACGGTGGCACAGGAGGCAATGCGGCGAATT
TCTTCCATCCGGTGGCTGACATAAATCACCGCCACGCCCAGTGCCGACATCTTTTTCACC
GCGCTGATCACCAGTTCAACTTCCGCACTGGCAAGCGAGCTGGTGGGTTCATCAAGAATG
ACCACGCGCGGCTCGCCCTTCATCACCCGCGCAATTTCCACCAGTTGCTTTTGCGCCGGG
CTTAGTGTTGAAACAAGTTGTTCAGGACTAACGTCAACGCCCAACGCCTGCAAGCAACGT
TGGGCGTCCTGCGCCATTTGCAGGTAATCAATCATGCCGTTGCGGCGGGGCCACTGACCG
AGGCAGAGGTTTTCCGCCACTGTCAGCCCTTCCACCAGACTTAACTCCTGATAAACCGCA
CGAACCCCCAGTTCAGCGGCACGGCGAGTCAGCGTAGCTTCGTCACCTTCCAGTCGCGTC
TCGCCAATCCAGATATCACCGCTATCCGGACGTTCGCTACCGGTCAGCATTCGAATGAGG
GTCGATTTTCCCGCACCGTTTTTGCCTAACAGCGCGCGAACTTCGCCTTTATTGAGCGTG
AAGTTAACGTTATCCAGCGCAACGACGCCGGGGTAACGCTTATTTCCTGCCACCACTTTT
GCTACCGGGACTGCCTCTGTTGCCGTGAACATAGGGACCTCTGCGAATCAGCGATTAGGG
CAGACCATCAACGTGCGTTGCCAGCCACTGTTTACCGTCTTCCGTTTTGGTATAGAGATC
GATTGGCACCTGAATCACTTTTTCACCGTCGGCTTGTTTATTGATAACCTTCAATGTTTG
CGCGAAAACAGCATTGCCCATTTTCTTACCGGAAATATCCACCACCGCTTTCAGCACCTG
GTTGTTTTCCAGCTCCTGAGCAATTTCAGTGGTCATATCAGAACCGAAAACAGCAATTTT
TCCGGCCTGATTTTGATTACGTACCGCTTTTACCGCGCCGAGTGTCGCTCCGCCCGATTC
CCCCATAATGGCGTTGAGATCCGGCGTGGAGATAATCAGTTTTTCACCGACAGAAATCGC
TTTATCTAAAACAGTCCCTTCCTGATTAGCGACAATTTGCGCGCCGGGAACGCGGGTTTT
TAATACTTCTTCAAACCCTTTACGACGTTGCACACAAACTTCAAAGGCTTCGCAATTGAT
GACGGCAATTTTCGGCTGGTCAATTTTGTTGGCAATAAAATAATCGGCGGCTGCGTTACC
CAGTTTTTTACCAAATTCCAGCGGGTCACCAACCAGATATGCCGAGACATATTTATCGAC
ACCCTTTTGATTAATACAGGTGTTGTAGCAAATCACCGGAATACCCGCTTCACTGGCGCG
ACGAACGGTACGGCTACTGCCATTTTCAGACACTGCCGATAAAATAATGGCATCGACATT
ACGCGCCACGAGGGTATCAACAAAGGTACTTTCTTTCGAAATATCGCCCTGAGCGTTAGT
TTCAATTAACTGTACCTGTACTGAAGAATCTTTTGCCGCATCCTGAACACCCTGACGCAC
TCCGGCGTAATATCCCTGGGTATCAAGGTATATTGCGCCAATAGTCATTTCTTTATCAGA
AGCCCTGGCAAATAGTGCGCTACCCAATAGCGTAGCCATTAATAATAAATTACGGGTTCT
TGTCATTTTTTTAGGCATAGTGCCTCCTGTAGGGTTTTTATTTACAACGGCTTATTTTAA
TTATTTGAGCGTGAGCGGCAGCGCGTGCCGCTCAAATATTACAGTTAATAGGGTTTAGTG
AACGTAGCTAAAAATAAAAGGCATCACGGTGGTGAATAATGCCGCTTTCGGCCAGGCTGG
ATTAATCGCCATCAATTCAGCGCGAGCAGATTCATAGTGCGCAACCTCCCCTAATCCCGC
GGCCGCCAGCATCGCCACCATCAGGCATTTTTCTTTATGCTGCTGTTGTAAATCGCCATA
CAGCGACAACAAGTCAGGCTGCGAGACGGCAAAGAAATCCGCTTCGATACTGGTTTTCGC
CATCTCTTGTGCCCACTGTTTCATTTCACTAAACAGTTGCTGTGCGGTGTGTTGTTCGCC
CAGCAGTCGCAGCGCCATTCCTTGCCAGAAGAGATAATCAACCGGCTGATCGTTGTAATA
ACTGTGGATGTTAATGGTGCGATCGCCGGTCGCCGCCAGACGTAAACAACGCGTCGCTTC
AGTTTCATCGCCCTGCACGTTGGCGCATACTGCCTGCCAGAACCAGATGTCGTTGTCAGT
TTGCCCCGGTAAACGGCCTTCGCTTAAATTCTCCGGATAATGCAGCGCGGCATGAAGCAG
TTCGCTGGCCTGCTGCGGCTGTCTGGCATCAAGATGCTGCCAGGCGCGTAATAACTGGTT
GAGGATAAACTGGCTGGTGACCTTCCCTTCCCCACCTTCCCACGGGTGGAATTTGCGCGT
GGCGAGAATGTCCGCCGCTTTGTCTGCCTGACCAGTGAGATGCCACAAATTGAGCAGTTC
TGCGGTCATGTCGTCGCGTTTCAGCGCAATTTCCAGATTATTTTCCAGACGCGCCAGTCG
TTTCTCCGGTGTGACACCGCTTAACTTATCCAGCAAATCCCGTTCGAAAAGCAGACGAGC
ATCCTGCGGCGCAAGCTGATAAGCATTATCAAGATAACGCGCGGCCAGCTCATAATCGTG
CTGCTTATTCCACGCATGGATCGCCAACCCGCGCCAGCCGTCGGCAAACTCCGGCGACAT
CTCTACGCAACGCTGCCATAAGGCAATGGCTTTGCCGTAGCTACGCTTGTTGTAGTAGAA
GCAGGCCAGTAAATGCCGGGCAAACCAGCACTCTTCGATACTCTCCAGCGCCGCCACTTC
TTCCAGCGTATTCGGGAAACGGACAAACTGCGGGAAGGCATCAATAGCTTTTACGACCAG
TTCTCCGCGTTCAGCTTTTGGTAGCAAACTGGCTTGCAGGTAAAGCGGTAGCGTGCGCTG
ACAGTCCAGTGCGTTCAGCATATCTGCCGCCAGGGCGGGCATGCCCCAGTTAATCAGTTG
CCCGGCGGTCATCAGGGCGTTAACGTCGCGTCCCTGACAAAGACCTCGCCACTGCGCGAG
GGCTGATTCGCTACGACCATCGAACCAGTTCAGCCACCACAGAGTGGCGTTCAGCGGATA
ATCACGCAGCAGTTTCTCGCGCTGCAAACGCGCGTTGTCCTGACGACCACTTAACACCAG
TAGCAGGTTATGCAGGCAAAGCACTTCCTGATTGGTTGGGCAGGCGCGAAGACTTTGTTG
GCAAAAATCCAGACCAGTGTCGAAGTTACCATTACGCGCCGCCAGTCGTGCCAGACCATA
ATAGCCACCGGCTTTACTGTTGCCGCTCCAGACCGCACGCCAGAAATCCTCTTCGGCTTG
TTGATATTGCCCCTGACGTTCGTAAGCACTGGCGCGAATCAAACTCGCCTGTCCGCACTG
CGGATTTTTGTTCAGCGCATGTGCGCGTTTCAGTGCCTGACTGGCATATACCACCGCTTG
CGGGAAATCTGCACGGTTATATTCCAGCATTGCCAGCGCCAGATTACAGCGATAATCCAG
CGGATCCAGCGCCACGCCGCGCAGGTAGTAATCGAACGGTGAACGGCTCGCGTGATGATA
TTGCTCCAGATGTTGACCGATAAACCAGGTTTCATCTGTACTGGTAATGTCTTGTGCTGC
CAGTGGCGCTTTGGCGACGTCCGGCAACGGCAACTCTTGCGGCTGATGTTCCTGATAACT
CAGTATGATATTGCCGTCGGCATCGGAGAGCTCAATGGTCAGCCTTTCAGGATTGATACC
GTGCAACACGCCCTGGATGGCGGTCGCTGGTGTCAGGGCCACGGCATCATCGAGCAACGC
GTTGCATTTGCCGATTTCGCGGATCGCCAGGCGGTATCCGTTCAACGGAGAGATGGCATA
CAGCCCCCACTCAATCCCCCGCTCACTACGCTGGAGTTTTATCACCGCATCGCGGGAGGC
ATTTTGCACCATGCCCAGAGAATGATAAGGCAGGAAATACTGCTCGAAACGCTTCTCCTC
GTAAGCATCAAGCCAGGTAAAATCAGGCTGGTTATCGGCAAAAATACCGGTCATCAGTTC
GATATACGGGCCGTTATTGTCAGTCAGGCTCTTATCCCACGCCTGGCCAAATTCACTGTG
TCCCCAGCTCCACTGTTTTTTACCTGGCGCAATATGGTGGTTGGCAACGTGTAGCAAACC
ACCATCTTCATCGTGACACCACGCGCCAACAAAATCGTACTGTGATTTTTCAGCCATATA
TGAGGTTGGAACGGGCACATTTTTATAGCGAGAAATGTCCACTCCGGCGGAGTAGTCCAC
TTTGTAGTAAGTGCCGGTGGCGATGGGGAAAGCGGAGACGGCCCGTTTGCCGTGATCAAA
CACCGCCGTTACATCCGGCGGGAAGACGCTCTGATGCCCTTCCCCCCTTTCACTGCCGGG
TTGGCCCACCACAAGAAATGACGCGGCGTGGCGTTGCCGTTATAGACTCGGCTGGCGATT
TCCAGCGCCGCCCGGTCAGGGCGCAGGGTGAAACCTGTCATCACCTGTAAACCGTGCATC
GGCTCCGTTTCGCCGACCCACACCGTCTGTGCGCCGTCGTCATGGGCTTCGAGGGTGAAA
TCAACGGGCATAAAGGTAGTCGGGCGATGGTGTTGCGGCCAGTTAAACTCAATCCCGCCG
GAGATCCACGGCCCCAGCAGTCCCACCAGCGCCGGTTTAATGACTTCATTGTGATAAACA
AAATCGCGCTGTTTCACTTTATCCCACGCGCGATGCACCCGACCGCCCAGTTCCGGCAGG
ATCATCACTTTGATGTAGTCGTTTTCCAGCCACACCGCCTGCCAGGATTTCAGGGTTTTC
TGCTCGCTCAGCGTATCGGTCACGCCGTAGGGATAAACCGCGCCGGACGATCCCTGATAA
ACGCGATTTTCCAGGAACATGGGATGTATATCCTGCGGCCCGGTTTCATAGGTCGGGATC
TCAACGCGCTCTTGCCACACTTTTACTGGAGTCATGGTGCCCTCAATATTAACAAGACAT
ACTGAATTAAAAGATTTGTGGCAGTGTATTGAACAATCTGGCAATGTTTTCGCGGAATAA
TCACGCAATTAACTAAACAAGGTTTAGTGAAGATGAGAGCCTGCATTAACAATCAACAGA
TTCGCCACCATAACAAATGCGTGATTCTGGAACTGCTGTACCGGCAAAAGCGCGCCAATA
AATCAACGCTGGCCCGGCTGGCGCAAATTTCGATTCCGGCGGTCAGTAATATTTTGCAGG
AACTGGAAAGCGAAAAACGGGTGGTGAATATCGACGATGAAAGCCAGACGCGCGGGCATA
GTAGCGGTACATGGCTGATTGCGCCGGAAGGAGACTGGACGCTGTGCCTGAACGTGACGC
CCACCAGCATTGAGTGTCAGGTCGCTAATGCCTGTTTAAGTCCGAAAGGCGAATTTGAAC
GCTTTCAGATTGACGCTCCAACGCCGCAGGCGCTGCTGTCCGAAATCGAAAAATGCTGGC
ATCGCCACCGTAAATTGTGGCCGGACCGCACCATCAATCTGGCTCTGGCAATCCACGGTC
AGGTTGATCCAGTGACCGGCGTGTCGCAAACCATGCCGCAAGCGCCGTGGGCAACACCGA
TTGAGGTGAAGTACCTGCTGGAAGAGAAGCTGGATATTCGGGTAATAGTCGATAATGACT
GCGTGATGCTGGCGCTGGCGGAGAAATGGCAAAATAATTCGCAAGTGCGTGATTTCTGCG
TAATCAACGTTGATTACGGCATTGGCTCGTCGTTCGTGATTAACGAACAAATTTATCGCG
GCAGTTTGTATGGCAGTGGACAGATTGGCCACACCATCGTTAATCCGGATGGCGTCGTCT
GCGACTGCGGGCGTTATGGCTGCCTGGAAACCGTCGCCTCGTTAAGCGCATTAAAAAAAC
AGGCGCGGGTATGGCTAAAATCACAACCGGTTAATACTCAGCTTGATCCTGAAAAATTGA
CTACCGCGCAGTTAATCGCTGCCTGGCAGAGTGGAGAACCGTGGATCACCAGTTGGGTTG
ACCACAGTGCCAACGCCATTGGTTTGAGTCTGTATAACTTCCTCAACATCCTCAATATTA
ATCAGATTTGGTTGTACGGTCGCAGTTGTGCCTTTGGTGAGAACTGGCTTAATACCATTA
TTCGCCAGACGGGATTTAACCCGTTCGACCGCGACGAAGGACCGAGCGTGAAAGCGACAC
AGATTGGCTTTGGGCAATTAAGCCGCGCACAACAGGTACTGGGAATTGGCTATTTGTATG
TTGAGGCGCAGTTACGGCAGATTTGATGGCGCGATAACGTAGAAAGGCTTCCCGAAGGAA
GCCTTTTTTCAACAGATTAACCGTTTCGCTTATGCGTAAACCGGGTAACGTGCGCAGATG
TCGAGAACTTTACCTTTGATGCGCTCGATAACGGCTTCATCATTGATGCTATCCAGCACG
TCACACATCCAGCCAGCCAGTTCTTTCGCTTCGGCTTCTTTAAAGCCACGACGGGTAATC
GCCGGAGTACCTACACGAATACCGGAAGTCACAAATGGGCTCTTCGGATCGTTCGGTACG
CTGTTTTTGTTGACGGTGATGTTAGCACGGCCCAGAGCGGCGTCTGCTTCTTTACCGGTC
AGGTTTTTATCAACCAGATCAACCAGGAACAGGTGGTTATCAGTACCACCAGAAACCACT
TTGTAGCCGCGTTCGAGGAACACTTCTACCATCGCTTTGGCGTTTTTCGCGACCTGCTGC
TGGTAAGTTTTGAACTCAGGTTCCATTGCTTCTTTCAGAGCAACCGCTTTACCGGCGATT
ACGTGCATCAACGGACCGCCCTGACCACCAGGGAAAACGGCAGAGTTCAGTTTTTTGTAC
AGCTCTTCGCTACCACCTTTCGCCAGGATCAGGCCGCCGCGCGGACCCGCCAGGGTTTTG
TGAGTGGTGGTAGTTACTACGTGAGCATGAGGAACCGGGTTAGGGTAGACGCCAGCGGCA
ACCAGGCCCGCAACGTGCGCCATATCAACGAACAGGTAAGCACCGATGCTGTCAGCGATT
TCACGCATTTTCGCCCAGTCCACCACGCCGGAATATGCAGAGAAGCCACCGATAATCATT
TTCGGTTTGTGTTCTTTGGCTTGTTTTTCCAGATCGGCGTAGTCGATATGACCGGTAGCA
TCGATACCGTAAGGAACGATGTTGTACAGTTTACCGGAGAAGTTAACCGGAGAACCGTGA
GTCAGGTGACCGCCATGCGCCAGATTCATACCCAGAACGGTATCGCCTGGTTCCAGCAAC
GCGGTGTAGACCGCAAAGTTAGCCTGGGAGCCGGAGTGCGGCTGGACGTTAGCGTAGTCA
GCGCCGAACAGTTCTTTCGCACGATCGATCGCCAGTTGTTCAACGATATCAACATACTCG
CAACCGCCGTAGTAGCGTTTGCCCGGATAACCTTCAGCATATTTGTTGGTCAGCTGAGAA
CCCTGCGCCTGCATTACGCGCGGGCTGGTGTAGTTTTCGGAGGCGATCAGTTCGATGTGC
TCTTCCTGACGTACTTTTTCCTGCTCCATAGCCTGCCACAGTTCGGCATCATAATCGGCA
ATGTTCATTTCACGCTTTAACATCCGCATCTCCTGACTCAGCTAACAATAAAATTTTTGG
CCTTTATAGGCGGTCCTGTTGGACAACGGCGAACAGTATAACCGAATCATTGTGCGATAA
CAGGTCTTGACAAAGGAATTTACGCAAACGATTACCTTCAGGCTACGCAAGGCTTTGGAG
AATAAAGAGCTTGCAACCGGAAACGGATTTCTTTTCAGGTTTGTGATGCAAATTTTTCAC
TTCATCACATTCTTTCTGAAAAACACCAAAGAACCATTTACATTGCAGGGCTATTTTTTA
TAAGATGCATTTGAGATACATCAATTAAGATGCAAAAAAAGGAAGACCATATGCTTGACG
CTCAAACCATCGCTACAGTAAAAGCCACCATCCCTTTACTGGTGGAAACGGGCCCAAAGT
TAACCGCCCATTTCTACGACCGTATGTTTACTCATAACCCAGAACTCAAAGAAATTTTTA
ACATGAGTAACCAGCGTAATGGCGATCAACGTGAAGCCCTGTTTAACGCTATTGCCGCCT
ACGCCAGCAATATTGAAAACCTGCCTGCGCTGCTGCCAGCGGTAGAAAAAATCGCGCAGA
AGCACACCAGTTTCCAGATCAAACCGGAACAGTACAACATCGTCGGTGAACACCTGTTGG
CAACGCTGGACGAAATGTTCAGCCCGGGACAGGAAGTGCTGGACGCGTGGGGTAAAGCCT
ATGGCGTACTGGCTAATGTATTTATCAATCGCGAGGCGGAAATCTATAACGAAAACGCCA
GCAAAGCCGGTGGTTGGGAAGGAACTCGCGATTTCCGCATTGTGGCTAAAACACCACGCA
GCGCACTTATCACCAGCTTCGAACTGGAGCCGGTCGACGGTGGCGCAGTGGCAGAATACC
ATCCGGGGCAATATCTCGGCGTCTGGCTGAAGCCGGAAGGTTTCCCGCATCAGGAAATTC
GTCAGTACTCTTTGACTCGCAAACCGGATGGCAAAGGCTATCGTATTGCGGTGAAACGCG
AAGAGGGTGGGCAGGTATCCAACTGGCTGCACAATCACGCCAATGTTGGCGATGTCGTGA
AACTGGTCGCTCCGGCAGGTGATTTCTTTATGGCTGTCGCAGATGACACACCAGTGACGT
TAATCTCTGCCGGTGTCGGTCAAACGCCAATGCTGGCAATGCTCGACACGCTGGCAAAAG
CAGGCCACACAGCACAAGTGAACTGGTTCCATGCGGCAGAAAATGGCGATGTTCACGCCT
TTGCTGATGAAGTTAAGGAACTGGGGCTGTCACTGCCGCGCTTTACCGCGCACACCTGGT
ATCGTCAGCCGAATGAAGCCGATCGCGCTAAAGGTCAGTTTGATAGCGAAGGTCTGATGG
ATTTGAGCAAACTGGAAGGTGCGTTCAGCGATCCGACAATGCAGTTCTATCTCTGCGGCC
CGGTTGGCTTCATGCAGTTTGCCGCGAAACAGTTAGTGGATCTGGGCGTGAAGCAGGAAA
ACATTCATTACGAATGCTTTGGCCCGCATAAGGTGCTGTGATTTGATGTTGCCGGATGGA
AACATCCGGCAACCCTTGACGCGTTTTAAATTGCCGCGTCGTCCTCTTCACCGGTACGGA
TGCGAATGACCCGTGCCACGTCGAAGACGAAGATTTTACCGTCACCGATTTTGCCAGTTT
GCGCCGTGCGAATAATGGTATCGACACAGGTATCGACAATGTCGTCCGGTACGACAATCT
CAATTTTCACTTTCGGCAGAAAATCCACCATATACTCCGCACCGCGGTACAGCTCGGTAT
GGCCTTTCTGGCGGCCAAAACCTTTCACCTCAGTGACCGTCATGCCGGTAATACCGACTT
CAGCCAGTGCTTCGCGGACATCGTCCAGCTTGAAGGGTTTAATTATCGCATCAATCTTTT
TCATGCTATTCCTTGAAAAGGTCGCCTGTCTTTTGATCTGCTAAACGTAACACATAACGC
CAATTCATTCCTTGAAATCGTTTGCATCCAGTTCGTGTCGGGAAAGCAGTTTATAAAATT
CTGTCCGGTTGCGCCCCGCCATTCTCGCCGCGTGGGTGACGTTGCCTTTGGTGATTTGCA
GCAGCTTACGCAAATAGTTGAGTTCAAACTGATTACGTGCCTCTACAAAAGTTGGCAGCG
CCGTATTTTCCCCCTCCAGCGCCTGCTCTACTAATGCATCGCTAATCACCGGAGATGATG
TCAGCGCCACGCACTGTTCAATCACGTTGACCAACTGGCGCACATTACCCGGCCAGCTCG
CGGTCATCAGGCGTTTCATCGCATCGGTGGAGAACGCGCGGACAAACGGTTTATGTCGCT
CTGCCGCCTGGCGCAACAGGTGATTTGCCAGTAGCGGAATGTCTTCTGTGCGCTCCGCCA
GTGCCGGAATTTTCAGGCTGACAACATTGAGGCGGTAATAAAGATCTTCACGGAATTCCC
CACGCGCCATCGCTTTTGGCAGGTCGCGGTGAGTGGCGGAAATAATCCGCACGTCAATAT
CAATATCGCGGTTACTGCCCAGCGGGCGCACTTTACGCTCCTGCAACACGCGCAGCAGTT
TGACCTGCAACGGTGCGGGCATATCGCCAATCTCATCGAGAAATAGCGTACCGCCTTCCG
CCGCCTGGAATAAACCTTCGCGATTGCTGACAGCGCCAGTAAACGCGCCACGCGCATGAC
CAAATAGCTCCGACTCCAGCAATTGCTCGGGTAATGCGCCACAGTTAATAGCAATAAATG
GCTTGCTGTTGCGCGGGCTGGCGTTGTGGATAGCCTGGGCGAAAATCTCTTTCCCGGTGC
CGCTCTGGCCGTTAATCAAAACGCTAACGTCTGATTGTGCCACCAGCCGCGCCTGTTCCA
GCAAGCGCAGCATCAGCGGGCTGCGGGTGACAATCGCCTCGCGCCAACGTTCGTCGGTGG
CTGGCGCGGATTGTTCCAGCGCATCGTCAATTGCCTGATATAGCGCATCTTTATCGACAG
GCTTGGTGAGAAAACTGAACACGCCCTGCTGTGTTGCAGCAACGGCATCAGGAATAGAAC
CATGCGCGGTAAGAATAATTACTGGCATTCCCGGCTGCACTTTCTGGATTTCAGCAAACA
GCTGCATACCGTCCATTTCATCCATCCGCAGGTCGCTGATGACTAAATCTACTTTTTCGC
GATTCAGTACCCGCAATCCTTCAGCACCACTTTCCGCCGTGACCACACTGTAGCCTTCGC
TGGTCAGGCGCAGGCCAAGCAGTTTCAGCAATCCCGGATCGTCATCGACCAGTAATAAAT
GCGCAGGTTTATGGCTCATCAGGAGTGACCTCATCGGTGGATGGCGCGGGCTTTTCACTC
TCGTGCGGCGTATCCGGCGAGAAATTTCCAGCCGGTTTGCGGGTCGAGAGCTGGCGTTCA
ATATCGGTCAGGTTTTCCAGCTTGCGGGTAGTGAGTTCCAGTTGCTGTTGTAGAACGTGA
TGTTGCTGGCGCAAAGTATCCAGCTCGCTGTCGCTGGACTGCTGGAGTTTGCTGTAGCGT
TGGCGCTCTTCCACCAGTTGCAGTTGCAGCGCCTGACCGTCGCGCCAAAGTTGATACAGT
GGGCGAACCTGTGCCGGGATCTTGGTACTTAGCGCATCAATGCGCGCGACCAGCTGGCGG
CGCTCATACGGCGTAATTTTGGCGTCGGCGAGCAAAATCCCTTGTTTAAAGGTATTTTGC
CAGTTGCCGTCGTCATATTGGCGGGCTTGCTGACGCGACTGCGCAGGCATTAAACGATCA
GCACAATCCATCGCCCGCAGCCAGTAAAGCGGATTGGTTTCGGTTGATTTACCTTGCAGC
GCCCAGATGTCGCTACATTCAGTAGAAAGATAGTCAGCCAGTTGATAAACCGGAATTTTT
TCTTCTGCTGGCGTATCAATGGCTGGCTTATTGTGACTCTGCACGCAACCCAGCAATGCC
AGACATGGCAGCCCTGCCAGCCACAGCCGTCGGGGCAATAATCGTTGAAAAATGTGTCGC
ATATTCACCAGACTTAAAGCCTATCCCAGTGGGCGTAATTGTTGCAGGCAGTTTGGACAT
GGACAGCGCGGAGAAACCGGAGCGTACATGTCGTACGTGAAGATTTCGAGCACTGCCCGG
GGCCAAACTGGCAAATAAAATAGCCTGATGGGATAGGCTGTTAGCATTATTTCGTGTTTT
TCGACGACGGTAATTCAATGCGGAAACAAACATCTTGCCCGCTCTCGTCGACCAGATACA
GTTCCCCTTGCATACGGCGAATACAATCCCTGGCAATGCTTAATCCCAGACCGCTGCCCT
TCACCGCCCCTTTTCGCTGGTGGCTTCCCTGAAAAAAGGGTTCGAAGATCATGGCGCGTT
CCTCTTGCGGAATGGGCGTGCCTGTATTGATGACATCAATATAAACCCGCGCACCATGTA
AACTGCTGCGAAGGCAAATGTTACCGGATTCAGCCCCGTAGTGCACCGCATTGGAGTAAA
GATTATCCAGTACGCTCATCAGCAGCATTGGCTCCGCCAGGCAAGCTGTTGCTTTGAGAT
CAACGTCGGTATGCATCATTTTAGCCCGTGCGGGCAGGCTATGAGCAGAAACCACTGTCT
CCACCAGCGGTGCTAACTCAACATTCTCCAGTTCCACCGCACTGTCCGCCTGTTTACGGT
TGTAATCAAGCAGTTGTTCGATCAGCTTTTGCAAATTGCGGCTGCTGCTATCAAGAATGC
TCACCACCTCTTTTTGCTCTGGCGTAAGCGGCCCGACAACCTGATCAGCCAGTAATTCAG
TGCCCTCGCGCATACTCGCCAGTGGCGTTTTTAATTCATGAGATAAATGTCTTAAAAATT
GATGGCGTTGGGATTCCAGCCATGACAGGCGCTCACTTAACCAAAGAATACGTTGCCCAA
CCGAGCGTAACTCGCTCGGTCCACTGAACGAGACGCTATTGCCCAGAGAACGCCCTTCCC
CCAGCCGGTTGATCATGCGCTCGATATTTTTCACCGGACCGATAATCATCCTCGTGAAAA
GCAGTACCATCACCAGACTCACCAGAAATAGCACCAGCGATTGCCAACCAAAATATTGCC
CACGTTCGGCGATTTCACGCTGAAGTTGCTGCCCACGAGAGAACACTACTGTGCGCGTGG
CCTGCACCATTTCGGTATTGGCACTGGCAAAGGCTTCCAGACGCGCGGCGGCAGCAGCAT
CGGGACCGCTGTTGTTACACTGAAGTTGAGCCAGATTGTTCAAATCCTGACGTAATGCCT
GGTAGAGTTTATCGTCCGGCAGCACGCCTGCGTGGGCATCGAGCATTTCGCTGTAACGCT
TGCGCTGGCTTTGATAAACCTTCGCAAGCGTAGGGTCGTCCAGCACGCAGTACTGACGAT
AGCTGCGCTCCATCTCCAGTGCCGCGTTGGTCATCGCTTCACTGCGCCGGGCATCAATAA
GCGTAGTGCGGTTAACCAGCGCCGCCTGATCGCTAAGTGCATTCAGGCTTTGCCAGGCTT
GCCATGCCAGCACCAACAGGGGCAGCAGAATCAGCAAAAATGCCAGCATTACCAGTTGTC
GTAATGAGCGGGGAAAAACGGGCCAGCGTTTCAAGGCGTTACTCTCGTCAGACGCGAATA
GCCTGATGCTAACCGAGGGGAAGTTCAGATACAACAAAGCCGGGAATTACCCGGCTTTGT
TACGGAATAAGGCGGTGCCTAACTCGACGTTTCGCCCGATGGTTGATATAGCTACGCTGA
TATCAGAAGTTGGACGGCAGGCACCTTGTTGTGCGTCATTCGAATTTTATGTAGCACGTC
CCGAAGGGGCTGACATAAGTCGGTGAATGAGCCACTGCTTACTATTATGCAGTAACTGTG
CCAATAAAGAAAATAGTTTGGTAACATACTGATTATACGCTGCTTTGAGGGGTTTATGGC
TTCTCCGCTATTTGAATGTAAATCAGCCACTGTGTCGCTAAAAAGAGACAACTTAAGATA
AACTTATTAGATAATATTAAAATCAATGAGTTAAGTGTCACCAAAAAGCGACACGGCAAA
CCACCCATTGTCGTGATTTAAAGACACAAAAAAGCTCCCGAAGTTGGGAGCTCATAATAG
CGGTTGGTGCTTAATGCCGGATGCGGCGTGAATGCCTCATCCGGGCTGCAATACCAATGG
GTTGACGACTTACCCCAACTGCTTACGTGCATTGCGGAAAATGCGCATCCATGGGCCATC
CTCGCCCCAGTTTTCCGGATGCCAGGAGTTGCTGACAGTACGGAAAACACGTTCCGGGTG
CGGCATCATAATGGTGACTCGACCACTTTCAGTCGTGACTGCCGTAATACCGTTCGGTGA
ACCGTTCGGGTTAGCCGGGTAGGTTTCAGTGACTTTGCCGAAGTTATCGACATAGCGCAG
TGCCACCAGCCCTTTGCTTTCCAGTGCCGCCAGATGCGCCGCATCGCGCACTTCAACGCG
CCCTTCACCGTGAGAGACAGCAATCGGCATCTGCGAGCCCACCATCCCCTGCAACAGCAG
CGACGGGCTTTGGGTTACTTCTACCAGACTGAAACGCGCTTCAAAGCGATCGGAGGTGTT
ACGCACAAAACGTGGCCACAACTCGCTACCTGGGATCAGTTCACGCAGATTAGACATCAT
CTGGCAACCGTTACATACCCCCAGCGCCAGCGTTTGCGGACGATGGAAGAAGGTTGCAAA
CTCATCGCGTACACGGTCATTGAACAGGATAGACTTCGCCCAACCTTCACCAGCGCCCAG
CACATCACCGTAGGAAAAACCACCGCACGCGACCAGGGCGTGGAAACCCTCCAGGCCCGT
GCGTCCAGCCAGCAGATCGCTCATATGCACGTCGATAGCATCGAAGCCTGCACGGTGGAA
AGCTGCCGCCATTTCAACATGCGAGTTCACGCCCTGCTCACGCAGCACGGCAACTTTCGG
GCGCGCGCCAGTGGCAATAAACGGTGCTGCCACATCTTCGTTGATATCGAACGACAGTTT
TACATTCAGGCCCGGATCGGCGTCGTTTGATTTCGCCTGGTGCTCCTGGTCAGCACACTC
CGGGTTGTCACGCAGGCGCTGCATCTGCCAGGTAGTTTCTGCCCACCAGACACGCAACGT
GGTGCGGCTTTCGCTAAATACAGTCTGCCCGTTGGCGGTAATCACAAAACGGTCACCGGA
AACCGCCTGCCCAACATAATGGACGCAATCAGCAAGCCCATGCTGTGCCAGTACCGCTTC
AACGGCTTCACGGTCAGCGGCTCGCACCTGAATCACCGCACCCAGTTCTTCGCTAAACAA
TGCAGCCAGGCGATCGTCACCCAGAGTGGCGATATCCGCGTCAATGCCACAATGACCAGC
AAAGGCCATTTCCGCCAGCGTTACCAGCAGGCCGCCATCAGAGCGGTCGTGATACGCCAG
CAGCTTACGCTGTGCAACCAGCGCCTGAATCGCGTCATAGAAGCCTTTCAGTTGGGCAAC
ATCGCGTACATCTGCCGGTTTGTCGCCAAGCTGACGATAAACCTGCGCCAGTGCCGTTGC
GCCCAGCGCGTTATTGCCTTTGCCCAAATCAATCAGCAACAGTGCGTTATCTTCGGTAGA
AAGCTGCGGCGTAATGGTGTGACGTACATCTTCCACGCGGGCAAATGCGGAAATCACCAG
CGACAACGGCGACGTCATTTCGCGCTCTTCGTTACCTTCCTGCCAGCGGGTTTTCATCGA
CATAGAGTCTTTACCCACCGGTATCGTCAGGCCCAGCGCCGGACAAAGTTCTTCGCCCAC
AGCTTTAACGGCTTCATACAGGCCCGCATCTTCACCAGGGTGGCCTGCCGCCGCCATCCA
GTTGGCGGAAAGTTTAATGCGTTTGATATCGCCAATTTGTGTTGCGGCGATGTTGGTTAG
CGCTTCACCGACTGCCAGACGGGCAGAAGCGGCGAAATCCAGCAGCGCAACTGGCGCACG
TTCGCCAATTGCCATCGCTTCGCCATAGTAGCTGTCGAGGCTGGCGGTAGTGACCGCGCA
GTTAGCGACCGGCACCTGCCACGGCCCCACCATCTGATCGCGCGCCACCATGCCGGTTAC
GCTGCGGTCACCGATGGTCACCAGGAAAGTTTTCTCCGCCACGGTCGGCAGATGCAGCAC
GCGTTTCACCGCGTCAGCGATGGTGATCCCTTCACGGGCCAGCGCGTCGCCTTTCGCTTT
CAGCGTTTGTACATCGCGGGTCATCTTCGGCGTTTTGCCAAGCAGTACGTCCAGCGGTAG
ATCAATCGGCTGATTATCAAAATGACGATCGTGCAAAGAAAGATGCAGTTCTTCGGTCGC
TTCACCAATCACCGCGTAGGGTGCGCGCTCACGCTTACACAGTTCGTCAAACAGCGGTAA
CTGATCGGCAGCAACCGCCAGCACGTAGCGTTCCTGGGATTCGTTACACCAGATTTCCAG
CGGGCTCATGCCCGGTTCGTCGCTCAGGATATCGCGCAGTTCAAATTTACCGCCGCGCCC
GCCGTCGCTCACCAGTTCCGGCATGGCGTTAGAAAGACCGCCTGCGCCAACGTCGTGGAT
AAACAGGATTGGGTTGGCATCACCAAGCTGCCAGCAACGGTCGATCACTTCCTGGCAGCG
ACGCTCCATCTCCGGGTTGTCGCGCTGTACGGAAGCAAAGTCGAGGTCGGCATCAGACTG
ACCAGATGCCATGGAAGACGCCGCGCCGCCGCCAAGACCGATGTTCATTGCCGGGCCGCC
GAGAACGACCAGCTTCGCACCAACGTTGATCTCGCCTTTTTGTACGTGATCGGCGCGAAT
GTTGCCGATCCCACCCGCCAGCATGATCGGTTTGTGATAACCGCGCAGCTCTTCGCCATT
GTGGCTGTTCACTTTTTCTTCATAAGTACGGAAGTAGCCGTTCAGTGCCGGACGACCAAA
TTCGTTGTTAAACGCCGCACCGCCCAGCGGGCCTTCGGTCATGATGTCCAGCGCGGTAAC
AATGCGCTCAGGTTTACCGAAATCTTCTTCCCACGGCTGTTCGAAGCCAGGAATTCGCAG
GTTGGATACGGAGAAACCAACCAGACCGGCTTTCGGCTTTGCGCCACGTCCGGTGGCACC
TTCATCGCGGATTTCACCGCCGGAACCGGTCGCCGCGCCCGGCCACGGAGAAATCGCCGT
CGGGTGGTTGTGAGTTTCGACTTTCATCAGAATATGCGCCGGTTCCTGATGGAAATCGTA
GCGGCCCGTTTCGTGGTCAGCAAAGTAGCGGCCCACTTCAGAACCTTCCATTACGGCGGC
GTTATCTTTATAAGCAGAGAGAACGTGATCCGGCGTGGTTTCGAAGGTGTTTTTGATCAT
CTTAAATAGCGATTTCGGCTGCTGTTCACCATCGATAACCCAGTCGGCGTTAAAAATTTT
GTGGCGGCAGTGCTCGGAATTCGCCTGGGCAAACATATACAGTTCGATGTCGTTCGGGTT
ACGACCAAGCTTTGTGAAAGCATCCTGCAAATAGTCAATTTCATCTTCCGCCAGTGCCAG
GCCAAGACGCAGGTTAGCGTCGATTAGCGCCTGACGGCCCTGCCCCAGCAAATCAACGCT
GGTGACCGGAGTCGGTTGATGGTGTGCAAACAGCTGCTCTGCATCATCTAAAGCAAAAAA
GACCGTTTCCATCATGCGGTCGTGCAGTTCAGCGGTAACCTGCTGCCATTGTTCATTGGT
CAGCGTACCGGCTTCTATATAGTAAGCCACGCCGCGCTCAAGGCGGTTTACCTGTTGCAG
CCCGCAGTTATGGGCAATATCGGTCGCTTTCGAAGACCAGGGAGAGATGGTGCCAGGACG
CGGGGTCACCAGCAGGAGTTTGCCTTGCGGGGCGTGGCTGGCGAGTGCCGGGCCATATTT
CAGCAGGCGTTCAAGTTGTGCGTGCTCATCATCGTTTAACGGCGCATTGAGGTCAGCAAA
ATGGACATACTCGGCGTAAATAGTGTGAACCGGGAGCCTGGCAGCCTGAAAACGTGCCAG
CAGTTTGTTGATTCGGAATGCCGACAATGCAGGCGAACCACGCAGAATTTCCATCATAAG
TCTCTCGTCTTCTAAGCTTTCGGTGTACCCAAGGGGGGAAACGGGCGTCATTATAAAGAA
TCTGATGCGCTGACGAAACCGTTTGCGTGGAAATAAAATCACCATCGTGAATTAGCAACG
CGTGCCGCCAATGGCTGTAATAAGTTGCCAACTGGCGCAGGTTTACGCAAAATGCCGCTC
ATTTATGAGTAAACCTTTCACTATTATTACGTTTTTTCAAGCTGGGACGCGCACGACACA
GAGAATTAACTAATTGAAAAAATTAAAGATTAATTATCTGTTCATCGGCATTCTGGCACT
GCTGCTCGCGGTCGCTCTCTGGCCATCCATTCCCTGGTTTGGTAAAGCCGACAACCGTAT
CGCCGCCATTCAAGCGCGGGGAGAGTTGCGTGTGAGCACCATTCATACTCCCTGACTTAT
AACGAAATCAACGGGAAACCTTTTGGCCTGGATTACGAACTGGCGAAACAGTTTGCCGAT
TACCTCGGTGTAAAACTGAAAGTGACCGTGCGGCAGAATATCAGCCAGCTGTTTGACGAC
CTCGATAATGGTAACGCCGACCTGCTGGCGGCAGGACTGGTCTATAACAGTGAGCGGGTA
AAAAATTATCAGCCTGGTCCTACCTATTATTCCGTGTCACAACAACTGGTTTATAAAGTC
GGTCAGTATCGCCCACGTACGCTGGGCAACCTGACGGCGGAGCAACTCACCGTTGCACCG
GGTCACGTGGTGGTTAACGATCTCCAGACCCTGAAAGACACAAAATTCCCGGAATTAAGC
TGGAAGGTAGACGACAAAAAAGGCTCTGCGGAATTAATGGAAGATGTCATCGAAGGAAAA
CTCGATTACACCATTGCTGATTCTGTCGCCATCAGCCTGTTTCAGCGCGTTCACCCGGAA
CTCGCCGTAGCGCTCGATATCACCGATGAACAACCGGTGACCTGGTTTAGCCCGTTAGAT
GGCGATAATACCCTTTCCGCCGCCCTGCTCGACTTCTTCAACGAAATGAATGAAGACGGT
ACACTGGCACGCATTGAAGAGAAATACCTGGGGCATGGCGATGATTTTGATTACGTCGAT
ACGCGCACATTTTTACGCGCCGTCGATGCGGTACTGCCGCAGTTAAAGCCCCTGTTTGAG
AAATACGCCGAAGAAATTGACTGGCGTTTGCTGGCCGCTATTGCTTATCAGGAATCGCAC
TGGGATGCTCAGGCCACTTCACCGACGGGTGTGCGCGGCATGATGATGTTAACCAAAAAC
ACCGCGCAAAGCCTCGGCATTACGGATCGTACCGATGCCGAACAGAGCATCAGCGGCGGC
GTGCGTTATTTGCAGGATATGATGAGTAAAGTGCCGGAAAGTGTGCCGGAGAACGAACGG
ATCTGGTTTGCCCTCGCCGCGTACAATATGGGCTATGCGCATATGTTGGATGCCCGCGCC
CTGACGGCAAAAACCAAAGGTAATCCTGACAGTTGGGCTGACGTAAAACAGCGTCTGCCT
TTACTTAGCCAGAAACCCTATTACAGCAAGCTGACTTACGGCTACGCTCGTGGGCATGAA
GCCTACGCTTATGTCGAAAATATTCGTAAATATCAGATTAGCCTGGTGGGTTATCTGCAG
GAGAAAGAGAAGCAGGCTACAGAAGCGGCGATGCAACTGGCGCAGGATTATCCGGCGGTA
TCGCCTACGGAGTTGGGCAAAGAGAAATTTCCTTTTCTCTCGTTTCTTTCCCAGTCGTCA
TCAAACTATTTGACCCACTCTCCCTCTCTGCTGTTTTCCAGAAAAGGGAGTGAAGAGAAA
CAAAATTAATCTGTCGAGGATTGCGCTTTTTTCTGCGCTTTAATTTCCTGGCGGCGCATG
CGAAAGAAGTCACTGAGCAACGCCGCACACTCATCCGCCAGTATTCCTTCCGTAATTTCC
ACCCGGTGATTCATACCCGGATGATGCAGCACATCCATTAAAGATCCCGCAGCGCCAGTT
TTCGCGTCACGCGCACCAAAGACCACGCGACCAATGCGACTGTGGATCATCGCTCCGGCA
CACATTACACAGGGTTCAAGCGTGACATACAACGTGGCGTCGATCAGACGATAATTTTGC
ATCACCAGACCGCCCTGCCGTAGGGCCATGATTTCTGCATGTGCGGTGGGATCATGTCGA
CCAATCGGACGGTTCCAGCCTTCGCCAATAACACGATTGTTATGCACTAATACCGCGCCG
ACCGGTACTTCCCGCTCATCCCAGGCACGCTTCGCCAGCGTCATTGCATGACGCATCCAG
TATTCGTGGCTAAATTCGACTTCAGACAAAAAGAAAACTCCGATTATAAAAGCGCGGCGC
ATTATACACGGCCGCTATGCTTTACTCTATTCCAGTTGCTGGAGTTCACCGCGCGGGGTT
ACTCGCCAACGATGCTGACAGAAATAAAGCAGCGGGTTGTCCTGATTACTGTCGCTATAG
CCACTGTACAGCCGCAGCGGCGTGCCGATTTTGCGCTCCAGTTGCGCGACCTTTTCATGT
CCCAGACAACGCATCGTCAATACCCAACCACCATAGCCACGCTGAATCTGACTGGCGATA
AGATTAACCCGCGGCAGCCAGGGCGTATCGAAATAAACCGCTTCAACCAGCGACTGCGGA
GAGCCGGTAATCAACCAGATATCAGCATCGGAACTTAACAGGTAGGTGGTTAATCGCTCC
TGAACCAGCGGAAAGGCGGTAACATTGTCACGAAACCAACGTACGAAATCGGCCTGCAAC
GCCTGCAAACGCGCTTCATTGTGACCAAAAGTGCATCCCCACAGAAGCAGACTCATCGGC
CAGCGTGCCGCACGACCTTTTATCAATAACGCAATGGCTATGATCGGCAACAACGGCAGA
ACAAGTAACGCATTCAGCGGTTGGCGACGCAGTAAATAACGCAAAAAACTGCCGAACATA
TCCTGCTGATGCAATGTTCCATCTAAGTCAAAAAACACCACACGACGCTCGTGAGTTGCC
AAACCATACTCCTCTGGACTGAAACATCCTGATTAATTTTCGCTACTACATAGCCTAACA
GATAGATCATCACTTTTCCGGCAACAATCGACCGCATCATGGCTAACTGGAATTTTTAAT
TCATGGCAATTAGCGGCAATGGAATATAAAATTCACTCGCGTTTGTCTCATATTGCCTGT
TGTCGCCACTATTTCATCGCGAGGAAAGATATGAACGGCTTACTTCGTATCCGTCAGCGT
TACCAGGGGCTTGCCCAGAGTGATAAAAAACTGGCGGATTATCTGCTGCTACAACCTGAT
ACGGCGCGCCATTTAAGCTCTCAGCAACTGGCCAACGAAGCCGGAGTCAGTCAGTCCAGC
GTCGTGAAGTTCGCGCAAAAACTCGGCTATAAAGATTTTCCGGCACTAAAGTTGGCGTTG
AGTGAAGCGCTGGCAAGCCAGCCGGAATCTCCCTCCGTGCCCATTCATAACCAAATCCGC
GGTGATGATCCGTTACGGCTGGTCGGCGAAAAACTGATTAAAGAAAATACTGCCGCTATG
TACGCAACGTTAAACGTTAATAGTGAAGAGAAACTGCATGAATGCGTGGCAATGTTGCGC
TCTGCGCGGCGGATAATTCTGACCGGTATTGGCGCTTCGGGTCTGGTGGCGCAAAACTTT
GCCTGGAAGCTGATGAAGATTGGCTTCAATGCTGCCGCAGTGCGCGATATGCATGCGCTA
CTCGCTACAGTACAGGCGTCGTCCCCTGACGATCTGTTATTAGCCATTTCCTACACCGGT
GTACGACGCGAGTTAAACCTGGCGGCAGATGAGATGCTGCGAGTGGGCGGAAAAGTGCTG
GCTATTACCGGCTTTACTCCCAATGCCCTGCAACAGCGTGCTTCTCATTGCCTGTATACC
ATTGCCGAAGAACAAGCGACAAACAGTGCTTCAATCTCTGCTTGTCACGCGCAGGGAATG
TTAACGGATTTGCTGTTCATTGCGCTGATTCAGCAGGATCTGGAACTGGCACCAGAACGT
ATTCGTCATAGCGAAGCGCTGGTGAAAAAACTGGTCTGAGTAAAGAATGCGCGTATAATG
CCCGCCCGGTTTGTGTTGTTTTGAGAGTTTCCTTATGGCGCTGTTAATCACTAAAAAATG
CATCAATTGTGATATGTGTGAACCCGAATGCCCGAATGAGGCGATTTCGATGGGTGAACA
TATCTACGAGATTAACAGCGATAAGTGTACCGAATGCGTAGGGCACTACGAGACACCAAC
CTGCCAGAAGGTGTGTCCGATCCCCAATACTATTGTGAAAGATCCGCAACATGTCGAGAC
GGAAGAACAGTTGTGGGATAAATTTGTGCTGATGCACCACGCGGATAAAATTTAATATTC
TGCTCTGGAAGTAGAGTGTTAATTATTTTATAGGAAAATCTTAACGCTATTATATTTATT
TAAATGATGATATTAGCATAATGATTCACTAAGTTAATTTATATAGTATCTGCCCAGACA
CTTATTTATAGTTATTAAAGGCGCGTCCGATTGGTTCACCGGACGCACCTTAAGTACGTT
TCCTTGTGTTATAAGAACAAAAGGAGCAGCTGTAAAACAGCAATGATGATTTTGATGACC
CGTTTAATCAGGTATCGGCAATCAGTCATTCGTTTTTCCTTAAACAAGGAATGCAGCCGT
TCAGATTAGCCCTTACATCTCCCCAAAACTGAACGTGCGAGTTATTGGAATCGAGTGCTG
CACTCCACACCAGAGCTTTGACGACACCACTCGTTTCAATGGGGGAATTCAGTGGCATGG
TGTAAAGCACAGCAAAATTGCCAATAACGAAACCGATTTTAATGTACTTATCAAAAAGCG
GTCACGTTAATCTTTTCATCAATGTCGATTTCTTCGTAAAGGCTCGCGTTTTTTATGTCA
GAGATTGCAAGTTGCTTGTACAGGTCAACGAAATTGATCCATAATCATTTTCGTTGGAAT
CGTGTGCTGCACAAAATTAAAGTTAAAAGTAAAACCCCCGTTCCTTACCAGTTCGGGGGT
TTTACTTTATAAAGAGAACGGTATTATTTTAACTTTCAATAATTACCGTGGCACAAGCAT
AGTGGCGCTCATCGGCAAGCGTTACATGCATATTTACAACGCCGAGCTTTTCCGCCAGTT
TTAATGCCTCACCCCATAGCCGTAGCCGTGGTTTGCCGAGCTCATCATTGAATACTTCAA
ACTGATTAAACGCCAGACCATTGCGGATCCCTGTGCCAAATGCTTTTGCCGCCGCTTCTT
TCACAGCAAAACGCTTCGCCAGAAAACGCACTGGCTGGTGGTGCGTTTTCCAGATTTCCC
ATTCGTTATCGCTTAATACGCGGCGTGCCAGGCGTTCACCGGATCGGGCGATCACCGCTT
CTATGCGAGCGATCTCCACAATATCCGTACCTAAACCTAATATTGCCATTAGCCACGCGC
TTCCAGCATCAGACGCTTCATTTCTGCCACCGCATCTTTCAGTCCGGTCATCACTGCACG
ACCAATAATGGCATGACCGATATTCAGTTCATGCATCTCAGGGATGGCAGCAATAGCTTT
CACGTTGTGATAGGTCAGACCGTGACCAGCGTTAACTTTCAGACCGAGACTGGCGGCAAA
GGTCGCGGCTTTGGCGATACGCGCCAGCTCTTGCGCCTGTTCGGCGTCAGTTTTGGCATC
AGCATAGCAACCTGTGTGGATCTCGATAAACGGTGCGCCAACCTCTGCCGCAGCTTTGAT
CTGCTCTTCATCGGCGTCGATAAACAGAGAAACCTGGATCCCGGCCTCCGCCAGACGTTT
ACAGGCATCGCGCATTTTGTCACGCTGCCCTGCGACGTCCAGGCCGCCTTCGGTTGTTAC
TTCCTGACGCTTTTCCGGTACCAGACAGCAAAAATGTGGCTTCGTCTCAACGGCGATCGC
CAGCATCTCTTCGGTCACCGCCATCTCCAGATTCATGCGGGTATCCAGCGTCTGACGCAG
GATGCGCACATCGCGGTCGGTAATGTGGCGGCGATCTTCACGTAAATGCACGGTAATGCC
GTCTGCTCCCGCCTGCTCGGCAATAAACGCCGCCTGCACCGGATCCGGGTAAGCAGTACC
GCGTGCGTTACGCAGCGTTGCAATATGGTCAATGTTGACGCCTAACAGTAATTCAGCCAT
GACAATCCTCATCATTCATAATGTGTTTTCACCGTTCGCTTAGGCATAAACTGCCGGAAC
AGTTCCCTGCTCTTTAATGGTTTACCGCCAAGATACGGCTTAAGCGCCATGCGGGTAAAG
CGTTTCGCGGCGCGCAGTGTGTCTGCGTCAGGAAATTCCCGCGCGTTTAACGCTTTTAAC
TGCCTTCCGGTGAACGTTTTATTGTCGATAACGACGCTTGCGATAAACCCTTTTTCTTCG
CGATAACGATACGTCATGGTGTCATCTACCGGCTCGCCGCTACCCACACAATGGGTAAAA
TTGACGCCATAGCCCAGATGCCCGAGCAGTGCCAGTTCAAAGCGGCGCAGCGCGGGTTCT
GGCGTACCAGTGGCACCTGCAAGTGACTGAATGCAGTGCAAGTAATCGAAAAAGAGTTCA
GAGAAGCGCGTCTCGTATTCCAGTACGCGGGAGAGAAGTTCGTTGATGTACAGACCGCTG
TAAAGCGTGATACCGCTTAATGGCAGCGCCAGCGAGACGGCTTCAGCACTGCGCAGCGTT
TTTACTTCGCCACGCCCGCCGAAACGTAGCAAGAGAGGGGTGAAAGGCTGTAATGCACCT
TTCAGAGTAGAGCGTTTAGAGCGTGCGCCTTTGGCAACCAGACGCACGCGACCCGATTCC
TCCGTGAAGACGTCCAGCATCAGGCTGGTTTCGCTCCACGGGCGACTATGCAGGACAAAT
GCGCGCTGCCAGCCTTCCATCGGAGTTACTCTTAAAGATCGTCAACGTAACCGAGACTGC
GCAGTGCGCGTTCGTCGTCGGCCCAACCGGATTTCACTTTTACCCACAGCTCAAGGTGAA
CAGGCGCTTCGAACATTTCCTGCATGTCTTTACGCGCTTCAATCCCGATGGTTTTGATCT
TGGCCCCTTTGTTGCCAATAACCATCTTCTTCTGCCCTTCACGCTCAACGAGAATCAAAC
CGTTGATGTCATAACCGCCGCGTTCGTTAGAGACGAAACGTTCGATCTCCACGGTCACGG
AGTACGGCAGTTCAGCGCCGAGAAAACGCATCAGTTTTTCGCGGATAATTTCAGACGCCA
TAAAACGCTGTGAGCGATCGGTGATGTAATCTTCCGGGAAGTGATGGGTCGCTTCAGGCA
GATGCTTACGCACGATTGCCGCGATAGTGTCGACATTCAGCCCGGTTTCGGCAGAGATCG
GCACGATATCGAGGAAGTTCATCTGGCTTGCCAGGAACTGTAAGTGTGGCAGCAGATCGG
CTTTTTCCTGCACGTTGTCCACTTTGTTCACCGCGAGGATTACCGGCGCTTTGCCATCAC
GCAGCTTGTTGAGCACCATTTCATCGTCCGGCGTCCAGCGGGTGCCTTCTACGACAAAAA
TCACCAGCTCAACGTCGCCAATGGAGCTGCTCGCCGCTTTGTTCATCAGACGGTTAATAG
CGCGTTTTTCTTCCATATGCAGACCTGGGGTATCAACGTAGATCGCCTGATACGCGCCTT
CAGTATGGATCCCCACAATGCGGTGACGAGTTGTTTGCGCCTTGCGGGAGGTAATGGAGA
TCTTCTGCCCCAGCAGTTTGTTCAACAATGTGGATTTGCCAACGTTCGGACGTCCGACGA
TAGCAATAAATCCGCAGTAACTTTTATCGATGCTCATTCCAGCTCCAGTTTTTTCAACGC
CTGTTCGGCGGCAGCCTGCTCAGCCTTACGACGGCTTGAACCTGTGCCAACCACCGGTTC
ACTCAGGCCGCTGACCTGGCAGTGGATAGTAAATTCCTGATCGTGCGCTTCGCCACGTAC
CTGGACTACCAGATAAGTTGGCAGCGGCAGATGGCGACCCTGCAAATATTCCTGCAGACG
CGTTTTCGGATCTTTTTGTTTATCGCCTGGGCTAATTTCGTCCAGACGAGTTTGATACCA
GTTGAGGATTAATTTCTCGACGGTTTGAATATCACTGTCGAGGAATACGCCACCAATTAA
TGCCTCGACGGTGTCGGCGAGAATTGACTCACGACGAAATCCACCGCTTTTAAGTTCACC
TGGCCCTAAACGTAAGCACTCACCTAACTCAAATTCGCGCGCCAGTTCAGCCAGCGTATT
ACCACGGACCAGCGTGGCGCGCATCCGGCTCATATCGCCTTCATCCACACGAGGGAAACG
GTGATAAAGCGCATTGGCGATAACGTAGCTCAGAATAGAGTCACCTAAAAATTCTAAACG
CTCGTTATGTTTACTGCTGGCACTACGATGAGTTAATGCCTGCTGCAACAGTTCCTGATG
ATTAAAAGTGTAGCCCAGCTTCCGTTGAAGCCGATTAATTACGATGGGGTTCATGCGATA
CCAATAAATAAATGCGTCAACAATTCAGCACACGAAACAGACCTGATATACATGGCTCGG
CTAACTGCTTCACTGCAGTTTCAGTTTACCGGTATATGGGGACCAACGCTGTTTCGTGTG
CCGTGGCAACCTGGAGGTGCCAACCTTAAACTTCGGGGGAATATTCTATACACAACGACG
GGGGATGTCGTTAGCCACGGGAGATTTATCTCATAAATAATTCACGTTGTCGCCATAACG
GCGACAACGTGACGAAGATGGCTATTAATGGATACCGCCAATGCGACTTAAGCGCACACC
AGTCGGCCATTCGCCTTCTTGCTTATCGAAGCTCATCCAGATAGCCGTTGCCCGACCGAC
CAGATTCGCTTCAGGCACAAAGCCCCAGTAACGGCTGTCCGCGCTGTTGTCGCGGTTGTC
GCCCATCATGAAGTATTGTCCCGGCGGAACAATCCAGGTTGCCAGTTGTTGCCCTGGCTG
CTGGTAATACATCCCCACCTGGTCCTGCGCAATCGGCACTGTCAGAATGCGGTGCGTCAC
ATCACCCAATGTCTCTTTACGCTCGGAAAGACGAATTCCATTTTCTTTGGTTTCGTTTTT
CGGCACTTCAAAGAATCCGCTGGTCGCTTCCCCACCATTACGGCGTGAGAAGGTCTGAAC
GAAATCGCTCGGTTCCACGTTGGAGTAAGTGACCGGTAGCGCGTTTTCGCACGCCTGGCC
GGAACTGCATCCCGGTTGAATCGTCAGCTCTTTTGAGACCGGATCATAAGTGACTTTATC
GCCCGGCAAACCCACCGCGCGCTTGATGTAATCAAGCTTTGGATCTTCCGGATATTTAAA
GACCACGATATCGCCGCGTTTCGGATGACCGGTTTCGATCAGCGTTTTCTGGTAGATAGG
ATCTTTAATGCCATAAGCAAACTTCTCTACCAGAATAAAATCACCGATTAACAGAGTCGG
CATCATCGAACCTGACGGGATCTGGAACGGTTCATAAATAAACGAACGCACAATCAATAC
GATAGCCAGCACCGGAAAAACAGAAGCACCGGTTTCCAGCCAGCCAGGCTTCGGCGCAAC
TTTCTTCAGCGTTGCTTTATCCAGTGAGTCACCGGCAGCCGCCTGCGCCGCTGCCTGACG
TTCCCGCCGTTTAGGTGCGAAAAAGAATTTATCCACGCACCATAAAATGCCCGTCACCAG
TGTGGCAATCACCAGAATCAGGGCAAACATATTCGCCATGCCAACTCCTAAGGGTTATTT
GTTGTCTTTGCCGACGTGCAGAATGGCGAGGAACGCTTCCTGCGGCAGCTCGACGTTACC
GATCTGCTTCATGCGTTTCTTACCTTCTTTCTGCTTCTGCAGCAGCTTTTTCTTACGACT
GATATCGCCGCCATAACATTTAGCCAGTACGTTTTTACGCAGCTGTTTCACGGTGGAGCG
CGCAATGATGTGCGTACCAATCGCTGCCTGAATGGCGATATCAAACTGCTGGCGCGGGAT
CAGATCTTTCATCTTCTCCACCAGCTCGCGACCGCGGTTTTGCGAATTACCACGGTGGGT
GATCAGCGCCAACGCATCAACACGTTCACCGTTGATTAATACGTCTACACGAACCATGTC
GGACGCCTGGAAGCGTTTGAAGTTGTAATCCAGAGACGCATAACCACGCGAGGTAGATTT
CAGGCGATCGAAGAAGTCGAGCACCACTTCCGCCATCGGGATCTCGTACGTCAGCGCCAC
CTGATTACCGTGGTAAACCATATTGGTCTGCACGCCGCGTTTTTCTACGCACAGTGTAAT
AACGTTGCCGAGATATGCCTGCGGCAGCAGCATGTGACACTCTGCAATCGGCTCGCGCAG
TTCGTAGATGTTATTTACCGCTGGCAGCTTGGATGGGCTGTCGACGTAGATAACTTCTCT
TGACGTGGTTTCAACTTCATACACTACGGTCGGCGCAGTGGTGATCAGATCCAGATCGTA
TTCACGTTCCAGACGTTCCTGGATGATCTCCATGTGCAGCAGGCCGAGGAAGCCGCAGCG
GAAACCAAAGCCCAGCGCGCTGGAGCTTTCCGGCTCATAGAACAGTGAAGCATCGTTCAG
GCTGAGTTTGCCCAGCGCGTCACGGAAGGCTTCATAGTCGTCGGAACTTACCGGGAACAG
ACCGGCGTATACCTGCGGTTTGACTTTCTTAAAGCCAGGCAGCGCCTTTTCTGCCGGATT
ACGCGCCAGCGTTAAGGTATCGCCTACTGGAGCGCCGTGGATATCTTTAATCGCACATAC
CAGCCAACCTACTTCGCCACATTTCAGTTCAGTGCGGTCAACCTGTTTTGGCGTGAAGAT
ACCCAGACGGTCGGCGTTATAGGTCTGCCCGGTACTCATGACTTTCACTTTGTCGCCCTT
ACGCAGGGTGCCGTTTTTAATACGGATAAGTGAAACAACGCCCAGGTAGTTGTCGAACCA
GGAGTCGATAATGAGTGCCTGCAACGGGCCTTCCGGATCGCCTTCCGGCGGCGGAATGTC
GCGCACCAGACGTTCGAGAACGTCCTGCACGCCAACGCCGGTTTTCGCTGAACAGCGCAC
CGCGTCGGTGGCGTCGATGCCGACAATATCTTCAATTTCTTCCGCCACGCGTTCAGGATC
GGCTGCCGGCAGGTCAATCTTGTTCAGTACCGGCACCACTTCGAGATCCATTTCCATGGC
GGTGTAGCAGTTTGCCAGGGTTTGCGCTTCTACGCCCTGCCCGGCGTCGACCACCAGCAA
TGCACCTTCACAGGCAGCCAGCGAACGAGAAACTTCATAAGAGAAGTCAACGTGGCCCGG
GGTGTCGATAAAGTTAAGCTGATAGGTTTCGCCGTCAGACGCTTTGTAGTCCAGCGTCAC
GCTTTGCGCTTTGATGGTAATGCCACGCTCACGCTCAAGATCCATGGAATCGAGAACCTG
CGCCTCCATTTCACGGTCAGACAGGCCACCGCAGATCTGGATAATACGGTCAGACAGCGT
CGATTTACCGTGGTCAATGTGAGCTATGATCGAAAAGTTACGTATATTCTTCATAAAGTA
TGATTATTGTGCCTTAATGCCCGGTTAACCAGGCTTTTAGAAGTCGCTGTTCTGAGCTTA
ACGTCTGTATTAATAGAAACGCCGCATTCTACACTACAACATTGAGGCGAGGAAATGTTC
ATACCGTATGGATTGTGGTATCTGGAAACGTCCTCGCATTTGTTATGCAAAATGCAACAA
AGCCAGTGAAATCACTGGCTCGCGTCTTCCGAAGATGTTTCAAATCGCACAAGGCCAGGC
GGCAATGCCACGCTTAAGATGATCGGTTGCCATTCAGACCGGGCAGCAAACTTTCGAGAG
CAGCCACGTGCAATCAGGAATCCACCAACGCCACCGAGAATCGCACCGCATAATGCTGCA
ATATCTGAAGCAAAGAGTAGCTGAAATAGTGAAGCGATGAGGAATAGTCCCATCAACGGC
GACATATAAACCAGTAATGCGGAGCTAAGCAGGCTGCCTTCGGCGATTCCTAATTCTACT
TTTTGCCCCGGCACTAACGGCTCATCACAGGGTACGACAATGGTATGCGTGGTTTGCGGG
CCAAGTTTATTCAACACGCGGCTACCGCAACCGGCACGTGAAGCGCAGCTGCTGCATGAG
GCTTTAACATCACAACTGACCAGCGCCTGCCCGTTTTCCCAGGAGACGACGGTAGCCCAC
TCTTTGATCATTGCGCTGCCCCGAACTTAATATTCTCGGCAATGCGTTTCGCCGTTTGCG
GCGGCAGTTCACCGACAATGGTGATTTCGGCGTTATCACGTACGCTTGTACTGACGGTTC
TGCGTCCGGTGCGCAACATCTGATCGGTGCTCGATGGCGTAGCGCGGTTAACGTTTACCG
AAAAGCTGAATAATCCGTCGGAATAGAGACGTGATTCGATAGGCATGTTGTCCATCGTCG
GTAGCGGACGTCGGCTACTGGAAACTTCGCTAAAACCCTGTGGCAACCAGGTTGGCGTCC
AGCTGAATTTAGCTTTTTCACCTACAGGAACAGAAAGCAACGGCGGCAAATTTGCCTTCG
CCAGCGTCTGCATACTGCTGCTGATATCCTGATTGACATTAAAAGCAATCACGCGAAATT
GTTCCAGCGTTTCACCATCGCGATCAAGGAGATCAACCCTCATCGGTAATTTCGATTCGG
TGTCCATCCACACGATGTAGCTGTAGCGTGTACCATCTCGGGCAACCACGCGAATAACTT
CGCAAAGACGATCAGCAATACGCGTGCGCCCGACGGAGATAAAGTCGTAGTAAGGAGAAA
GGCGTTTGAAATCGGTATAGATGAGCGATGGCAGAGAATCAACAATGTAATCGCCATTAA
GCGTGAACGGTTCAAGTCCCGGTTCAAAATAGCTGATTTCATTGCCGCGCTGTACCACTT
CCCGGCGCGGGCCATCCATTTGCAACAATTGTGCAAGAGGACGGTTATCGAGGCGTGCAT
GTCGATAACGCAGAGACTCAACACCCTGTTTATTGATGCTGATGAATGACAGCTCGTAAT
TCAGTGACTGACTGGCCAGGTTCATCTGCTGTAATAACGCCCCGGACGCGGGAGTGGCCG
AGGCGTTAGCAGAGAATAACAGGCTACCTGTCACTAATGACATGGCAAACCAAAGTTGCT
TCATTACTGCGATTGCGTTCCTAAAGTTTGAATTCCTGGCACCTGTACAGCGGCTTGCTG
GGTTTGCGCCTGCTCAAACTGAAGCTGTTCAGAGTGGAGTCGGCGTTGCAGTTCGTAATC
CTGCAACATTGCATTAATGCGACGACGCTGCTCCTGTACCTGCTGCTGTTGACCATTATT
TGCGGTCGCTTCAGAAGGTACTCCCAGGCTAACCGGGCTGGCTTTACCCATCATCGGCAG
TGTATTAAATACCGGCGTTTCGGGCTGCTGGGACGTTTCAGATTGTCCATTATAGTGCTG
GACGCCAACGATAACTGCAAGCGATACGCATGCGGCTACGCCCATTTGGGTAAGCTGTGC
CGCCCACGGACGTACTTTCTGCCAGAATGGCATTTTCTGCCATTGATGCGGCGCAGGCTG
GGCTTCCGGGATCAATGTCGCCGGTTGACGTACTGGCTCTTCTTCAATGGCGGCCATCAC
GCGTGAAGAGATATCGAAATGGAGCACCTCGGGAGTATCACCCCGCATTGAGTCACGGAT
TAAGTGATAGCTTTCCCAGGTTTTCTGCATTTCTGGGTTATGAGCCAGTTCGTTAAGCAG
CTCACTATCCAGCGTTTCGCCATCCATTAAAGCGGAAAGTTGTTCTTTCTGCATGCCTAA
TACCCTTATCCAGTATCCCGCTATCGTCAACGCCTGATAAGCGGTTGAACTTTGTTATCA
ATAGCTTCCCTCGCTCGGAAGATACGTGAACGCACCGTACCTACCGGACAATCCATGATA
GCGGCTATCTCTTCATAGCTCAGGCCATCCAGCTCCCGCAAGGTTATTGCCATGCGTAAA
TCTTCCGGGAGGGACTCAATAGTTCGGAAAACTATCTGTCTCAGTTCTTCTGACAACATT
AAGTTCTCAGGGTTCGAAATTTCTTTCAACGCGCCGCCACTTTCGAAGTTTTCAGCTTCA
ATGGCATCCACATCACTGGAAGGTGGACGACGCCCCTGAGCAACCAGGTAATTTTTCGCT
GTATTTACAGCAATCCGATACAGCCATGTATAAAAAGCGCTATCTCCCCGGAACGAATCC
AGCGCACGATAGGCTTTAATAAAAGCTTCTTGTACCACATCGGGAACATCACCCGACGGC
ACATAGCGGGAAACCAGACTCGCCACTTTATGCTGATAGCGCACTACCAATAAGTTAAAG
GCTTTCTGATCTCCCTTCTGGACCCGTTCAACCAGGACCTGGTCCGTTAACTGCTCGCTC
ATCCGAGGTAAAGTCTCCCCAAACCAAATTTCCACGCGCTATCGAAACGCCACTCCATTA
GCTGCAATTTGAGCAAGCAAAGGGTTAGAGTGTCTCGTTTTTGTAAAGTTCCGTAACGCA
TCTGTTTTTGTTTGTCATGCTGTAGACGGATCATTATCTATCATTATAAGTCTACAGAAT
CTGAACATCGCATTATCTGTGTAGAAATGCCCATTTAACTGCCTGAAGAGTAACCCAACG
GCCTTTTTATTTCACCACCTAATCCTCCACCAGCCAGTAACTTCTCTTTTTCTCGCCGCC
CTGCGTCAGCGTGTTTAGCCACTGTAACAAATATTAAAATAGCAGGTGTTTAATCGCACA
ACATGATGCTATGCTGACCAAACCGTGTTTAGTAAATTAAACAAAGAAAATGAATACTCT
CCCTGATCATTCATGTGACGTGTTGATTATCGGTAGCGGCGCAGCCGGACTTTCACTGGC
GCTGCGCCTGGCTGATCAGCATCAGGTCATCGTTCTAAGTAAAGGCCCGGTAACGGAAGG
TTCAACATTTTATGCCCAGGGCGGTATTGCCGCCGTGTTTGATGAAACTGACAGCATTGA
CTCGCATGTGGAAGACACATTGATTGCCGGGGCTGGTATTTGCGATCGTCATGCAGTTGA
ATTTGTCGCCAGCAATGCACGATCCTGTGTGCAATGGCTAATCGACCAGGGGGTGTTGTT
TGATACCCACATTCAGCCAAATGGCGCAGAAAGCTACCATCTGACCCGTGAAGGTGGACA
TAGTCACCGTCGTATTCTTCATGCCGCCGACGCCACCGGTAGAGAAGTAGAAACCACGCT
GGTGAGCAAGGCGCTGAACCATCCGAATATTCGCGTGCTGGAGCGCAGCAACGCGGTTGA
TCTGATTATTTCTGACAAAATTGGCCTGCCGGGCACGCGACGGGTTGTTGGCGCGTGGGT
ATGGAACCGAAATAAAGAAACGGTGGAAACCTGCCACGCAAAAGCAGTGGTACTGGCAAC
CGGCGGTGCGTCGAAGGTTTATCAGTACACCACCAATCCAGATATTTCTTCTGGCGATGG
CATTGCTATGGCGTGGCGCGCAGGCTGCCGGGTTGCCAATCTCGAATTTAATCAGTTCCA
CCCTAGCGCACTGTATCACCCACAGGCACGCAATTTCCTGTTAACAGAAGCACTGCGCGG
CGAAGGCGCTTATCTCAAGCGCCCGGATGGCACGCGTTTTATGCCCGATTTCGATGAGCG
CGGCGAACTGGCCCCGCGCGATATTGTCGCCCGCGCTATTGATCATGAAATGAAACGCCT
CGGTGCGGATTGTATGTATCTCGACATCAGCCATAAGCCTGCCGATTTTATTCGCCAGCA
TTTCCCGATGATCTATGAAAAACTGCTCGGGCTGGGCATTGATCTCACAAAAGAACCGGT
GCCGATTGTGCCTGCTGCACACTATACCTGCGGTGGTGTAATGGTTGATGATCATGGGCG
TACGGACGTCGAGGGCTTGTATGCCATTGGCGAGGTGAGTTATACCGGCTTACACGGCGC
TAACCGCATGGCCTCGAATTCATTGCTGGAGTGTCTGGTCTATGGCTGGTCGGCGGCAGA
AGATATCACCAGACGTATGCCTTATGCCCACGGCGTCAGTACGTTACCGCCGTGGGATGA
AAGCCGCGTTGAGAACCCTGACGAACGGGTAGTAATTCAGCATAACTGGCACGAGCTACG
GCTGTTTATGTGGGATTACGTTGGCATTGTGCGCACAACGAAGCGCCTGGAACGCGCCCT
GCGGCGGATAACCATGCTCCAACAAGAAATAGACGAATATTACGCCCATTTCCGCGTCTC
AAATAATTTGCTGGAGCTGCGTAATCTGGTACAGGTTGCCGAGTTGATTGTTCGCTGTGC
GATGATGCGCAAGGAGAGTCGGGGGTTGCATTTCACGCTGGATTATCCGGAACTACTCAC
GCATTCCGGTCCATCGATCCTTTCCCCCGGCAATCATTACATAAACAGATAAAAAGCCTG
GGTCAGCGCCGTATACGCTTCGGAATAGTTCTGGTCTGGCCCACGAATGACTAAGCGATC
GCTAAAGCATTCTCCTGCCTGCGGGGAGAATGCCAGCAGCACCCGATGCGGCAGTCGCGC
TTCGTTTTCCGCCACATCCGTCCGCAAACGTAAATGCCAGCCCATACTTAATGCCAGTTC
AGTAAAACCATTACCAATCTGCTCTGGCAGCACCACGCAGAAAAATCCCTCTTCGGTAAT
GCACTCCGCCGCACAGGTCAGCAACGATGGGTGATCAAGCGTAGTGGTATAGCGAGCCTG
TTCCCGTTGAGGTGTCGCGCACTCTACTCCCTGCTGATAGTAAGGTGGGTTGCTGATGAT
TAAATCGAAGCGTACTGTCTGCTGTGTGATCCACTGCAGAATATCCGCCGTATGGACGTT
AATCCGCTCTGCCCACGGGGACTGGTTGATATTTTCCTGCGCTTGCGCGGCAGCTTCACT
TTCCAGTTCAACTGCATCAATCATCACGCTGTCATCTGTTCGCTGCGCCAGCATTAATGC
CAACAACCCGCTACCCGCGCCGATATCAAGGCAACGTTTTACCCCAGCCACAGGTGCCCA
TGCGCCCAGCAAAATGCCATCCGTTCCCACTTTCATCGCACAGCGATCGTGAGCAACAAA
AAACTGTTTAAAAGTAAATCCATTACGACGAAACACGGATGTAGACTGTGACATGAAAAT
AAAACCTTGCAGGAAAAACGGCGATAGCACCGGGTGAGAACAATACCCGAGAAACGATAT
CCATACAAACAGATGAAGATTGCAGCCGTAACGTCTATAATCAGCGCCCCACACAGAGGT
AGAACATGACTGTAACGACTTTTTCCGAACTTGAACTCGACGAAAGCCTGCTGGAAGCCC
TCCAGGATAAAGGTTTCACTCGCCCGACCGCCATTCAGGCTGCCGCCATTCCGCCTGCGC
TCGATGGCCGTGATGTACTCGGTTCTGCGCCGACAGGCACCGGTAAAACGGCGGCGTATC
TGCTGCCAGCGTTGCAGCACCTGCTCGATTTCCCACGTAAGAAATCCGGTCCGCCGCGTA
TTTTGATCCTCACCCCAACTCGCGAGCTGGCGATGCAGGTGGCCGATCATGCCCGCGAAC
TGGCGAAACATACGCATCTGGATATTGCCACCATCACCGGCGGCGTGGCCTATATGAACC
ACGCAGAAGTGTTCAGCGAAAACCAGGACATTGTGGTCGCCACGACCGGACGTCTGCTGC
AATACATAAAAGAAGAGAACTTCGATTGCCGCGCGGTTGAAACGCTGATCCTCGACGAAG
CAGACCGTATGCTGGATATGGGCTTCGCCCAGGATATTGAACATATTGCTGGCGAAACGC
GCTGGCGTAAACAGACCCTGCTCTTTTCGGCAACGCTGGAAGGCGATGCGATTCAGGACT
TTGCCGAGCGTCTGTTGGAAGATCCGGTGGAAGTTTCTGCCAATCCGTCCACCCGTGAGC
GCAAAAAAATTCATCAGTGGTATTACCGCGCCGATGATCTTGAGCATAAAACCGCGTTGC
TGGTGCATCTGTTAAAACAGCCGGAAGCGACCCGCTCAATTGTGTTTGTGCGTAAGCGTG
AGCGTGTGCATGAGTTGGCAAACTGGCTGCGCGAAGCAGGCATCAACAACTGCTATCTCG
AAGGTGAGATGGTACAAGGCAAGCGTAACGAAGCGATTAAACGCTTGACCGAAGGCCGCG
TAAACGTACTGGTTGCTACCGATGTTGCCGCGCGCGGTATCGACATTCCTGACGTCAGCC
ACGTCTTTAACTTCGATATGCCGCGCAGTGGCGATACTTATTTGCACCGTATCGGACGTA
CCGCGCGCGCCGGTCGTAAAGGCACCGCGATTTCGCTGGTGGAAGCCCATGACCATCTGC
TGCTGGGCAAAGTTGGCCGTTATATTGAAGAGCCAATTAAAGCTCGCGTAATTGATGAGT
TACGTCCGAAAACGCGTGCGCCAAGCGAGAAGCAGACCGGCAAGCCATCGAAGAAAGTGT
TGGCTAAACGTGCCGAGAAGAAAAAGCTAAAGAGAAAGAGAAGCCGCGGGTGAAAAAACG
CCATCGCGACACTAAAAATATTGGTAAGCGCCGTAAACCAAGCGGAACGGGCGTGCCACC
GCAAACGACAGAAGAGTAATCTCAATGCCGGGTTTAAGCCCGGCATTGTTTTTATCCCGG
CAAAAAACACTCTTCAACACACTGAATAAAAGTGTGCATCGCCGGGCTAACCGCTTTTCC
GGCATGGTGAGCGCACATTGCCGTAAGGGTCTGCGACTGTTCGCCAAAAGGCAATTCAAT
TAATTCTCCGCACTCCAACTCTTTTACCACCGCAAAACGCGGCAGGTAACTGACTCCGAT
ATTTGCCGCGACACAACGCTTGATGCTTTCGATACTTATAAGCTCAATGGTGTTTTCCAC
CGTGATCCGCCGCTGGCGCAGCGTGCTCTCAAATATCTGCCGGAAGACACATTGTGGTTC
GTTGATAATAAAGCTACAGGCGTTATGTCTTCCCGGCTCAGTAAAATCGACATCTGCAAT
TTGCGGTGAAGCCACCAGCGCCAGCGGTTGTTCACCCAACTCTCGTCGGTTCAGAGCATC
ATCATTCCCTACGCGATAAAAAACCCCGACATCGGCCTCATCATTCAGTAGCGCATCACG
GATCACGTAACAGTTCAGCGACTGCAACGATAAACGCACTTTTGGAGCGCGTTGCCGAAA
ACGCTGCAACACCTGCGGCATTCGATAAGAGAGCAACGTTTCGCCTGAAATAACGCGTAG
TTCCCCGTCCGGATCCGACTCTTTTTTAGCAGCCTCACGAAGCGTATCCATCACTCGGGT
AAGTTCATAGATGTGCGGCAGCAGCTTTTTTCCTTCGCGGGTAAGGCACATTCGTCGACC
AATTTTCTCAAACAATTGTACCGAGAACTCCTGCTCAAGCTGCTGAATATGAAAAGTCAC
CGTCGATTGTGTGCAGCACAATTTTTGCGAAGCTCGCAAAAAGGAACCCTCTTCCACCAC
GGTTTTAAGTGTAATAAAACGGCGCAGATCCATAACCCCAAACCTATCGAAAATATCGAA
TTTAGAATGTAAAAACATTCATTTTTTTAAATGTTCCGTGTCGGGTACTGTCTACCAAAA
CAGAGGAGATAACAAGTGACACCGACCCTTTTAAGTGCTTTTTGGACTTACACCCTGATT
ACCGCCATGACGCCAGGACCGAACAATATTCTCGCCCTTAGCTCTGCTACGTCGCATGGA
TTTCGTCAAAGTACCCGTGTGCTGGCAGGGATGAGTCTGGGATTTTTGATTGTGATGTTA
CTGTGTGCGGGCATTTCATTTTCACTGGCAGTGATTGACCCGGCAGCGGTACACCTTTTG
AGTTGGGCGGGGCGGCATATATTGTCTGGCTGGCGTGGAAAATCGCCACCAGCCCAACAA
AGGAAGACGGACTTCAGACAAAACCAATCAGTTTTTGGGCCAGCTTTGCTTTGCAGTTTG
TGAACGTCAAAATCATTTTGTACGGTGTTACGGCACTGTCAACGTTTGTTCTGCCGCAAA
CACAGGCGCTAAGCTGGGTAGTTGGCGTCAGCGTTTTGCTGGCGATGATTGGGACGTTTG
GCAATGTGTGCTGGGCGCTGGCGGGGCATCTGTTTCAGCGATTGTTTCGCCAGTATGGTC
GCCAGTTAAATATCGTGCTTGCCCTGTTGCTGGTCTATTGCGCGGTACGCATTTTCTATT
AACGAAAAAAGCGGAAGAGGTCGCCCTCTTCCGCTTAGTAACTTGCTACTTAAGCCTTAC
AGGCTTTCAGTAAAGGTACGAGCGATAACGTCGCGCTGCTGTTCCGGAGTCAGAGAGTTA
AAGCGAACTGCATAACCGGATACACGGATGGTCAGCTGCGGATATTTTTCCGGATGCTTA
ACTGCATCTTCCAGAGTTTCACGACGCAGAACGTTAACGTTCAGGTGTTGACCACCTTCA
ACGCGAACTTCTGGTTTCACTTCTACTGGAACTTCACGGTATTCAATGTCACCCAGTTTG
CTTACTGCAACCACTTCGTCTTCTGCAAAACCTGCTTTCGCAACGATGCAACGCGCTTCG
CCTTTTTCGCTGTCCAGCAACCAGAAAGAGTTCAGCAGATCGTCGTTAGCGGCTTTAGTA
ATCTGGATACCTGTAATCATGTGATGCCTCCCCGGCAAAATTATTTGATTTGTTCAGCCT
GTCGCGGCCAATTGGTAAAACCATTGTTGCTTGAGTGTATATATACTCCTCAAACACCCT
TGATTCTTTGATTTAAATCAATAAAAACCACATATCAAGTGTGGTCACAAATGGATTTTA
TTGTTTTACATCAACTTATGCAGATGTGAAATTTTACCAATTTACATTTTTTTGCATGTC
TTTTTGTCTATAAAATGAGCATGATTTTGTTCTGTAGAAAGAAGCAGTTAAGCTAGGCGG
ATTAAAGATTCGCAGGAGAGCGAGATGGCTAACGAATTAACCTGGCATGATGTGCTGGCT
GAAGAGAAGCAGCAACCCTATTTTCTTAATACCCTTCAGACCGTCGCCAGCGAGCGGCAG
TCCGGCGTCACTATCTATCCGCCACAAAAAGATGTCTTTAACGCGTTCCGCTTTACGGAG
TTGGGTGACGTTAAAGTGGTGATTCTCGGTCAGGATCCTTATCACGGACCAGGACAGGCG
CATGGTCTGGCATTTTCCGTTCGCCCCGGCATTGCGACACCACCGTCACTGCTGAATATG
TATAAAGAGCTGGAAAATACTATTCCCGGTTTCACCCGCCCTAATCATGGTTATCTTGAA
AGCTGGGCGCGTCAGGGTGTTCTGCTGCTCAATACTGTCTTGACGGTTCGCGCTGGTCAG
GCGCATTCCCACGCCAGCCTCGGCTGGGAGACGTTTACTGATAAAGTCATCAGCCTCATA
AATCAGCATCGCGAAGGCGTGGTGTTTTTGTTGTGGGGATCACATGCGCAAAAGAAAGGG
GCGATTATAGATAAGCAACGCCATCATGTACTGAAAGCACCGCATCCGTCGCCGCTTTCG
GCGCATCGTGGATTCTTTGGCTGCAACCATTTTGTGCTGGCAAATCAGTGGCTGGAACAA
CGTGGCGAGACGCCGATTGACTGGATGCCAGTATTACCGGCAGAGAGTGAGTAAATTTGC
GGGAAAATGCCGGATGGCAGCGTTGCCACCCGGCTGATTTATCAGGCTTTATTCTGACGC
CACCATTCGCCAAGAAGAACGCCGGTTGCGACAGAGATATTCAGCCCGGCAACGTTGCCA
GTACCATCAATCTTCACGCGCAGATCGTTCGGATCGCGTGCGGCATCCGGTAACCCTTCA
TATTCCTGACCCAGCACCAGTACCATTTTCGCTGGCAGACTGGTTTTGAACAGCGGTTTA
CCCTGCTCGCTGGAAGTTGTCACTACGGTGTAACCCGCCTGACGGAAATCATCCAGCACG
TTAACAATGTTGTCGCCAGTAATCGGCTGAACGTGCTCTGCGCCGCCTTCTGCGGTACGG
ATAGCCGCCCCAGACTCCAGCAGTGCTGCATCCTGCACCACAACACCTTTCACGCCGAAG
TGCGCACAGCTACGCATCATGCCGCCCAGGTTATGCGGGTTAGATTCGTTTTCCAGGGCC
AGTACACAATCCTGCGCGCCTGCCTGGCTTACCCACTGCTGCACGGTTGTACCGTTACGC
TTTTTGATCAGGAAGCAAACGCCGCCGTGATGTTCCGTGCCTGACGCTTTTGTCAGTTCC
GCTTCATCCACCACATGGTACGCTTTGCGGTTTGCTGCCATCCAGCGCAAGGCTTCTTTA
AAACGCGGCGTTACACTCTGGATAAACCAGGCGCGAACAATCGCTTCCGGACGGCTCTGG
AACAGTGCCTGACAGGCATTTTCGCCGTAGACGCGGGTTTCTTCCGCACGCTGACGACGC
AACACTTCCGGATCAATAAAACTTTTACCACTGATGCCACCGTGATCGGCCTTTTCCGGC
GTCTCATCACCCGGCGCGCGGGAAACTGTGCGCCACGGCGACTCTTCCCACTTGCGGTCA
CGGGGCTGACTCTGTTTGTCATCGCGGGCGGGGCGACGGCCACCGTCAGCACGAGATTTT
CCTGGACGCCCGCCCCCTTTCCCGGTACGCGGGTTGTGGGTACGTTTATCAGAATCATCA
TCACTGCGGACATACATCACTTTGACCTTGCCGCTTTTACCTTTCATTTCATCGTTCATG
CTTTTCTCCACCAGCGCTGCGCGAAGCGCGCAGATTACCCGAAGTCCGCGCGGTTCGCCA
TGATTTCGTACCAAAGCCTGCGACTATCATACCTATTGAATAAAACAGATTGTTGTCTGG
AACAATGTCCCCGATAATATGTAACATATTAGAAACATACCGGCGTCGTTGCCGATAAGT
CTCCTTACTCATCCCGAGGTTAGTTATGAATACCGTTTGTACCCATTGTCAGGCCATCAA
TCGCATTCCCGACGATCGGATCGAAGATGCGGCAAAATGCGGACGCTGCGGTCACGACTT
GTTTGACGGAGAGGTGATTAATGCGACCGGTGAAACGCTCGACAAATTGCTGAAAGATGA
TCTACCTGTGGTGATCGACTTCTGGGCACCGTGGTGCGGCCCCTGCCGTAATTTCGCACC
AATTTTTGAAGATGTCGCGCAAGAGCGTAGCGGTAAAGTGCGCTTTGTGAAAGTGAATAC
CGAAGCTGAACGTGAATTGAGCAGTCGCTTTGGAATTCGTAGTATACCGACGATCATGAT
TTTCAAAAACGGTCAGGTTGTCGACATGCTTAATGGCGCAGTACCGAAAGCGCCGTTTGA
TAGCTGGCTGAACGAATCTCTTTAATCTTACCGGGGCGCATCTTGTGCCCCGTTTTCTCC
TCTGCGACAATGGCGTTTTTTCGACGCTCTCTTATGACCGAAAACGCTGTTCTCCAGTTA
CGCGCCGAGCGTATTGCGCGCGCAACACGTCCTTTTCTTGCCCGCGGTAATCGCGTTCGT
CGCTGCCAACGCTGTCTTTTGCCAGAGAAATTATGTCTCTGTTCGACAATTACCCCAGCA
CAAGCAAAAAGTCGCTTCTGTTTGCTGATGTTCGACACCGAGCCAATGAAGCCCAGTAAT
ACCGGGCGTCTGATTGCTGATATTTTGCCTGATACCGTTGCGTTTCAATGGTCGCGAACC
GAACCCTCGCAGGACTTGCTGGAGCTGGTGCAAAACCCGGACTATCAACCAATGGTGGTC
TTTCCCGCCTCGTATGCTGACGAGCAACGGGAAGTGATCTTCACACCACCTGCCGGTAAG
CCACCGCTGTTTATCATGCTCGATGGTACCTGGCCGGAAGCTCGCAAGATGTTTCGTAAA
AGTCCGTATCTGGATAATCTTCCCGTCATTTCCGTCGATCTTTCCCGGCTTTCTGCCTAT
CGCCTGCGTGAAGCCCAGGGTGAAGGCCAATATTGCACCGCCGAAGTAGCCATCGCGCTT
TTAGATATGGCGGGCGATACCGAAGCCGCAACGGGCTTAGGCGAGCATTTCACTCGTTTT
AAAACGCGCTATCTGGCAGGAAAAACGCAACATCTGGGTAGCATCACAGCAGAACAGTTA
GAAAGCGTTTAAAATCATTCGGTCACTTCTGCGGGAGACCGGTATGAGTCAGCGAGGACT
GGAAGCACTATTGCGACCAAAATCGATTGCGGTAATTGGCGCATCGATGAAACCCAATCG
AGCAGGTTACCTGATGATGCGTAACCTGCTGGCGGGAGGCTTTAACGGACCGGTACTCCC
GGTGACGCCTGCCTGGAAAGCGGTGTTGGGTGTGTTGGCCTGGCCGGATATTGCCAGCTT
GCCCTTTACACCCGACCTTGCGGTTTTATGTACCAATGCCAGCCGTAATCTTGCTCTTCT
GGAAGAGCTCGGCGAGAAAGGCTGTAAAACCTGCATTATTCTTTCCGCCCCGGCATCGCA
ACACGAAGATCTCCGCGCCTGCGCCCTGCGCCATAACATGCGCCTGCTTGGACCAAACAG
TCTGGGTTTACTGGCTCCCTGGCAAGGTCTGAATGCCAGCTTTTCGCCTGTGCCGATTAA
ACGCGGCAAGCTGGCGTTTATTTCGCAATCGGCTGCCGTCTCCAACACCATCCTCGACTG
GGCGCAACAGCGTGAGATGGGCTTTTCCTACTTTATTGCGCTCGGCGACAGCCTGGATAT
CGACGTTGATGAATTGCTCGACTATCTGGCCCGCGACAGTAAAACCAGCGCCATCCTGCT
CTATCTCGAACAGTTAAGCGACGCGCGACGCTTTGTTTCGGCGGCCCGTAGTGCCTCTCG
CAACAAACCGATTCTGGTGATTAAAAGCGGACGTAGCCCGGCGGCTCAACGTCTGTTGAA
CACCACGGCAGGAATGGATCCGGCGTGGGATGCGGCTATTCAGCGTGCCGGTTTGTTGCG
GGTACAGGATACTCACGAGCTGTTTTCGGCGGTGGAAACCCTCAGCCATATGCGCCCGCT
GCGTGGCGACCGGCTGATGATTATCAGCAACGGTGCTGCGCCTGCCGCGCTGGCGCTGGA
TGCCTTATGGTCACGCAATGGCAAGCTGGCAACGCTAAGCGAAGAAACCTGCCAGAAACT
GCGCGATGCACTGCCAGAACATGTGGCAATCTCTAACCCGCTCGATCTACGCGATGACGC
CAGCAGTGAGCACTATATTAAAACGCTGGATATTCTGCTCCACAGCCAGGATTTTGACGC
GCTGATGGTTATTCATTCGCCCAGCGCCGCTGCTCCCGCAACAGAAAGTGCGCAAGCATT
AATTGAAGCGGTAAAGCATCATCCCCGCAGCAAGTATGTTTCTCTGCTGACGAACTGGTG
CGGCGAACACTCCTCGCAAGAGGCACGACGATTATTCAGTGAAGCCGGGCTGCCGACCTA
TCGCACGCCGGAAGGAACCATCACTGCTTTTATGCATATGGTGGAGTACCGACGTAATCA
GAAGCAACTACGCGAAACGCCGGCGTTGCCCAGCAATCTGACCTCCAATACCGCAGAAGC
GCATCTTCTGTTGCAACAGGCGATTGCCGAAGGGGCTACGTCGCTCGATACCCATGAAGT
TCAGCCCATCCTGCAAGCGTATGGCATGAACACGCTCCCCACCTGGATTGCCAGCGATAG
CACCGAAGCGGTGCATATTGCCGAACAGATTGGTTATCCGGTGGCGCTGAAATTGCGTTC
GCCGGATATTCCACATAAATCGGAAGTTCAGGGCGTAATGCTCTACCTGCGTACAGCTAA
TGAAGTCCAGCAAGCGGCAAACGCCATTTTCGATCGCGTAAAAATGGCCTGGCCGCAGGC
GCGGATCCACGGCCTGTTGGTGCAAAGTATGGCTAACCGTGCTGGCGCTCAGGAGTTGCG
GGTTGTGGTTGAGCACGATCCGGTTTTCGGGCCGTTGATCATGCTGGGCGAAGGCGGTGT
GGAGTGGCGTCCTGAAGATCAAGCCGTCGTCGCACTACCGCCGCTGAACATGAACCTGGC
CCGCTATCTGGTTATTCAGGGGATCAAAAGTAAAAAGATTCGTGCGCGCAGTGCGCTACG
CCCATTAGATGTTGCAGGCTTGAGCCAGCTTCTGGTGCAGGTTTCTAACTTGATTGTCGA
TTGCCCGGAAATTCAGCGTCTGGATATTCATCCTTTGCTGGCTTCTGGCAGTGAATTTAC
CGCGCTGGATGTCACGCTGGATATCGCGCCGTTTGAAGGCGATAACGAGAGTCGGCTGGC
AGTGCGCCCTTATCCGCATCAGCTGGAAGAATGGGTAGAATTGAAAAACGGTGAACACTG
CTTGTTCCGCCCGATTTTGCCAGAAGATGAGCCACAGCTTCAGCAATTCATTTCGCGAGT
CACCAAAGAAGATCTTTATTATCGCTACTTTAGCGAGATCAACGAATTTACCCATGAAGA
TTTAGCCAACATGACGCAGATCGACTACGATCGGGAAATGGCTTTTGTGGCGGTACGACG
TATTGATCAAACAGAAGAGATCCTCGGCGTCACGCGTGCGATCTCCGACCCTGATAACAT
CGATGCCGAATTTGCCGTGCTGGTTCGCTCGGATCTCAAAGGGTTAGGCTTAGGTCGACG
CTTAATGGAAAAGTTGATTACCTATACGCGAGATCACGGACTACAACGTCTGAATGGTAT
TACGATGCCAAACAATCGTGGCATGGTGGCGCTGGCCCGCAAGCTCGGGTTTAACGTTGA
TATCCAGCTCGAAGAGGGGATCGTTGGGCTTACGCTAAATCTTGCCCAGCGCGAGGAATC
ATGAGTAAGGTACTGGAAATGTTGACCACTTAATCGGGACTGGTGTTATTATTGCCCGCT
TATGTCGTCTGCATTGCACAGAGGACCCTTCAATGAACAGAGAAGAAATGCACTGTGATG
TTGTCAAAATTTAAGCGTAATAAACATCAACAACACCTTGCCCAACTACCCAAGATTTCT
CAATCAGTTGATGATGTCGATTTCTTTTACGCTCCCGCCGACTTCCGGGAGACGCTGCTG
GAAAAAATAGCCAGCGCGAAGCAGCGCATTTGCATTGTCGCCCTGTATCTCGAACAGGAT
GACGGTGGCAAAGGCATTCTGAACGCGTTGTATGAGGCTAAAAGGCAGCGTCCGGAACTG
GATGTGCGGGTGCTGGTCGACTGGCATCGTGCACAACGTGGACGCATTGGCGCTGCGGCA
TCTAACACTAACGCTGACTGGTACTGCCGCATGGCGCAGGAAAATCCGGGCGTAGATGTT
CCGGTTTATGGCGTTCCAATCAATACCCGTGAAGCCCTTGGTGTTCTGCACTTTAAAGGC
TTTATCATCGACGATAGCGTACTTTATAGCGGTGCCAGCCTGAACGATGTTTACCTGCAT
CAGCACGATAAATATCGCTACGACCGTTATCATCTGATCCGTAACCGTAAGATGTCAGAC
ATTATGTTTGAATGGGTTACACAGAATATTATGAATGGCCGCGGCGTTAATCGTCTGGAT
GATGTTAATCGGCCAAAAAGCCCGGAAATCAAGAACGACATTCGCCTGTTCCGCCAGGAG
CTGCGTGATGCCGCTTATCATTTCCAGGGCGATGCCGACAACGATCAGCTTTCCGTAACG
CCGCTAGTGGGGCTGGGGAAATCGAGTCTGTTGAACAAGACCATTTTCCATCTTATGCCT
TGTGCCGAGCAGAAACTAACCATCTGTACGCCATACTTCAACCTGCCAGCAATCCTTGTG
CGCAATATTATCCAGTTGCTGCGCGAAGGGAAAAAGGTCGAAATTATTGTTGGTGATAAA
ACCGCGAACGACTTCTACATTCCGGAAGATGAACCTTTCAAGATAATTGGCGCATTGCCT
TATCTCTATGAGATCAATCTGCGTCGTTTCCTGAGCCGTTTGCAGTATTACGTCAATACT
GACCAGCTAGTGGTTCGGTTATGGAAAGATGACGACAACACCTATCACCTAAAAGGGATG
TGGGTTGATGATAAGTGGATGTTGATCACCGGTAATAACCTGAACCCGCGCGCCTGGCGT
CTGGATCTGGAAAACGCCATTTTGATCCACGATCCACAACTGGAGCTTGCGCCGCAGCGA
GAGAAAGAACTGGAGCTGATCCGCGAGCATACCACCATCGTTAAGCACTATCGCGATCTG
CAAAGTATTGCCGATTATCCGGTGAAGGTTCGTAAACTCATCCGCCGTCTGCGCCGTATC
CGCATCGACCGATTAATTAGCCGCATCCTGTAATCACAACCCCGTCCTGTACGGGGTTTG
TTTTTTGGAGGCCACGTTTTGCGTATTCTTTTTGTCTGTTCGCTATTATTACTTTCTGGA
TGCAGCCATATGGCTAACGATAGCTGGAGCGGGCAGGATAAAGCTCAACACTTTATCGCC
TCGGCGATGCTTTCCGCCGCCGGAAATGAATATTCACAGCATCAGGGGATGAGCCGGGAT
CGCAGTGCCATGTTCGGATTAATGTTCTCTGTCAGTTTGGGGGCGTCAAAAGAGCTTTGG
GATAGCCGCCCCGAAGGGAGCGGCTGGAGCTGGAGGGATTTGGCCTGGGATGTCGCCGGT
GCAAGCACCGGCTATACCGTCTGGCAACTGACCCGTCACTAAAGACGCATCCCCTTCCCT
TTGCGATGTAGCATCAAAGAAACCAGAAACGCCACCACGGCCATCAAGGTCACATACCAG
AAGAAGGCTGTTTCCATTCCTATTGATTTCAGCGACAACGCTACGTACTCCGCCGAACCA
CCAAATATAGCATTAGCGACCGCATATGACAGACCAACGCCTAATGCGCGAACCTGTGCC
GGGAACATCTCAGCCTTCAGTATTCCACTGATTGAAGTATAAAAACTCACGATCAGCAGG
GCGCACATCACCAGACCAAAAGCGGCATAAGGCGAGGAAACGTTCTGCAATGCTGAGAGA
ATAGGAACGGTAAAAATGGCTGCCAGAGAACCGAAACATAACATTGAGGTACGACGACCA
ATCTTATCCGACAGCGCGCCAATAAGTGGTTGAATAAGCATGAATACAAACAATGCGGCA
GTCATAATGCCACTCGCCACGTTGGCATGCATTCCCGCAGTATTTACCAGATACTTCTGC
ATATAAGTGGTGAAGGTATAGAAACAAAGGGAGCCCGCAGCGGTAAAACCGAGAACCATG
ATGAATGCACGGCGATTGCGCCATAATCCTTTCAGAGATCCAGCTTCTTTTAAAGCGCGT
GTTTCTTGTTGTGAAGTTTCATCTAACTGACGACGTAACCACAACGCCACAACAGCTAAC
ACAGCCCCTAACGCGAAAGGAATACGCCATCCCCACTCTCTGAGTACAGCGTCTTCCATG
GTGTGTTGTAAAACCACGACAACCAGTAGAGCTAGCAGTTGCCCGCCGATCAACGTCACA
TACTGAAATGATGCGTAAAAACCTTTGCGCCCTTCAACGGCAACTTCACTCATATAGGTG
GCGCTGGTGCCATATTCTCCGCCAACGGATAATCCCTGGAATAAACGCGCGAGAAGCAAT
AATGCCGGAGCCCAGGTACCGATTGTTTCGTAGCCTGGCAAACAGGCGATAACCAGTGAG
CCGAAACACATCATACACACCGATAACAACATCGATTTTTTGCGACCATGTTTATCGGCT
ATGCGGCCAAATAGCCAACCGCCTATTGGGCGCATCAGAAATCCTGCAGCAAAAACACCT
GCTGTTTGCAGTAGTTGAGTCGTCGTGTTCCCGGAAGGGAAGAAGATGTGGGCGAAGTAG
AGTGAACAGAACGAGTAGACATAGAAATCGAACCACTCGACCAGATTACCTGAAGAGGCC
CCAACAATTGCCCAAATGCGGCGACGAGTATCACTACTTGTCAGTTTGCTGTCTGCCGTT
ACAGTACTTTCAGCCATGCCATTATGTCTCCTGCCGTAATCCGATGCTTTTGTCGGTCGC
TTTTGTTCATTTTTTTGGTAAAGAAAATGTTATACATTTGTTGCGTATCATTATGCAACC
TTAACCATGAATTTAGTTAGCAGGAAAATGGTTATTAAGGAGCTTAAGGATAGATTTCTG
GTAAGGAGGAAGTATGGAAGTGGGCAATTTGGGGAAGACGTATTCGCTGGCGTATGTGGA
GGAATAAGCTGCCTCTACCGTGCTTGCGTAGGCCGATGTGATGGACACCTCCCGCCTTAC
GGCATCAATGTGCCAGACTGAGGCGTACCCAGTTCCCAGGTGGAGGTGTCCGTCATGAAT
ATTAAGCGTATTGGTCTCGATCTTGCAAAAACGTTTTTCAGATCCACGGCGTTGATCACC
ATGAAAAAGTGGTACTGCGAAAAAGGCTGCGCCGTCCCCACATGATGACGTTTTTCTCCG
GGCTTTCTCCCTGCCTCATCGGCATCGAAGCCTGTGGCTCTTCTCATTACTGGGCCCGCG
AGCTCACCCGTATGGGCCATACCGTGCGCATTATTCCACCGAAACTTGTCAAACCTTATC
TCAAAGGTAACAAAAACGACGCCAATGATACAGCCGCCATCTGTGGGGCCATCAGCAGGC
CCGGCATGCGATTTGTTGCCCTCAAATCGGAAGCCCAGCAGACGCTGCAGGCAGAGCACC
GGGTCCGGGTCCGGGTCCGGGTCCGGGTCCGGGTCCGGGTCCGGGTCCGGGTCCGGGTCC
GGGTCCGGGTCCGGGTCCGGGTCCGGGTCCGGGTCCGGGTCCGGGCAAGAATCATCCGCG
AGCGAACGGCACTGTGCAATGAAATCCGGGGGCTGTTAAGTGAGTTTGGTCTGGTGCTGC
CCGTGGGGATAAGGCATGTGCGTAAAATCCTGCCGGAAATCCTGTCACAACAGGAGCAGT
GGAATGACCGCTTCATCCGTTTGTTGTGCGAACTGTCAGAGGAAATGCAGATGCTAGATG
AACGCATATCGCGTTATGACCGCCGTCCTCATGAGGCTGCAAGGGATGATATCCGTATTA
AACGGCTGATGGAAATAGAGAGTTTTGGCCCGATAGTAGCGAGCGCTTTGTAGCCGCCGT
AGGGGATGCGAAGCAATTTAAAAACGGGTGGGAAATGTCAGCCTTTATTGGGCTGGTTCC
GCGACAGCATTCCAGCGGCGGAAAAGAGCGGTTGGGTCATATAAGCAAACGGGGCGACAG
TTACCAGAGAACGCTGATAATCCACGGTCCCCCCGCAGTACTGAGATTCAGCGCCGGAAA
AACAGACAGGCGCAGTCGCTGGCTACAGTCGGTGGCAGAAAGACGCAATAACAATATTGC
CGTGGTGGCGCTGGCAAATAAAAACATCAGGATAGCGTAGGCGATATTAAATCGTGGTGA
AGAGTACTGTGGGGTGCCGAATGCGGCGTAAACAGCACTGACCACCTTGTAAGTAAACGA
GTAATAAACCTGCCGTAAGCGTACAAAGTTATAAAAAACTGATGTGTAACAGGTAAGACC
GACATCTGATAAATCCGACCTTATCCATGGCTCCCTGTAAAGCAAAGCCGGCAGGCCGAA
AGGAAACAGATGCGCAGATAACATCATGGCCGGGAACGACGGTACCGTAAGAGAGGCCGG
ATATACGAATGCAACTTACTCCCGTTACACAGATGAAAAATAACTTGCGCAACGGGAGTT
GTCCATATATGGATAAGACGTGCCAGCGTCGCATCCGGCATTTATTCCGCACCAACGCAA
AAAAGCCCAGTCTTCCGACTGGGCCTTTCGCTAAATTTGATGCCTGGCAGTTCCCTACTC
TCGCATGGGGAGACCCCACACTACCATCGGCGCTACGGCGTTTCACTTCTGAGTTCGGCA
TGGGGTCAGGTGGGACCACCGCGCTAAGGCCGCCAGGCAAATTCTGTTTTATCAACACGT
CACGTTATGACCTGTCGATTTAATCTGTATCAGGCTGAAAATCTTCTCTCAATCCGCCAA
AACATCTTCGGCGTTGTAAGGTTAAGCCTCACGGTTCATTAGTACCGGTTAGCTCAACGC
ATCGCTGCGCTTACACACCCGGCCTATCAACGTCGTCGTCTTCAACGTTCCTTCAGGACC
CTTAAAGGGTCAGGGAGAACTCATCTCGGGGCAAGTTTCGTGCTTAGATGCTTTCAGCAC
TTATCTCTTCCGCATTTAGCTACCGGGCAGTGCCATTGGCATGACAACCCGAACACCAGT
GATGCGTCCACTCCGGTCCTCTCGTACTAGGAGCAGCCCCCTCAGTTCTCCAGCGCCCAC
GGCAGATAGGGACCGAACTGTCTCACGACGTTCTAAACCCAGCTCGCGTACCACTTTAAA
TGGCGAACAGCCATACCCTTGGGACCTACTTCAGCCCCAGGATGTGATGAGCCGACATCG
AGGTGCCAAACACCGCCGTCGATATGAACTCTTGGGCGGTATCAGCCTGTTATCCCCGGA
GTACCTTTTATCCGTTGAGCGATGGCCCTTCCATTCAGAACCACCGGATCACTATGACCT
GCTTTCGCACCTGCTCGCGCCGTCACGCTCGCAGTCAAGCTGGCTTATGCCATTGCACTA
ACCTCCTGATGTCCGACCAGGATTAGCCAACCTTCGTGCTCCTCCGTTACTCTTTAGGAG
GAGACCGCCCCAGTCAAACTACCCACCAGACACTGTCCGCAACCCCGGTAAGGGGCCCAC
GTTAGAACATCAAACATTAAAGGGTGGTATTTCAAGGCCGGCTCCATGCAGACTGGCGTC
CACACTTCAAAGCCTCCCACCTATCCTACACATCAAGGCTCAATGTTCAGTGTCAAGCTA
TAGTAAAGGTTCACGGGGTCTTTCCGTCTTGCCGCGGGTACACTGCATCTTCACAGCGAG
TTCAATTTCACTGAGTCTCGGGTGGAGACAGCCTGGCCATCATTACGCCATTCGTGCAGG
TCGGAACTTACCCGACAAGGAATTTCGCTACCTTAGGACCGTTATAGTTACGGCCGCCGT
TTACCGGGGCTTCGATCAAGAGCTTCGCGTTACCGCTAACCCCATCAATTAACCTTCCGG
CACCGGGCAGGCGTCACACCGTATACGTCCACTTTCGTGTTTGCACAGTGCTGTGTTTTT
AATAAACAGTTGCAGCCAGCTGGTATCTTCGACTGATTTCAGCTCCACGAGCAAGTCGCT
TCACCTACATATCAGCGTGCCTTCTCCCGAAGTTACGGCACCATTTTGCCTAGTTCCTTC
ACCCGAGTTCTCTCAAGCGCCTTGGTATTCTCTACCTGACCACCTGTGTCGGTTTGGGGT
ACGATTTGATGTTACCTGATGCTTAGAGGCTTTTCCTGGAAGCAGGGCATTTGTCGCTTC
AGCACCGTAGTGCCTCGTCATCACGCCTCAGCCTTGGTTTTCCGGATTTGCCTGGAAAAC
CAGCCTACACGCTTAAACCGGGACAACCGTCGCCCGGCCAACATAGCCTTCTCCGTCCCC
CCTTCGCAGTAACACCAAGTACAGGAATATTAACCTGTTTCCCATCGACTACGCCTTTCG
GCCTCGCCTTAGGGGTCGACTCACCCTGCCCCGATTAACGTTGGACAGGAACCCTTGGTC
TTCCGGCGAGCGGGCTTTTCACCCGCTTTATCGTTACTTATGTCAGCATTCGCACTTCTG
ATACCTCCAGCAACCCTCACAGGCCACCTTCACAGGCTTACAGAACGCTCCCCTACCCAA
CAACACATAGTGTCGCTGCCGCAGCTTCGGTGCATGGTTTAGCCCCGTTACATCTTCCGC
GCAGGCCGACTCGACCAGTGAGCTATTACGCTTTCTTTAAATGATGGCTGCTTCTAAGCC
AACATCCTGGCTGTCTGGGCCTTCCCACATCGTTTCCCACTTAACCATGACTTTGGGACC
TTAGCTGGCGGTCTGGGTTGTTTCCCTCTTCACGACGGACGTTAGCACCCGCCGTGTGTC
TCCCATGATAACATTCTCCGGTATTCGCAGTTTGCATCGGGTTGGTAAGTCGGGATGACC
CCCTTGCCGAAACAGTGCTCTACCCCCGGAGATGAATTCACGAGGCGCTACCTAAATAGC
TTTCGGGGAGAACCAGCTATCTCCCGGTTTGATTGGCCTTTCACCCCCAGCCACAAGTCA
TCCGCTAATTTTTCAACATTAGTCGGTTCGGTCCTCCAGTTAGTGTTACCCAACCTTCAA
CCTGCCCATGGCTAGATCACCGGGTTTCGGGTCTATACCCTGCAACTTAACGCCCAGTTA
AGACTCGGTTTCCCTTCGGCTCCCCTATTCGGTTAACCTTGCTACAGAATATAAGTCGCT
GACCCATTATACAAAAGGTACGCAGTCACCCCATTAAGAGGCTCCCACTGCTTGTACGTA
CACGGTTTCAGGTTCTTTTTCACTCCCCTCGCCGGGGTTCTTTTCGCCTTTCCCTCACGG
TACTGGTTCACTATCGGTCAGTCAGGAGTATTTAGCCTTGGAGGATGGTCCCCCCATATT
CAGACAGGATACCACGTGTCCCGCCCTACTCATCGAGCTCACAATATGTGCATTTTTGTG
TACGGGGCTGTCACCCTGTATCGCGCGCCTTTCCAGACGCTTCCACTAACACACACACTG
ATTCAGGCTCTGGGCTCCTCCCCGTTCGCTCGCCGCTACTGGGGGAATCTCGGTTGATTT
CTTTTCCTCGGGGTACTTAGATGTTTCAGTTCCCCCGGTTCGCCTCATTAACCTATGGAT
TCAGTTAATGATAGTGTGTCGAAACACACTGGGTTTCCCCATTCGGAAATCGCCGGTTAT
AACGGTTCATATCACCTCACCGACGCTTATCGCAGATTAGCACGTCCTTCATCGCCTCTG
ACTGCCAGGGCATCCACCGTGTACGCTTAGTCGCTTAACCTCACAACCCGAAGATGTTTC
TTGCGATTCATCATCGTGCTGCGAAAATTTGAGAGACTCACGAACAACTCTCGTTGTTCA
GTGTTTCAATTTTCAGCTTGATCCAGATTTTTAAAGAGCAAATATCTCAAACATCACCCG
AAGATGAGTTTTGAGATATTAAGGCAGGTGACTTTCACTCACAAACCAGCAAGTGGCGTC
CCCTAGGGGATTCGAACCCCTGTTACCGCCGTGAAAGGGCGGTGTCCTGGGCCTCTAGAC
GAAGGGGACGTATCAGTCTGCTTCGCAAGACGCCTTGCTTTTCACTTTCTATCAGACAAT
CTGTGTGAGCACTGCAAAGTACGCTTCTTTAAGGTAAGGAGGTGATCCAACCGCAGGTTC
CCCTACGGTTACCTTGTTACGACTTCACCCCAGTCATGAATCACAAAGTGGTAAGCGCCC
TCCCGAAGGTTAAGCTACCTACTTCTTTTGCAACCCACTCCCATGGTGTGACGGGCGGTG
TGTACAAGGCCCGGGAACGTATTCACCGTGGCATTCTGATCCACGATTACTAGCGATTCC
GACTTCATGGAGTCGAGTTGCAGACTCCAATCCGGACTACGACGCACTTTATGAGGTCCG
CTTGCTCTCGCGAGGTCGCTTCTCTTTGTATGCGCCATTGTAGCACGTGTGTAGCCCTGG
TCGTAAGGGCCATGATGACTTGACGTCATCCCCACCTTCCTCCAGTTTATCACTGGCAGT
CTCCTTTGAGTTCCCGGCCGGACCGCTGGCAACAAAGGATAAGGGTTGCGCTCGTTGCGG
GACTTAACCCAACATTTCACAACACGAGCTGACGACAGCCATGCAGCACCTGTCTCACGG
TTCCCGAAGGCACATTCTCATCTCTGAAAACTTCCGTGGATGTCAAGACCAGGTAAGGTT
CTTCGCGTTGCATCGAATTAAACCACATGCTCCACCGCTTGTGCGGGCCCCCGTCAATTC
ATTTGAGTTTTAACCTTGCGGCCGTACTCCCCAGGCGGTCGACTTAACGCGTTAGCTCCG
GAAGCCACGCCTCAAGGGCACAACCTCCAAGTCGACATCGTTTACGGCGTGGACTACCAG
GGTATCTAATCCTGTTTGCTCCCCACGCTTTCGCACCTGAGCGTCAGTCTTCGTCCAGGG
GGCCGCCTTCGCCACCGGTATTCCTCCAGATCTCTACGCATTTCACCGCTACACCTGGAA
TTCTACCCCCTCTACGAGACTCAAGCTTGCCAGTATCAGATGCAGTTCCCAGGTTGAGCC
CGGGGATTTCACATCTGACTTAACAAACCGCCTGCGTGCGCTTTACGCCCAGTAATTCCG
ATTAACGCTTGCACCCTCCGTATTACCGCGGCTGCTGGCACGGAGTTAGCCGGTGCTTCT
TCTGCGGGTAACGTCAATGAGCAAAGGTATTAACTTTACTCCCTTCCTCCCCGCTGAAAG
TACTTTACAACCCGAAGGCCTTCTTCATACACGCGGCATGGCTGCATCAGGCTTGCGCCC
ATTGTGCAATATTCCCCACTGCTGCCTCCCGTAGGAGTCTGGACCGTGTCTCAGTTCCAG
TGTGGCTGGTCATCCTCTCAGACCAGCTAGGGATCGTCGCCTAGGTGAGCCGTTACCCCA
CCTACTAGCTAATCCCATCTGGGCACATCCGATGGCAAGAGGCCCGAAGGTCCCCCTCTT
TGGTCTTGCGACGTTATGCGGTATTAGCTACCGTTTCCAGTAGTTATCCCCCTCCATCAG
GCAGTTTCCCAGACATTACTCACCCGTCCGCCACTCGTCAGCGAAACAGCAAGCTGTTTC
CTGTTACCGTTCGACTTGCATGTGTTAGGCCTGCCGCCAGCGTTCAATCTGAGCCATGAT
CAAACTCTTCAATTTAAAAGTTTGATGCTCAAAGAATTAAACTTCGTAATGAATTACGTG
TTCACTCCTGAGACTTGGTATTCATTTTTCGTCTTGCGACGTTAAGAATCTGTATCTTCG
AGCGCCCACACAGATTGTCTGATAAATTGTTAAAGAGCAGTGCCGCTTCGCTTTTTCTCA
GCGGCGCGGGGTGTACATAATACACTTTCCCGCTACAGAGTCAAGCATTTTTTTGCTTTT
CTCTGTTGAGATTCTCAGGAGAACCCCGCTGACCCGGCGGCGTGCTTGCCGTTGTTCCGT
GTCAGTGGTGGCGCATTATAGGGAGTTATTCCGGCCTGACAAGCGAAAAATATAAAAACT
TTATCGTTCGCTCATTTTTCAGGCAAAATATCTTAAATATAGTCTTTCCCGTCTAACTTA
TAGACAAAAACGAGCCCCAAAGGGCTCGTTTTATCATTACTGGACGGCGACAATCCGGTC
TTCATTAACTTCCAGGCGAATAACTTTACCCGGAACCAATTCACCTGACAGTATTTGCTG
TGCCAACGGGTTTTCGATCTGCTGCTGGATAGCACGTTTCAGAGGACGTGCACCATAGAC
CGGATCGTAACCGTTCTCGCTCAGCAGTTTCAGCGCCTCGTCAGAAATGTGGATTTCATA
ACCACGTTCTTCCAGACGTTTGTACAGACGTTTCAACTGAATCTGCGCAATCGACGCAAT
GTGCTGTTCACCCAGCGGATGGAAGACCACCACTTCATCGATACGGTTAATGAATTCCGG
ACGGAAGTTATGGCTTACCACACCGAGCACCAGCTCTTTCATGTGCGCATAATCCAGTTC
ACCGAAGCGTTCCTGAATCAAATCGGAACCGAGGTTAGAGGTCATAATGACAACCGTATT
ACGGAAGTCGACCGTTCTCCCCTGTCCGTCAGTCAGACGCCCATCATCCAGTACCTGCAA
CAGAATGTTGAAGACATCCGGATGCGCTTTTTCAACTTCATCCAGCAGAATGACGGAATA
CGGACGACGACGCACCGCTTCGGTCAGGTAGCCACCTTCTTCATAACCGACATATCCCGG
AGGCGCACCAACCAGACGAGACACCGAGTGTTTCTCCATAAACTCGGACATATCGATACG
GACCATCGCCTCGTCGCTATCAAACATAAAGTTCGCTAGCGCCTTACAAAGCTCAGTTTT
CCCCACACCGGTTGGGCCGAGGAACAGGAATGAACCAATCGGGCGATTTGGATCCGCCAG
CCCCGCACGGCTACGACGAATAGCGTTAGATACCGCATCAACCGCTTCGTTCTGACCAAT
AACGCGATGGTGCAGTTCTTGCTCCATACGCAGCAGTTTTTCGCGCTCGCTTTCCATCAT
GCGAGAAACCGGAATCCCCGTCCAACGCGCCAGCACTTCAGCAATTTCGGCATCGGTCAC
TTTATTACGCAACAGACGCATAGTTTTGCCTTCGAGCTGCGTTGCGGCTTCCAGTTGCTT
TTCCAGTTCCGGGATTTTGCCGTATTGCAGTTCAGACATCCGCGCCAGGTCCCCCACACG
GCGAGCCTGTTCAATAGCGATTTTCGCCTGTTCCAGTTCCGCTTTAATGGTCTGTGTACC
AGAAAGCGATGCTTTCTCTGCTTTCCACTCTTCTTCTAACTCGGAGTACTGACGTTCTTT
GTCGCTCAGTTCTTCGTTGAGCATATCCAGGCGTTTTTTACTGGCTTCATCAGACTCTTT
CATTAACGCCTGTTGTTCCAGTTTAAGCTGGATGATACGGCGATCGAGTCGGTCGAGTTC
TTCTGGTTTTGAGTCAATCTGCATACGAATGCTGGATGCTGCTTCATCGATCAGGTCGAT
GGCTTTATCCGGCAGCTGACGGTCAGCAATGTAGCGATGAGACAACGTCGCCGCTGCAAC
AATTGCCGGGTCAGTAATTTGCACATGGTGGTGCAACTCATAACGTTCTTTCAGGCCACG
CAGAATAGCAATGGTATCTTCAACAGAAGGCTCGGCAACAAACACTTTCTGGAAACGACG
TTCCAGCGCAGCATCTTTTTCGATGTACTGGCGATATTCGTCAAGCGTCGTGGCACCTAC
GCAGTGCAATTCACCACGCGCCAGTGCCGGTTTCAGCATGTTTCCGGCGTCCATTGCGCC
ATCGGCTTTACCCGCGCCGACCATGGTATGTAATTCGTCGATAAACAGGATGACGTTGCC
TTCCTGTTTGGCAAGATCGTTAAGTACGCCTTTTAAACGTTCTTCAAACTCACCGCGATA
TTTCGCCCCAGCCACCAGCGCGCCCATATCCAGCGCCAGTACGCGGCGGCCTTTCAACCC
TTCGGGCACTTCGCCGTTGATAATACGCTGCGCCAGACCTTCAACGATGGCAGTTTTACC
GACGCCGGGTTCACCAATCAATACCGGGTTATTTTTAGTACGACGTTGCAGCACCTGAAT
GGTACGGCGAATTTCTTCATCACGACCAATCACCGGATCAAGTTTGCCTTGTTCGGCTCG
TTCGGTAAGGTCGATGGTATATTTTTTCAAAGCCTGACGTTGGTCTTCAGCACCCTGATC
GTTCACGCTTTCACCTCCACGCATTTGTTCAATCGCTTGAGTAATGTTGGCGGTGGTCGC
CCCTGCTGCTTTCAGGATGTCGGCCAGTGTGCCGCGAGACTCAAGTGCCGCCAGAACGAA
CAGTTCTGACGAGATAAAGTTATCACCACGTTTTTGCGCCAGCTTGTCGCAAAGATTAAG
AACGCGCACCAGATCCTGTGATGGCTGGACATCACCACCAGTACCTTCAACCTGTGGTAA
ACGATTTAATGCCTGATTGATATCTGTGCGCAACTGGCCAGCATTAATGCCAGCGGATGT
TAATAAAGGACTAACCGAACCCCCTTCCTGATTCAGCAGGGCGCTCATTAAATGAAGTGG
TTCGATGAATTGGTTGTCGTGCCCGAGTGCAAGTGATTGGGCATCGGCAAGAGCAAGCTG
GAATTTATTAGTAAGACGATCCAGACGCATAACTCCTCCCATAACGGATCAAAGTTGCTA
CTGGAGATTAAATGAGGTCATCCCTCAATTATTCAAGGTTATTGACCAGATTAATGTGAA
AAGAAAATCACGCGTACCGGATCGTCTTGATTCTTTAGGTTATATCAGCCAAATGAAACT
TGCCATACGACCGGTGGTCTTGTCGCGACGATAAGAGAAGAAAGTCTCATTTTCCGTATA
TGTACAACGGTCACCGCCAAAAATTTGTTCAACACCAACGCTCGCCAGACGCTGCCGGGC
AAGCTGATAAATATCCGCCAGATACTTATCACCATGCTGAATGAAAGCTGTACTCGCTTT
GGCATCTACTGCCATAAACGCCTCGCGAACCTCCGCCCCCACTTCAAACGCGCGTGGACC
AATTGCCGGCCCTAACCAGGCGAGAATATTTTCCGGATTATCAGCAAAACAGGAAACCGT
CTCTTCCAACACGCCTGCGCACAGTCCACGCCAGCCTGCATGAGCGGCGGCGACCTCCGT
TCCCGCACGATTGCAAAACAGCACGGGCAGGCAGTCGGCAGTCATCACTGCGCAAACCGT
GCCAGGCGTATTGCTATAAGAGGCATCTGCTCGTTTTGAGGCATAAGGTTCGCCAATAAG
CTTAAGCACATCTTTGCCGTGTACCTGCTCAAGCCAGACCGGTTTAGAAGGCAAATTGCC
CGCAGCAAAAAGTCGCTTGCGATTCTCCTCAACGTGATCCGGGTTATCACCACAATGAGC
GCCAAGGTTGAGAGAGTCGTAAGGCGGCAAGCTCACGCCGCCGATACGGGTAGAGCTACA
GGCCGCAACACCTTTTGGCAGCGGCCACTGCGGGACAATCAGCTTACTCATAACCAGTCC
ACTTCATCCTTATGCTCTTCGAAATCGGCGCGCATCTCCTCAATCAGCTCCACCATATCT
TGTGGAATAGGCGCATGCCATTCCATTTCGATGCCGGAGATCGGATGATAAAGACGCAGC
ATGGTTGCATGAAGCGCCTGACGGTCAAACTTACGTAGCGTGGAGATAAACGCTTCCGAA
GCACCTTTTGGCGGACGCGGACGTCCACCATAAACCGGATCGCCCACCAGCGGATGAGTG
ATATGGGCCATATGCACGCGGATCTGGTGCGTACGTCCAGTTTCCAGACGCAACCGCAGA
CGCGTGTGCACACGGAAGTGTTCCATGATGCGATAGTGAGTGACCGCCGGTTTACCCATC
GGATGCACCGCCATGTGAGTACGTTTGGTCGGGTGGCGGCTGATTGGTTCATCTACTGTA
CCGCCAGCGGTCATATGACCAATTGCCACCGCTTCATACTCACGTGTAATTTCACGCCGT
TGCAAAGATTCGACTAAACGCGTCTGAGCCGGAACGGTTTTTGCCACAACCATCAGGCCG
GTGGTGTCTTTATCCAGACGATGGACGATGCCCGCACGCGGTACATCGGCAATGGGCGGA
TAGTAATGAAGCAACGCATTCAGTACCGTACCATCCGGGTTACCCGCGCCAGGATGTACC
ACCAGGTCGCGTGGTTTATTAATGACGATGATATCTTCATCTTCATAGACGATATCCAGC
GGGATATCCTGCGGTTCAAAACGCGCTTCTTCTTCAATCTCAGCGTTGATGGCCACCTGC
TCGCCACCCAATACTTTTTCTTTCGGCTTATCACAAACTTTGCCGTTAACCAGCACGCGC
TGGTCGAGGATCCATTCTTTTATTCGCGAACGTGAATAATCCGGGAACATTTCGGCCAAA
GCCTGATCTAAGCGTTGACCGAGTTGGTTTTCGGACACCGTTGCAGTGAGCTGTACTCGT
TGTGCCATATATACTGCTTCTTCGTTTATCGTTGGGGTTTTACGGCTTTGCCGTTTAATA
TAGTGTGCTATTGTAGCTGGTCTTAACCGGGAGCAGGAACAGAGAATCTCCCGTATTACA
TTTTGAGGAAAGTCAAAACGTCATGACGCGCATGAAATATCTGGTGGCAGCCGCCACGCT
AAGCCTGTTTTTGGCGGGTTGCTCGGGGTCAAAGGAAGAAGTACCTGATAATCCGCCAAA
TGAAATTTACGCGACTGCACAACAAAAGCTGCAGGACGGTAACTGGAGACAGGCAATAAC
GCAACTGGAAGCGTTAGATAATCGCTATCCGTTTGGTCCGTATTCGCAGCAGGTGCAGCT
GGATCTCATCTACGCCTACTATAAAAACGCCGATTTGCCGTTAGCACAGGCTGCCATCGA
TCGTTTTATTCGCCTTAACCCGACCCATCCGAATATCGATTATGTCATGTACATGCGTGG
CCTGACCAATATGGCGCTGGATGACAGTGCGCTGCAAGGGTTCTTTGGCGTTGACCGTAG
CGATCGCGATCCTCAACATGCACGAGCTGCGTTTAGTGACTTTTCCAAACTGGTGCGCGG
CTATCCGAACAGTCAGTACACCACCGATGCCACCAAACGTCTGGTATTCCTGAAAGATCG
TCTGGCGAAATATGAATACTCCGTGGCCGAGTATTATACAGAACGTGGTGCATGGGTTGC
TGTCGTTAACCGCGTAGAAGGCATGTTGCGCGACTATCCGGATACCCAGGCTACGCGTGA
TGCGCTGCCGCTGATGGAAAATGCATACCGTCAGATGCAGATGAATGCGCAAGCTGAAAA
AGTAGCGAAAATCATCGCCGCAAACAGCAGCAATACATAACAGAAACCTGAAACACAAAA
CGGCAGCCTTGAGCTGTAATGCCAGTCAGTTAAGGATCAGTTGACCGATCCAGTGGCTGT
GTAAGAATCCGGAAACGCTCACTCGTTTCCGGATTTTTTTATGCTCATTGGGCAGGCACT
TGATTTGGTATCCCGTTACGATTCTCTGCGTAACCCACTGACTTCTCTGGGGGATTACCT
CGACCCCGAACTCATCTCTCGTTGCCTTGCCGAATCAGGTACTGTAACGCTACGCAAGCG
CCGTCTTCCCCTCGAAATGATGGTCTGGTGTATTGTTGGCATGGCGCTTGGGCGTAAAGA
ACCTCTTCACCAGATTGTGAATCGCCTGGACATCATGCTGCCGGGCAATCGCCCCTTCGT
TGCCCCCAGTGCCGTTATTCAGGCCCGCCAGCGTCTGGGAAGTGAGGCTGTCCGCCGCGT
GTTCACGAAAACAGCGCAGCTCTGGCATAACGCCACGCCGCATCCGCACTGGTGCGGCCT
GACCCTGCTGGCCATTGATGGTGTGTTCTGGCGCACACCGGATACACCAGAGAACGATGC
AGCCTTCCCCCGCCAGACACATGCCGGGAACCCGGCGCTCTATCCGCAGGTCAAAATGGT
CTGCCAGATGGAACTGACTAGCCATCTGCTGACGTCGATGACGGACGCCATGCGCTTCCC
CGGAGGAGAAATGGCGGATCTGTACAGTCATCGCTGGGAAATCGAACTGGGATACAGGGA
GATAAAACAGACGATGCAACTGAGCAGGCTGACGCTGAGAAGTAAAAGCCGGAGCTTGTG
GAGCAAGAGCTGTGGGGTGTCTTACTGGCTTATAAACTGGTGAGATATCAGATGATTAAA
ATGGCGGAACATCTGAAAGGTTACTGGCCGAATCAACGGAGTTTCTCAGAATCATGCGGA
ATGGTGATGAGAATGCTGATGACATTGCAGGGCGCTGCACCGGGACGTATACCGGAGCTG
ATGCACGATCTTGCAAGTATGGGACAACCAGTGAAATTACCGACAAGAAGGGAAAGGGCC
TTCCCGAGAGTGGTAAAGGAGAGGCCCTGGAAATAACCCACAGCCCCGAAAAAGAGCCAG
TCAGTTGCTTAACTGATCGGCATTACAGCCTTGAGCTGCCGTTTTTTATTCTGTTAGTTG
TGAAACTGAAGCGATTTAGTCACTATCGATCTCATCAAATATGGCTCGCTTTGAGATATT
CCTCAAGTAAAAAAACTCATCTTCCTGCGATTTCTCACAAAAAAGATTCGTTGACAAAAA
GTGACAAAATTATGAGATTTCCATCACACATTTTGACATCAGGAACGTTATGCTGAATTC
ACCAAGACGGGAAGACAAGAGGTAAAATTTATGACAATGAACATTACCAGCAAACAAATG
GAAATTACTCCGGCCATCCGCCAACATGTCGCAGACCGTCTCGCCAAACTGGAAAAATGG
CAAACACATCTGATTAATCCACATATCATTCTATCCAAAGAGCCACAAGGGTTTGTTGCT
GACGCCACAATCAATACACCTAACGGCGTTCTGGTTGCCAGTGGTAAACATGAAGATATG
TACACCGCAATTAACGAATTGATCAACAAGCTGGAACGGCAGCTCAATAAACTGCAGCAC
AAAGGCGAAGCACGTCGTGCCGCAACATCGGTGAAAGACGCCAACTTCGTCGAAGAAGTT
GAAGAAGAGTAGTCCTTTATATTGAGTGTATCGCCAACGCGCCTTCGGGCGCGTTTTTTG
TTGACAGCGTGAAAACAGTACGGGTACTGTACTAAAGTCACTTAAGGAAACAAACATGAA
ACACACACCGTTTTTCTTCGCATTCTTTTTTACCTTCCCCTGAATGGGAGGCGTTTCGTC
GTGTGAAACAGAATGCGAAGACGAACAATAAGGCCTCCCAAATCGGGGGGCCTTTTTTAT
TGATAACAAAAAGGCAACACTATGACATCGGAAAACCCGTTACTGGCGCTGCGAGAGAAA
ATCAGCGCGCTGGATGAAAAATTATTAGCATTACTGGCAGAGCGACGCGAACTGGCCGTC
GAGGTGGGAAAAGCCAAACTGCTCTCGCATCGCCCGGTACGTGATATTGATCGTGAACGC
GATTTGCTGGAAAGATTAATTACGCTCGGTAAAGCGCACCATCTGGACGCCCATTACATT
ACTCGCCTGTTCCAGCTCATCATTGAAGATTCCGTATTAACTCAGCAGGCTTTGCTCCAG
CAACATCTCAATAAAATTAATCCGCACTCAGCACGCATCGCTTTTCTCGGGCCCAAAGGT
TCTTATTCCCATCTTGCGGCGCGCCAGTATGCTGCTCGTCACTTTGAGCAATTCGTTGAA
AGTGGCTGCGCCAAATTTGCCGATATTTTTAATCAGGTGGAAACCGGCCAGGCCGACTAT
GCCGTCGTACCGATTGAAAATACCAGCTCCGGTGCCATAAACGACGTTTACGATCTGCTG
CAACATACCAGTTTGTCGATTGTTGGCGAGATGACGTTAACTATCGATCATTGTTTGTTG
GTCTCCGGCACTACTGATTTATCCGCCATCAATACGGTCTACAGCCATCCGCAGCCATTC
CAGCAATGCAGCAAATTCCTTAATCGTTATCCGCACTGGAAGATTGAATATACCGAAAGT
ACGTCTGCGGCAATGGAAAAGGTTGCACAGGCAAAATCACCGCATGTTGCTGCGTTGGGA
AGCGAAGCTGGCGGCACTTTGTACGGTTTGCAGGTAATGGAGCGTATTGAAGCGAATCAG
CGACAAAACTTCACCCGATTTGTGGTGTTGGCACGTAAAGCCATTAACGTTTCTGACCAG
GTTCCGGCTAAAACGACGTTGTTAATGGCGACCGGACAACAAGCTGGTGCACTGGTTGAA
GCGTTGCTGGTACTGCGCAACCACAGTCTGATTATGACCCGTCTGGAATCACGTCCGATT
CACGGTAATCCGTGGGAAGAGATGTTTTATCTGGATATTCAGGCCAATCTTGAATCAGCG
GAAATGCAAAAAGCATTGAAAGAGTTAGGGGAAATCACCCGTTCGATGAAGGTATTGGGC
TGTTACCCAAGTGAGAACGTAGTGCCTGTTGATCCAACCTGATGAAAAAGTGCCGGATGA
TGTGAATCATCCGGCACTGGATTATTACTGGCGATTGTCATTCGCCTGACGCAATAACAC
GCGGCTTTCACTCTGAAAACGCTGTGCGTAATCACCGAACCAGTGCTCCACCTTGCGGAA
ACTGTCAATAAACGCCTGCTTATCGCCCTGCTCCAGCAACTCAATCGCCTCGCCGAAACG
CTTATAGTAACGTTTGATTAACGCCAGATTACGCTCTGACGACATAATAATGTCGGCATA
AAGCTGCGGATCCTGAGCAAACAGTCGCCCGACCATCGCCAGCTCAAGGCGGTAAATCGG
CGAAGAGAGCGCCAGTAGTTGCTCAAGCTGAACATTTTCTTCTGCCAGGTGCAGCCCATA
AGCAAAAGTAGCAAAGTGGCGCAAAGCCTGAATAAACGCCATATTCTGATCGTGCTCGAC
AGCGCTAATACGATGCAACCGAGCGCCCCAGACCTGAATTTGCTCCAGAAACCATTGGTA
TGCTTCCGGCTTACGTCCATCACACCAGACCACAACTTGCTTTGCCAGGCTACCGCTGTC
CGGGCCGAACATCGGGTGTAACCCCAGCACCGGGCCATCGTGCGCCGCCAGCATGGCCTG
TAATGGCCCATTTTTCACCGATGCCAGATCAACCAGAATACAATCTTTCGGTAAAGGCGG
TAATTTGCCGATAACTTGCTCAGTAACGTGGATGGGCACACTAACAATCACCATTCCGGC
ATCGGCAACAATATCAGCCGCTCGATCCCAGTCATGTTGCTCCAGAATCCGCACCTGATA
ACCCGAGAGTGTCAGCATCTTCTCGAACAGACGCCCCATCTGACCGCCACCACCGACGAT
AACCACCGGGCGCAGTGACGGACAAAGCGTTTTAAATCCTTTGTCGTTTTCACTGGAGTA
AGATTCACGCATCACCCGACGCAAAACATCCTCAATCAGATCTGGCGGTACACCCAGAGC
TTCCGCCTCTGCACGACGCGAGGCCAACATAGATGCCTCGCGCTCCGGAACATAAATAGG
CAGTCCAAAGCGGCTTTTCACCTCGCCCACTTCAGCAACCAGTTCCAGACGCTTCGCTAA
TAAATTCAGCAGCGCTTTATCGACTTCATCAATTTGATCGCGTAATGCGGTCAATTCAGC
AACCATAATAAACCTCTTAAGCCACGCGAGCCGTCAGCTGCCCGTTCAGATCCTGATGAA
TTTCACGCAGCAAGGCATCGGTCATTTCCCAGCTAATGCAGGCATCGGTTACGGATACAC
CGTATTTCATTTCACTGCGCGGTTGCTCGGAAGACTGATTGCCCTCGTGGATATTACTTT
CGATCATCAGACCAATAATTGAGCGATTGCCATCTTTGATTTGAGCAACCACGGATTCTG
CCACCGCAGGCTGACGACGATAATCTTTATTGGAATTACCGTGGCTGCAATCTACCATCA
GAGACGGGCGCAGTCCCGCCTGTTCCATCTCTTTTTCACATTGCGCAACATCCGCAGGGC
TATAGTTTGGCGCTTTACCACCGCGCAGGATCACATGCCCGTCCGGATTCCCCTGAGTTT
GTAGCAACGCAACCTGCCCTGCCTGGTTAATGCCAACAAAACGGTGCGGCTGGGCGGCGG
CACGCATAGCGTTAATTGCCGTTGCAAGGCTGCCGTCGGTGCCGTTTTTAAAACCAACCG
GCATGGAAAGCCCGGAGGCCATTTCACGGTGAGTTTGCGATTCCGTTGTACGAGCACCAA
TTGCTGACCAGCTAAACAGATCGCCCAGGTATTGCGGGCTATTCGGATCTAACGCTTCCG
TCGCCAGTGGCAGTCCCATATTCACCAGCTCAAGCAGCAATTTACGCGCGATCTGCAGCC
CGGCTTCTACATCAAAAGAGCCATCCATATGGGGATCGTTAATTAACCCTTTCCAGCCGA
CAGTGGTACGGGGTTTTTCAAAATAGACGCGCATTACCAGATAGAGGCTATCGCTGACCT
CTGCGGCAAGGGCTTTAAATCGACGAGCATATTCCAGAGCAGTTTCCGGATCATGAATGG
AACAAGGACCACATACTACCAGCAGACGAGGATCGCGCCCGGCGATAATATCTGAAATGG
TTTTACGCGAGTCAGCAATCTGGGCTTCTTGTTGCAGGCTTAATGGAAAAGCGGCCTTCA
GTTGTTCCGGAGTCATTAAAACCTGTTCGTCGGTAATATGTACGTTATTCAGCGCGTCTT
TCTGCATGATGGCGATCCTGTTTATGCTCGTTTGCGATAGTTGATCCTCAGCGAGGATGA
CGTAACGATAACACATAAAGTAAAGTTTTCAATCCATATTTCGTACGCATTTCTTTACAC
AGGCAATTTATTCGCGCTTTTTTACCCTTATTTATGTATATATAAATTTACACCATCTAT
AAAAATAATCCGCTATGCTTTGAAAAAGGAGAAAGAAATGATGAAAAAATTTATCGCCCC
CTTGTTGGCTTTACTGGTTAGCGGATGTCAGATTGATCCTTATACTTACGCGCCAACCTT
AACCAGCACCGACTGGTATGATGTTGGTATGGAAGATGCGATATCGGGCAGCGCCATTAA
AGATGACGATGCATTTAGCGATTCACACGCGGATCGCGGTCTATACCTTAAAGGATATGC
CGAAGGGCAAAAGAAAACTTGCCAGACTGATTTTACTTATGCCCGGGGACTTTCTGGTAA
AAGCTTTCCTGCCAGCTGCAATAATGTTGAAAATGCCAGCCAACTGCATGAAGTATGGCG
AAAAGGGGCTGATGAAAATGCCAGCACAATACGATTAAATTAATTACTCACCCAAATAAA
TTAAGCATGAGATTTTACTCATTATGTTTTATTTCTCACATTGATGACGACCGCATGAAA
GGATGATATTTTAATGAGCATTCTGAAAAAATATCGATGCATTTCGAGCGAAGATGGTGA
GGATCCCTGAATGCGTTTTTCTCACCGACTGTTCTTACTGCTGATTCTCCTGCTGACGGG
AGCACCAATACTCGCTCAGGAACCTTCTGACGTTGCGAAAAACGTGCGTATGATGGTTTC
CGGTATTGTCAGTTACACCCGCTGGCCTGGGCTATCAGGGCCACCAAAGTTATGTATCTT
TTCATCTTCACGTTTTAGTACCGCCTTACAAGAAAATGCTGCTACATCTTTACCTTATCT
GCCTGTCATCATTCATACTCAACAAGAGGCGATAATTTCAGGCTGCAATGGTTTTTATTT
TGGCAACGAGTCACCGACATTCCAGATGGAATTAACCGAACAATATCCGTCAAAGGCGTT
ATTATTAATTGCCGAACAAAATACCGAGTGCATTATTGGTAGCGCCTTTTGTCTGATCAT
CCAAAATAATGACGTCAGATTTGCCGTAAACCTGGATGCCTTATCGCGTAGCGGTGTAAA
GGTCAACCCGGATGTCTTAATGCTCGCACGGAAGAAAAATGATGGATAACGATAATTCTC
TTCATAAGCGCCCCACGTTTAAAAGAGCATTACGCAACATCAGCATGACCAGCATATTTA
TCACTATGACGCTGATCTGGCTGCTGCTTTCCGTGACGTCAGTGCTAACCCTGAAACAAT
ACGCGCAAAAAAACCTGGCACTGACAGCAGCAACAATGACTTACAGTCTGGAAGCAGCTG
TCGTTTTTGCCGATGGCCCTGCAGCAACTGAAACACTGGCAGCGCTGGGCCAGCAAGGCC
AATTTTCAACTGCAGAAGTGCGTGATAAGCAGCAAAATATTCTGGCATCCTGGCATTACA
CCCATAAGGAACCAGGCGATACTTTCAGCAATTTCATAAGCCACTGGCTCTTCCCTGCCC
CCATCATTCAGCCGATTCGCCACAATGGTGAAGCCATTGGCGAAGTACGCTTAACTGCTC
GCGACAGTTCAATCAGCCATTTTATCTGGTTTTCGCTCGCTGTCCTGACCGGTTGTATTC
TGCTGGCATCAGGCATCGCAATTACCCTCACCCGCCATTTGCACAATGGCCTGGTGGAAG
CGCTGAAAAATATCACCGATGTCGTACATGATGTGCGTTCTAACCGCAATTTTTCCCGAC
GAGTTTCGGAAGAACGTATCGCTGAGTTTCACCGCTTCGCTCTCGACTTCAACAGTCTGC
TGGATGAAATGGAAGAGTGGCAGCTTCGTTTACAGGCCAAAAATGCGCAGCTTCTACGTA
CCGCGCTACATGACCCATTAACCGGACTGGCTAACCGCGCAGCGTTTCGTAGCGGCATCA
ACACGTTGATGAACAATTCCGATGCCCGAAAAACGTCGGCGTTACTATTTCTTGATGGCG
ATAATTTCAAATATATCAATGATACCTGGGGTCATGCGACGGGCGATAGAGTCTTGATTG
AAATAGCAAAACGGTTAGCTGAATTTGGCGGGCTGCGACATAAAGCATACCGCCTGGGCG
GCGATGAATTCGCTATGGTGCTCTATGATGTACAGTCGGAATCTGAAGTGCAGCAGATAT
GCTCAGCACTGACACAAATTTTTAATCTCCCATTTGATCTTCATAATGGCCATCAGACTA
CCATGACATTAAGCATTGGTTACGCGATGACCATTGAGCACGCCTCTGCGGAAAATTTAC
AAGAGCTTGCCGATCACAATATGTATCAGGCCAAACACCAGCGTGCCGAAAAGCTGGTGA
GATAACAAGGATATATCGATATGATAAAGCACCTGGTAGCCCCCTGATTTTCACCTCGCT
AATACTTACTGGCTGCCAGTCCCCTCAGGGAAAGTTTACTCCTGAGCAAGTCGCCGCTAT
GCAATCTTATGGATTTACTGAATCCGCCGGCGACTGGTCGCTGGGCTTATCAGATGCCAT
TCTGTTCGCAAAAAATGACTACAAATTGCTCCCGGAAAGCCAGCAACAAATCCAAACCAT
GGCAGCCAAATTGGCCTCGATAGGGCTAACACATGCCCGTATGGATGGACACACCGACAA
CTATGGTGAAGACAGTTACAACGAAGTCTTATCATTAAAACGGGCGAATGTCGTGGCCGA
TGCATGGGCTATAGGTGGACAAATTCCGCGCAGCAATCTCACCACACAGGGTTTAGGAAA
AAAATATCCCATAGCCAGTAACAAGACCGCCCAGGGCCGCGCCGAGAACCGCCGCGTCGC
AGTGGTGATTACAACCCCTTAAAACATGAGCAAACAGACAAAAAAGGGCCAGCCAATTGG
CCAGCCCTTCTTAACAGGATGTCGCTTAAGCGAAATCTTAGTTAAGACGCTTTTACATGA
TACCATTGATAAACATGCATTTTTCATTATAAACAGTTAGTTATATGTATCACTAGTGTA
GTCAAGTGCAGCCATAAACATGCTGTGTGGGCAGATTGTGGACACTACTTATTTCCCTGT
CCAATCTTACCCGCAACTGCCTCGGTAAGCTTTACTAAGGTTTCAAGTTCATTTTTGTCT
AATTTTCTTGCTTCAATAATTTCAGTAGTCTGCCCTGATTCTAGTTTTCCAACTCTTGAG
CTAAAATTAATTTTATCCAGAAGGTCTATCATATCGATATCTTTCTGGCTAGCCATTACA
AGCTTTATAATGGCATAGCTTTCCTCACGTGAACGTTTTATTGCCTCGTAATAGCGAAAC
TCATCCATCGTAACCCGATATTGCTTCAAAAAGAAAAATGCGATTAACTCCAAGAAAATC
AACACGCCAAAATTAGGGAGAAGATACATTACCTTGGTTACCGCATCATCCTTAGCATCA
ATTACATGTGATTGAGAATAGAAGAAACCTAATCCAACTATTGCAAAACAAACACCGACT
AATAAATAAAGACTACCGCGAGAATATATGTTTTTCGCAAGACCTTCAGAGCTATTAATC
AAACCTTTAAGATAAAAATCCAGAGATTCATCTTCATCAGCAGCAGCCCTTTCCTCTTGA
GCCTTCTTGAGTAGTTTTATCTCATTTATAATATCGACAATATTAAACATCGATGATTTG
TCGACTGAATCACTCCCTGTAATTCTCATAAACATTCTTTGGATTGGAGACACACCATAG
ATAATGGTGTAAACGATTACAAATGACACTGCGAATATTGACCTGATAAAGCTCGGCAAA
TGTGTAAGATCTGCTCTCGCACTGGGAAATAAATAATAAAAGGTTGAGTCTAATATCCCT
GTAGCAAAAATTACATTTGCAACTAGAAAGACTGCACCTATCTCAACTAAATTATAAAAA
CCACGAGTGCGTACCCTAATGACTTTGGCCTCGGTCATTCTTGGAGGTGTTTCGATGGTT
GGCTCACTCATCATATAATCCTGTTAAATTAGAAATAGGGTTAAGAGTTACAGCTTCTTC
TAAATGATCTGGTGCAAAATGAGCGTATCTCATGGTTTCCCTAATGTTAGAATGGCCCAA
GATTCGTTGCAGTACTAAAATGTTCCCACCATTCATCATAAAGTGACTCGCAAATGTATG
ACGTAACACATTCGTTTTTTGCCCTTCAGCTAACTCTATATCGGTCAGAGCGAGCATTTT
CTTGAACTCCTGATAGCAGGGGTGGAACATTTTTCCCTGTAAAGGAGCCAACTCGTCATA
TAGCCACCGAGGGATCGGTACTGTACGATTCTTCTTTCCCTTGGTTTGGGAGAAGGCTCT
GCATTACCTGTTGGCGTCCCTGTTCCGTGGCCTTCAGCCACACCGCCAACAGGCTGGCTG
AAATGCAATGGTGCAGCTTTTTCTGCTGAAGAATACCCGGAACTGGCAAAGGCTTATCCG
GCAAATAAATTGCCTGATTTACGTGGTGAGTTTATTCGTGGCTGGGATGACGGACGGGGG
ATTGATACAGGTCGCTCTATTTTAAGTATTCAGGGGTATGCAACGGAGGATCATGCTCAT
GGATTACCGTCAAGATCCACGATTGTGACTGATGCAACGATTAATTTCTATTTTGATGAA
AGCTGGGTAAATAGTGGCACTGACATTATCAAAAGAGGAAACACAAACGATGCCGGATTA
CCAGCACCGGATTATGGAACCTTTAAAACATATAAACAATCAGTGGCTGGTTTAGGTGCC
GCAGCCTCAGAAACGCGTCCGCGTAATATTGCATTTAACTATATCGTGAGGTCAGCCTGA
TGCATAAAGCAATATTAAATAGTGAGCTTATTGCAACAAAGGCAGGGGATGTTACCGTTT
ATAACTACGATGGTGAAACACGGGAATATATTTCCACGTCAACTGAATATCTTGCGGTTG
GCGTCGGTATCCCGGCATGTTCTTGTTTAGATGCGCCAGTTACACATAAAGCTGGTTATG
CAATCTGCCGTTCTGCAGATTTTAACTCATGGGAATATGTGCCAGACCATCGCGGTGAAA
TCATCTATAGCACAGAAACAGGAGAATCGAAAGAAATCACAGCTCCGGGTGATTATCCTG
AAAATACAACCACTATCGCCCCGTTAACGCCATACGATGAATGGGATGGTGAGAAATGGG
TAACAGATACTGTGGCACAGCATAGCGCCGCAGTAGGCGCGGCAGAAGCACAGCGTCAGT
CACTGATTGATAATGCAATGGCTTCCATTAGTCTGATTCAGCTGAAATTGCAGGCCGGAC
GGAATCTGACGCAGGCAGAAACCGCCCGACTTAACGCTGCGCTGGATTACATTGACGCGG
TGACGGCAACAGATACCAGCACCGCGCCGGATGTCATCTGGCCTGAACTGCCGGAGGCGT
AGGCCATTCAATATCTGGCGCACCGGAAGTATCGACCAGTTCCAGTGCGTCCAGATAATC
CAGCCACAAATTATATTGCGCCAGTTCCTCACCTTTCAGACGACCAATAGCCGCTTTACC
AGGCCATTGTTTACTGTTCATATAATCGTTGGCCTGATTAATCAGTTGCTGCTTTTCAAG
TTCGGCTGCAGCAATCTGTTCCTCATGTGTTGGTGGTGGAATTTCAGTCCATGCAGGAAA
ACTATTTTCTCCAGCGATACGGATTTTTCCTTTCGGCGGTAATCCGGAAAACTCAATATA
CACTTGCTCATCAACTTCAACAGCATCATCTGGCCATGAGTCAGCTTGAGTGTAATCCTC
TTTCATCTCCAGCGGATAGAAAGAGTTTGTAGTCGCGGAATATATGTAATTCATTTTTCA
CTCCATATAGCTAAATTAACAGCCTAACGCTAAAAATGAAGCGCCGAGGCCAGGAGTACT
GGCTCTGGATATAAATTTAACCGGGTCGGGACTAAAACCTGCACAGGCAATATAACCAAC
AGCCCCGCTATCTGGTGTGTAGTCTTGTGAGACCAAAACACGCAGACATCTGTTTGGAAA
TGCAATCGGGAAATGGGTTACTACATCCTGTGCAATGCCTGGTGCGCCGATTGAGCCCCA
CTGAAGAATAAAACCTGATGGAAATTTTTGATATCCAGTACCTGAAACAGAAAGCGTGAA
GCTACCCATATCAGGTATCTGATTCGCCCCTGTCCCTACATTCCTTTTAGCCGCTTCTCC
CAAACCAACGTTTAAGAAAATGTAGTTTTCCCCCTAGCTGGCATCATTTGGGCTTTTGCA
TGAGGGAAAACAAATGCAGGTTGGCTATGTGCGCGTATCAACAAATGAACAAAATACCGC
GCTACAGCGTGACGCGCTGGAACGGTCGGGATGTGAGCTAATTTTCGAGGATAAAATCAG
CGGTAAATCGACAAACAGGCCAAGGTTAAATCGCGCACTCAGGCAACTTAATGCCGGTGA
TACTCTCGTTGTCTGGAAGCTCGACAGGCTCGGGCGTAGCATGCGCCATCTTGTCTCTAT
GACTGAAGAGCTTCGCCAGCGAGGGGTTAATTTCAGAAGCCTGACCGACAGTATTGATAC
CTCAACCCCGATGGGGCGATTTTTCTTTCACATCATGGGCGCTCTTGCAGAAATGGAACG
CGAGTTAATCGTCGAACGAACCCGCGCCGGGCTGGATGCAGCCCGGGCACAAGGCAGGAT
CGGAGGTCGTAGGCCGAAGCTGACGCCTGATGAATGGGCTCAGGCTGGCCGGTTGATTGC
GGCCGGAGAATCCCGACAGCGTGTTGCACTGATTTTTGATGTGGGCATATCGACGCTGTA
TAAAAAATTTCCGGCGACAAATCCCGTTGTGTCAGCCACCGGCGAACCCTGACAAATAGC
CGCATACAGGCGTAAACCAGACAATATCACTCACCTCAACTAACGGAGTTAAACGGATGA
GTGATTATCATCACGGTGTCGAGGTCGTCGAAATTAACGACGGCACCCGCACAATCTCGA
CGGTATCAACGGCGGTCGTTGGCATGGTCTGCACAGCCAGTGATGCTGACGCCGGGGCTT
TCCCTCTCAATGAGCCGGTGCTGATTACCAACCCACAAAGCGCCATCGCAAAAGCCGGTA
CTAAAGGTACCCTGGCAAAATCCTTACAGCTCATCGCTAACCAGTCAAAACCGGTTGTCG
TTGTTGTGCGTGTCGCGGAGGGTACCGGCGACGGCGAAGAGGCACAGGCGCAAACCATTT
CTAACATCATCGGCACCACGAATGAGAATGGCAAATATACCGGGATGAAAGCGCTGTTAA
CGGCGAAAGCGGTCACCGGCGTGAAGCCACGTATTCTCGGTGTGCCGGGGCTCGATACTC
AGGAGGTGGCGACCGCGCTTGTCTCCGTGGCTCAGAAGCTGCGCGCTTTCGCCTATGTCA
GCGCGTGGGGCTGTAAAACCATTGCTGACGTTATCGCCTACCGCGAAAACTTCAGCGCCC
GTGAGCTCATGATTATCTGGCCTGACTTCCTCGGGTGGGATACCACGGCCAACGCGACCA
CAACCAGTTATGCAACAGCGATCGCGTTGGGACTGCGCGCAAAAATCGACAATGATACAG
GCTGGCATAAAACCCTGTCAAACGTCGGCATCAATGGCGTCACCGGTATCAGTGCGTCGG
TCTTCTGGGATTTGCAGGAATCTGGCACTGATGCCGACCTGCTGAATGAGGCCGGTGTTA
CGACGCTGATTCGTGCCGATGGTTTCCGCTTCTGGGGTAACCGTAATTGCTCCGATGACC
CGCTGTTTCAGTTTGAGAACTACACCCGCACCGCACAGGTCATAGCCGACACAATAGCCG
AGGGGCATATGTGGGCGAACGATAAGCCCATCACCGCGACGTTGATTCGCGACATTATCG
ACGGCATCAACGCGAAATTCCGCGAGCTGAAAACCGGCGGTTACATCATCGATGCGACGT
GCTGGTTTGACGAAGAGGCCAACAGTAAAGAAACCCTGAAAGCCGGGAAACTGTTTATCG
ATTATGACTATACGCCGGTGCCGCCACTCGAACACCTGACCTTACGCCAGCGCATTACTG
ATAAATATCTGGCGAATCTTATCTCGTCCGTCAACAGCAAATAAGGAGCCTGACAAATGG
CATTACCGCGCAAGCTCAAACTCATGAACCTGTTTATCGATGGGGTGAGTTATCTCGGCG
TCGTGCAGTCCGTCACGCTGCCGAAATTAACCCGCAAGCTCGAGAACTATCGCGGCGGCG
GGATGAATGGTTCGGCACCGGTCGACCTCGGCCTCGATGACGATGCGCTGTCGGCTGAAA
TCTCTCTCGGCGGCTTCCCCGATGACGCTATCTGGTCGTTATACGCTGCCACCGGCGCGG
CCTCCGTACCGCTACGTTTTGCCGGGTCTTACCAGCGTGATGACACCGGCGAGACCGTGC
CGGTTGAGGTTGTTCTCCGTGGCCGTCAGAAAGAAATCGACCTCGGTGAAGCCAAACAGG
GCGAAGACACCGAGTCGAAAATCGCTCTCGCGTGTACCTATTTCAAGCTGACGATGAATG
GCTCGGAACTGGTGGAAATCGACACCGTGAACCTCATCGAAAAAGTGAACGGCACCGACA
TGCTCGAGGCGCACCGACAAAATATCGGCCTGTAATTTATGCCCCGGTCAGCATGGCTGG
CCGGGCATCCTGAAACCAGAATTTAACGAGAAATATCATGGATAAAACTAACGAAAATAT
CGTCACTCTGATTAAACCCATTAAGCGCGGTGAGCAGGTTATTACTGACGTCACCCTGTT
AAAACCGTGTGCCGGAACCCTTCGCGGTGTCAGCCTGGCATCAGTCGCAAACTCTGACGT
CGATGCGCTGATTAAAGTGCTGCCGCGCATGACCATGCCGTCGCTGACCGAGCAGGAAGC
CGCCGCACTGGAGCTGCCCGACCTGCTGTCGTTTGCCGGTAAGGTGGTCGGTTTTTTGTC
ACCGAGTTAGGCGGCGTAATCTTCCCGCAAAAACTCACGGTCGATGACCTGATGGCTGAC
ATAGCGGTAATTTTCCACTGGTCGCCATCAGACCTGTATCCCATGAGCCTGACCGAACTC
GTCAACTGGCGCGAAAAAGCGCTACAGCGAAGCGGAAACACGAATGAGTAATAACCTCAA
ACTCGAAGTGCTGCTGAAAGCTGTCGACCAGGCGACCCGACCCTTTAAAGCGATCCAGAC
GGCGAGCAAATCGCTGTCTGGCGATATCCGCACGACTCAGCAATCCCTGCGTGATTTGAA
TGGTCAGGCATCGAAAATCGACGGTTTTCGCAAAACCAGCGCACAACTGGCGGTAACCGG
ACAGGCACTGGAAAAGGCAAAACAGGAAGCCGCCGAGCTGGCGGTGCAGTTTAAAAACAC
GGAACGGCCAACGGCGGCACAGGCCAGAGTGCTGGAATCAGCAAAGCGTTCGGCTGAAGG
GTTACAGGCAAAATATAACAGCCTCACCCAATCGGTGAAGCGGCAACAGACCGAGCTCGG
CAAAGCGGGGATTAATACGCGCAATCTGTCGAATGATGAAAGCCGCCTGAAAAACTCTAT
CAATGAAACTACCGCACAACTTAACCGCCAGCGTGAAGCACTGGCGCGGGTCAGCGCGCA
ACAGGCAAAACTCAGCGCAGTACAAAAACGCTATCAGGCAGGAAAGGCACTGGCTGGAAA
TGCGGCATCGATGGGCGCTGCCGGGATAGGCATGGCAACGACCGGAGCGCTTGCCGGTGT
TGCACTGATGAAGCCCGGTTATGATTTTGCTCAGAAAAACTCTGAGTTACAGGCCGTTCT
CGGTGTCGGTAAAGACTCAGCTGATATGGTGGCGCTCCGCAAACAGGCGCGCCAGCTCGG
TGACAACACCGCCGCGTCGGCTGATGATGCTGCCGGTGCTCAGATTATTATTGCAAAGGC
TGGCGGCGATGCTGCGGCTATTCAGGCCGCTACCCCCGTAACACTCGATATGGCGCTCGC
AAACCGTCGAACGATGGAAGAGAACGCCGGGTTATTGATGGGGATGCGCTCTGCCTTCCA
GCTTTCAAACGATAAGGTCGCCCATATCGGTGATGTTCTGTCGATGACGATGAACAAAAC
CGCCGCCGACTTTGACGGCCTGAGTGATGCGCTGACTTATGCCGCGCCGGTGGCGAAAAA
TGCCGGGGTCAGCATCGAAGAAACAGCCGCAATGGTCGGCGCACTGCATGACGCCAAAAT
TACGGGATCGATGGCGGGTACGGGGAGCCGTGCCGTATTAAGTCGCCTGCAGGCTCCAAC
GGGCAAAGCGTATGACGCCATTAAAGAGCTCGGCGTCAAAACGGCTGATGGTAAGGGGAA
CACACGTCCAATATTTACCATCCTGAAAGAAATGCAGCGGAGTTTTGATAAAAACAACCT
CGGCACCGGCCAGCGTGCCGAATATATGAAAACCATTTTCGGTGAAGAGGCCAGCTCGTC
GGCTGCGGTACTCATGACCGCTGCCTCGAGCGGGAAATTAGACCAGCTTACCGCTTCCCT
TAAAGCATCGGATGGCAAAACCGCTGAGCTGGTGAAGGTCATGCAGGATAACCTCGGCGG
CGATTTTAAAGAGTTTCAGTCTGCGTATGAAGCGGTAGGAACCGACCTGTTTGACCAGCA
AGAGTCATCATTAAGAAAGCTGGTACAAACGACGACAGGGTATGTATTGAGGCTCGATAG
CTGGATCCAAAAGAACAAATCTCTTGCCACCACGCTGGGTGTCATTACGGCGGCAGCTGT
CGGTATTGTGGGGATGATTGGTGCCATTGGCCTTGTATCGTGGCCGGTAATTACTGGCAT
TAACGCCATCATTTCGGCGGCTGGTGCGCTTGGTGCGGTCTTTACGACAATCAGTGGCGG
GGTCATTGCGGCTATTGGTGCTATTACGTGGCCTGTCGTGGCGGTAGCGGCGGCTGTTGT
CGCTGGCGCGCTGCTTATCCGTAAATACTGGGAGCCTGTCAGCGCATTCTTTGCCGGTGT
GGTCGAGGGGCTCATGAGTGCCTTTGCGCCGGTCGGGGAAATGTTCGCCCCGCTGGCACC
CATTTTCGACGGTCTCGGCGAAAAACTTCGCGGCGTCTGGCAGTGGTTTAAAGACCTGAT
AGCGCCGGTGAAAGCGACTCAGGACACGCTCAACAGTTGTCGTGATGTTGGGGTTATGTT
CGGTCAGACGCTGGCCGATGCACTGCTGATGCCGCTTAACGCCTTTAACAAGCTGCGAAG
CGGGATTGACTGGGTGCTCGAAAAACTCGGCATTATCAACAAAGAATCCAGCTCACTTGA
CCAGACTGCGGCGAAAGCCAATGCAGCGACGCAGAACGGTTACAGCCCGGCAATCAGCGC
ATACAACAGCTATCAGCCGGTCACGGCACCCGCCGGTAAAACCTACATCGACCAGAGTCG
GCCAATCTATCAAATCACCGTGCCGGGCAATGGTATGCCGGGAGATCGGTTGGGTAATGA
TTTGCAGGATGCATTAGAAAAGTATGAGCGCGAGAAGCGCGCCAAAGCCCGCGCAAGCAT
GATGCATGACTAAGGAGACTGATTATGATGCTGGCATTAGGTATGTTTGTTTTTATGCGT
CAGACGCTGCCCTACCAGAGCATGCAGCGCAGCGCGGATTATAGCTGGGCGTCAAACTCT
CGCATCGGGAAGCGTGACGCTTTTCAGTATCTCGGCGAGGGGGAAGATAAAATCACCCTG
AGCGGTGACCTGTATCCTGAGCTGACCGGCGGTAAGCTCACGATGCTGGCGCTTTATGCA
ATGGCTGAACAGGGGCGCGCATGGCCGCTTATCTCTGGCTCAGGCTGGATTTACGGGATG
TTTGTTGTCAGTAATGTCTCGGAGACCGGCACGGTATTTTTTGAGGATGGGACGCCACGA
AAAATCAGCTTCACCCTGTCACTGACCCGTGTCGATGAGTCGCTCGCCGCGGTGTATGGC
GATATTGGAAAACAGGCCGAAAGTCTGGTCGGGAAAGCTGGCGATCTGCTGTCGATGGTG
GGGGCGTAATCATGCTGGATATTATCACCGGCGCGGGTGCCACGCTGACGCCCGACTTTA
TGCTGACACTGGAAAGCAAAGATATCACCGGCAATATCAGTGACCGGCTGATTAACCTCT
CGATGACGGACAATCGGGGTTTTGAGGCCGACCAGCTCTACATCGAGCTCGACGATACTG
ACGGTCTGGTCGCATTGCCGATTCGCGGTGCGGTGCTGTCGCTGTATCTCGGGTGGAAAG
GTTTCTCTCTGGTCAGCAAGGGGCGATTTACCGTCGATGAGGTAGAGCACCGGGGGGCGC
CGGATACGGTAACCATTCGCGCCCGGGGTGCGGATTTTCGCGGGACGCTTAATTCCCGTC
GTGAGGAGTCATGGCATGACACCACGCTCGGCGCAATCGTCAGCTCGATAGCTGAGCGGA
ACAAGTTAACGGCCAGCGTCACTGATTCTCTTGCGGGGATCCAGATTCCGCATATCGACC
AGTCTCAGGAATCCGACGCCGTTTTCCTGACTCGCCTCGCAGAACGCAACGGCGGTGCGG
TCTCAGTGAAAGCGGGTAGATTGCTGATGCTCAAAGCGGGAAGCGGTACCACTGCCAGTG
GAAAAGCTATTCCTCAAATTACCATCCAGCGCGGTGACGGTGACCGGCATCAGTTTGCCA
TTGCCGACCGTGGCGCTTACACCGGCGTAACCGCTAAGTGGCTGCACACTAAAGACCCGA
AACCGGCGAAACAAAAGCAGACAGTGAAGCTGAAACGTAAGCCCAAAGAGCAACACCTCC
GGGCGCTACAGCACCCGAAAGCAAAACCAGTGAGCAGTAAAGTCACGGCCAAAAAGCAAA
AAGAGCAGGAAGCCCGCGAGGGTGAATACATGGCCGGTGAGGCTGACAACGTTTTCGCGC
TGACGACCATTTACGCGACAAAGGCGCAAGCGATGCGTGCAGCTCAGGCGAAGTGGGATA
AATTGCAGCGTGGGGTTGCGGAGTTCTCCATTATGTTAGCGACCGGCCGCGAGGATATTT
ACCCCGAAACGCCGGTCAGGGTCTCAGGCTTTAAGAGCGTTATAGACGAGCAAGCATGGA
TAATCAGCAGGGTGACCCATAATCTCGGTGGGAATGGCTTCACAACGGCTGTAGAGCTTG
AGGTGATGCTTTCGGATGTAGAATATGACACCGACGAATCTTGATTATACAAACAAAACT
TGCAAATGTAAGATTCAAGTTTATTATCCCCCTCAAGTCAGCAAGGAGAGGGAAGAAATT
ATGATGCACTGTCCGCTATGTCAGGATGCAGCACACGCACGATCAAGCCGGTACCTGAGC
ACTGAAACGAAAGAGCGCTACCACCAGTGCCAGAACATCAACTGCGGTTGCACTTTCGTC
ACCCACGAGAGCCTTGCTCGTTTTATCGTGAAGCCAGGAGAAATTGAACCCGCCCCACCC
CACCCGTCTAAATACCAACAACATCAGCTCTGGCTTTAAATCAAAGGCCTGCTTTGCAGG
CCTTCTTGTATCAAACTTAGATTGGTAATGAAAAAGCTATCGCCTTGCAGATATGTTGCT
TTGTTAACGCAGGATGTGTTGAAGCAAAAAGCGATAAAAAGCTTTTAGCTTCAACCGAAT
CATCATTAAGCGAAATATTATCTTTGATGAATGGATGAAGTGCGATTCCAGCGCTCATAG
ATAACGGCACATAGTTGATGAATATATCTTCTTTTGTGAGACCTAGCTGGTTTGCTTGTG
CTTCAAATGAATTAGCATCTAAATAATCACGTATACGTTCTTTGGCCTCTGGTCGGAGTC
TCGATTCTTGACGCGGCAGAGAAAGCATCTTATCAATATCTCCCCATGAGATAGGAACCT
CAAAATAGCCACCACCTTCTTCCTCTAGAGGTGCCGGGAAATTCACATAAAAATAGTTTT
TTTGCTGTGTAGGGTCGTTCATGGACTGACGATGATAGTTATAAATACTTCTAATACGGT
TGGCCTTGTTATGATGCCGAGCATTTCGAATAACAAGCATCATTAATAATTCAGGTTTCA
AATACCAGTCAGGCTCTAATCCATTGCTTTGCATGTTGTCATACAAATTATGAAAAGCAT
TAAGTTGTGTATTCAGGCCCGATTCTAAATTGCCAATTGCTTCAGCACGATCAATAGCCA
ACAAACGCTGTAGTGACCAGTTAGACTCTAATAAAACCCGAAAGGCCTGTGCAAGATCTT
CAAAAGAGTGGGAAAGCATCCTTTACGTCCTTATACGCACATTCATGAGATTTCAGTGTA
AACCAAAAGTACTAAACTAACAGTATCAGGTAGATGATGGATAGATGGGCTGGCAAGTAT
TCTATCTGCGTGGACACTCTATGGACACTCAAAATAAAAAAGGGGTTAGCTCTACGCTAA
CCCCTTGTTTTATAACACGCTTTGGATGTGGCGTGAACGCGTTATTAGTTAAGACGCTCT
TTGATACGAGCAGCCTTACCAGTACGCTCACGCAGGTAGTACAGTTTAGCTTTACGAACA
GCACCACGACGTTTGACAGAAATGCTGTCAACTACCGGAGAGTGAGTCTGGAAGACACGC
TCAACGCCTTCGCCGTTGGAAATTTTACGAACAGTGAATGCAGAGTGCAGACCGCGGTTA
CGAATAGCGATAACCACGCCCTCGAATGCCTGCAGACGTTTTTTGGAACCTTCAACAACC
CATACTTTCACTTCCACGGTATCACCCGGACGGAAGGAAGGTACGTCCTGCTTCATCTGC
TCTTGTTCAAGTTGCTTAATAATGTTGCTCATAATTTAATCTCTTATCCTGGGTAAACTG
ATATCTCGGGGGCTTACGCCATCCCATCATGTTTATGTTGCTGTTGTGCGTGTTCCGTTT
TGAACTCCGCCAGCAACCTTGCTTGCTCTTCAGTCAGAGCCAGGTTTTCCAGAAGTTCAG
GTCTTCTAAGCCAGGTACGGCCCAGCGACTGTTTCAAACGCCAGCGACGTATCTCGGCAT
GGTTGCCCGACAGTAACACTGGCGGAACTTCCATCCCTTCTAACACCTCAGGCCGCGTAT
AGTGCGGGCAATCCAGCAATCCTTCAGCAAAGGAATCTTCCGTTGCCGAGGCTTCATGTC
CCAGTACTCCCGGAATAAACCGGGAAACGGAGTCAATCAGCGTCATTGCTGGTAACTCAC
CACCACTGAGAACGTAATCGCCGATTGACCATTCTTCGTCAATTTCGGTTTGGATCACGC
GCTCATCTATACCTTCGTAGCGACCGCACACCAGAATCAATTTTTGATTCGTTGCCAGCT
CGCTGACGCCCGCTTGATCAAGCTTGCGTCCCTGTGGTGACAGATAAATCACCTTTGCGC
CTTCACCCGCCGCGGCTTTTGCTGCATGAATGGCGTCCCGCAAGGGTTGCACCATCATTA
ACATCCCCGGTCCGCCGCCGTAAGGACGATCGTCCACGGTACGGTGCCGGTCATACGTGA
AGTCGCGAGGACTCCAGCTCTGGATGCTCAGCAGGCCATTTTTAACTGCCCGGCCAGTTA
CCCCGTAATCGGTAATTGCGCGGAACATTTCAGGAAACAGGCTAATTATGCCAATCCACA
TAGCGCCGTCTTTTACCGTTTATCCGGTGGTTTAAAAACCAGGATCCCAATCTACTTCGA
TTGAACGAGTAGTGAGATCGACTTTCTTGATAACCTGCCCATCGAGGAACGGTACGAGAC
GTTCCTTGATACCAAACGCATCTTTCAGGTTTGCCTTAATGACGAGAACGTCATTAGATC
CGGTTTCCATCATATCTACGACTTTACCGAGATCGTAGCCTTCAGTGGTTACTACCTGGC
AGCCCATCAGGTCTTTCCAGTAGTAGTCCCCCTCTTCAAGCTGAGGCAACTGCGATGAAT
CCACGACAATTTCACAATTCGTCAGCAGGTTCGCCGCATCACGATCGTCAACGCCTTTCA
GCTTGATGATCATGTCCTGATTGTGGTGCTTCCAGCTTTCCAGCTGGACTTGCTGCCACT
GACCCGCCTTCTGGATAAACCAGGGCTGATAGTCAAAAATGCTTTCGGCGTCTTCGGTGG
AAGAAAACACTCTGAGCCACCCACGAATACCGTAAGACGAACCCATTTTTCCCAAAACGA
TGGGATCAACAGGTGCTTGCGCGGTGAGTTGTTTGCTCATCATGACCACCGTGACAGATT
AAGCTGCTTTGTTTACTTCTTTGATCAGCGCAGCAACGCGATCAGAAATAGTTGCGCCCT
GGCCAACCCAGTGAGCGATGCGATCCAGATCCAGGCGAGTGCCTTCTTCTTTTTCGCTAG
CGATTGGGTTGAAGAAACCAACGCGCTCGATGAAGCGACCGTTGCGTGCATTACGGCTGT
CAGCGACAACAACCTGGTAGAACGGACGCTTTTTAGCGCCGTGACGTGCTAAACGAATAG
TTACCATAACATCCTCTTGTGTGAATAAAACAACCGGACCCCATCGAGGAACGGAGTCCG
GTGTCATATTAAAAGCCCGAAAATTTTACTGATTTCTGGAGAAAATGCAATCAGCAGTTA
ATAACTCTATCGCATAAGGTCATTTAGCGACCAGGAAATCCCGGCGGCATCATCCCTTTC
ATGCTTCTCATCATCTTCGCCATCCCGCCCTTTTTCATTTTCTTCATCATGCGCTGCATG
TCGTCGAACTGTTTCAGAAGACGGTTAACGTCCTGCACCTGCATACCGCAACCGGCAGCG
ATACGGCGTTTACGCGAACCTTTGATGATTTCTGGCTTAGCGCGCTCTTTCATCGTCATC
GAGTTGATGATGGCTTCCATACGCACCAGCACTTTATCGTCCATCTGCGACTTGACGTTA
TCCGGGATCTGCCCCATGCCCGGCAGTTTGCCCATCAGGCTGGCCATGCCGCCCATATTT
TTCATCTGGCGCAGCTGCTCAAGAAAGTCGTTGAGATCGAAGCCGTCGCCTTTTTTCAGC
TTGCTGGCTAATTTCTCTGCCTGCGCGCGGTCAACCTTGCTTTCGATATCTTCGATCAGT
GACAGTACGTCGCCCATGCCGAGAATACGGGAGGCAATACGGTCCGGATGGAATGGCTCC
AGCGCCTCGGTTTTCTCGCCAACACCGAGGAACTTGATCGGTTTGCCAGTGATGTGACGA
ATAGAGAGCGCCGCACCGCCGCGGGCATCGCCGTCCACTTTGGTCAACACTACACCGGTA
AGCGGTAACGCTTCATTGAATGCTTTTGCCGTATTGGCCGCATCCTGACCGGTCATGGCA
TCGACCACAAACAGGGTTTCAACCGGATTAATCGACGCATGGACTTGTTTGATCTCGTCC
ATCATCGCTTCGTCAACGTGCAGACGACCGGCAGTATCCACCAGCAGCACGTCGTAGAAT
TTCAGTTTGGCTTCTTTCAGCGCCGCGTTAACGATATCTACCGGCTTCTGACCAACATCA
GAAGGGAAGAAATCAACGCCCACCTGCTCTGCCAGCGTCTCAAGCTGTTTGATTGCCGCC
GGGCGATAGACGTCGGCAGAAACCACCAGTACTTTCTTCTTGTGCTTCTCGCGCAGGAAC
TTACCGAGTTTACCAACGCTGGTTGTTTTACCGGCACCTTGCAGGCCCGCCATCAGCACG
ACCGCAGGCGGTTGCGCAGCCAGGTTCAGGGTCTGGTTCTCTTCGCCCATCGCCGCAACC
AGTTCGTTACGGACAATTTTGACGAACTCCTGCCCCGGCGTCAGGCTCTTATTAACTTCA
TGACCAACCGCTTTCTCTTTTACGCGATTGATAAACTCACGCACTACCGGCAGAGCGACG
TCCGCCTCCAGCAGCGCCATGCGCACTTCGCGCAGCGTATCTTTTACGTTGTCTTCAGTG
AGGCGTCCACGGCCACTGATATTGCGCAGCGTGCGCGACAAACGATCGGTTAAATTATCA
AACATTGTCTCTCGCCTGGGGTGGAAACGGTTGGCCGCAATCGCGACACATCATCAGTAT
TTTGCCGCAGTATAACATGAAGGCGTCTTTGTTGTTATGCAACGGTTGGAGCAGCGTTCA
CCTGACGCTATACTGCTTCTCTTTCTTATTGCTCAAACTGTCGACATTACTATGCCCGTT
TTTGCTCTGCTCGCGCTTGTCGCCTACTCCGTCAGTCTTGCGCTGATTGTTCCCGGTCTG
CTGCAAAAAAACGGCGGCTGGCGGCGCATGGCTATTATTTCTGCGGTCATCGCGCTGGTC
TGCCACGCAATCGCTCTGGAAGCCCGCATCCTGCCCGACGGTGATAGCGGACAAAACCTC
AGCCTGCTGAACGTTGGTTCATTGGTCAGTTTGATGATCTGTACGGTAATGACCATTGTG
GCTTCTCGCAATCGTGGCTGGTTGTTGCTACCCATTGTCTATGCCTTTGCGCTTATCAAC
CTGGCGCTGGCGACCTTCATGCCCAATGAATACATCACCCATCTGGAAGCAACGCCGGGG
ATGCTGGTGCACATTGGCTTATCGCTTTTTTCCTATGCCACGCTAATTATCGCTGCCCTG
TACGCGCTGCAACTGGCGTGGATTGATTACCAACTGAAGAACAAGAAGCTGGCGTTTAAC
CAGGAAATGCCGCCATTGATGAGTATCGAGCGTAAAATGTTCCATATCACGCAGATTGGC
GTGGTGCTGCTAACGCTCACTCTTTGCACTGGCCTGTTCTACATGCACAACTTATTTAGC
ATGGAAAATATCGACAAGGCCGTGCTCTCTATCGTGGCGTGGTTTGTCTATATTGTGCTG
CTGTGGGGACATTATCATGAAGGATGGCGTGGACGCCGCGTCGTCTGGTTTAACGTTGCG
GGTGCAGTCATTCTGACACTGGCCTACTTCGGCAGCCGAATTGTCCAGCAGTTAATCAGC
TAACCCCAGAAAAGGAGTTTCCCCTGGAACACATTTCTACTACTACGTTGATCATTATTC
TGATCATCATGGTGGTCATTTCAGCCTATTTTTCCGGGTCCGAAACCGGAATGATGACTC
TCAACCGCTATCGTCTTCGACATATGGCGAAACAGGGTAATCGCTCGGCCAAACGCGTCG
AAAAATTGCTGCGTAAGCCAGACCGCCTGATAAGCCTGGTGTTAATCGGCAATAACCTGG
TCAATATTCTTGCCTCCGCGCTCGGCACTATTGTTGGGATGCGTTTGTACGGCGATGCGG
GCGTGGCAATTGCAACTGGTGTGCTGACTTTTGTCGTACTGGTTTTTGCTGAGGTATTGC
CGAAAACCATTGCCGCGCTGTACCCGGAAAAAGTCGCTTATCCGAGTAGTTTTCTACTGG
CTCCGCTGCAAATTTTGATGATGCCGCTGGTCTGGTTGCTGAATGCTATTACCCGCATGT
TAATGCGCATGATGGGCATCAAAACCGATATCGTGGTTAGCGGCTCTTTAAGCAAAGAAG
AGTTGCGTACCATCGTGCACGAATCACGCTCACAAATTTCCCGTCGCAATCAGGATATGC
TGCTGTCGGTGCTCGATCTGGAAAAGATGACCGTCGATGACATCATGGTGCCGCGCAGTG
AAATTATCGGTATTGATATCAACGATGACTGGAAATCGATTCTGCGCCAACTCTCCCACT
CACCTCACGGGCGCATCGTGCTCTACCGTGATTCGCTGGACGACGCCATCAGTATGCTGC
GTGTGCGTGAAGCCTGGCGACTCATGTCGGAGAAAAAAGAGTTCACCAAAGAAACCATGC
TACGCGCCGCGGACGAGATCTATTTTGTCCCGGAGGGTACGCCGCTCAGCACACAGTTGG
TGAAGTTTCAGCGCAACAAAAAGAAAGTCGGCCTGGTCGTCAACGAGTATGGAGACATTC
AGGGACTGGTGACGGTCGAAGATATTCTCGAAGAGATTGTCGGCGATTTCACCACGTCGA
TGTCGCCAACACTTGCCGAAGAGGTCACGCCGCAAAACGACGGTTCGGTGATTATTGATG
GCACTGCCAACGTGCGAGAAATTAACAAAGCCTTTAACTGGCATCTACCGGAAGATGATG
CTCGCACGGTTAATGGCGTCATTCTTGAGGCACTGGAAGAGATCCCTGTCGCAGGCACCC
GCGTGCGTATTGGCGAGTACGATATCGATATTCTCGACGTACAGGACAATATGATTAAGC
AGGTAAAAGTTTTTCCTGTAAAACCGCTGCGCGAGAGTGTGGCGGAGTAACGAAAACGGC
CCTGCATTCGCATGCAGGGCCGTGAATTATTACGAAAACAGAAATTACGCTTTTGCTTTC
GCTACAGTTACCATCGCCGCACGAATCGTACGACCATTCAGCGTATAACCCTTCTGCATA
ATGCCCAGTACGTTACCTGGCGCAACGTCATCAGATTCCACCATTGCGATGGCCTGATGC
ACATTCGGGTCCAGCGGGACGTTAGTTTCGGCGATCACTTCAACGCCAAACTTACGCACA
ACATCCAGCATCGACTTCAGCGTCAGCTCAATACCTTCAACCATCGCGGACATATCCGGG
TTAGCTTTATCAGCCACTTCCAGCGCACGATCCAGGCTATCAATCACCGGCAGCAATTCG
TTGATGAATTTCTCCAGCGCGAATTTGTGGGCTTTTTCGATATCCAGTTCAGTACGACGA
CGCAGGTTTTCCATTTCGGCTTTTACGCGCAAAATGCCGTCACGTTCACGGGTCTGGGCT
TCAGCCAGCTGAGCTTCGAGATTCGCAATTTTTTCATCGCGCGGATCCACCTGCTCAGCA
GAAGCTTCTGGCTCAACTGCCTCAATCTCTTCGTGCTGATCCATGATAATTTCTTCCGGG
GCTTGCCCCTCAGGCGTTTTCTGTTCTTTACTACTCATGAATTTCTCCGCGTTTTTTTCG
CATTCATCTCGCTAACTTCGCTTATTATGGGGATCAGTTTCAGGGTTTCAAGGGAAGCAC
TCACATTGTCATCAATCTTCGCAACAAGGACCTCGGAAAAATGAATAATCATTTCAAGTG
TATTGGCATTGTGGGACACCCACGGCACCCCACTGCACTGACAACACATGAAATGCTCTA
CCGCTGGCTGTGCACAAAAGGTTACGAGGTCATCGTTGAGCAACAAATCGCTCACGAACT
GCAACTGAAGAATGTGAAAACTGGCACGCTCGCGGAGATTGGGCAACAGGCTGATCTCGC
GGTTGTCGTTGGCGGCGACGGTAATATGCTGGGCGCGGCGCGCACGCTCGCCCGCTACGA
TATTAAAGTTATTGGAATCAACCGTGGCAACCTGGGTTTCCTGACTGACCTTGATCCCGA
TAACGCCCAGCAACAATTAGCCGATGTGCTGGAAGGCCACTACATCAGCGAGAAACGTTT
TTTGCTGGAAGCGCAAGTCTGTCAGCAAGATTGCCAGAAACGCATCAGCACGGCGATTAA
CGAAGTGGTACTTCATCCTGGCAAAGTGGCGCATATGATTGAGTTCGAAGTGTATATCGA
CGAGATCTTTGCGTTTTCGCAGCGTTCCGATGGACTGATTATTTCGACGCCAACAGGCTC
CACCGCATATTCCCTCTCTGCGGGCGGTCCTATTCTGACACCCTCTCTGGATGCGATTAC
CCTGGTGCCCATGTTCCCGCATACGTTGTCAGCACGACCACTGGTCATAAACAGCAGCAG
CACGATCCGTCTACGTTTTTCGCATCGCCGTAACGACCTGGAAATCAGTTGCGACAGCCA
GATAGCACTGCCGATTCAGGAAGGTGAAGATGTCCTGATTCGTCGCTGTGATTACCATCT
GAATCTGATTCATCCGAAAGATTACAGTTATTTCAATACATTAAGCACCAAGCTCGGCTG
GTCAAAAAAATTATTCTAATTTTACGCCAGCCTCTTTACTGTATATAAAACCAGTTTATA
CTGTACACAATAACAGTAATGGTTTTTCATACAGGAAAACAACTATGTTGGCACAACTGA
CCATCAGCAACTTTGCTATCGTTCGTGAGCTTGAGATTGATTTTCATAGCGGCATGACCG
TAATAACTGGCGAGACCGGCGCGGGTAAATCTATTGCAATAGATGCCCTCGGCCTTTGTC
TCGGTGGTCGCGCTGAAGCCGACATGGTGCGTACCGGCGCTGCTCGTGCCGACCTGTGCG
CCCGTTTTTCTCTGAAAGATACGCCAGCGGCCCTGTGTTGGCTGGAAGAAAACCAGCTTG
AAGACGGGCATGAATGTTTGCTTCGTCGCGTAATCAGCAGCGATGGTCGCTCCCGTGGTT
TCATCAACGGTACAGCTGTTCCTCTGTCACAACTGCGCGAACTGGGTCAGTTGCTGATTC
AGATCCATGGTCAGCACGCTCATCAGTTACTCACCAAACCCGAGCACCAAAAATTCCTGC
TTGATGGCTATGCCAATGAAACCTCTCAGCTCCAGGAAATGACCGCACGTTATCATTTGT
GGCATCAAAGCTGCCGTGACCTCGCGCATCATCAACAGTTAAGTCAGGAACGCGCCGCTC
GTGCGGAGCTGCTGCAATACCAATTAAAAGAACTTAACGAATTTAATCCGCAGCCTGGAG
AGTTTGAGCAAATCGACGAAGAGTACAAACGTCTGGCGAACAGCGGTCAATTGCTGACCA
CCAGCCAGAATGCATTGGCATTAATGGCTGACGGTGAAGACGCAAACCTGCAAAGTCAAC
TTTACACGGCTAAACAACTGGTGAGCGAATTGATTGGCATGGACAGCAAACTGTCCGGCG
TACTTGATATGCTGGAAGAGGCTACCATCCAGATTGCTGAAGCCAGTGATGAACTGCGCC
ACTACTGCGATCGTCTGGATCTCGATCCCAACCGACTGTTTGAACTTGAACAGCGCATCT
CAAAACAGATTTCGCTGGCACGTAAACATCACGTCAGCCCTGAGGCATTGCCACAGTATT
ACCAGTCGCTACTGGAAGAACAGCAGCAACTGGACGATCAGGCCGACTCACAAGAAACGC
TCGCGCTGGCGGTAACGAAACATCATCAGCAGGCACTGGAAACGGCGCGCGCGTTACACC
AGCAACGCCAGCATTATGCAAATGAGTTGGCACAGCTGATCACCGATAGTATGCATGCAC
TCTCTATGCCACATGGGCAGTTTACGATCGATGTTAAATTTGACGAGCATCACCTGGGCG
CTGACGGCGCTGATCGTATTGAGTTTCGGGTAACCACCAACCCAGGTCAGCCAATGCAGC
CTATTGCCAAAGTCGCATCCGGTGGTGAGTTGTCCCGCATCGCATTGGCAATCCAGGTCA
TTACCGCGCGTAAAATGGAAACCCCGGCACTGATTTTTGATGAAGTGGATGTAGGGATTA
GCGGCCCAACAGCGGCAGTTGTCGGCAAACTGCTACGTCAACTTGGCGAATCAACTCAGG
TGATGTGTGTTACCCACCTGCCACAAGTCGCGGGATGTGGTCATCAACACTATTTTGTCA
GCAAAGAAACTGATGGTGCGATGACAGAAACGCATATGCAATCCCTGGATAAAAAAGCGC
GGTTACAAGAGTTGGCGCGCCTGCTTGGTGGCAGTGAAGTCACACGTAACACACTGGCGA
ATGCGAAAGAACTGCTTGCGGCGTAAACTTTTTCCTGCTTCACGGTCAGAGTAAACAGCA
AAACGCCGTAAGACCGGAAAGCAAAAGGTTTTAAAGTGATGAAAGGTCTATTATCATCGG
CATATTACAGATGAGCCACGTACTGCTCGGGCCCGAAAAGGAATCAAATCACTATGCGCT
GTAAAACGCTGACTGCTGCAGCAGCAGTACTATTGATGTTGACCGCAGGCTGTTCCACTC
TGGAGCGAGTGGTTTACCGTCCTGACATCAACCAGGGGAACTATCTGACCGCTAACGACG
TATCCAAAATACGTGTTGGCATGACGCAACAACAAGTTGCGTACGCATTGGGTACACCGC
TGATGTCCGATCCATTTGGTACAAATACCTGGTTCTATGTCTTCCGCCAGCAACCTGGTC
ATGAAGGTGTAACGCAGCAAACGCTGACGCTGACCTTTAACAGTAGCGGTGTGTTGACCA
ACATTGATAACAAACCTGCGCTGAGTGGTAACTAATAATAAAGTTGCTCTCAAAGACGTT
AAAAAAGGTGCTCAATGAGCACCTTTTTTCTGTCTGTTATTTATTCGCTGATTTTTCTGC
TCGTTGCCTGCGAAGCTCTTTCGGATCGGCAATGAGAGGACGATAAATCTCCACCCGATC
GCCATCATGCACAATATCGCTGAGTTTTGCCGGACGGCTGTAAATGCCGACTTTGTTTTT
AGTTAAATCGATATCGGTACGCAATTCCAGCAAACCACTGGCGCGAATAGCTTCTTCAAC
CGTCGCGCCCTCCTGCAACGTCACGCGCTGCAGGTACTGCTTCTCAGGTAGCGCATAAGC
CACCTCAACGGCAATTTTACCTGGCACTGTAGACCTCTTTTGCACGAACAGTAAAAGCCT
GCACCATATTAGCTGCCAGCTCTTTAAACACACGACCAAAGGCGAGTTCAATCAACTTAT
TGGTAAACTCAAAGTCGAGATGAAATTCAATACGGCACGCGTCCTGGCTCAACGGCGTAA
ACTTCCAACCGCCGATCAATTTCTTAAACGGTCCATCAACCAGACTCATGAGAATACTTT
GATTACTGGTCAACTGGTTGCGGGTTGTAAACGTTTTGCTGATCCCAGCCTTAGACACAT
CTACCGCAGCAGTCATCTGCCCAGGAGTGGACTCCAGAATCCGACTTCCGGTACAACCCG
GCAAAAACTGAGGATAAGACTGAACGTCATTCACTAACTGATACATTTGCTCCGCGCTGT
AGGGCACCAGTGCGGTCCGGCTAATCTGAGGCATAACAATTTCCATCAACAAAAATCCAA
CAAATAATATCATTTATCCTGCTGTAAAAAAAACGCTATCCCGGCGCTGGGTAACATCGG
GTTCATGCTAAGATAGAGCCTTGTCCCCCGCAGGATTGATATGGGGTGTTTTCGATTTCA
GATTACCGATGATTCACGACGCTTATGACGAAGAAAAAGCACATAAACCTGGTTCAGCGA
CCATCGCGCTTAACAAGCGCGCCCGTCACGAATACTTTATCGAAGAAGAGTTCGAAGCGG
GACTTGCCCTGCAAGGCTGGGAGGTTAAATCCCTGCGTGCAGGAAAAGCCAATATCAGCG
ACAGCTACGTCCTTCTGCGTGACGGAGAGGCATTTCTGTTTGGCGCTAACATCACGCCAA
TGGCTGTGGCCTCCACGCATGTGGTGTGCGATCCTACCCGTACCCGCAAGTTACTTCTCA
ACCAGCGCGAACTGGACTCATTGTACGGTCGCGTCAATCGAGAAGGCTATACCGTAGTGG
CGCTCTCCCTGTACTGGAAAAATGCCTGGTGCAAAGTGAAAATCGGCGTCGCCAAAGGTA
AAAAACAGCACGATAAACGTTCAGATATCAAAGAACGCGAATGGCAGGTGGATAAAGCGC
GTATCATGAAAAACGCCCATCGTTAAACCTATATAAGCGATACTAATCAAATCCTCACCG
CGCCTCCCTATCCGGTGGCGCGAATGAACATCTTATCGACTGTCAAATCTGACACAGATG
TAGCCATCCCATTGCTTAATCGAAAAAAATCATACTATGCAGGCGCTAATTCCAAGATGA
TAACGCCTTTTGGGCTAGTCATGCTGCTCATAAATCTGGTATACTTACCGTTATACATTG
GGGCTGATTCTGGATTCGACGGGATTTGCGAAACCCAAGGTGCATGCCGAGGGGCGGTTG
GCCTCGTAAAAAGCCGCAAAAAATAGTCGCAAACGACGAAAACTACGCTTTAGCAGCTTA
ATAACCTGCTTAGAGCCCTCTCTCCCTAGCCTCCGCTCTTAGGACGGGGATCAAGAGAGG
TCAAACCCAAAAGAGATCGCGTGGAAGCCCTGCCTGGGGTTGAAGCGTTAAAACTTAATC
AGGCTAGTTTGTTAGTGGCGTGTCCGTCCGCAGCTGGCAAGCGAATGTAAAGACTGACTA
AGCATGTAGTACCGAGGATGTAGGAATTTCGGACGCGGGTTCAACTCCCGCCAGCTCCAC
CAAAATTCTCCATCGGTGATTACCAGAGTCATCCGATGAAGTCCTAAGAGCCCGCACGGC
GCAAGCCCTGCGGGCTTTTTTGTGCCTTGAATTTGTCCCGCGAAGTCTGATGCCAACTAA
TTAAATCCGAACCTTTTAGGCACCTTGTTAGGCACCTCATAAAGCTTTATTGTTTTTGAG
GTGCCTAAAACTATGGAAACCCGGCAATGGCAAGACAAACCAAACCTCTATCCGTTAAAG
AAATCGAATCTGCTAAACCCAAGTGTCAACGACGGATGAAAAGTGATCCACTTATATCTC
CACCAACGACCCAATATTGATCCACCGTTTTACTCAGGATTAGCTTCTGCTATAAACTTG
GCCTTTCGTTTCTATCTGAGTCGATAGCTTTCTCCTTTGATTTGAATGACATGTGAGTAG
TGTAAGATACGGTCCAGCATCGCTGAGGTCAGGGCTGCATCACCGGCGAACGTTTGATCC
CACTGCCCGAACGACAAATTGGATGTCAGGATCATTGCGCTCTTTTCGTAACGTTTAGCG
ATGACCTGGAAGTACAGCTTTGCTTCTTCCTGACTGAACGGCAGATAGCCTATTTCATCA
ATGATGAGCAGGCGGGGGTCATTACTCCACGCTGAAGCGTCGTTTTATAACGGCCCTGAC
GTTGTGCCGTAAATAACTGAAGTAACAGATCTGCTGCTGTTGTGAAGCGAACCTTGATAC
CTGCACGGACTGCTTCCTAGCCCATCGCTATTGCCAGATGGGTTTTCCCCACACCTGATG
GCCCCAGTAATACGATATTTTCATTACGTTCTATGAAGCTGAGTGAGCGTAACGACTGGA
GTTGCTTCTGCGGTGCTCCGGTGGCGAATGTGAAGTCATACTCTTCGAACGTTTTCACCG
CCGGGAAGGCTGCCATTCGGGTATACATCGCCTGTTTACGTTGATGACGTGCCAGTTTTT
CTTCATGAAGCCGATGCTCCAGAAAGTCCATATAACTCCATTCCTGGTCTACTGCCTGTT
GTGACAACGCAGGCGCTGCGCTTATAAGGCTTTCCGGTTGCAACTGCCCGGCGAGCGCCA
TCAGTCGTTGATGTTGCAGTTCCATCATCACGCCACTCCTCTGCAGAATGAGTCGTAGAT
GGAGAGTGGATGATGCAGGGGGTTGTCGAAGTTCACCAGATTTTCATCAAGATGCACGTC
ATACTCTTTTTTCTCCGGAGGCAGTGCCAGCATGGACTGCTGCTCTTCGTGCCAGCGATC
GCAGGGACGGGCCTGGATTGTTTCATGCTTTCGTTGGTTAGCAACATCGTGCAGCCAGCG
CAGACCGTGGCGGTTGGCTGTTTCAACATCGACAGTGATCCCCATCGGGCGCAGGCGAGT
CATTAGTGGGATGTAAAAACTGTTACGGGTGTATTGCACCATCCGTTCCACCTTACCTTT
AGTCTGTGCCCTGAAGGGACGACACAGTCGGGGAGAGAAGCACATCTCCTTGCCGAACTG
CCACAGCGAAGGATGGAACCGGTGCTGACCGGTCTGATATGCGTCACGTTGCAGAACCAC
AGTTTTCATATTGTCATACAACACTTCGCGCGGCACACCACCAAAGAAGCGGAACGCATT
ACGATGGCAGGTATCCAGCGTGTCATAACGCATATTGTCAGTGAATTCGATGTACAGCAT
TTGGCTGTATCCGAGAACAGCAACGAACACGTGAAGCGGTGAGCGACCATTACGCATAGT
GCCCCAGTCAACCTGCATCTGTCGTCCGGGTTCAGTTTCGAACCGAACGGCAGGCTCCAG
CTCCTGAGGAACCGAGAGAGAACGAATGAATGCCCTGAGAATGGCCATTCCGCCACGATA
TCCCTGGTCTCTGATCTCGCGAGCGATTACCGTTGCCGGGATTTTGTAAGGATGAGCATC
GGCGATGCGTTGACGAATATAATCCCGGTATTCATCCAGGAGTGAAGCAACAGCAGGTCG
CGGCGTATATTTTGGCGGCTCAGATTTTGCCTGCAAATAACGTTTAACGGTATTGCGGGA
GATCCCCAGTTCTCTGGCAATCGCCCGGCTACTCATTCCCTGCTTGTGCAGGATTTTAAT
TTCCATAACTGTCTCAAAAGTGACCATAAACTCTCCTGAATCAGGAGAGCAGATTACCCC
TGGATCTGATTTCAGGCGTTGGGTGTGGATCACTATTGCACCGTTAGTGACACCAAGGAA
GCGGACTACGTTCTCTATGATGGCGATGGCCTTGAGCTACTTATCAAATCCAGCGGGAGT
AAAATCTGGCAGTTTCGCTACATTCGCCCTGTCACCAAGAAACGTGCGAAGAAGAGCATA
GGCCCCTACCCGTCAGTTACGCTTGCCGATGCCAGAAACTACCGGGCAGAGTCACGCTCT
CTCCTGGCGAAACAAATCGATCCACAGGAACATCAGCAAGAACAACTTCGCAGTTCGCTT
GAAGCTAAAACCAATACTTTCCAACTCGTGGCTGAACGATGATGGAATGTGAAGAAAGCC
AGCGTGACAGAGGACTATGCCGACGATATCTGGCGCTCTATTGAAGAGATGTCTTTCCTG
CAATTGGCGACGTTAGCGTTACAGATATTAAAGCTCACACACTGGTTCAGGCCGTCCAAC
CGGTTCAGGCCAGAGGAGCAAAACCGTTTGTCGCCTGTGCCAGCGCATTAATGAGGTCAT
GACCTATGCCCAAAACACATGGCTGATTGATGCTGTTCCCAGCGTTAATATTGGTAAAGC
CTTCGAGAAGCCTCAGTAAAAGAACATGCCCAGCATTCGACCGGATCAGCTACCTCAACT
GATGCAGACAATGCGAACAGCCAGCATTAGCCTTTCCACACGCTGCCTGTTCATGTGGCA
ACTTCTTACTATTACCCGCCCTGCCGAAGCGGCTGAAGCTCGCTGGGAAGAGATAGACAT
AGAAGCACAAGAGTGGAAGATTCCTGCAGCACGCATGAAAACGAACCGCGACCATACTGT
TCCATTGTCAGATGAAGCAATTGCGATACTGGAGATGATGAAGCCGTTAAGTGGAAATCG
AGAATTTATCTTTCCCAGCCGCATCAAGCCAAACCAGCCGATGAACAGTCAGACCGTAAA
CGCATAGCTAAAACGCGCAGGTTTTGGTGGGGTGCTCGTTTCACACGGCCTGCGATCTAT
CGCCAGTACAGCCCTTAATGAACAAGGCTTTCCGCCTGATGCCATTGAGGCAGCACTTGC
CCATGTAGACAAGAATGAAGTTCGTCGCTCTTATAACCGCAGCGATTACCTGGAGCAGCG
TCGTCCAATGATGCAGTGGTGGACGAATTTTGTTCAAGCGGCAGATCGTGGAAGTATTAT
TGAAGGTGGGATGAAAGGAATGCGATTGGTTGGATAACGATTCACTCTGCCTACGTTATT
ACAAATAGCGTCCGATTAGAGGTGTGATTCATAGACATCGTTTCAATTTTCTCAGTTCAA
GTTCAAGCTTGTAATTCTGTTCCTGTATATGCTCTTCATTGGGCTGATACTTTGCATGAA
CGGCATCGGAGTATGGTGTTTTCTCAGCAAGTTCAAAGTAGCGCTCCATCGGAGTTTTAC
CGTTGTGAGCGCTATGAGGACGTTCCCAGTTATAGTAATGCTGCCATTCTGCCTGCAGTT
CCTTCAGGTCATCAGCAGAAAGATCTACGGTAGCGTAAGACTCTGCTTTGTCTGTCTTTT
GGGAACGTTCAACCTTTCCGTTAAGATGAGGTGACGCTGGCTTATTTGGACGAAACTTGA
TGCCGTATTATTTTAATCTTTCCTGCACTTTAACGGCAAAAAATTCTCTTCTCCGGTCTG
TCTGAGAGCGCTATATCGGGAAAGGCATTTCTTCAATAACACAATCAATAAAATCCAGTG
AGTTTACCGCCGTGCGACAAGAGTAGAGCCTCAGGACTCTGTAGCGAGTGCAATCATCAA
CAGATGTGTACTGATATAAGCCGGGGCCAATTTTACAGGTATCCATCTGAACCCGATCAC
CGGGAACAGGGCGTTCGTAGCGAATGAAATCAACTTCACGCCGAAATTTAACAACAGGTT
TAACCTGATTCTGGCAAAGGACTTTGTGGATTGTTGCTATTGCCAGTGAGTCGTTTTAAC
TCGCTTTGAATACGTCTTGCACCCAGATTTCGCTGAGAACGTAACTCCAGAATCAGAGCG
ACTTCGCAAGTACCGGTTTTCGTTGATGGTGAACGCTTGAGGCGACGGCATATAAATCCC
GCATCACCGGACGTTTCATAGAATTTTACCCACTGTAGCCGCTGCTGAATTTCCCTGTAC
ATAGTGAGGTATTATAGTGAAACGATGTCTATGAATCACACAATTCAAAAATGACGATCA
AACAATTCTGTGAACAGGAACATATTCTGGTGTCCACAGAAGGTCATTTTACTGGTGTAA
CGGATGAGGTACTGGCTGAGTTAAATCTCAAGCGACGTGTCGGTATTCTGTTAACAGCTT
TTTGGTGATACCAGACATATTACGATTAACTGACATGATTGCTGTTGTACCCAGCCGTAT
GGTCCCGAACAACAGTGACCTTACTATCATTCCCTTACCGATTAAAATTCCAGGCTTCAC
TAAAAGCATGGCGTGGCACGAGCGTACTCATCATGATCCAGCCCATCAATGGATTCGCGC
TTTGTGCTTTGAGATAAACCAGTACTCCACAACGGTGATATAAGTTTTCTTATTCAGATC
ATAAAGAATAACGATTGGCATTATAACACAATAATCTCAATAATTGTTGCTGCCACATTG
AATACGGCTTCTGAAGCAACATGCTCAGCACAATTAATTACCGTAACTGGAGAAATTTAT
GAACGAGATTAACTGGCCTGAAGGTTTTGTTCCTGGTTTTACTGATAACTTTGTTTCCAA
TGAAATGATTATCTCTGGTCTTAATGTTAAAGATATCTGGCCGCTTCTGAGTCAGCCATT
CCTGTGGCCAAAAATTGTGCTGATATTCGCTTTTACGATAACAAAAAGCCAGAACTGGAA
AATGGGGTGCGTTTCTATTTCAAAACCTTTGGTTTTCCTGTTGAAGCTCAGGTTGTGGAG
TTTGTCCCACCGATGGAAGGCAAACCTGCTCGTCTGGCCTGGCACGGATGGTCCGGTGAA
GAAAATACTACTCAACGTCTCGATGTACATCATGCATGGTTACTGGAGGATCTTTCCAGT
AACCGGGTACGTATCCTGACGCAGGAAACACAGAACGGAGTTCCGGCAAAAGAACTGGCA
AATACTCGCCCGAACCCAATGCTGAATGGTCACCAGGCATGGCTTGATGGCCTAGTTGAA
GCAGCAACGAAATAATGACTGACTTTCTACTGTCATATCACTAAGGTTGCGCTTAATCGC
AACCTCAAAAATTTTTATCACTTTTTTACTCTTACTATTAGCCACGGGTAAAAAGTGGCG
TTTTCGCAACCAGTGAACGGTCACCTAAAAAATCACCGAAATTCTTATCAGTAGCTGAAG
TAATGGTATTGCCGAGGACCATGTAAATCGTCTGAAAATGATGAAACTACAGATGTATGG
TTGTTCTGGATTCGAATTACTGAGGCGAAGGGAAATGAGTCCACTGGCATGAAAATCTCC
CCTAAGTTGGGGGAAGTGCCACTTTCATTTAGAGGGTGTCCAACATCATCAGTTTGTTAA
CGAAGGAGAGCGCTATTCCAACTATGCTTCGCATGGACAATAATCCAAAATTTATCTTGC
TGACACAGGCTGAACAGGCAGAGAAATATGCATTAAAACCGTAGGTTATCCAGCCGGGTA
AGCCAAAGCTGAACGCGCTCATTGAGCACTTTAACCGGACATATTGCACAAAAATATTTA
ATTTTCATTTATTCAGAATGCTGTATTAACAATGTTAACTCACAGAAAATAATTATCAAA
AGCAGTATATAAACATACTCAGTTCAAATATCATCGTAATTTGATTTTGAGAAACATGTT
TCACTTTTGTTTGTTTTTATTATGAGAGCAAAATGCGAGCTTCTTGTGAGAAAGATTTTC
GTGTCTATAAAAAGGCCTGCCAGATGGCAGGCCAGATTTAAACGTCTGTCAGAAAGAATA
ACGGAAGTTAGCGTTTATCGCATTGTCCACGTTATATTTCCCGAACGCCGATTTTTCCAG
CTCCAAGCCAAAACGCATATTATCCTTAATTTCCGCATTCATCCCCACATTCATCAGCAT
TCTGCTGTCCTTTTCACCTTCAAAACGTTTCTCTCCGGATGCATCCCGCAGAACCGTTTC
TCCGTTCGCCAGCAGGTCGAACTGGTAACCCAGCCCGGCTCGCGCGGTAATTTTCCAGTC
GTCTCCGGAGAAGGTTCTTCCCACGTCAACACCGGTACGGCCAATCAGTGGGTTATAATC
CTTGTCTTTCATGCTCAGGGCCATTCCCCGGTCTTCCCAGCTAAAAGATTTTCCTGACAC
AGAACCGTAAACCAGCTCCATCTGTGGCTCCACCCAGGACTCTTCCGACAGGTGGTAACG
ATACCCGACCTCTGCACCGGCATACCAGGAATGAGAGCTGTAGTCTTTTGTACCAAGAGA
CGCAAAACTCGCCGTGTACTGATTGTCGTGATGGAGATATTTACCAATCAGGTCAAAATA
AGCCCCGGAATCAAAGAGTGCTGAAGCGTACAACCCTCCCCCCACGGATTTGGTTTTACC
ACTGAAGGCGTGGCTGCTTGCATTGCTGTCTGTATAGGTCAGTAATGCACCCGTGAACAA
ATCCACACCGTCCAGCTCATGCTTTCTGTCGGCACCAATCTGAACGTGAGTGTAGTTATC
GCTGTAACCACCATCTGCCGAACCGGTACCGTTCATGATGCGCGCCCAGACGCCGGCATC
CCCCTGAGTATCCCGCAGGTCACCCATACGCTTGTTCAGATTATTGACCTCTGTCAGGAA
GGATTTATAACCTGACGCCATAAAGTCCGTTGCGGTTTTCGAGGCACCGGCATCAGAGAC
GGTCTGATACCCTGTCAGCATCCATTTTGTGGCATCATCCGTTTTTTCTGTGCTGATTAC
CGGCGTGACATTACTGAAACCAATCTGCTGCGTTCCTGCAGTGAACGTTTTCTCGTCACT
CCCTTTCGGTGCGGTAATTAACGTCACGTTCATTTCACTGGCTGGCTTGTTTAAAAAGTC
GACCAGGACGGTATTATTACTGCCCAACAGTTTATTCGTGACATTCAGCTGGTCAGCCTG
ACTGTTGTTGGTATGCATCAGGAATGTGGCGTTATTTGCGTTAAGCTCTTTTACCCGCAG
GGTGGCAAAGTCTTTCCCGCCCCCCAGTTCAACTCGTCCCCCCGTACTCTTCAGCGTTCC
GATCGTTGAGTTTCCGTCAGAGTACCACAGAGCATTGTTCATATTTACCGTACTCTGCTC
ACCCGTAATGTTGCCACTCAGAACCGCGTTATATCCCTTCATCAGGGAGCTGAATAACGG
AGAATCCGTCTCAGCATCACCGTCTCCCAGATTAATGGTTGCCGCCGTGGTTCCTGCATG
AATATCCGAACTCAGATAGCCCATGTTTTTAACAGAAAGGCTGGCCTTATCTCCGAGGTT
AATCCCTTCCGTTGTAGAAATCACAGGGGAGTAATACTCCTGTTTCTGTGCAGAAGGTGT
CCCCGTCAGGATCAGGGAGGCATTTTCTTTTACGTCCACAGCCCCGGTGCTGAAAATACC
GCCCTGAGCCGTTAGTTTTGCTCCTTTTTCGAGGGTCAGGCTGCTGTTGACAAAGCTGCC
AACACGATCAAAAACAGCATTCTGTGAGGTCACACTCACGGAGCTGTCATAAGCCTCGAT
ACCACCGGTAAATTTATTACCAATATCCAGTAATGAGTGATTATTCAGCGTAACATTTCC
AAAATAACTGCTGCTCTCAGGAGAAACAGATACACCATCTTTAATATCCTGCCGAAAACC
GAAGCCATCTCCCGTGATGTTTTTGCCGTCATACATATCAATATGTACTTTTGTATCTTT
TCCACTTAAAGACAGAGTGGAATTATTGGCAGAAATATCACCAACAACAATAGCATTACG
GCCAACGATAAAATCTGAATTTATCAGATTCAATGTCTTAAACTTAAACAGACGATTTTC
CCAGTCAGGTTGCTCAAATGATGATACCTGATTATTGGTCTTATAATCTGTATTATTATT
TTTATTGGCTGAGTTTTCCTGTTGCTGTATGCCTGAAACATAATCCTTTTCACAAATAAC
TCCTGGCAGCATGCAGGTAACCCCACCCTCTCTAAAAACAGCATGAGATGTAGCATGTCC
CTGCATGGTGAGCTGGCTATTCTTAATGTTAATGTCATTTGTAATATCGACATTACCGTC
CAGAATCAGGCGACTATTATTTTTTTGGGTATCAAACTGGTGGTTTATCTCTGTATTACC
TGAAACAGAACCATGATACATATAGTTTGACTGATTATTAACAGAAAGAACTGCTTTCTG
CACTGCACTATTTGTTATGAGTGCTCCTATATCTGTCGCTGCAATTTTATTAAAACTCTG
GTCATAACCATTTAAATCCAGAGTACCACCATTTTCAGTAAAGAAAATACCTCTATAGTC
ATTGTTCTGGTTAAGCGCTGCACTATGATTAATTTTTACAACACCATGACCACTGGCCAT
ATAAATATTATCAAATGCATTAGCGCTATTTAATACGACAAGACCATCCCCCGTTTTAAG
ATTATTACCTTGAGAAACATTAACATTCAATGTACCTGCACCAATTTTATGCAGGTTATC
ACCGACAACCCCTTTCACATTCCAGTCGACTGTAGTATTGTCACCAATATCCAGCCCGGC
ACCCTTGAATGTTTTATTATTACCAGTGACAGTATAATGATGCCCTGCATCAAAAATGAG
ACCACCAGAGCCAATGTTTACGTCATTGTCGAAATTAATACTTCCACCACCACTAAAACT
TAGATCTTTATAGTTATTATTATTTTTTTCCACTGCTGTATTATTACCAGCTAACGTAAA
ACTGTCACTATTAAGCGACATTGTATTATTGTTTAACTGGACTTTTTGAGTAAATTTGTT
TTTTAAACCATTAACTGTATTTTCATCATACTGATTCAGAATAGACCAAACATCTGCACC
ACTGGATGCTATTCCAAATAAAGTACCAAGCATAACCCATTCTTTTTTTACGTTATCATA
CAGATAGAAACCGGAACCACTGTCTCCACCGGTAGTTTCATTATAAAAAGGTGTCGTGTT
ATTATATGGTCTTTTGTTATCCCAGTTTAACTGAAACATTGAAGCGCTTAACAAAAGAGG
ATTGTATACCTGTCCTGTACTATATGTATTACCATTTTGAACGGTATAAGTCGTCCCAGC
CCCAACCCTGAAACCAATGATTTTTTCTCACCATTGATCTCCACACCATAACGTTCAAGA
GCATCATGACTATTGAGAGAAAAATCTACTGAATTTTTACCCCTGTTGTTTCAACAACAA
ACTTATCAAGTCGTGTTACAGCAAAATCTCCATTCGTCATCCGGTCTATATATTTATATG
AGCTTTGTCCCCAGTTTTGGGTGCTTATTGCATGATGAGTTGTTCCGTTATGGGTTGCTG
TGACACTATAAGCTCCACCTATAGATGTAGTAGCGCCTTTATTTGAGGCCGGCGAGAAAT
CAGGAATTGGAACATTTGGAAAATTAAACGTCTGGCCATTCTTGAGTTGAATTGAAACAT
TGGTCGCACCAGCTTTAAACACCCCCTTATTTTGTGCGAGGTCTAAATAATCTCTAGCCC
[truncated: 4,622,396 more chars]
